# Supplementary material for: The SHDRA syndrome associated gene TMEM260 encodes a protein-specific O-mannosyltransferase
Source: Research Square preprint supplement (doi:10.21203/rs.3.rs-1615826/v1), 2022-05-13
Supplement: Supplementary file 2 [file 956d6bc72d8b0ab14e0f93b2.xlsx]

## Sheet: Dataset S1
Experiment	Cell line	Setup	Stable isotope labels
1	HEK293 COSMC/POMGNT1 KO	Control	Dimethyl (medium)
	HEK293 COSMC/POMGNT1/TMEM260 KO	Case	Dimethyl (light)
2	HEK293 COSMC/POMGNT1 KO	Control	Diethyl (heavy)
	HEK293 COSMC/POMGNT1/TMEM260 KO	Case	Diethyl (light)
3	HEK293 WT	Control	Diethyl (heavy)
	HEK293 TMEM260 KO	Case	Diethyl (light)
4	HEK293 TMEM260 KO/TMEM260 WT KI	Case	Diethyl (heavy)
	HEK293 WT	Control	Diethyl (light)
5	HEK293 TMEM260 KO	Control	Diethyl (heavy)
	HEK293 TMEM260 KO/TMEM260 WT KI	Case	Diethyl (light)
6	HEK293 TMEM260 KO/TMEM260 WT KI	Control	Diethyl (heavy)
	HEK293 TMEM260 KO/TMEM260 Q465* KI	Case	Diethyl (light)
7	HEK293 TMEM260 KO/TMEM260 WT KI	Control	Diethyl (heavy)
	HEK293 TMEM260 KO/TMEM260 Y576Tfs*27 KI	Case	Diethyl (light)
8	HEK293 TMEM260 KO/TMEM260 WT KI	Control	Diethyl (heavy)
	HEK293 TMEM260 KO/TMEM260 C98Y KI	Case	Diethyl (light)
9	HEK293 TMEM260 KO/TMEM260 WT KI	Control	Diethyl (heavy)
	HEK293 TMEM260 KO/TMEM260 C453R KI	Case	Diethyl (light)
10	mIMCD-3 WT clone#1	Control	TMT 126
	mIMCD-3 WT clone#2	Control	TMT 127
	mIMCD-3 Tmem260 KO clone#1	Case	TMT 128
	mIMCD3 Tmem260 KO clone#1	Case	TMT 129
	mIMCD3 Tmem260 KO clone#2	Case	TMT 130
	mIMCD3 Tmem260 KO clone#2	Case	TMT 131

## Sheet: Exp1
Sequence	Protein Descriptions	Protein Group Accessions	Modifications	Activation Type	Ratio (Medium/Light)	ΔScore	ΔCn	Rank	Search Engine Rank	Quan Channel	XCorr	Amanda Score	E-Value	P-Value	# Missed Cleavages	Isolation Interference [%]	Charge	m/z [Da]	MH+ [Da]	ΔM [ppm]	RT [min]
NQLTSNPENTVFDAK	78 kDa glucose-regulated protein OS=Homo sapiens GN=HSPA5 PE=1 SV=2 - [GRP78_HUMAN]	P11021	N-Term(Dimethyl); T4(Hex); K15(Dimethyl)	HCD	0.726596	1	0	1	1	Light		304.262	1.9038e-28	3.74765e-31	0	19.8563	2	948.466	1895.92	0.344156	77.7413
ELEEIVQPIISK	78 kDa glucose-regulated protein OS=Homo sapiens GN=HSPA5 PE=1 SV=2 - [GRP78_HUMAN]	P11021	N-Term(Dimethyl); S11(Hex); K12(Dimethyl)	HCD	0.831152	1	0	1	1	Light		433.345	7.17592e-42	4.62963e-44	0	9.03329	2	808.456	1615.9	-0.0848053	99.1482
ETPAATEAPSSTPK	Brain acid soluble protein 1 OS=Homo sapiens GN=BASP1 PE=1 SV=2 - [BASP1_HUMAN]	P80723	N-Term(Dimethyl); T6(Hex); K14(Dimethyl)	ETciD	1.39987	1	0	1	1	Light	1.7556				0	54.6399	2	802.899	1604.79	-0.22606	43.1123
ETPAATEAPSSTPK	Brain acid soluble protein 1 OS=Homo sapiens GN=BASP1 PE=1 SV=2 - [BASP1_HUMAN]	P80723	N-Term(Dimethyl); T6(Hex); K14(Dimethyl)	HCD	1.39987	1	0	1	1	Light		424.818	1.37828e-40	3.29733e-43	0	54.6399	2	802.899	1604.79	-0.22606	43.1252
ETPAATEAPSSTPK	Brain acid soluble protein 1 OS=Homo sapiens GN=BASP1 PE=1 SV=2 - [BASP1_HUMAN]	P80723	N-Term(Dimethyl:2H(4)); T6(Hex); K14(Dimethyl:2H(4))	HCD	1.59848	1	0	1	1	Medium		352.616	2.33229e-33	5.47487e-36	0	63.3831	2	806.924	1612.84	0.505209	43.5426
LNEDAAVGSSVLTLQAR	Cadherin EGF LAG seven-pass G-type receptor 1 OS=Homo sapiens GN=CELSR1 PE=1 SV=1 - [CELR1_HUMAN]	Q9NYQ6	N-Term(Dimethyl); S10(Hex)	ETciD	0.586308	1	0	1	1	Light	2.81916				0	0	2	967.508	1934.01	0.175252	89.2141
LNEDAAVGSSVLTLQAR	Cadherin EGF LAG seven-pass G-type receptor 1 OS=Homo sapiens GN=CELSR1 PE=1 SV=1 - [CELR1_HUMAN]	Q9NYQ6	N-Term(Dimethyl); S10(Hex)	ETciD	0.743171	1	0	1	1	Light	3.58427				0	44.1697	3	645.341	1934.01	0.262976	89.2254
LNEDAAVGSSVLTLQAR	Cadherin EGF LAG seven-pass G-type receptor 1 OS=Homo sapiens GN=CELSR1 PE=1 SV=1 - [CELR1_HUMAN]	Q9NYQ6	N-Term(Dimethyl); T13(Hex)	HCD	0.586308	0.6816	0	1	1	Light		792.897	1.95003e-77	5.13165e-80	0	0	2	967.508	1934.01	0.175252	89.2226
LNEDAAVGSSVLTLQAR	Cadherin EGF LAG seven-pass G-type receptor 1 OS=Homo sapiens GN=CELSR1 PE=1 SV=1 - [CELR1_HUMAN]	Q9NYQ6	N-Term(Dimethyl); T13(Hex)	HCD	0.743171	1	0	1	1	Light		440.783	3.14786e-42	8.34976e-45	0	44.1697	3	645.341	1934.01	0.262976	89.2368
SATTYITVLVK	Cadherin EGF LAG seven-pass G-type receptor 1 OS=Homo sapiens GN=CELSR1 PE=1 SV=1 - [CELR1_HUMAN]	Q9NYQ6	N-Term(Dimethyl); S1(Hex); K11(Dimethyl)	HCD	0.293265	1	0	1	1	Light		302.86	1.04562e-28	5.17636e-31	0	15.7615	2	707.408	1413.81	0.285986	94.2286
LNEDAAVGSSVLTLQAR	Cadherin EGF LAG seven-pass G-type receptor 1 OS=Homo sapiens GN=CELSR1 PE=1 SV=1 - [CELR1_HUMAN]	Q9NYQ6	N-Term(Dimethyl); T13(Hex)	HCD	0.568054	1	0	1	1	Light		473.61	1.62012e-45	4.35515e-48	0	26.4794	2	967.507	1934.01	-0.582162	91.4261
VTASDRDKGSNAVVHYSIMSGNAR	Cadherin EGF LAG seven-pass G-type receptor 2 OS=Homo sapiens GN=CELSR2 PE=2 SV=1 - [CELR2_HUMAN]	Q9HCU4	N-Term(Dimethyl); T2(Hex); K8(Dimethyl)	ETciD	0.484103	1	0	1	1	Light	8.08344				2	41.3708	4	689.094	2753.35	0.28141	62.2847
EDVTPGAPVLRVTASDRDK	Cadherin EGF LAG seven-pass G-type receptor 2 OS=Homo sapiens GN=CELSR2 PE=2 SV=1 - [CELR2_HUMAN]	Q9HCU4	N-Term(Dimethyl); T13(Hex); K19(Dimethyl)	ETciD	0.413079	1	0	1	1	Light	5.49513				2	31.038	4	561.798	2244.17	0.0545753	66.0889
EDVTPGAPVLRVTASDRDK	Cadherin EGF LAG seven-pass G-type receptor 2 OS=Homo sapiens GN=CELSR2 PE=2 SV=1 - [CELR2_HUMAN]	Q9HCU4	N-Term(Dimethyl); T13(Hex); K19(Dimethyl)	ETciD	0.297831	1	0	1	1	Light	4.35537				2	5.72919	3	748.729	2244.17	0.0877641	66.3105
EDVTPGAPVLRVTASDR	Cadherin EGF LAG seven-pass G-type receptor 2 OS=Homo sapiens GN=CELSR2 PE=2 SV=1 - [CELR2_HUMAN]	Q9HCU4	N-Term(Dimethyl); T13(Hex)	ETciD	0.278664	1	0	1	1	Light	3.51532				1	38.3834	3	658.344	1973.02	-0.53878	71.9601
VTASDRDKGSNAVVHY	Cadherin EGF LAG seven-pass G-type receptor 2 OS=Homo sapiens GN=CELSR2 PE=2 SV=1 - [CELR2_HUMAN]	Q9HCU4	N-Term(Dimethyl); T2(Hex); K8(Dimethyl)	ETciD	0.763006	1	0	1	1	Light	6.20035				2	5.72387	4	484.996	1936.96	0.102799	47.6315
VTASDRDKGSNAVVHY	Cadherin EGF LAG seven-pass G-type receptor 2 OS=Homo sapiens GN=CELSR2 PE=2 SV=1 - [CELR2_HUMAN]	Q9HCU4	N-Term(Dimethyl); T2(Hex); K8(Dimethyl)	ETciD	0.490323	1	0	1	1	Light	4.96652				2	38.3343	3	646.325	1936.96	-0.70954	47.641
EDVTPGAPVLRVTASDR	Cadherin EGF LAG seven-pass G-type receptor 2 OS=Homo sapiens GN=CELSR2 PE=2 SV=1 - [CELR2_HUMAN]	Q9HCU4	N-Term(Dimethyl); T13(Hex)	HCD	0.278664	1	0	1	1	Light		264.567	1.62104e-24	3.49363e-27	1	38.3834	3	658.344	1973.02	-0.53878	71.9729
STTAAVFLSVEDDNDNAPQFSEKR	Cadherin EGF LAG seven-pass G-type receptor 2 OS=Homo sapiens GN=CELSR2 PE=2 SV=1 - [CELR2_HUMAN]	Q9HCU4	N-Term(Dimethyl); S9(Hex); S21(Hex); K23(Dimethyl)	HCD	0.816933	1	0	1	1	Light		403.542	2.75175e-38	4.42403e-41	1	30.6027	3	1007.81	3021.41	-0.0269274	92.3682
LNEDAAVGTSVVTVSAVDR	Cadherin EGF LAG seven-pass G-type receptor 2 OS=Homo sapiens GN=CELSR2 PE=2 SV=1 - [CELR2_HUMAN]	Q9HCU4	N-Term(Dimethyl); T13(Hex); S15(Hex)	HCD	0.877153	1	0	1	1	Light		1163.71	2.66677e-114	4.26001e-117	0	0	2	1128.06	2255.11	0.242166	81.3058
LNEDAAVGTSVVTVSAVDR	Cadherin EGF LAG seven-pass G-type receptor 2 OS=Homo sapiens GN=CELSR2 PE=2 SV=1 - [CELR2_HUMAN]	Q9HCU4	N-Term(Dimethyl); S10(Hex); T13(Hex)	HCD	0.909233	1	0	1	1	Light		342.049	3.91175e-32	6.23883e-35	0	37.1508	3	752.376	2255.11	0.155007	81.3552
LNEDAAVGTSVVTVSAVDRDAH	Cadherin EGF LAG seven-pass G-type receptor 2 OS=Homo sapiens GN=CELSR2 PE=2 SV=1 - [CELR2_HUMAN]	Q9HCU4	N-Term(Dimethyl); T9(Hex); S15(Hex)	HCD	0.685151	1	0	1	1	Light		1033.18	5.2855e-100	4.80981e-104	1	25.8418	3	860.084	2578.24	-0.0988863	77.2847
STTAAVFLSVEDDNDNAPQFSEK	Cadherin EGF LAG seven-pass G-type receptor 2 OS=Homo sapiens GN=CELSR2 PE=2 SV=1 - [CELR2_HUMAN]	Q9HCU4	N-Term(Dimethyl:2H(4)); T3(Hex); S9(Hex); K23(Dimethyl:2H(4))	HCD	0.88778	1	0	1	1	Medium		295.877	1.52198e-27	2.58401e-30	0	83.2159	3	958.457	2873.36	0.12131	103.703
STTAAVFLSVEDDNDNAPQFSEK	Cadherin EGF LAG seven-pass G-type receptor 2 OS=Homo sapiens GN=CELSR2 PE=2 SV=1 - [CELR2_HUMAN]	Q9HCU4	N-Term(Dimethyl:2H(4)); S1(Hex); T3(Hex); K23(Dimethyl:2H(4))	HCD	1.68073	1	0	1	1	Medium		317.988	9.56818e-30	1.5894e-32	0	41.588	3	958.458	2873.36	1.20464	104.108
ATDADDPTYGNSAR	Cadherin-12 OS=Homo sapiens GN=CDH12 PE=1 SV=2 - [CAD12_HUMAN]	P55289	N-Term(Dimethyl); T8(Hex)	ETciD	0.321449	1	0	1	1	Light	1.60762				0	30.8787	2	822.355	1643.7	-0.595767	42.4015
ATDADDPTYGNSAR	Cadherin-12 OS=Homo sapiens GN=CDH12 PE=1 SV=2 - [CAD12_HUMAN]	P55289	N-Term(Dimethyl); T8(Hex)	HCD	0.321449	1	0	1	1	Light		449.503	1.10993e-43	1.12114e-45	0	30.8787	2	822.355	1643.7	-0.595767	42.4126
ATDADDPTYGNSAR	Cadherin-12 OS=Homo sapiens GN=CDH12 PE=1 SV=2 - [CAD12_HUMAN]	P55289	N-Term(Dimethyl:2H(4)); T8(Hex)	HCD	0.377126	1	0	1	1	Medium		269.667	8.96216e-26	1.07978e-27	0	51.6972	2	824.367	1647.73	-0.644433	42.1395
EGPYIGHVMEGSPTGTTVMR	Cadherin-13 OS=Homo sapiens GN=CDH13 PE=1 SV=1 - [CAD13_HUMAN]	P55290	N-Term(Dimethyl:2H(4)); T17(Hex)	ETciD	1.08524	1	0	1	1	Medium	4.69165				0	45.878	3	771.706	2313.1	-0.257054	80.2115
EGPYIGHVMEGSPTGTTVMR	Cadherin-13 OS=Homo sapiens GN=CDH13 PE=1 SV=1 - [CAD13_HUMAN]	P55290	N-Term(Dimethyl); T16(Hex)	HCD	1.08524	1	0	1	1	Light		692.593	3.18723e-67	5.50472e-70	0	40.4763	3	770.365	2309.08	0.888436	80.2688
IIRQEEGLHAGTMLTTFTAQDPDR	Cadherin-2 OS=Homo sapiens GN=CDH2 PE=1 SV=4 - [CADH2_HUMAN]	P19022	N-Term(Dimethyl); M13(Oxidation); T18(Hex)	ETciD	2.72964	1	0	1	1	Light	6.33378				1	58.8333	4	727.361	2906.42	0.471093	78.3581
IIRQEEGLHAGTMLTTFTAQDPDRYMQQNIR	Cadherin-2 OS=Homo sapiens GN=CDH2 PE=1 SV=4 - [CADH2_HUMAN]	P19022	N-Term(Dimethyl); M13(Oxidation); T18(Hex); M26(Oxidation)	ETciD	0.965005	1	0	1	1	Light	8.61658				2	9.41949	5	771.979	3855.86	0.213232	85.2905
IIRQEEGLHAGTMLTTFTAQDPDR	Cadherin-2 OS=Homo sapiens GN=CDH2 PE=1 SV=4 - [CADH2_HUMAN]	P19022	N-Term(Dimethyl); T18(Hex)	ETciD	1.02603	1	0	1	1	Light	7.26406				1	21.8535	4	723.362	2890.43	-0.0185771	92.8611
IIRQEEGLHAGTMLTTFTAQDPDRYMQQNIR	Cadherin-2 OS=Homo sapiens GN=CDH2 PE=1 SV=4 - [CADH2_HUMAN]	P19022	N-Term(Dimethyl); M13(Oxidation); T18(Hex)	ETciD	0.886093	1	0	1	1	Light	7.56787				2	2.53711	5	768.78	3839.87	-0.0928563	95.2662
IIRQEEGLHAGTMLTTFTAQDPDRYMQQNIR	Cadherin-2 OS=Homo sapiens GN=CDH2 PE=1 SV=4 - [CADH2_HUMAN]	P19022	N-Term(Dimethyl); M13(Oxidation); T18(Hex)	ETciD	0.709669	1	0	1	1	Light	7.15946				2	29.2579	5	768.78	3839.87	0.86085	95.754
IIRQEEGLHAGTMLTTFTAQDPDRYMQQNIR	Cadherin-2 OS=Homo sapiens GN=CDH2 PE=1 SV=4 - [CADH2_HUMAN]	P19022	N-Term(Dimethyl); M13(Oxidation); T18(Hex)	ETciD	0.553536	1	0	1	1	Light	11.4743				2	18.6805	5	768.779	3839.87	-0.410759	96.2291
GIQHPPQSTATVSVTVIDVNENPYFAPNPK	Cadherin-2 OS=Homo sapiens GN=CDH2 PE=1 SV=4 - [CADH2_HUMAN]	P19022	N-Term(Dimethyl); T9(Hex); T11(Hex); S13(Hex); T15(Hex); K30(Dimethyl)	ETciD	1.29503	1	0	1	1	Light	6.125				0	12.818	4	981.982	3924.9	0.728224	96.8252
GIQHPPQSTATVSVTVIDVNENPYFAPNPK	Cadherin-2 OS=Homo sapiens GN=CDH2 PE=1 SV=4 - [CADH2_HUMAN]	P19022	N-Term(Dimethyl); T9(Hex); T11(Hex); S13(Hex); T15(Hex); K30(Dimethyl)	ETciD	0.876939	1	0	1	1	Light	6.64219				0	21.9513	5	785.787	3924.91	1.06691	97.2044
GIQHPPQSTATVSVTVIDVNENPYFAPNPK	Cadherin-2 OS=Homo sapiens GN=CDH2 PE=1 SV=4 - [CADH2_HUMAN]	P19022	N-Term(Dimethyl); T9(Hex); T11(Hex); S13(Hex); T15(Hex); K30(Dimethyl)	ETciD	0.971446	1	0	1	1	Light	6.69306				0	0.607387	4	981.983	3924.91	1.91008	97.2669
GIQHPPQSTATVSVTVIDVNENPYFAPNPK	Cadherin-2 OS=Homo sapiens GN=CDH2 PE=1 SV=4 - [CADH2_HUMAN]	P19022	N-Term(Dimethyl); T9(Hex); T11(Hex); S13(Hex); T15(Hex); K30(Dimethyl)	ETciD	0.949669	1	0	1	1	Light	4.39164				0	0.476524	3	1308.97	3924.9	0.716099	97.2713
IIRQEEGLHAGTMLTTFTAQDPDRYMQQNIR	Cadherin-2 OS=Homo sapiens GN=CDH2 PE=1 SV=4 - [CADH2_HUMAN]	P19022	N-Term(Dimethyl); T18(Hex); M26(Oxidation)	ETciD	0.605147	1	0	1	1	Light	6.28202				2	30.6869	5	768.78	3839.87	-0.0133807	97.2898
GIQHPPQSTATVSVTVIDVNENPYFAPNPK	Cadherin-2 OS=Homo sapiens GN=CDH2 PE=1 SV=4 - [CADH2_HUMAN]	P19022	N-Term(Dimethyl); T9(Hex); T11(Hex); S13(Hex); T15(Hex); K30(Dimethyl)	ETciD	0.727349	1	0	1	1	Light	4.65876				0	2.5296	3	1308.97	3924.9	0.529491	97.7876
IIRQEEGLHAGTMLTTFTAQDPDRYMQQNIR	Cadherin-2 OS=Homo sapiens GN=CDH2 PE=1 SV=4 - [CADH2_HUMAN]	P19022	N-Term(Dimethyl); T18(Hex); M26(Oxidation)	ETciD	0.551947	1	0	1	1	Light	9.21784				2	19.8588	5	768.78	3839.87	-0.0133807	97.792
GIQHPPQSTATVSVTVIDVNENPYFAPNPK	Cadherin-2 OS=Homo sapiens GN=CDH2 PE=1 SV=4 - [CADH2_HUMAN]	P19022	N-Term(Dimethyl); T9(Hex); T11(Hex); S13(Hex); K30(Dimethyl)	ETciD	1.10861	1	0	1	1	Light	3.92804				0	5.47167	3	1254.96	3762.85	0.86808	100.019
GIQHPPQSTATVSVTVIDVNENPYFAPNPK	Cadherin-2 OS=Homo sapiens GN=CDH2 PE=1 SV=4 - [CADH2_HUMAN]	P19022	N-Term(Dimethyl); T9(Hex); T11(Hex); S13(Hex); K30(Dimethyl)	ETciD	1.00721	1	0	1	1	Light	4.92764				0	10.1453	3	1254.96	3762.85	1.35469	100.403
GIQHPPQSTATVSVTVIDVNENPYFAPNPK	Cadherin-2 OS=Homo sapiens GN=CDH2 PE=1 SV=4 - [CADH2_HUMAN]	P19022	N-Term(Dimethyl); T9(Hex); T11(Hex); S13(Hex); K30(Dimethyl)	ETciD	1.1944	1	0	1	1	Light	7.21814				0	4.16502	4	941.468	3762.85	0.134587	100.671
IIRQEEGLHAGTMLTTFTAQDPDRYMQQNIR	Cadherin-2 OS=Homo sapiens GN=CDH2 PE=1 SV=4 - [CADH2_HUMAN]	P19022	N-Term(Dimethyl); T18(Hex)	ETciD	0.518685	1	0	1	1	Light	9.06395				2	10.4439	5	765.581	3823.87	-0.162081	105.398
IIRQEEGLHAGTMLTTFTAQDPDRYMQQNIR	Cadherin-2 OS=Homo sapiens GN=CDH2 PE=1 SV=4 - [CADH2_HUMAN]	P19022	N-Term(Dimethyl); T16(Hex)	ETciD	0.430917	1	0	1	1	Light	3.26496				2	15.5766	4	956.727	3823.89	2.82625	106.046
IIRQEEGLHAGTMLTTFTAQDPDRYMQQNIR	Cadherin-2 OS=Homo sapiens GN=CDH2 PE=1 SV=4 - [CADH2_HUMAN]	P19022	N-Term(Dimethyl); T18(Hex)	ETciD	0.735332	1	0	1	1	Light	10.9885				2	0.198002	5	765.581	3823.88	0.715806	106.322
IIRQEEGLHAGTMLTTFTAQDPDRYMQQNIR	Cadherin-2 OS=Homo sapiens GN=CDH2 PE=1 SV=4 - [CADH2_HUMAN]	P19022	N-Term(Dimethyl); T18(Hex)	ETciD	0.522951	1	0	1	1	Light	10.0261				2	0.891747	5	765.581	3823.87	0.157151	106.713
IIRQEEGLHAGTMLTTFTAQDPDRYMQQNIR	Cadherin-2 OS=Homo sapiens GN=CDH2 PE=1 SV=4 - [CADH2_HUMAN]	P19022	N-Term(Dimethyl); T18(Hex)	ETciD	0.567938	1	0	1	1	Light	10.0488				2	3.84181	5	765.581	3823.87	-0.00246535	107.129
IIRQEEGLHAGTMLTTFTAQDPDRYMQQNIR	Cadherin-2 OS=Homo sapiens GN=CDH2 PE=1 SV=4 - [CADH2_HUMAN]	P19022	N-Term(Dimethyl); M13(Oxidation); T18(Hex); M26(Oxidation)	ETciD	0.534248	1	0	1	1	Light	5.98595				2	50.0726	5	771.979	3855.87	0.608961	98.9618
GIQHPPQSTATVSVTVIDVNENPYFAPNPK	Cadherin-2 OS=Homo sapiens GN=CDH2 PE=1 SV=4 - [CADH2_HUMAN]	P19022	N-Term(Dimethyl); T9(Hex); T11(Hex); S13(Hex); T15(Hex); K30(Dimethyl)	ETciD	1.07276	1	0	1	1	Light	3.81264				0	3.61102	4	981.981	3924.9	0.355007	102.093
GIQHPPQSTATVSVTVIDVNENPYFAPNPK	Cadherin-2 OS=Homo sapiens GN=CDH2 PE=1 SV=4 - [CADH2_HUMAN]	P19022	N-Term(Dimethyl); T9(Hex); T11(Hex); S13(Hex); T15(Hex); K30(Dimethyl)	ETciD	1.03793	1	0	1	1	Light	4.29489				0	2.12844	3	1308.97	3924.9	0.529491	102.51
IIRQEEGLHAGTMLTTFTAQDPDR	Cadherin-2 OS=Homo sapiens GN=CDH2 PE=1 SV=4 - [CADH2_HUMAN]	P19022	N-Term(Dimethyl); T18(Hex)	ETciD	1.15313	1	0	1	1	Light	5.18788				1	51.6964	4	723.362	2890.42	-0.356438	102.543
GIQHPPQSTATVSVTVIDVNENPYFAPNPK	Cadherin-2 OS=Homo sapiens GN=CDH2 PE=1 SV=4 - [CADH2_HUMAN]	P19022	N-Term(Dimethyl); T9(Hex); T11(Hex); S13(Hex); T15(Hex); K30(Dimethyl)	ETciD	0.800632	1	0	1	1	Light	5.95089				0	0.970954	4	981.981	3924.9	0.603818	102.893
GIQHPPQSTATVSVTVIDVNENPYFAPNPK	Cadherin-2 OS=Homo sapiens GN=CDH2 PE=1 SV=4 - [CADH2_HUMAN]	P19022	N-Term(Dimethyl); T9(Hex); T11(Hex); S13(Hex); T15(Hex); K30(Dimethyl)	ETciD	0.934669	1	0	1	1	Light	6.08253				0	2.19479	4	981.981	3924.9	0.355007	103.32
GIQHPPQSTATVSVTVIDVNENPYFAPNPK	Cadherin-2 OS=Homo sapiens GN=CDH2 PE=1 SV=4 - [CADH2_HUMAN]	P19022	N-Term(Dimethyl); T9(Hex); T11(Hex); S13(Hex); K30(Dimethyl)	ETciD	0.975677	1	0	1	1	Light	6.70857				0	4.8324	4	941.468	3762.85	0.394114	105.458
IIRQEEGLHAGTMLTTFTAQDPDRYMQQNIR	Cadherin-2 OS=Homo sapiens GN=CDH2 PE=1 SV=4 - [CADH2_HUMAN]	P19022	N-Term(Dimethyl); M13(Oxidation); T18(Hex); M26(Oxidation)	ETciD	0.772039	1	0	1	1	Light	8.94677				2	42.1922	5	771.979	3855.86	-0.0242056	105.925
IIRQEEGLHAGTMLTTFTAQDPDRYMQQNIR	Cadherin-2 OS=Homo sapiens GN=CDH2 PE=1 SV=4 - [CADH2_HUMAN]	P19022	N-Term(Dimethyl); T18(Hex); M26(Oxidation)	ETciD	0.619858	1	0	1	1	Light	10.6527				2	22.0872	5	768.78	3839.87	0.463472	106.28
GIQHPPQSTATVSVTVIDVNENPYFAPNPK	Cadherin-2 OS=Homo sapiens GN=CDH2 PE=1 SV=4 - [CADH2_HUMAN]	P19022	N-Term(Dimethyl); T9(Hex); T11(Hex); S13(Hex); K30(Dimethyl)	ETciD	0.947692	1	0	1	1	Light	6.21569				0	12.5195	4	941.469	3762.85	1.36734	106.828
IIRQEEGLHAGTMLTTFTAQDPDR	Cadherin-2 OS=Homo sapiens GN=CDH2 PE=1 SV=4 - [CADH2_HUMAN]	P19022	N-Term(Dimethyl); T18(Hex)	ETciD	0.538718	1	0	1	1	Light	7.22145				1	40.6413	4	723.362	2890.43	0.403749	106.89
GIQHPPQSTATVSVTVIDVNENPYFAPNPK	Cadherin-2 OS=Homo sapiens GN=CDH2 PE=1 SV=4 - [CADH2_HUMAN]	P19022	N-Term(Dimethyl); T9(Hex); T11(Hex); S13(Hex); K30(Dimethyl)	ETciD	1.22617	1	0	1	1	Light	2.97358				0	0	3	1254.96	3762.87	5.15026	107.012
IIRQEEGLHAGTMLTTFTAQDPDRYMQQNIR	Cadherin-2 OS=Homo sapiens GN=CDH2 PE=1 SV=4 - [CADH2_HUMAN]	P19022	N-Term(Dimethyl); M13(Oxidation); T18(Hex)	ETciD	0.412054	1	0	1	1	Light	9.03298				2	31.5662	5	768.78	3839.87	0.940325	107.041
GIQHPPQSTATVSVTVIDVNENPYFAPNPK	Cadherin-2 OS=Homo sapiens GN=CDH2 PE=1 SV=4 - [CADH2_HUMAN]	P19022	N-Term(Dimethyl); T9(Hex); T11(Hex); T15(Hex); K30(Dimethyl)	ETciD	0.573911	1	0	1	1	Light	4.18019				0	5.17565	4	941.469	3762.85	1.43222	107.191
GIQHPPQSTATVSVTVIDVNENPYFAPNPK	Cadherin-2 OS=Homo sapiens GN=CDH2 PE=1 SV=4 - [CADH2_HUMAN]	P19022	N-Term(Dimethyl); T9(Hex); T11(Hex); S13(Hex); K30(Dimethyl)	ETciD	1.36017	1	0	1	1	Light	3.23799				0	10.4645	3	1254.95	3762.85	0.47879	107.462
IIRQEEGLHAGTMLTTFTAQDPDRYMQQNIR	Cadherin-2 OS=Homo sapiens GN=CDH2 PE=1 SV=4 - [CADH2_HUMAN]	P19022	N-Term(Dimethyl); T18(Hex)	ETciD	0.64437	1	0	1	1	Light	11.0223				2	25.8938	5	765.581	3823.87	-0.241889	107.693
GIQHPPQSTATVSVTVIDVNENPYFAPNPK	Cadherin-2 OS=Homo sapiens GN=CDH2 PE=1 SV=4 - [CADH2_HUMAN]	P19022	N-Term(Dimethyl); T9(Hex); T11(Hex); S13(Hex); K30(Dimethyl)	ETciD	1.0586	1	0	1	1	Light	5.19996				0	4.41542	3	1254.95	3762.85	-0.397115	107.606
QEEGLHAGTMLTTFTAQDPDR	Cadherin-2 OS=Homo sapiens GN=CDH2 PE=1 SV=4 - [CADH2_HUMAN]	P19022	N-Term(Dimethyl:2H(4)); M10(Oxidation); T15(Hex)	ETciD	3.21954	1	0	1	1	Medium	5.04818				0	38.9658	3	843.397	2528.18	0.2138	77.4406
IIRQEEGLHAGTMLTTFTAQDPDR	Cadherin-2 OS=Homo sapiens GN=CDH2 PE=1 SV=4 - [CADH2_HUMAN]	P19022	N-Term(Dimethyl:2H(4)); M13(Oxidation); T18(Hex)	ETciD	1.04238	1	0	1	1	Medium	8.74197				1	45.9111	4	728.366	2910.44	-1.44533	77.805
QEEGLHAGTMLTTFTAQDPDR	Cadherin-2 OS=Homo sapiens GN=CDH2 PE=1 SV=4 - [CADH2_HUMAN]	P19022	N-Term(Dimethyl:2H(4)); M10(Oxidation); T15(Hex)	ETciD	3.28499	1	0	1	1	Medium	6.46639				0	18.5718	3	843.396	2528.17	-0.438033	77.8385
IIRQEEGLHAGTMLTTFTAQDPDR	Cadherin-2 OS=Homo sapiens GN=CDH2 PE=1 SV=4 - [CADH2_HUMAN]	P19022	N-Term(Dimethyl:2H(4)); T18(Hex)	ETciD	1.07034	1	0	1	1	Medium	7.51762				1	38.7329	4	724.367	2894.45	-1.27013	91.2057
QEEGLHAGTMLTTFTAQDPDR	Cadherin-2 OS=Homo sapiens GN=CDH2 PE=1 SV=4 - [CADH2_HUMAN]	P19022	N-Term(Dimethyl:2H(4)); T15(Hex)	ETciD	3.44706	1	0	1	1	Medium	4.7316				0	19.2294	3	838.065	2512.18	-0.181165	92.4472
QEEGLHAGTMLTTFTAQDPDRYMQQNIR	Cadherin-2 OS=Homo sapiens GN=CDH2 PE=1 SV=4 - [CADH2_HUMAN]	P19022	N-Term(Dimethyl:2H(4)); M10(Oxidation); T15(Hex)	ETciD	6.95028	1	0	1	1	Medium	6.31776				1	36.2892	4	866.16	3461.62	-2.03506	94.8802
GIQHPPQSTATVSVTVIDVNENPYFAPNPK	Cadherin-2 OS=Homo sapiens GN=CDH2 PE=1 SV=4 - [CADH2_HUMAN]	P19022	N-Term(Dimethyl:2H(4)); T9(Hex); T11(Hex); S13(Hex); T15(Hex); K30(Dimethyl:2H(4))	ETciD	1.30544	1	0	1	1	Medium	4.25774				0	3.71243	3	1311.66	3932.95	0.20707	96.9533
GIQHPPQSTATVSVTVIDVNENPYFAPNPK	Cadherin-2 OS=Homo sapiens GN=CDH2 PE=1 SV=4 - [CADH2_HUMAN]	P19022	N-Term(Dimethyl:2H(4)); T9(Hex); T11(Hex); S13(Hex); K30(Dimethyl:2H(4))	ETciD	1.22324	1	0	1	1	Medium	6.60421				0	32.0011	4	943.481	3770.9	0.414214	97.2478
GIQHPPQSTATVSVTVIDVNENPYFAPNPK	Cadherin-2 OS=Homo sapiens GN=CDH2 PE=1 SV=4 - [CADH2_HUMAN]	P19022	N-Term(Dimethyl:2H(4)); T9(Hex); T11(Hex); S13(Hex); K30(Dimethyl:2H(4))	ETciD	0.982959	1	0	1	1	Medium	3.39678				0	18.0213	3	1257.64	3770.9	1.59934	99.6413
GIQHPPQSTATVSVTVIDVNENPYFAPNPK	Cadherin-2 OS=Homo sapiens GN=CDH2 PE=1 SV=4 - [CADH2_HUMAN]	P19022	N-Term(Dimethyl:2H(4)); T9(Hex); T11(Hex); S13(Hex); K30(Dimethyl:2H(4))	ETciD	1.14274	1	0	1	1	Medium	5.79333				0	19.8522	4	943.48	3770.9	0.349471	99.6718
GIQHPPQSTATVSVTVIDVNENPYFAPNPK	Cadherin-2 OS=Homo sapiens GN=CDH2 PE=1 SV=4 - [CADH2_HUMAN]	P19022	N-Term(Dimethyl:2H(4)); T9(Hex); T11(Hex); S13(Hex); K30(Dimethyl:2H(4))	ETciD	1.16392	1	0	1	1	Medium	6.6739				0	10.5981	4	943.48	3770.9	0.284728	100.06
GIQHPPQSTATVSVTVIDVNENPYFAPNPK	Cadherin-2 OS=Homo sapiens GN=CDH2 PE=1 SV=4 - [CADH2_HUMAN]	P19022	N-Term(Dimethyl:2H(4)); T9(Hex); T11(Hex); S13(Hex); K30(Dimethyl:2H(4))	ETciD	0.864551	1	0	1	1	Medium	6.06313				0	6.50818	4	943.48	3770.9	0.155241	100.44
QEEGLHAGTMLTTFTAQDPDRYMQQNIR	Cadherin-2 OS=Homo sapiens GN=CDH2 PE=1 SV=4 - [CADH2_HUMAN]	P19022	N-Term(Dimethyl:2H(4)); T13(Hex)	ETciD	2.69805	0.3686	0	1	1	Medium	5.48003				1	43.0262	4	862.161	3445.62	-2.81174	106.543
QEEGLHAGTMLTTFTAQDPDRYMQQNIR	Cadherin-2 OS=Homo sapiens GN=CDH2 PE=1 SV=4 - [CADH2_HUMAN]	P19022	N-Term(Dimethyl:2H(4)); T15(Hex)	ETciD	1.41673	0.445	0	1	1	Medium	7.3684				1	38.5189	4	862.161	3445.62	-1.89062	107.421
QEEGLHAGTMLTTFTAQDPDR	Cadherin-2 OS=Homo sapiens GN=CDH2 PE=1 SV=4 - [CADH2_HUMAN]	P19022	N-Term(Dimethyl:2H(4)); M10(Oxidation); T15(Hex)	ETciD	2.85612	1	0	1	1	Medium	5.97943				0	22.1673	3	843.396	2528.17	-0.582885	80.5011
QEEGLHAGTMLTTFTAQDPDR	Cadherin-2 OS=Homo sapiens GN=CDH2 PE=1 SV=4 - [CADH2_HUMAN]	P19022	N-Term(Dimethyl:2H(4)); T15(Hex)	ETciD	2.41149	1	0	1	1	Medium	4.52943				0	13.9688	3	838.065	2512.18	-0.764262	94.2126
QEEGLHAGTMLTTFTAQDPDR	Cadherin-2 OS=Homo sapiens GN=CDH2 PE=1 SV=4 - [CADH2_HUMAN]	P19022	N-Term(Dimethyl:2H(4)); T15(Hex)	ETciD	2.51718	1	0	1	1	Medium	4.55646				0	21.0025	3	838.065	2512.18	-0.32694	96.2212
QEEGLHAGTMLTTFTAQDPDR	Cadherin-2 OS=Homo sapiens GN=CDH2 PE=1 SV=4 - [CADH2_HUMAN]	P19022	N-Term(Dimethyl:2H(4)); T15(Hex)	ETciD	3.05217	1	0	1	1	Medium	4.96127				0	18.3823	3	838.065	2512.18	-0.254053	97.7455
QEEGLHAGTMLTTFTAQDPDR	Cadherin-2 OS=Homo sapiens GN=CDH2 PE=1 SV=4 - [CADH2_HUMAN]	P19022	N-Term(Dimethyl:2H(4)); T15(Hex)	ETciD	3.06709	1	0	1	1	Medium	5.21508				0	18.702	3	838.065	2512.18	-0.254053	98.1616
QEEGLHAGTMLTTFTAQDPDR	Cadherin-2 OS=Homo sapiens GN=CDH2 PE=1 SV=4 - [CADH2_HUMAN]	P19022	N-Term(Dimethyl:2H(4)); T15(Hex)	ETciD	5.67341	1	0	1	1	Medium	3.63019				0	25.8594	3	838.065	2512.18	-0.545601	101.957
QEEGLHAGTMLTTFTAQDPDRYMQQNIR	Cadherin-2 OS=Homo sapiens GN=CDH2 PE=1 SV=4 - [CADH2_HUMAN]	P19022	N-Term(Dimethyl:2H(4)); M10(Oxidation); T15(Hex)	ETciD	1.25059	1	0	1	1	Medium	3.3084				1	35.953	4	866.162	3461.63	0.0102484	102.461
GIQHPPQSTATVSVTVIDVNENPYFAPNPK	Cadherin-2 OS=Homo sapiens GN=CDH2 PE=1 SV=4 - [CADH2_HUMAN]	P19022	N-Term(Dimethyl:2H(4)); T9(Hex); T11(Hex); S13(Hex); T15(Hex); K30(Dimethyl:2H(4))	ETciD	0.973208	1	0	1	1	Medium	4.68637				0	2.5514	3	1311.66	3932.95	0.300183	102.987
GIQHPPQSTATVSVTVIDVNENPYFAPNPK	Cadherin-2 OS=Homo sapiens GN=CDH2 PE=1 SV=4 - [CADH2_HUMAN]	P19022	N-Term(Dimethyl:2H(4)); T9(Hex); T11(Hex); S13(Hex); T15(Hex); K30(Dimethyl:2H(4))	ETciD	0.95415	1	0	1	1	Medium	5.07233				0	9.67987	4	983.994	3932.95	0.250208	103.058
QEEGLHAGTMLTTFTAQDPDRYMQQNIR	Cadherin-2 OS=Homo sapiens GN=CDH2 PE=1 SV=4 - [CADH2_HUMAN]	P19022	N-Term(Dimethyl:2H(4)); T15(Hex); M23(Oxidation)	ETciD	1.71123	1	0	1	1	Medium	6.47189				1	37.3625	4	866.16	3461.62	-1.47084	103.672
GIQHPPQSTATVSVTVIDVNENPYFAPNPK	Cadherin-2 OS=Homo sapiens GN=CDH2 PE=1 SV=4 - [CADH2_HUMAN]	P19022	N-Term(Dimethyl:2H(4)); T9(Hex); T11(Hex); S13(Hex); T15(Hex); K30(Dimethyl:2H(4))	ETciD	90.97	1	0	1	1	Medium	4.04143				0	9.21801	4	983.994	3932.95	0.622661	104.111
GIQHPPQSTATVSVTVIDVNENPYFAPNPK	Cadherin-2 OS=Homo sapiens GN=CDH2 PE=1 SV=4 - [CADH2_HUMAN]	P19022	N-Term(Dimethyl:2H(4)); T9(Hex); T11(Hex); S13(Hex); K30(Dimethyl:2H(4))	ETciD	0.960576	1	0	1	1	Medium	6.13297				0	35.1336	4	943.48	3770.9	-0.103732	105.283
GIQHPPQSTATVSVTVIDVNENPYFAPNPK	Cadherin-2 OS=Homo sapiens GN=CDH2 PE=1 SV=4 - [CADH2_HUMAN]	P19022	N-Term(Dimethyl:2H(4)); T9(Hex); T11(Hex); S13(Hex); K30(Dimethyl:2H(4))	ETciD	1.02601	1	0	1	1	Medium	2.50083				0	6.02574	3	1257.64	3770.9	0.822426	105.354
GIQHPPQSTATVSVTVIDVNENPYFAPNPK	Cadherin-2 OS=Homo sapiens GN=CDH2 PE=1 SV=4 - [CADH2_HUMAN]	P19022	N-Term(Dimethyl:2H(4)); T9(Hex); T11(Hex); S13(Hex); K30(Dimethyl:2H(4))	ETciD	1.1493	1	0	1	1	Medium	3.68785				0	13.8978	4	943.48	3770.9	0.155241	105.698
GIQHPPQSTATVSVTVIDVNENPYFAPNPK	Cadherin-2 OS=Homo sapiens GN=CDH2 PE=1 SV=4 - [CADH2_HUMAN]	P19022	N-Term(Dimethyl:2H(4)); T9(Hex); T11(Hex); S13(Hex); K30(Dimethyl:2H(4))	ETciD	1.11331	1	0	1	1	Medium	6.39816				0	46.7931	4	943.479	3770.9	-0.81591	106.189
GIQHPPQSTATVSVTVIDVNENPYFAPNPK	Cadherin-2 OS=Homo sapiens GN=CDH2 PE=1 SV=4 - [CADH2_HUMAN]	P19022	N-Term(Dimethyl:2H(4)); T9(Hex); T11(Hex); S13(Hex); K30(Dimethyl:2H(4))	ETciD	1.34263	1	0	1	1	Medium	4.43276				0	10.8235	4	943.484	3770.91	4.16931	107.002
QEEGLHAGTMLTTFTAQDPDR	Cadherin-2 OS=Homo sapiens GN=CDH2 PE=1 SV=4 - [CADH2_HUMAN]	P19022	N-Term(Dimethyl:2H(4)); T15(Hex)	ETciD	3.08978	1	0	1	1	Medium	5.40342				0	15.6897	3	838.065	2512.18	-0.108278	107.252
GIQHPPQSTATVSVTVIDVNENPYFAPNPK	Cadherin-2 OS=Homo sapiens GN=CDH2 PE=1 SV=4 - [CADH2_HUMAN]	P19022	N-Term(Dimethyl:2H(4)); T9(Hex); T11(Hex); S13(Hex); T15(Hex); K30(Dimethyl:2H(4))	ETciD	1.08304	1	0	1	1	Medium	4.59672				0	2.87749	3	1311.66	3932.95	0.300183	107.327
GIQHPPQSTATVSVTVIDVNENPYFAPNPK	Cadherin-2 OS=Homo sapiens GN=CDH2 PE=1 SV=4 - [CADH2_HUMAN]	P19022	N-Term(Dimethyl:2H(4)); T9(Hex); T11(Hex); S13(Hex); T15(Hex); K30(Dimethyl:2H(4))	ETciD	0.906941	1	0	1	1	Medium	2.9809				0	5.89117	4	983.994	3932.95	0.560586	107.37
GIQHPPQSTATVSVTVIDVNENPYFAPNPK	Cadherin-2 OS=Homo sapiens GN=CDH2 PE=1 SV=4 - [CADH2_HUMAN]	P19022	N-Term(Dimethyl:2H(4)); T9(Hex); T11(Hex); S13(Hex); K30(Dimethyl:2H(4))	ETciD	1.09269	1	0	1	1	Medium	4.42183				0	19.6225	4	943.48	3770.9	0.0257543	107.672
QEEGLHAGTMLTTFTAQDPDRYMQQNIR	Cadherin-2 OS=Homo sapiens GN=CDH2 PE=1 SV=4 - [CADH2_HUMAN]	P19022	N-Term(Dimethyl:2H(4)); T15(Hex); M23(Oxidation)	ETciD	1.1624	1	0	1	1	Medium	4.51209				1	35.8124	4	866.159	3461.61	-3.37509	107.799
TAQDPDRYMQQNIR	Cadherin-2 OS=Homo sapiens GN=CDH2 PE=1 SV=4 - [CADH2_HUMAN]	P19022	N-Term(Dimethyl:2H(4)); T1(Hex)	ETciD	2.0654	1	0	1	1	Medium	4.1179				1	52.5397	3	643.981	1929.93	0.695235	62.2803
LTTFTAQDPDRYMQQNIR	Cadherin-2 OS=Homo sapiens GN=CDH2 PE=1 SV=4 - [CADH2_HUMAN]	P19022	N-Term(Dimethyl:2H(4)); T5(Hex); M13(Oxidation)	ETciD	2.11722	1	0	1	1	Medium	3.0757				1	41.0009	3	803.394	2408.17	-0.595063	73.1232
TTFTAQDPDRYMQQNIR	Cadherin-2 OS=Homo sapiens GN=CDH2 PE=1 SV=4 - [CADH2_HUMAN]	P19022	N-Term(Dimethyl:2H(4)); T1(Hex)	ETciD	1.56871	1	0	1	1	Medium	3.55467				1	29.8814	3	760.368	2279.09	-1.00128	81.7363
TVTAIDADDPNALNGMLR	Cadherin-2 OS=Homo sapiens GN=CDH2 PE=1 SV=4 - [CADH2_HUMAN]	P19022	N-Term(Dimethyl:2H(4)); T3(Hex); M16(Oxidation)	ETciD	3.09605	1	0	1	1	Medium	3.41173				0	27.8131	3	699.682	2097.03	0.226742	84.6256
TVTAIDADDPNALNGMLR	Cadherin-2 OS=Homo sapiens GN=CDH2 PE=1 SV=4 - [CADH2_HUMAN]	P19022	N-Term(Dimethyl:2H(4)); T3(Hex); M16(Oxidation)	ETciD	3.02412	1	0	1	1	Medium	1.96336				0	12.2196	2	1049.02	2097.03	-0.523589	84.7177
LTTFTAQDPDRYMQQNIR	Cadherin-2 OS=Homo sapiens GN=CDH2 PE=1 SV=4 - [CADH2_HUMAN]	P19022	N-Term(Dimethyl:2H(4)); T5(Hex)	ETciD	2.4312	1	0	1	1	Medium	4.16757				1	25.5341	3	798.062	2392.17	-1.47451	88.6666
TVTAIDADDPNALNGMLR	Cadherin-2 OS=Homo sapiens GN=CDH2 PE=1 SV=4 - [CADH2_HUMAN]	P19022	N-Term(Dimethyl:2H(4)); T3(Hex)	ETciD	2.65305	1	0	1	1	Medium	3.64651				0	23.6979	3	694.351	2081.04	0.101998	102.367
TVTAIDADDPNALNGMLR	Cadherin-2 OS=Homo sapiens GN=CDH2 PE=1 SV=4 - [CADH2_HUMAN]	P19022	N-Term(Dimethyl:2H(4)); T3(Hex); M16(Oxidation)	ETciD	2.92752	1	0	1	1	Medium	2.04494				0	9.5766	2	1049.02	2097.03	-0.0579009	86.4419
TVTAIDADDPNALNGMLR	Cadherin-2 OS=Homo sapiens GN=CDH2 PE=1 SV=4 - [CADH2_HUMAN]	P19022	N-Term(Dimethyl:2H(4)); T3(Hex); M16(Oxidation)	ETciD	2.65161	1	0	1	1	Medium	4.27747				0	23.5147	3	699.682	2097.03	-0.209841	86.7157
LTTFTAQDPDRYMQQNIR	Cadherin-2 OS=Homo sapiens GN=CDH2 PE=1 SV=4 - [CADH2_HUMAN]	P19022	N-Term(Dimethyl:2H(4)); T5(Hex)	ETciD	2.26706	1	0	1	1	Medium	3.29843				1	44.4826	3	798.062	2392.17	-1.16834	90.8237
IIRQEEGLHAGTMLTTFTAQDPDR	Cadherin-2 OS=Homo sapiens GN=CDH2 PE=1 SV=4 - [CADH2_HUMAN]	P19022	N-Term(Dimethyl); M13(Oxidation); T15(Hex)	HCD	2.72964	1	0	1	1	Light		363.549	3.05609e-34	4.41631e-37	1	58.8333	4	727.361	2906.42	0.471093	78.3689
IIRQEEGLHAGTMLTTFTAQDPDR	Cadherin-2 OS=Homo sapiens GN=CDH2 PE=1 SV=4 - [CADH2_HUMAN]	P19022	N-Term(Dimethyl); T12(Hex)	HCD	1.02603	1	0	1	1	Light		388.135	9.44937e-37	1.53648e-39	1	21.8535	4	723.362	2890.43	-0.0185771	92.8736
IIRQEEGLHAGTMLTTFTAQDPDR	Cadherin-2 OS=Homo sapiens GN=CDH2 PE=1 SV=4 - [CADH2_HUMAN]	P19022	N-Term(Dimethyl); T12(Hex)	HCD	1.07034	1	0	1	1	Light		372.353	3.53702e-35	5.81747e-38	1	45.1318	4	723.362	2890.43	0.150354	91.366
GIQHPPQSTATVSVTVIDVNENPYFAPNPK	Cadherin-2 OS=Homo sapiens GN=CDH2 PE=1 SV=4 - [CADH2_HUMAN]	P19022	N-Term(Dimethyl); S8(Hex); T9(Hex); S13(Hex); T15(Hex); K30(Dimethyl)	HCD	1.29503	1	0	1	1	Light		552.41	4.1338e-53	5.74138e-56	0	12.818	4	981.982	3924.9	0.728224	96.8404
GIQHPPQSTATVSVTVIDVNENPYFAPNPK	Cadherin-2 OS=Homo sapiens GN=CDH2 PE=1 SV=4 - [CADH2_HUMAN]	P19022	N-Term(Dimethyl); T11(Hex); S13(Hex); T15(Hex); K30(Dimethyl)	HCD	1.38743	1	0	1	1	Light		236.729	1.48251e-21	2.12394e-24	0	14.0228	4	941.469	3762.86	1.88639	101.558
GIQHPPQSTATVSVTVIDVNENPYFAPNPK	Cadherin-2 OS=Homo sapiens GN=CDH2 PE=1 SV=4 - [CADH2_HUMAN]	P19022	N-Term(Dimethyl); S8(Hex); T9(Hex); S13(Hex); T15(Hex); K30(Dimethyl)	HCD	0.876939	1	0	1	1	Light		365.784	1.90058e-34	2.63969e-37	0	21.9513	5	785.787	3924.91	1.06691	97.2155
GIQHPPQSTATVSVTVIDVNENPYFAPNPK	Cadherin-2 OS=Homo sapiens GN=CDH2 PE=1 SV=4 - [CADH2_HUMAN]	P19022	N-Term(Dimethyl); S8(Hex); T9(Hex); S13(Hex); T15(Hex); K30(Dimethyl)	HCD	0.971446	1	0	1	1	Light		615.132	2.17517e-59	3.06794e-62	0	0.607387	4	981.983	3924.91	1.91008	97.2811
GIQHPPQSTATVSVTVIDVNENPYFAPNPK	Cadherin-2 OS=Homo sapiens GN=CDH2 PE=1 SV=4 - [CADH2_HUMAN]	P19022	N-Term(Dimethyl); S8(Hex); T9(Hex); S13(Hex); T15(Hex); K30(Dimethyl)	HCD	0.727349	1	0	1	1	Light		692.904	3.66875e-67	5.12395e-70	0	2.5296	3	1308.97	3924.9	0.529491	97.798
GIQHPPQSTATVSVTVIDVNENPYFAPNPK	Cadherin-2 OS=Homo sapiens GN=CDH2 PE=1 SV=4 - [CADH2_HUMAN]	P19022	N-Term(Dimethyl); S8(Hex); T9(Hex); T15(Hex); K30(Dimethyl)	HCD	1.10861	1	0	1	1	Light		705.465	2.01718e-68	2.8411e-71	0	5.47167	3	1254.96	3762.85	0.86808	100.03
GIQHPPQSTATVSVTVIDVNENPYFAPNPK	Cadherin-2 OS=Homo sapiens GN=CDH2 PE=1 SV=4 - [CADH2_HUMAN]	P19022	N-Term(Dimethyl); S8(Hex); T9(Hex); T15(Hex); K30(Dimethyl)	HCD	1.00721	1	0	1	1	Light		654.943	2.2269e-63	3.20417e-66	0	10.1453	3	1254.96	3762.85	1.35469	100.414
GIQHPPQSTATVSVTVIDVNENPYFAPNPK	Cadherin-2 OS=Homo sapiens GN=CDH2 PE=1 SV=4 - [CADH2_HUMAN]	P19022	N-Term(Dimethyl); S8(Hex); T9(Hex); T15(Hex); K30(Dimethyl)	HCD	1.1944	1	0	1	1	Light		511.61	4.79747e-49	6.90283e-52	0	4.16502	4	941.468	3762.85	0.134587	100.683
GIQHPPQSTATVSVTVIDVNENPYFAPNPK	Cadherin-2 OS=Homo sapiens GN=CDH2 PE=1 SV=4 - [CADH2_HUMAN]	P19022	N-Term(Dimethyl); S8(Hex); T9(Hex); S13(Hex); T15(Hex); K30(Dimethyl)	HCD	1.07276	1	0	1	1	Light		512.875	3.69337e-49	5.15834e-52	0	3.61102	4	981.981	3924.9	0.355007	102.104
GIQHPPQSTATVSVTVIDVNENPYFAPNPK	Cadherin-2 OS=Homo sapiens GN=CDH2 PE=1 SV=4 - [CADH2_HUMAN]	P19022	N-Term(Dimethyl); S8(Hex); T9(Hex); S13(Hex); T15(Hex); K30(Dimethyl)	HCD	0.934669	1	0	1	1	Light		712.864	3.70269e-69	5.17136e-72	0	2.19479	4	981.981	3924.9	0.355007	103.333
GIQHPPQSTATVSVTVIDVNENPYFAPNPK	Cadherin-2 OS=Homo sapiens GN=CDH2 PE=1 SV=4 - [CADH2_HUMAN]	P19022	N-Term(Dimethyl); S8(Hex); T9(Hex); S13(Hex); T15(Hex); K30(Dimethyl)	HCD	1.43239	1	0	1	1	Light		577.918	1.15806e-55	1.61514e-58	0	4.03371	3	1308.97	3924.9	0.249577	104.127
GIQHPPQSTATVSVTVIDVNENPYFAPNPK	Cadherin-2 OS=Homo sapiens GN=CDH2 PE=1 SV=4 - [CADH2_HUMAN]	P19022	N-Term(Dimethyl); S8(Hex); T9(Hex); S13(Hex); T15(Hex); K30(Dimethyl)	HCD	1.03793	1	0	1	1	Light		681.025	5.65505e-66	7.89812e-69	0	2.12844	3	1308.97	3924.9	0.529491	102.519
IIRQEEGLHAGTMLTTFTAQDPDR	Cadherin-2 OS=Homo sapiens GN=CDH2 PE=1 SV=4 - [CADH2_HUMAN]	P19022	N-Term(Dimethyl); T12(Hex)	HCD	1.15313	1	0	1	1	Light		355.865	1.66108e-33	2.59138e-36	1	51.6964	4	723.362	2890.42	-0.356438	102.556
GIQHPPQSTATVSVTVIDVNENPYFAPNPK	Cadherin-2 OS=Homo sapiens GN=CDH2 PE=1 SV=4 - [CADH2_HUMAN]	P19022	N-Term(Dimethyl); T9(Hex); T11(Hex); S13(Hex); T15(Hex); K30(Dimethyl)	HCD	2.59151	1	0	1	1	Light		326.97	1.43256e-30	2.0092e-33	0	19.4954	3	1308.97	3924.9	0.0629685	104.56
GIQHPPQSTATVSVTVIDVNENPYFAPNPK	Cadherin-2 OS=Homo sapiens GN=CDH2 PE=1 SV=4 - [CADH2_HUMAN]	P19022	N-Term(Dimethyl); S8(Hex); T9(Hex); T15(Hex); K30(Dimethyl)	HCD	0.960576	1	0	1	1	Light		326.072	1.7318e-30	2.47048e-33	0	72.361	4	941.467	3762.85	-0.189823	105.1
GIQHPPQSTATVSVTVIDVNENPYFAPNPK	Cadherin-2 OS=Homo sapiens GN=CDH2 PE=1 SV=4 - [CADH2_HUMAN]	P19022	N-Term(Dimethyl); S8(Hex); T9(Hex); T15(Hex); K30(Dimethyl)	HCD	1.02601	1	0	1	1	Light		470.342	6.44185e-45	9.24225e-48	0	9.69217	3	1254.96	3762.85	1.25737	105.321
GIQHPPQSTATVSVTVIDVNENPYFAPNPK	Cadherin-2 OS=Homo sapiens GN=CDH2 PE=1 SV=4 - [CADH2_HUMAN]	P19022	N-Term(Dimethyl); S8(Hex); T9(Hex); T15(Hex); K30(Dimethyl)	HCD	0.975677	1	0	1	1	Light		508.897	8.95996e-49	1.2892e-51	0	4.8324	4	941.468	3762.85	0.394114	105.471
GIQHPPQSTATVSVTVIDVNENPYFAPNPK	Cadherin-2 OS=Homo sapiens GN=CDH2 PE=1 SV=4 - [CADH2_HUMAN]	P19022	N-Term(Dimethyl); T11(Hex); S13(Hex); T15(Hex); K30(Dimethyl)	HCD	1.02579	1	0	1	1	Light		246.684	1.52353e-22	2.14582e-25	0	5.42373	3	1254.96	3762.85	0.86808	105.71
GIQHPPQSTATVSVTVIDVNENPYFAPNPK	Cadherin-2 OS=Homo sapiens GN=CDH2 PE=1 SV=4 - [CADH2_HUMAN]	P19022	N-Term(Dimethyl); S8(Hex); T9(Hex); T15(Hex); K30(Dimethyl)	HCD	1.36017	1	0	1	1	Light		624.502	2.47534e-60	3.54633e-63	0	10.4645	3	1254.95	3762.85	0.47879	107.473
GIQHPPQSTATVSVTVIDVNENPYFAPNPK	Cadherin-2 OS=Homo sapiens GN=CDH2 PE=1 SV=4 - [CADH2_HUMAN]	P19022	N-Term(Dimethyl); S8(Hex); T9(Hex); T15(Hex); K30(Dimethyl)	HCD	0.947692	1	0	1	1	Light		460.547	6.17989e-44	8.81582e-47	0	12.5195	4	941.469	3762.85	1.36734	106.839
IIRQEEGLHAGTMLTTFTAQDPDR	Cadherin-2 OS=Homo sapiens GN=CDH2 PE=1 SV=4 - [CADH2_HUMAN]	P19022	N-Term(Dimethyl); T12(Hex)	HCD	0.538718	1	0	1	1	Light		410.299	5.75988e-39	9.3353e-42	1	40.6413	4	723.362	2890.43	0.403749	106.902
GIQHPPQSTATVSVTVIDVNENPYFAPNPK	Cadherin-2 OS=Homo sapiens GN=CDH2 PE=1 SV=4 - [CADH2_HUMAN]	P19022	N-Term(Dimethyl); S8(Hex); T9(Hex); T15(Hex); K30(Dimethyl)	HCD	0.573911	1	0	1	1	Light		406.503	1.55692e-38	2.23696e-41	0	5.17565	4	941.469	3762.85	1.43222	107.202
GIQHPPQSTATVSVTVIDVNENPYFAPNPK	Cadherin-2 OS=Homo sapiens GN=CDH2 PE=1 SV=4 - [CADH2_HUMAN]	P19022	N-Term(Dimethyl); S8(Hex); T9(Hex); S13(Hex); T15(Hex); K30(Dimethyl)	HCD	0.906941	1	0	1	1	Light		739.188	8.60774e-72	1.20557e-74	0	0.896907	4	981.981	3924.9	0.541616	107.377
GIQHPPQSTATVSVTVIDVNENPYFAPNPK	Cadherin-2 OS=Homo sapiens GN=CDH2 PE=1 SV=4 - [CADH2_HUMAN]	P19022	N-Term(Dimethyl); S8(Hex); T9(Hex); T15(Hex); K30(Dimethyl)	HCD	1.0586	1	0	1	1	Light		766.322	1.63492e-74	2.33227e-77	0	4.41542	3	1254.95	3762.85	-0.397115	107.617
SNISILR	Cadherin-2 OS=Homo sapiens GN=CDH2 PE=1 SV=4 - [CADH2_HUMAN]	P19022	N-Term(Dimethyl:2H(4)); S4(Hex)	HCD	0.714198	1	0	1	1	Medium		285.348	6.82971e-27	2.91868e-29	0	26.6057	2	498.797	996.587	-0.187137	60.8138
QEEGLHAGTMLTTFTAQDPDR	Cadherin-2 OS=Homo sapiens GN=CDH2 PE=1 SV=4 - [CADH2_HUMAN]	P19022	N-Term(Dimethyl:2H(4)); M10(Oxidation); T15(Hex)	HCD	3.21954	1	0	1	1	Medium		930.865	3.22043e-91	8.19448e-94	0	38.9658	3	843.397	2528.18	0.2138	77.4501
IIRQEEGLHAGTMLTTFTAQDPDR	Cadherin-2 OS=Homo sapiens GN=CDH2 PE=1 SV=4 - [CADH2_HUMAN]	P19022	N-Term(Dimethyl:2H(4)); T12(Hex); M13(Oxidation)	HCD	1.04238	1	0	1	1	Medium		390.557	5.91115e-37	8.79635e-40	1	45.9111	4	728.366	2910.44	-1.44533	77.8201
QEEGLHAGTMLTTFTAQDPDR	Cadherin-2 OS=Homo sapiens GN=CDH2 PE=1 SV=4 - [CADH2_HUMAN]	P19022	N-Term(Dimethyl:2H(4)); M10(Oxidation); T15(Hex)	HCD	3.28499	1	0	1	1	Medium		896.542	8.49167e-88	2.21715e-90	0	18.5718	3	843.396	2528.17	-0.438033	77.8514
QEEGLHAGTMLTTFTAQDPDR	Cadherin-2 OS=Homo sapiens GN=CDH2 PE=1 SV=4 - [CADH2_HUMAN]	P19022	N-Term(Dimethyl:2H(4)); T15(Hex)	HCD	3.44706	1	0	1	1	Medium		913.465	2.21978e-89	4.50259e-92	0	19.2294	3	838.065	2512.18	-0.181165	92.4594
QEEGLHAGTMLTTFTAQDPDRYMQQNIR	Cadherin-2 OS=Homo sapiens GN=CDH2 PE=1 SV=4 - [CADH2_HUMAN]	P19022	N-Term(Dimethyl:2H(4)); M10(Oxidation); T15(Hex)	HCD	6.95028	1	0	1	1	Medium		520.224	5.25224e-50	9.49773e-53	1	36.2892	4	866.16	3461.62	-2.03506	94.8946
GIQHPPQSTATVSVTVIDVNENPYFAPNPK	Cadherin-2 OS=Homo sapiens GN=CDH2 PE=1 SV=4 - [CADH2_HUMAN]	P19022	N-Term(Dimethyl:2H(4)); T9(Hex); T11(Hex); S13(Hex); T15(Hex); K30(Dimethyl:2H(4))	HCD	1.25319	1	0	1	1	Medium		629.753	7.08111e-61	1.05846e-63	0	3.71243	3	1311.66	3932.95	0.20707	96.9641
GIQHPPQSTATVSVTVIDVNENPYFAPNPK	Cadherin-2 OS=Homo sapiens GN=CDH2 PE=1 SV=4 - [CADH2_HUMAN]	P19022	N-Term(Dimethyl:2H(4)); T9(Hex); T11(Hex); T15(Hex); K30(Dimethyl:2H(4))	HCD	0.982959	1	0	1	1	Medium		467.403	1.16737e-44	1.81833e-47	0	18.0213	3	1257.64	3770.9	1.59934	99.6535
GIQHPPQSTATVSVTVIDVNENPYFAPNPK	Cadherin-2 OS=Homo sapiens GN=CDH2 PE=1 SV=4 - [CADH2_HUMAN]	P19022	N-Term(Dimethyl:2H(4)); T11(Hex); S13(Hex); T15(Hex); K30(Dimethyl:2H(4))	HCD	1.14274	1	0	1	1	Medium		399.916	6.65679e-38	1.01942e-40	0	19.8522	4	943.48	3770.9	0.349471	99.683
GIQHPPQSTATVSVTVIDVNENPYFAPNPK	Cadherin-2 OS=Homo sapiens GN=CDH2 PE=1 SV=4 - [CADH2_HUMAN]	P19022	N-Term(Dimethyl:2H(4)); T9(Hex); T11(Hex); T15(Hex); K30(Dimethyl:2H(4))	HCD	1.16392	1	0	1	1	Medium		562.184	3.96713e-54	6.04746e-57	0	10.5981	4	943.48	3770.9	0.284728	100.074
GIQHPPQSTATVSVTVIDVNENPYFAPNPK	Cadherin-2 OS=Homo sapiens GN=CDH2 PE=1 SV=4 - [CADH2_HUMAN]	P19022	N-Term(Dimethyl:2H(4)); T11(Hex); S13(Hex); T15(Hex); K30(Dimethyl:2H(4))	HCD	0.864551	1	0	1	1	Medium		468.524	9.00411e-45	1.4047e-47	0	6.50818	4	943.48	3770.9	0.155241	100.455
IDPVNGQITTIAVLDR	Cadherin-2 OS=Homo sapiens GN=CDH2 PE=1 SV=4 - [CADH2_HUMAN]	P19022	N-Term(Dimethyl:2H(4)); T9(Hex)	HCD	1.84769	1	0	1	1	Medium		230.959	2.4136e-21	8.01859e-24	0	47.0815	2	960.035	1919.06	-0.27539	102.184
GIQHPPQSTATVSVTVIDVNENPYFAPNPK	Cadherin-2 OS=Homo sapiens GN=CDH2 PE=1 SV=4 - [CADH2_HUMAN]	P19022	N-Term(Dimethyl:2H(4)); T9(Hex); S13(Hex); T15(Hex); K30(Dimethyl:2H(4))	HCD	1.22324	1	0	1	1	Medium		585.258	1.92484e-56	2.97962e-59	0	32.0011	4	943.481	3770.9	0.414214	97.2613
GIQHPPQSTATVSVTVIDVNENPYFAPNPK	Cadherin-2 OS=Homo sapiens GN=CDH2 PE=1 SV=4 - [CADH2_HUMAN]	P19022	N-Term(Dimethyl:2H(4)); T9(Hex); T11(Hex); S13(Hex); T15(Hex); K30(Dimethyl:2H(4))	HCD	0.949669	1	0	1	1	Medium		683.728	2.86949e-66	4.23854e-69	0	9.14134	3	1311.65	3932.95	-0.351611	97.4039
QEEGLHAGTMLTTFTAQDPDRYMQQNIR	Cadherin-2 OS=Homo sapiens GN=CDH2 PE=1 SV=4 - [CADH2_HUMAN]	P19022	N-Term(Dimethyl:2H(4)); T15(Hex)	HCD	2.69805	1	0	1	1	Medium		671.84	3.71861e-65	6.54685e-68	1	43.0262	4	862.161	3445.62	-2.81174	106.557
QEEGLHAGTMLTTFTAQDPDRYMQQNIR	Cadherin-2 OS=Homo sapiens GN=CDH2 PE=1 SV=4 - [CADH2_HUMAN]	P19022	N-Term(Dimethyl:2H(4)); T13(Hex)	HCD	1.41673	1	0	1	1	Medium		562.339	3.4021e-54	5.8355e-57	1	38.5189	4	862.161	3445.62	-1.89062	107.437
QEEGLHAGTMLTTFTAQDPDR	Cadherin-2 OS=Homo sapiens GN=CDH2 PE=1 SV=4 - [CADH2_HUMAN]	P19022	N-Term(Dimethyl:2H(4)); M10(Oxidation); T15(Hex)	HCD	2.85612	1	0	1	1	Medium		906.219	9.31375e-89	2.38814e-91	0	16.9984	3	843.396	2528.17	-0.655311	80.8654
QEEGLHAGTMLTTFTAQDPDR	Cadherin-2 OS=Homo sapiens GN=CDH2 PE=1 SV=4 - [CADH2_HUMAN]	P19022	N-Term(Dimethyl:2H(4)); T15(Hex)	HCD	2.51718	1	0	1	1	Medium		791.147	3.83919e-77	7.67839e-80	0	21.0025	3	838.065	2512.18	-0.32694	96.2334
QEEGLHAGTMLTTFTAQDPDR	Cadherin-2 OS=Homo sapiens GN=CDH2 PE=1 SV=4 - [CADH2_HUMAN]	P19022	N-Term(Dimethyl:2H(4)); T15(Hex)	HCD	2.41149	1	0	1	1	Medium		799.16	5.87224e-78	1.21327e-80	0	13.9688	3	838.065	2512.18	-0.764262	94.2237
QEEGLHAGTMLTTFTAQDPDR	Cadherin-2 OS=Homo sapiens GN=CDH2 PE=1 SV=4 - [CADH2_HUMAN]	P19022	N-Term(Dimethyl:2H(4)); T15(Hex)	HCD	3.05217	1	0	1	1	Medium		843.481	2.22512e-82	4.48613e-85	0	18.3823	3	838.065	2512.18	-0.254053	97.7577
QEEGLHAGTMLTTFTAQDPDR	Cadherin-2 OS=Homo sapiens GN=CDH2 PE=1 SV=4 - [CADH2_HUMAN]	P19022	N-Term(Dimethyl:2H(4)); T15(Hex)	HCD	3.06709	1	0	1	1	Medium		927.199	9.45356e-91	1.90596e-93	0	18.702	3	838.065	2512.18	-0.254053	98.178
QEEGLHAGTMLTTFTAQDPDR	Cadherin-2 OS=Homo sapiens GN=CDH2 PE=1 SV=4 - [CADH2_HUMAN]	P19022	N-Term(Dimethyl:2H(4)); T15(Hex)	HCD	5.67341	1	0	1	1	Medium		641.22	3.66258e-62	7.55171e-65	0	25.8594	3	838.065	2512.18	-0.545601	101.968
GIQHPPQSTATVSVTVIDVNENPYFAPNPK	Cadherin-2 OS=Homo sapiens GN=CDH2 PE=1 SV=4 - [CADH2_HUMAN]	P19022	N-Term(Dimethyl:2H(4)); T9(Hex); T11(Hex); S13(Hex); T15(Hex); K30(Dimethyl:2H(4))	HCD	1.23694	1	0	1	1	Medium		690.233	6.0936e-67	9.47683e-70	0	0	3	1311.66	3932.96	1.04509	102.117
QEEGLHAGTMLTTFTAQDPDRYMQQNIR	Cadherin-2 OS=Homo sapiens GN=CDH2 PE=1 SV=4 - [CADH2_HUMAN]	P19022	N-Term(Dimethyl:2H(4)); M10(Oxidation); T15(Hex)	HCD	1.25059	1	0	1	1	Medium		224.566	2.25409e-20	3.49471e-23	1	35.953	4	866.162	3461.63	0.0102484	102.468
GIQHPPQSTATVSVTVIDVNENPYFAPNPK	Cadherin-2 OS=Homo sapiens GN=CDH2 PE=1 SV=4 - [CADH2_HUMAN]	P19022	N-Term(Dimethyl:2H(4)); T9(Hex); T11(Hex); S13(Hex); T15(Hex); K30(Dimethyl:2H(4))	HCD	0.800632	1	0	1	1	Medium		576.543	1.47867e-55	2.21689e-58	0	9.43139	4	983.993	3932.95	0.0019049	102.716
GIQHPPQSTATVSVTVIDVNENPYFAPNPK	Cadherin-2 OS=Homo sapiens GN=CDH2 PE=1 SV=4 - [CADH2_HUMAN]	P19022	N-Term(Dimethyl:2H(4)); T9(Hex); T11(Hex); S13(Hex); T15(Hex); K30(Dimethyl:2H(4))	HCD	0.973208	1	0	1	1	Medium		623.597	2.93095e-60	4.36803e-63	0	2.5514	3	1311.66	3932.95	0.300183	103
GIQHPPQSTATVSVTVIDVNENPYFAPNPK	Cadherin-2 OS=Homo sapiens GN=CDH2 PE=1 SV=4 - [CADH2_HUMAN]	P19022	N-Term(Dimethyl:2H(4)); T9(Hex); T11(Hex); S13(Hex); T15(Hex); K30(Dimethyl:2H(4))	HCD	0.95415	1	0	1	1	Medium		533.741	2.8441e-51	4.226e-54	0	9.67987	4	983.994	3932.95	0.250208	103.071
QEEGLHAGTMLTTFTAQDPDRYMQQNIR	Cadherin-2 OS=Homo sapiens GN=CDH2 PE=1 SV=4 - [CADH2_HUMAN]	P19022	N-Term(Dimethyl:2H(4)); T13(Hex); M23(Oxidation)	HCD	1.71123	1	0	1	1	Medium		564.008	2.20522e-54	3.97337e-57	1	31.9297	4	866.159	3461.61	-3.09298	104.382
GIQHPPQSTATVSVTVIDVNENPYFAPNPK	Cadherin-2 OS=Homo sapiens GN=CDH2 PE=1 SV=4 - [CADH2_HUMAN]	P19022	N-Term(Dimethyl:2H(4)); T11(Hex); S13(Hex); T15(Hex); K30(Dimethyl:2H(4))	HCD	1.23265	1	0	1	1	Medium		195.005	2.04685e-17	3.15872e-20	0	17.5108	4	943.48	3770.9	0.0904976	104.92
QEEGLHAGTMLTTFTAQDPDRYMQQNIR	Cadherin-2 OS=Homo sapiens GN=CDH2 PE=1 SV=4 - [CADH2_HUMAN]	P19022	N-Term(Dimethyl:2H(4)); M10(Oxidation); T15(Hex)	HCD	1.59317	1	0	1	1	Medium		384.755	1.86045e-36	3.34613e-39	1	74.8902	4	866.16	3461.62	-1.894	105.387
GIQHPPQSTATVSVTVIDVNENPYFAPNPK	Cadherin-2 OS=Homo sapiens GN=CDH2 PE=1 SV=4 - [CADH2_HUMAN]	P19022	N-Term(Dimethyl:2H(4)); T11(Hex); S13(Hex); T15(Hex); K30(Dimethyl:2H(4))	HCD	1.1493	1	0	1	1	Medium		386.314	1.49767e-36	2.33646e-39	0	13.8978	4	943.48	3770.9	0.155241	105.708
GIQHPPQSTATVSVTVIDVNENPYFAPNPK	Cadherin-2 OS=Homo sapiens GN=CDH2 PE=1 SV=4 - [CADH2_HUMAN]	P19022	N-Term(Dimethyl:2H(4)); T11(Hex); S13(Hex); T15(Hex); K30(Dimethyl:2H(4))	HCD	1.04224	1	0	1	1	Medium		438.559	8.75007e-42	1.39332e-44	0	0	3	1257.64	3770.91	2.08492	106.572
GIQHPPQSTATVSVTVIDVNENPYFAPNPK	Cadherin-2 OS=Homo sapiens GN=CDH2 PE=1 SV=4 - [CADH2_HUMAN]	P19022	N-Term(Dimethyl:2H(4)); T11(Hex); S13(Hex); T15(Hex); K30(Dimethyl:2H(4))	HCD	1.22617	1	0	1	1	Medium		370.486	5.65131e-35	8.94194e-38	0	5.33023	3	1257.64	3770.91	1.69646	106.968
GIQHPPQSTATVSVTVIDVNENPYFAPNPK	Cadherin-2 OS=Homo sapiens GN=CDH2 PE=1 SV=4 - [CADH2_HUMAN]	P19022	N-Term(Dimethyl:2H(4)); T11(Hex); S13(Hex); T15(Hex); K30(Dimethyl:2H(4))	HCD	1.34263	1	0	1	1	Medium		350.771	4.91548e-33	8.37391e-36	0	10.8235	4	943.484	3770.91	4.16931	107.011
GIQHPPQSTATVSVTVIDVNENPYFAPNPK	Cadherin-2 OS=Homo sapiens GN=CDH2 PE=1 SV=4 - [CADH2_HUMAN]	P19022	N-Term(Dimethyl:2H(4)); T11(Hex); S13(Hex); T15(Hex); K30(Dimethyl:2H(4))	HCD	1.11331	1	0	1	1	Medium		369.313	7.74231e-35	1.1713e-37	0	46.7931	4	943.479	3770.9	-0.81591	106.198
QEEGLHAGTMLTTFTAQDPDR	Cadherin-2 OS=Homo sapiens GN=CDH2 PE=1 SV=4 - [CADH2_HUMAN]	P19022	N-Term(Dimethyl:2H(4)); M10(Oxidation); T13(Hex)	HCD	4.5007	1	0	1	1	Medium		441.233	3.05671e-42	7.52885e-45	0	41.0399	3	843.397	2528.18	0.575929	95.8516
GIQHPPQSTATVSVTVIDVNENPYFAPNPK	Cadherin-2 OS=Homo sapiens GN=CDH2 PE=1 SV=4 - [CADH2_HUMAN]	P19022	N-Term(Dimethyl:2H(4)); T11(Hex); S13(Hex); T15(Hex); K30(Dimethyl:2H(4))	HCD	1.09269	1	0	1	1	Medium		234.451	2.3363e-21	3.58878e-24	0	19.6225	4	943.48	3770.9	0.0257543	107.684
QEEGLHAGTMLTTFTAQDPDRYMQQNIR	Cadherin-2 OS=Homo sapiens GN=CDH2 PE=1 SV=4 - [CADH2_HUMAN]	P19022	N-Term(Dimethyl:2H(4)); T13(Hex); M23(Oxidation)	HCD	1.1624	1	0	1	1	Medium		454.19	2.09198e-43	3.81053e-46	1	35.8124	4	866.159	3461.61	-3.37509	107.813
QEEGLHAGTMLTTFTAQDPDR	Cadherin-2 OS=Homo sapiens GN=CDH2 PE=1 SV=4 - [CADH2_HUMAN]	P19022	N-Term(Dimethyl:2H(4)); T15(Hex)	HCD	3.08978	1	0	1	1	Medium		853.133	2.4062e-83	4.861e-86	0	15.6897	3	838.065	2512.18	-0.108278	107.263
GIQHPPQSTATVSVTVIDVNENPYFAPNPK	Cadherin-2 OS=Homo sapiens GN=CDH2 PE=1 SV=4 - [CADH2_HUMAN]	P19022	N-Term(Dimethyl:2H(4)); T9(Hex); T11(Hex); S13(Hex); T15(Hex); K30(Dimethyl:2H(4))	HCD	1.08304	1	0	1	1	Medium		722.263	3.98529e-70	5.93933e-73	0	2.87749	3	1311.66	3932.95	0.300183	107.339
LTTFTAQDPDR	Cadherin-2 OS=Homo sapiens GN=CDH2 PE=1 SV=4 - [CADH2_HUMAN]	P19022	N-Term(Dimethyl:2H(4)); T5(Hex)	HCD	6.68362	1	0	1	1	Medium		445.787	1.24961e-41	2.63797e-45	0	20.4957	2	729.867	1458.73	0.187601	61.5124
LTTFTAQDPDRYMQQNIR	Cadherin-2 OS=Homo sapiens GN=CDH2 PE=1 SV=4 - [CADH2_HUMAN]	P19022	N-Term(Dimethyl:2H(4)); T3(Hex); M13(Oxidation)	HCD	2.11722	1	0	1	1	Medium		305.792	2.52395e-27	2.63487e-31	1	41.0009	3	803.394	2408.17	-0.595063	73.1316
TVTAIDADDPNALNGMLR	Cadherin-2 OS=Homo sapiens GN=CDH2 PE=1 SV=4 - [CADH2_HUMAN]	P19022	N-Term(Dimethyl:2H(4)); T1(Hex); M16(Oxidation)	HCD	3.09605	1	0	1	1	Medium		645.808	2.19286e-61	2.62524e-65	0	27.8131	3	699.682	2097.03	0.226742	84.6362
TVTAIDADDPNALNGMLR	Cadherin-2 OS=Homo sapiens GN=CDH2 PE=1 SV=4 - [CADH2_HUMAN]	P19022	N-Term(Dimethyl:2H(4)); T1(Hex); M16(Oxidation)	HCD	3.02412	1	0	1	1	Medium		909.359	9.56319e-88	1.15903e-91	0	12.2196	2	1049.02	2097.03	-0.523589	84.7259
LTTFTAQDPDRYMQQNIR	Cadherin-2 OS=Homo sapiens GN=CDH2 PE=1 SV=4 - [CADH2_HUMAN]	P19022	N-Term(Dimethyl:2H(4)); T5(Hex)	HCD	2.4312	1	0	1	1	Medium		287.99	1.57426e-25	1.58855e-29	1	25.5341	3	798.062	2392.17	-1.47451	88.678
TVTAIDADDPNALNGMLR	Cadherin-2 OS=Homo sapiens GN=CDH2 PE=1 SV=4 - [CADH2_HUMAN]	P19022	N-Term(Dimethyl:2H(4)); T3(Hex)	HCD	3.1123	1	0	1	1	Medium		802.995	4.22242e-77	5.01773e-81	0	10.7199	2	1041.02	2081.04	0.313764	102.365
TVTAIDADDPNALNGMLR	Cadherin-2 OS=Homo sapiens GN=CDH2 PE=1 SV=4 - [CADH2_HUMAN]	P19022	N-Term(Dimethyl:2H(4)); T1(Hex)	HCD	2.65305	1	0	1	1	Medium		542.526	4.76645e-51	5.58984e-55	0	23.6979	3	694.351	2081.04	0.101998	102.375
LTTFTAQDPDR	Cadherin-2 OS=Homo sapiens GN=CDH2 PE=1 SV=4 - [CADH2_HUMAN]	P19022	N-Term(Dimethyl:2H(4)); T5(Hex)	HCD	9.44003	1	0	1	1	Medium		330.144	4.93028e-30	9.67481e-34	0	51.9253	2	729.866	1458.73	-0.398179	62.6222
TVTAIDADDPNALNGMLR	Cadherin-2 OS=Homo sapiens GN=CDH2 PE=1 SV=4 - [CADH2_HUMAN]	P19022	N-Term(Dimethyl:2H(4)); T1(Hex); M16(Oxidation)	HCD	2.65161	1	0	1	1	Medium		539.271	1.00597e-50	1.1828e-54	0	76.6279	3	699.682	2097.03	-0.297157	86.361
TVTAIDADDPNALNGMLR	Cadherin-2 OS=Homo sapiens GN=CDH2 PE=1 SV=4 - [CADH2_HUMAN]	P19022	N-Term(Dimethyl:2H(4)); T3(Hex); M16(Oxidation)	HCD	2.92752	1	0	1	1	Medium		908.847	1.1058e-87	1.30417e-91	0	9.5766	2	1049.02	2097.03	-0.0579009	86.4519
IITAIDQDKGRPR	Cadherin-23 OS=Homo sapiens GN=CDH23 PE=1 SV=2 - [CAD23_HUMAN]	Q9H251	N-Term(Dimethyl); T3(Hex); K9(Dimethyl)	ETciD	0.254558	1	0	1	1	Light	3.71727				1	39.2541	4	425.994	1700.95	0.166483	48.5846
VVEVQEGIPTGEPVCVYTAEDPDKENQK	Cadherin-3 OS=Homo sapiens GN=CDH3 PE=1 SV=2 - [CADH3_HUMAN]	P22223	N-Term(Dimethyl); C15(Carbamidomethyl); T18(Hex); K24(Dimethyl); K28(Dimethyl)	ETciD	0.262884	1	0	1	1	Light	5.35851				1	4.50992	4	844.914	3376.63	-0.281102	90.6967
VVEVQEGIPTGEPVCVYTAEDPDKENQK	Cadherin-3 OS=Homo sapiens GN=CDH3 PE=1 SV=2 - [CADH3_HUMAN]	P22223	N-Term(Dimethyl); C15(Carbamidomethyl); T18(Hex); K24(Dimethyl); K28(Dimethyl)	ETciD	0.197807	1	0	1	1	Light	2.06749				1	1.16247	3	1126.22	3376.64	0.897802	90.7252
VVEVQEGIPTGEPVCVYTAEDPDKENQK	Cadherin-3 OS=Homo sapiens GN=CDH3 PE=1 SV=2 - [CADH3_HUMAN]	P22223	N-Term(Dimethyl); C15(Carbamidomethyl); T18(Hex); K24(Dimethyl); K28(Dimethyl)	HCD	0.262884	1	0	1	1	Light		742.952	4.20612e-72	5.06761e-75	1	4.50992	4	844.914	3376.63	-0.281102	90.7077
VVEVQEGIPTGEPVCVYTAEDPDKENQK	Cadherin-3 OS=Homo sapiens GN=CDH3 PE=1 SV=2 - [CADH3_HUMAN]	P22223	N-Term(Dimethyl); C15(Carbamidomethyl); T18(Hex); K24(Dimethyl); K28(Dimethyl)	HCD	0.197807	1	0	1	1	Light		695.567	2.32304e-67	2.77543e-70	1	1.16247	3	1126.22	3376.64	0.897802	90.7354
LTVTDLDAPNSPAWR	Cadherin-3 OS=Homo sapiens GN=CDH3 PE=1 SV=2 - [CADH3_HUMAN]	P22223	N-Term(Dimethyl); T2(Hex)	HCD	0.151736	1	0	1	1	Light		373.373	2.32282e-35	4.59964e-38	0	24.2362	2	923.465	1845.92	0.228689	99.3798
LTVTDLDAPNSPAWR	Cadherin-3 OS=Homo sapiens GN=CDH3 PE=1 SV=2 - [CADH3_HUMAN]	P22223	N-Term(Dimethyl); T2(Hex)	HCD	0.285299	1	0	1	1	Light		324.929	1.68417e-30	3.21406e-33	0	0	2	923.465	1845.92	-0.168089	99.8147
TVTANDADDSTTANGMVR	Cadherin-4 OS=Homo sapiens GN=CDH4 PE=2 SV=2 - [CADH4_HUMAN]	P55283	N-Term(Dimethyl:2H(4)); T12(Hex)	HCD	3.23639	1	0	1	1	Medium		504.495	1.75195e-47	3.5522e-51	0	9.60062	2	1016.97	2032.93	1.18109	54.9703
VGTTVGQVCATDKDEPDTMHTR	Desmocollin-2 OS=Homo sapiens GN=DSC2 PE=1 SV=1 - [DSC2_HUMAN]	Q02487	N-Term(Dimethyl); T4(Hex); C9(Carbamidomethyl); K13(Dimethyl)	ETciD	0.260074	1	0	1	1	Light	6.22614				1	0	3	879.411	2636.22	-0.142572	55.4511
VTVEDKDLVNTANWR	Desmocollin-2 OS=Homo sapiens GN=DSC2 PE=1 SV=1 - [DSC2_HUMAN]	Q02487	N-Term(Dimethyl); T2(Hex); K6(Dimethyl)	ETciD	0.764485	1	0	1	1	Light	4.57614				1	35.4546	3	660.009	1978.01	0.31172	85.5841
VGTTVGQVCATDKDEPDTMHTR	Desmocollin-2 OS=Homo sapiens GN=DSC2 PE=1 SV=1 - [DSC2_HUMAN]	Q02487	N-Term(Dimethyl); T3(Hex); C9(Carbamidomethyl); K13(Dimethyl); M19(Oxidation)	ETciD	0.205025	1	0	1	1	Light	6.75933				1	16.2236	4	663.809	2652.21	0.343684	51.3926
VTVEDKDLVNTANWR	Desmocollin-2 OS=Homo sapiens GN=DSC2 PE=1 SV=1 - [DSC2_HUMAN]	Q02487	N-Term(Dimethyl); T2(Hex); K6(Dimethyl)	ETciD	1.00713	1	0	1	1	Light	3.26107				1	36.3725	3	660.009	1978.01	0.21915	88.6895
VGTTVGQVCATDKDEPDTMHTR	Desmocollin-2 OS=Homo sapiens GN=DSC2 PE=1 SV=1 - [DSC2_HUMAN]	Q02487	N-Term(Dimethyl:2H(4)); T3(Hex); C9(Carbamidomethyl); K13(Dimethyl:2H(4)); M19(Oxidation)	ETciD	0.278005	1	0	1	1	Medium	6.16362				1	45.7173	4	665.821	2660.26	-0.17831	49.7484
VGTTVGQVCATDKDEPDTMHTR	Desmocollin-2 OS=Homo sapiens GN=DSC2 PE=1 SV=1 - [DSC2_HUMAN]	Q02487	N-Term(Dimethyl:2H(4)); T4(Hex); C9(Carbamidomethyl); K13(Dimethyl:2H(4))	ETciD	0.271625	1	0	1	1	Medium	6.4613				1	40.2719	4	661.823	2644.27	0.113462	55.4131
TCTGTLGIILQDVNDNSPFIPK	Desmocollin-2 OS=Homo sapiens GN=DSC2 PE=1 SV=1 - [DSC2_HUMAN]	Q02487	T1(Hex); N-Term(Dimethyl:2H(4)); C2(Carbamidomethyl); T3(Hex); T5(Hex); K22(Dimethyl:2H(4))	ETciD	1.09102	1	0	1	1	Medium	4.08561				0	11.6222	3	985.169	2953.49	-0.276348	108.568
VTVEDKDLVNTANWR	Desmocollin-2 OS=Homo sapiens GN=DSC2 PE=1 SV=1 - [DSC2_HUMAN]	Q02487	N-Term(Dimethyl:2H(4)); T2(Hex); K6(Dimethyl:2H(4))	ETciD	0.558966	1	0	1	1	Medium	3.64954				1	34.5194	3	662.692	1986.06	-0.32588	89.3303
TCTGTLGIILQDVNDNSPFIPK	Desmocollin-2 OS=Homo sapiens GN=DSC2 PE=1 SV=1 - [DSC2_HUMAN]	Q02487	T1(Hex); N-Term(Dimethyl:2H(4)); C2(Carbamidomethyl); T3(Hex); T5(Hex); K22(Dimethyl:2H(4))	ETciD	1.00218	1	0	1	1	Medium	4.89527				0	4.35092	3	985.17	2953.49	0.157626	108.647
VGTTVGQVCATDKDEPDTMHTR	Desmocollin-2 OS=Homo sapiens GN=DSC2 PE=1 SV=1 - [DSC2_HUMAN]	Q02487	N-Term(Dimethyl); T4(Hex); C9(Carbamidomethyl); K13(Dimethyl); M19(Oxidation)	HCD	0.278005	1	0	1	1	Light		628.667	7.35407e-61	1.35935e-63	1	44.2923	4	663.808	2652.21	-1.31325	49.865
VGTTVGQVCATDKDEPDTMHTR	Desmocollin-2 OS=Homo sapiens GN=DSC2 PE=1 SV=1 - [DSC2_HUMAN]	Q02487	N-Term(Dimethyl); C9(Carbamidomethyl); T11(Hex); K13(Dimethyl)	HCD	0.260074	1	0	1	1	Light		792.905	2.72025e-77	5.12288e-80	1	0	3	879.411	2636.22	-0.142572	55.4622
TCTGTLGIILQDVNDNSPFIPK	Desmocollin-2 OS=Homo sapiens GN=DSC2 PE=1 SV=1 - [DSC2_HUMAN]	Q02487	N-Term(Dimethyl); T1(Hex); C2(Carbamidomethyl); T5(Hex); S17(Hex); K22(Dimethyl)	HCD	1.09102	1	0	1	1	Light		280.915	5.49974e-26	8.09976e-29	0	0.626667	3	982.486	2945.44	0.338465	108.592
VGTTVGQVCATDKDEPDTMHTR	Desmocollin-2 OS=Homo sapiens GN=DSC2 PE=1 SV=1 - [DSC2_HUMAN]	Q02487	N-Term(Dimethyl); T4(Hex); C9(Carbamidomethyl); K13(Dimethyl); M19(Oxidation)	HCD	0.205025	1	0	1	1	Light		585.674	1.53787e-56	2.70752e-59	1	16.2236	4	663.809	2652.21	0.343684	51.4039
VTVEDKDLVNTANWR	Desmocollin-2 OS=Homo sapiens GN=DSC2 PE=1 SV=1 - [DSC2_HUMAN]	Q02487	N-Term(Dimethyl); K6(Dimethyl); T11(Hex)	HCD	1.00713	1	0	1	1	Light		277.611	7.4359e-26	1.73331e-28	1	36.3725	3	660.009	1978.01	0.21915	88.7007
VTVEDKDLVNTANWR	Desmocollin-2 OS=Homo sapiens GN=DSC2 PE=1 SV=1 - [DSC2_HUMAN]	Q02487	N-Term(Dimethyl); K6(Dimethyl); T11(Hex)	HCD	0.558966	1	0	1	1	Light		453.908	1.78109e-43	4.06642e-46	1	38.3409	3	660.009	1978.01	0.034009	89.3902
VGTTVGQVCATDKDEPDTMHTR	Desmocollin-2 OS=Homo sapiens GN=DSC2 PE=1 SV=1 - [DSC2_HUMAN]	Q02487	N-Term(Dimethyl:2H(4)); C9(Carbamidomethyl); T11(Hex); K13(Dimethyl:2H(4))	HCD	0.271625	1	0	1	1	Medium		721.071	4.47009e-70	7.81484e-73	1	40.2719	4	661.823	2644.27	0.113462	55.4252
VTVEDKDLVNTANWR	Desmocollin-2 OS=Homo sapiens GN=DSC2 PE=1 SV=1 - [DSC2_HUMAN]	Q02487	N-Term(Dimethyl:2H(4)); K6(Dimethyl:2H(4)); T11(Hex)	HCD	0.764485	1	0	1	1	Medium		424.025	1.67445e-40	3.9585e-43	1	32.7978	3	662.693	1986.06	0.227291	85.5199
TCTGTLGIILQDVNDNSPFIPK	Desmocollin-2 OS=Homo sapiens GN=DSC2 PE=1 SV=1 - [DSC2_HUMAN]	Q02487	T1(Hex); N-Term(Dimethyl:2H(4)); C2(Carbamidomethyl); T5(Hex); S17(Hex); K22(Dimethyl:2H(4))	HCD	1.00218	1	0	1	1	Medium		724.05	2.58557e-70	3.93542e-73	0	4.35092	3	985.17	2953.49	0.157626	108.657
TCTGTLGIILQDVNDNSPFIPK	Desmocollin-2 OS=Homo sapiens GN=DSC2 PE=1 SV=1 - [DSC2_HUMAN]	Q02487	T1(Hex); N-Term(Dimethyl:2H(4)); C2(Carbamidomethyl); T5(Hex); S17(Hex); K22(Dimethyl:2H(4))	HCD	1.06751	1	0	1	1	Medium		760.926	5.32442e-74	8.07954e-77	0	4.35403	3	985.169	2953.49	0.0336336	108.76
MFSFSGFDSTNQHTVQTENR	DnaJ homolog subfamily B member 9 OS=Homo sapiens GN=DNAJB9 PE=1 SV=1 - [DNJB9_HUMAN]	Q9UBS3	N-Term(Dimethyl); S3(Hex)	ETciD	0.778964	1	0	1	1	Light	4.1663				0	35.4958	3	841.708	2523.11	-0.240788	91.1126
MFSFSGFDSTNQHTVQTENR	DnaJ homolog subfamily B member 9 OS=Homo sapiens GN=DNAJB9 PE=1 SV=1 - [DNJB9_HUMAN]	Q9UBS3	N-Term(Dimethyl); S5(Hex)	HCD	0.778964	1	0	1	1	Light		692.365	1.81562e-67	5.80072e-70	0	35.4958	3	841.708	2523.11	-0.240788	91.123
DPVPGKPTVTIR	Dystroglycan OS=Homo sapiens GN=DAG1 PE=1 SV=2 - [DAG1_HUMAN]	Q14118	N-Term(Dimethyl); K6(Dimethyl); T8(Hex); T10(Hex)	ETciD	2.1796	1	0	1	1	Light	3.11932				0	25.6686	3	553.973	1659.91	0.150828	60.3962
DPVPGKPTVTIR	Dystroglycan OS=Homo sapiens GN=DAG1 PE=1 SV=2 - [DAG1_HUMAN]	Q14118	N-Term(Dimethyl:2H(4)); K6(Dimethyl:2H(4)); T8(Hex); T10(Hex)	ETciD	1.95733	1	0	1	1	Medium	3.11497				0	33.3172	3	556.657	1667.96	-0.0587049	62.2264
DPVPGKPTVTIR	Dystroglycan OS=Homo sapiens GN=DAG1 PE=1 SV=2 - [DAG1_HUMAN]	Q14118	N-Term(Dimethyl); K6(Dimethyl); T8(Hex); T10(Hex)	HCD	2.1796	1	0	1	1	Light		371.37	2.21779e-35	7.29537e-38	0	25.6686	3	553.973	1659.91	0.150828	60.4083
KPTVTIR	Dystroglycan OS=Homo sapiens GN=DAG1 PE=1 SV=2 - [DAG1_HUMAN]	Q14118	N-Term(Dimethyl); K1(Dimethyl); T3(Hex); T5(Hex)	HCD	1.52386	1	0	1	1	Light		339.716	2.44716e-31	1.0677e-34	0	6.86506	3	398.899	1194.68	0.131596	34.3562
DPVPGKPTVTIR	Dystroglycan OS=Homo sapiens GN=DAG1 PE=1 SV=2 - [DAG1_HUMAN]	Q14118	N-Term(Dimethyl:2H(4)); K6(Dimethyl:2H(4)); T8(Hex); T10(Hex)	HCD	1.95733	1	0	1	1	Medium		286.351	5.65271e-27	2.31668e-29	0	38.6841	3	556.656	1667.95	-0.827154	61.8858
SFISGGSTITGVGK	Hepatocyte growth factor receptor OS=Homo sapiens GN=MET PE=1 SV=4 - [MET_HUMAN]	P08581	N-Term(Dimethyl:2H(4)); T10(Hex); K14(Dimethyl:2H(4))	ETciD	12441	1	0	1	1	Medium	2.40824				0	36.5127	2	768.934	1536.86	-0.0754773	75.4091
SFISGGSTITGVGK	Hepatocyte growth factor receptor OS=Homo sapiens GN=MET PE=1 SV=4 - [MET_HUMAN]	P08581	N-Term(Dimethyl:2H(4)); T10(Hex); K14(Dimethyl:2H(4))	ETciD	4073.42	1	0	1	1	Medium	2.11304				0	0	2	768.934	1536.86	-0.631476	77.7497
SFISGGSTITGVGK	Hepatocyte growth factor receptor OS=Homo sapiens GN=MET PE=1 SV=4 - [MET_HUMAN]	P08581	N-Term(Dimethyl:2H(4)); T8(Hex); K14(Dimethyl:2H(4))	ETciD	100000	1	0	1	1	Medium	2.78241				0	2.38966	2	768.934	1536.86	0.00395103	79.4269
YGPMAGGTLLTLTGNYLNSGNSR	Hepatocyte growth factor receptor OS=Homo sapiens GN=MET PE=1 SV=4 - [MET_HUMAN]	P08581	N-Term(Dimethyl:2H(4)); M4(Oxidation); T11(Hex)	ETciD	3932.88	1	0	1	1	Medium	2.80165				0	8.61019	3	856.425	2567.26	0.00794896	108.329
SFISGGSTITGVGK	Hepatocyte growth factor receptor OS=Homo sapiens GN=MET PE=1 SV=4 - [MET_HUMAN]	P08581	N-Term(Dimethyl:2H(4)); T10(Hex); K14(Dimethyl:2H(4))	ETciD	3645.88	1	0	1	1	Medium	2.67385				0	0	2	768.934	1536.86	-0.393191	81.9829
SFISGGSTITGVGK	Hepatocyte growth factor receptor OS=Homo sapiens GN=MET PE=1 SV=4 - [MET_HUMAN]	P08581	N-Term(Dimethyl:2H(4)); T10(Hex); K14(Dimethyl:2H(4))	HCD	12441	1	0	1	1	Medium		643.705	1.1676e-62	4.26131e-65	0	36.5127	2	768.934	1536.86	-0.0754773	75.4218
SFISGGSTITGVGK	Hepatocyte growth factor receptor OS=Homo sapiens GN=MET PE=1 SV=4 - [MET_HUMAN]	P08581	N-Term(Dimethyl:2H(4)); T10(Hex); K14(Dimethyl:2H(4))	HCD	1207.06	1	0	1	1	Medium		459.381	3.34392e-44	1.15308e-46	0	14.8375	2	768.934	1536.86	0.321664	77.8638
SFISGGSTITGVGK	Hepatocyte growth factor receptor OS=Homo sapiens GN=MET PE=1 SV=4 - [MET_HUMAN]	P08581	N-Term(Dimethyl:2H(4)); T10(Hex); K14(Dimethyl:2H(4))	HCD	4073.42	1	0	1	1	Medium		478.93	3.28795e-46	1.27936e-48	0	0	2	768.934	1536.86	-0.631476	77.7601
SFISGGSTITGVGK	Hepatocyte growth factor receptor OS=Homo sapiens GN=MET PE=1 SV=4 - [MET_HUMAN]	P08581	N-Term(Dimethyl:2H(4)); T10(Hex); K14(Dimethyl:2H(4))	HCD	100000	1	0	1	1	Medium		790.704	2.47474e-77	8.50425e-80	0	2.38966	2	768.934	1536.86	0.00395103	79.4384
YGPMAGGTLLTLTGNYLNSGNSR	Hepatocyte growth factor receptor OS=Homo sapiens GN=MET PE=1 SV=4 - [MET_HUMAN]	P08581	N-Term(Dimethyl:2H(4)); M4(Oxidation); T11(Hex)	HCD	3932.88	1	0	1	1	Medium		279.747	6.79375e-26	1.05987e-28	0	8.61019	3	856.425	2567.26	0.00794896	108.337
YGPMAGGTLLTLTGNYLNSGNSR	Hepatocyte growth factor receptor OS=Homo sapiens GN=MET PE=1 SV=4 - [MET_HUMAN]	P08581	N-Term(Dimethyl:2H(4)); T8(Hex)	HCD	6634.2	1	0	1	1	Medium		289.425	7.49945e-27	1.14147e-29	0	0.679204	3	851.093	2551.26	-0.0234041	108.641
SFISGGSTITGVGK	Hepatocyte growth factor receptor OS=Homo sapiens GN=MET PE=1 SV=4 - [MET_HUMAN]	P08581	N-Term(Dimethyl:2H(4)); T8(Hex); K14(Dimethyl:2H(4))	HCD	3645.88	1	0	1	1	Medium		526.909	5.23618e-51	2.03742e-53	0	0	2	768.934	1536.86	-0.393191	81.9934
YGPMAGGTLLTLTGNYLNSGNSR	Hepatocyte growth factor receptor OS=Homo sapiens GN=MET PE=1 SV=4 - [MET_HUMAN]	P08581	N-Term(Dimethyl:2H(4)); T11(Hex)	HCD	15183.1	1	0	1	1	Medium		225.362	1.87057e-20	2.90913e-23	0	12.0078	3	851.093	2551.27	0.191907	108.729
GGGGNFGPGPGSNFR	Heterogeneous nuclear ribonucleoproteins A2/B1 OS=Homo sapiens GN=HNRNPA2B1 PE=1 SV=2 - [ROA2_HUMAN]	P22626	N-Term(Dimethyl:2H(4)); S12(Hex)	ETciD	0.714146	1	0	1	1	Medium	2.46882				0	40.9078	2	786.373	1571.74	0.118913	63.8168
GGGGNFGPGPGSNFR	Heterogeneous nuclear ribonucleoproteins A2/B1 OS=Homo sapiens GN=HNRNPA2B1 PE=1 SV=2 - [ROA2_HUMAN]	P22626	N-Term(Dimethyl); S12(Hex)	HCD	0.714146	1	0	1	1	Light		704.851	6.54558e-69	3.27279e-71	0	30.0944	2	784.361	1567.71	0.794818	63.8117
AGGTCLTLEGQSLSVGTSR	Macrophage-stimulating protein receptor OS=Homo sapiens GN=MST1R PE=1 SV=2 - [RON_HUMAN]	Q04912	N-Term(Dimethyl:2H(4)); C5(Carbamidomethyl); T7(Hex)	HCD	1201.98	1	0	1	1	Medium		554.867	1.17396e-53	3.26099e-56	0	0	2	1044.53	2088.04	0.69479	86.6721
FGSTADALVSDDETTR	Melanoma inhibitory activity protein 3 OS=Homo sapiens GN=MIA3 PE=1 SV=1 - [MIA3_HUMAN]	Q5JRA6	N-Term(Dimethyl); T4(Hex)	ETciD	1.20923	1	0	1	1	Light	2.61629				0	93.0541	2	937.928	1874.85	-0.449352	72.5969
TAELNVQVPEEPTHLDQR	Melanoma inhibitory activity protein 3 OS=Homo sapiens GN=MIA3 PE=1 SV=1 - [MIA3_HUMAN]	Q5JRA6	N-Term(Dimethyl); T1(Hex)	ETciD	0.763612	1	0	1	1	Light	3.92402				0	44.8554	3	756.045	2266.12	0.570403	84.0627
FGSTADALVSDDETTR	Melanoma inhibitory activity protein 3 OS=Homo sapiens GN=MIA3 PE=1 SV=1 - [MIA3_HUMAN]	Q5JRA6	N-Term(Dimethyl:2H(4)); T4(Hex)	ETciD	1.4453	1	0	1	1	Medium	2.14129				0	0	2	939.942	1878.88	0.287295	71.0158
TAELNVQVPEEPTHLDQR	Melanoma inhibitory activity protein 3 OS=Homo sapiens GN=MIA3 PE=1 SV=1 - [MIA3_HUMAN]	Q5JRA6	N-Term(Dimethyl); T1(Hex)	HCD	0.763612	1	0	1	1	Light		618.577	9.17381e-60	1.38787e-62	0	44.8554	3	756.045	2266.12	0.570403	84.0703
FGSTADALVSDDETTR	Melanoma inhibitory activity protein 3 OS=Homo sapiens GN=MIA3 PE=1 SV=1 - [MIA3_HUMAN]	Q5JRA6	N-Term(Dimethyl:2H(4)); T4(Hex)	HCD	1.4453	1	0	1	1	Medium		596.196	6.79487e-58	2.40101e-60	0	0	2	939.942	1878.88	0.287295	71.0275
FGSTADALVSDDETTR	Melanoma inhibitory activity protein 3 OS=Homo sapiens GN=MIA3 PE=1 SV=1 - [MIA3_HUMAN]	Q5JRA6	N-Term(Dimethyl:2H(4)); T4(Hex)	HCD	1.20923	1	0	1	1	Medium		575.229	8.13039e-56	3.00014e-58	0	39.8939	2	939.941	1878.88	0.0274152	72.4418
NVPTANPTEPGIR	Neurexin-3-beta OS=Homo sapiens GN=NRXN3 PE=1 SV=4 - [NRX3B_HUMAN]	Q9HDB5	N-Term(Dimethyl); T4(Hex)	ETciD	0.485889	1	0	1	1	Light	1.60666				0	16.457	2	778.402	1555.8	-0.14603	61.4293
NVPTANPTEPGIR	Neurexin-3-beta OS=Homo sapiens GN=NRXN3 PE=1 SV=4 - [NRX3B_HUMAN]	Q9HDB5	N-Term(Dimethyl); T4(Hex)	ETciD	1.30156	1	0	1	1	Light	1.80527				0	33.6833	2	778.401	1555.8	-0.459877	61.581
NVPTANPTEPGIR	Neurexin-3-beta OS=Homo sapiens GN=NRXN3 PE=1 SV=4 - [NRX3B_HUMAN]	Q9HDB5	N-Term(Dimethyl); T4(Hex)	ETciD	0.450832	1	0	1	1	Light	1.85072				0	19.0219	2	778.402	1555.8	-0.0675687	62.5914
NVPTANPTEPGIR	Neurexin-3-beta OS=Homo sapiens GN=NRXN3 PE=1 SV=4 - [NRX3B_HUMAN]	Q9HDB5	N-Term(Dimethyl:2H(4)); T4(Hex)	ETciD	1.23408	1	0	1	1	Medium	1.88288				0	17.4726	2	780.414	1559.82	-0.12034	60.5559
NVPTANPTEPGIR	Neurexin-3-beta OS=Homo sapiens GN=NRXN3 PE=1 SV=4 - [NRX3B_HUMAN]	Q9HDB5	N-Term(Dimethyl); T4(Hex)	HCD	1.23408	1	0	1	1	Light		347.422	7.04332e-33	1.81062e-35	0	5.77906	2	778.402	1555.8	-0.0675687	60.7303
NVPTANPTEPGIR	Neurexin-3-beta OS=Homo sapiens GN=NRXN3 PE=1 SV=4 - [NRX3B_HUMAN]	Q9HDB5	N-Term(Dimethyl); T4(Hex)	HCD	0.485889	1	0	1	1	Light		353.18	1.84623e-33	4.80789e-36	0	16.457	2	778.402	1555.8	-0.14603	61.4413
NVPTANPTEPGIR	Neurexin-3-beta OS=Homo sapiens GN=NRXN3 PE=1 SV=4 - [NRX3B_HUMAN]	Q9HDB5	N-Term(Dimethyl); T4(Hex)	HCD	1.30156	1	0	1	1	Light		316.951	8.1721e-30	2.0178e-32	0	33.6833	2	778.401	1555.8	-0.459877	61.5886
NVPTANPTEPGIR	Neurexin-3-beta OS=Homo sapiens GN=NRXN3 PE=1 SV=4 - [NRX3B_HUMAN]	Q9HDB5	N-Term(Dimethyl); T4(Hex)	HCD	0.450832	1	0	1	1	Light		339.259	4.61382e-32	1.18607e-34	0	19.0219	2	778.402	1555.8	-0.0675687	62.5992
MCENTEPVETSSR	Plexin domain-containing protein 2 OS=Homo sapiens GN=PLXDC2 PE=1 SV=1 - [PXDC2_HUMAN]	Q6UX71	N-Term(Dimethyl); C2(Carbamidomethyl); T10(Hex)	HCD	0.659621	1	0	1	1	Light		352.816	2.92787e-34	5.22833e-36	0	0	2	865.365	1729.72	-1.38009	45.413
QGGTRLTITGENLGLR	Plexin-A1 OS=Homo sapiens GN=PLXNA1 PE=1 SV=3 - [PLXA1_HUMAN]	Q9UIW2	N-Term(Dimethyl:2H(4)); T7(Hex)	ETciD	55.8133	1	0	1	1	Medium	5.32233				1	32.3205	3	627.351	1880.04	-0.0723385	80.3393
LTITGENLGLR	Plexin-A1 OS=Homo sapiens GN=PLXNA1 PE=1 SV=3 - [PLXA1_HUMAN]	Q9UIW2	N-Term(Dimethyl:2H(4)); T2(Hex)	ETciD	100000	1	0	1	1	Medium	2.02956				0	19.5779	2	690.898	1380.79	-0.0338165	90.6497
QGGTRLTITGENLGLR	Plexin-A1 OS=Homo sapiens GN=PLXNA1 PE=1 SV=3 - [PLXA1_HUMAN]	Q9UIW2	N-Term(Dimethyl:2H(4)); T7(Hex)	ETciD	13900.1	1	0	1	1	Medium	4.39591				1	18.4681	3	627.351	1880.04	0.122451	84.4068
QGGTRLTITGENLGLR	Plexin-A1 OS=Homo sapiens GN=PLXNA1 PE=1 SV=3 - [PLXA1_HUMAN]	Q9UIW2	N-Term(Dimethyl:2H(4)); T7(Hex)	ETciD	3622.87	1	0	1	1	Medium	4.87143				1	44.5223	3	627.351	1880.04	-0.559311	84.8531
LTITGENLGLR	Plexin-A1 OS=Homo sapiens GN=PLXNA1 PE=1 SV=3 - [PLXA1_HUMAN]	Q9UIW2	N-Term(Dimethyl:2H(4)); T2(Hex)	ETciD	258.987	1	0	1	1	Medium	1.54681				0	22.6161	2	690.898	1380.79	-0.0338165	93.0858
LTITGENLGLR	Plexin-A1 OS=Homo sapiens GN=PLXNA1 PE=1 SV=3 - [PLXA1_HUMAN]	Q9UIW2	N-Term(Dimethyl:2H(4)); T2(Hex)	ETciD	177.887	1	0	1	1	Medium	1.79976				0	1.28697	2	690.898	1380.79	0.408215	93.4467
LTITGENLGLR	Plexin-A1 OS=Homo sapiens GN=PLXNA1 PE=1 SV=3 - [PLXA1_HUMAN]	Q9UIW2	N-Term(Dimethyl:2H(4)); T2(Hex)	ETciD	54660.8	1	0	1	1	Medium	2.04612				0	2.37461	2	690.898	1380.79	0.231402	93.8223
QGGTRLTITGENLGLR	Plexin-A1 OS=Homo sapiens GN=PLXNA1 PE=1 SV=3 - [PLXA1_HUMAN]	Q9UIW2	N-Term(Dimethyl:2H(4)); T4(Hex)	HCD	55.8133	1	0	1	1	Medium		365.641	7.8853e-35	2.72848e-37	1	32.3205	3	627.351	1880.04	-0.0723385	80.3497
LTITGENLGLR	Plexin-A1 OS=Homo sapiens GN=PLXNA1 PE=1 SV=3 - [PLXA1_HUMAN]	Q9UIW2	N-Term(Dimethyl:2H(4)); T2(Hex)	HCD	152.375	1	0	1	1	Medium		449.104	3.97025e-43	1.22918e-45	0	0.965288	2	690.898	1380.79	0.142996	91.048
QGGTRLTITGENLGLR	Plexin-A1 OS=Homo sapiens GN=PLXNA1 PE=1 SV=3 - [PLXA1_HUMAN]	Q9UIW2	N-Term(Dimethyl:2H(4)); T7(Hex)	HCD	3622.87	1	0	1	1	Medium		268.508	3.97644e-25	1.41009e-27	1	44.5223	3	627.351	1880.04	-0.559311	84.8652
LTITGENLGLR	Plexin-A1 OS=Homo sapiens GN=PLXNA1 PE=1 SV=3 - [PLXA1_HUMAN]	Q9UIW2	N-Term(Dimethyl:2H(4)); T2(Hex)	HCD	177.887	1	0	1	1	Medium		432.726	1.58017e-41	5.33842e-44	0	1.28697	2	690.898	1380.79	0.408215	93.4579
LTITGENLGLR	Plexin-A1 OS=Homo sapiens GN=PLXNA1 PE=1 SV=3 - [PLXA1_HUMAN]	Q9UIW2	N-Term(Dimethyl:2H(4)); T2(Hex)	HCD	54660.8	1	0	1	1	Medium		443.45	1.45056e-42	4.51889e-45	0	2.37461	2	690.898	1380.79	0.231402	93.8347
SGGTLLTVTGTNLATVR	Plexin-A1 OS=Homo sapiens GN=PLXNA1 PE=1 SV=3 - [PLXA1_HUMAN]	Q9UIW2	N-Term(Dimethyl:2H(4)); T4(Hex)	HCD	717.551	1	0	1	1	Medium		292.094	2.59698e-26	6.17446e-30	0	26.7678	2	928.02	1855.03	0.800328	93.9539
LTISGSSLDAGSR	Plexin-A3 OS=Homo sapiens GN=PLXNA3 PE=1 SV=2 - [PLXA3_HUMAN]	P51805	N-Term(Dimethyl:2H(4)); T2(Hex)	ETciD	100000	1	0	1	1	Medium	2.15386				0	13.754	2	729.385	1457.76	0.264174	72.3489
EGGTRVTIVGDNLGLLSR	Plexin-A3 OS=Homo sapiens GN=PLXNA3 PE=1 SV=2 - [PLXA3_HUMAN]	P51805	N-Term(Dimethyl:2H(4)); T7(Hex)	ETciD	1379.77	1	0	1	1	Medium	4.65585				1	13.8092	3	684.381	2051.13	0.101791	95.6202
EGGTRVTIVGDNLGLLSR	Plexin-A3 OS=Homo sapiens GN=PLXNA3 PE=1 SV=2 - [PLXA3_HUMAN]	P51805	N-Term(Dimethyl:2H(4)); T7(Hex)	ETciD	2309.57	1	0	1	1	Medium	3.37923				1	7.03317	3	684.381	2051.13	0.280332	96.254
VTIVGDNLGLLSR	Plexin-A3 OS=Homo sapiens GN=PLXNA3 PE=1 SV=2 - [PLXA3_HUMAN]	P51805	N-Term(Dimethyl:2H(4)); T2(Hex)	ETciD	12556.2	1	0	1	1	Medium	2.05801				0	0	2	775.951	1550.9	0.789757	104.284
VTIVGDNLGLLSR	Plexin-A3 OS=Homo sapiens GN=PLXNA3 PE=1 SV=2 - [PLXA3_HUMAN]	P51805	N-Term(Dimethyl:2H(4)); T2(Hex)	ETciD	8186.08	1	0	1	1	Medium	1.70456				0	33.0863	2	775.951	1550.89	-0.0760487	107.796
LTISGSSLDAGSR	Plexin-A3 OS=Homo sapiens GN=PLXNA3 PE=1 SV=2 - [PLXA3_HUMAN]	P51805	N-Term(Dimethyl:2H(4)); T2(Hex)	HCD	100000	1	0	1	1	Medium		488.553	5.3862e-47	1.39539e-49	0	13.754	2	729.385	1457.76	0.264174	72.3597
EGGTRVTIVGDNLGLLSR	Plexin-A3 OS=Homo sapiens GN=PLXNA3 PE=1 SV=2 - [PLXA3_HUMAN]	P51805	N-Term(Dimethyl:2H(4)); T7(Hex)	HCD	1379.77	1	0	1	1	Medium		371.054	2.55744e-35	7.8449e-38	1	13.8092	3	684.381	2051.13	0.101791	95.6325
EGGTRVTIVGDNLGLLSR	Plexin-A3 OS=Homo sapiens GN=PLXNA3 PE=1 SV=2 - [PLXA3_HUMAN]	P51805	N-Term(Dimethyl:2H(4)); T7(Hex)	HCD	2309.57	1	0	1	1	Medium		292.24	1.94611e-27	5.96967e-30	1	7.03317	3	684.381	2051.13	0.280332	96.2648
VTIVGDNLGLLSR	Plexin-A3 OS=Homo sapiens GN=PLXNA3 PE=1 SV=2 - [PLXA3_HUMAN]	P51805	N-Term(Dimethyl:2H(4)); T2(Hex)	HCD	12556.2	1	0	1	1	Medium		502.749	1.3541e-48	5.3102e-51	0	0	2	775.951	1550.9	0.789757	104.295
VTIVGDNLGLLSR	Plexin-A3 OS=Homo sapiens GN=PLXNA3 PE=1 SV=2 - [PLXA3_HUMAN]	P51805	N-Term(Dimethyl:2H(4)); T2(Hex)	HCD	8186.08	1	0	1	1	Medium		499.756	2.97264e-48	1.05788e-50	0	33.0863	2	775.951	1550.89	-0.0760487	107.804
EGGTKVTIR	Plexin-A4 OS=Homo sapiens GN=PLXNA4 PE=1 SV=4 - [PLXA4_HUMAN]	Q9HCM2	N-Term(Dimethyl:2H(4)); K5(Dimethyl:2H(4)); T7(Hex)	ETciD	8949.32	1	0	1	1	Medium	2.3756				1	61.735	3	396.242	1186.71	-0.260536	35.8109
LTLNGSK	Plexin-B1 OS=Homo sapiens GN=PLXNB1 PE=1 SV=3 - [PLXB1_HUMAN]	O43157	N-Term(Dimethyl:2H(4)); T2(Hex); K7(Dimethyl:2H(4))	ETciD	19890.6	1	0	1	1	Medium	1.63696				0	47.7176	2	479.799	958.591	-0.142464	44.5755
LTLNGSK	Plexin-B1 OS=Homo sapiens GN=PLXNB1 PE=1 SV=3 - [PLXB1_HUMAN]	O43157	N-Term(Dimethyl:2H(4)); T2(Hex); K7(Dimethyl:2H(4))	HCD	19890.6	1	0	1	1	Medium		193.076	1.29532e-17	4.92518e-20	0	47.7176	2	479.799	958.591	-0.142464	44.5869
SPPNVQFTFQQPKPLSVEPQQGPQAGGTTLTIHGTHLDTGSQEDVR	Plexin-B2 OS=Homo sapiens GN=PLXNB2 PE=1 SV=3 - [PLXB2_HUMAN]	O15031	N-Term(Dimethyl:2H(4)); K13(Dimethyl:2H(4)); T31(Hex)	ETciD	582.808	1	0	1	1	Medium	4.03479				0	11.0851	5	1031.13	5151.61	0.124879	105.405
ITILGSNLGVQAGDIQR	Plexin-B2 OS=Homo sapiens GN=PLXNB2 PE=1 SV=3 - [PLXB2_HUMAN]	O15031	N-Term(Dimethyl:2H(4)); T2(Hex)	ETciD	63607.7	1	0	1	1	Medium	5.28513				0	5.94855	3	650.367	1949.09	1.0005	105.7
SPPNVQFTFQQPKPLSVEPQQGPQAGGTTLTIHGTHLDTGSQEDVR	Plexin-B2 OS=Homo sapiens GN=PLXNB2 PE=1 SV=3 - [PLXB2_HUMAN]	O15031	N-Term(Dimethyl:2H(4)); K13(Dimethyl:2H(4)); T31(Hex)	ETciD	1658.7	1	0	1	1	Medium	5.714				0	44.6369	5	1031.13	5151.61	0.480313	107.135
TLTETDLYCEPPEVQPPPK	Plexin-B2 OS=Homo sapiens GN=PLXNB2 PE=1 SV=3 - [PLXB2_HUMAN]	O15031	N-Term(Dimethyl:2H(4)); T1(Hex); C9(Carbamidomethyl); K19(Dimethyl:2H(4))	ETciD	0.301512	1	0	1	1	Medium	3.85822				0	31.0204	3	814.082	2440.23	0.432525	93.7093
SPPNVQFTFQQPKPLSVEPQQGPQAGGTTLTIHGTHLDTGSQEDVR	Plexin-B2 OS=Homo sapiens GN=PLXNB2 PE=1 SV=3 - [PLXB2_HUMAN]	O15031	N-Term(Dimethyl:2H(4)); K13(Dimethyl:2H(4)); T31(Hex)	ETciD	8151.49	1	0	1	1	Medium	9.46078				0	1.42582	5	1031.13	5151.61	0.0064017	107.38
ITILGSNLGVQAGDIQR	Plexin-B2 OS=Homo sapiens GN=PLXNB2 PE=1 SV=3 - [PLXB2_HUMAN]	O15031	N-Term(Dimethyl:2H(4)); T2(Hex)	ETciD	78162.4	1	0	1	1	Medium	5.16385				0	28.0226	3	650.367	1949.09	0.718664	107.889
QGPQAGGTTLTIHGTHLDTGSQEDVR	Plexin-B2 OS=Homo sapiens GN=PLXNB2 PE=1 SV=3 - [PLXB2_HUMAN]	O15031	N-Term(Dimethyl:2H(4)); T11(Hex)	ETciD	3054.26	1	0	1	1	Medium	6.37845				0	81.8417	4	718.356	2870.4	-1.16128	68.0246
SVEPQQGPQAGGTTLTIHGTHLDTGSQEDVR	Plexin-B2 OS=Homo sapiens GN=PLXNB2 PE=1 SV=3 - [PLXB2_HUMAN]	O15031	N-Term(Dimethyl:2H(4)); T16(Hex)	ETciD	26336	1	0	1	1	Medium	8.26245				0	0	4	853.421	3410.66	-0.191539	73.4099
SVEPQQGPQAGGTTLTIHGTHLDTGSQEDVR	Plexin-B2 OS=Homo sapiens GN=PLXNB2 PE=1 SV=3 - [PLXB2_HUMAN]	O15031	N-Term(Dimethyl:2H(4)); T16(Hex)	ETciD	4585.44	1	0	1	1	Medium	7.4559				0	41.7862	4	853.42	3410.66	-1.33685	77.5093
SVEPQQGPQAGGTTLTIHGTHLDTGSQEDVR	Plexin-B2 OS=Homo sapiens GN=PLXNB2 PE=1 SV=3 - [PLXB2_HUMAN]	O15031	N-Term(Dimethyl:2H(4)); T16(Hex)	ETciD	382.487	1	0	1	1	Medium	4.02428				0	35.1018	4	853.421	3410.66	0.66744	78.2817
TLTETDLYCEPPEVQPPPK	Plexin-B2 OS=Homo sapiens GN=PLXNB2 PE=1 SV=3 - [PLXB2_HUMAN]	O15031	T1(Hex); N-Term(Dimethyl); C9(Carbamidomethyl); K19(Dimethyl)	HCD	0.301512	1	0	1	1	Light		599.174	7.59538e-58	1.20946e-60	0	17.6129	3	811.398	2432.18	0.276015	93.5401
ITILGSNLGVQAGDIQR	Plexin-B2 OS=Homo sapiens GN=PLXNB2 PE=1 SV=3 - [PLXB2_HUMAN]	O15031	N-Term(Dimethyl:2H(4)); T2(Hex)	HCD	75377.9	1	0	1	1	Medium		348.367	4.03424e-33	1.45641e-35	0	34.4612	2	975.046	1949.09	0.00532397	105.674
ITILGSNLGVQAGDIQR	Plexin-B2 OS=Homo sapiens GN=PLXNB2 PE=1 SV=3 - [PLXB2_HUMAN]	O15031	N-Term(Dimethyl:2H(4)); T2(Hex)	HCD	536.787	1	0	1	1	Medium		271.788	1.78238e-25	6.62593e-28	0	3.04206	2	975.048	1949.09	2.19735	106.072
ITILGSNLGVQAGDIQR	Plexin-B2 OS=Homo sapiens GN=PLXNB2 PE=1 SV=3 - [PLXB2_HUMAN]	O15031	N-Term(Dimethyl:2H(4)); T2(Hex)	HCD	205.807	1	0	1	1	Medium		928.772	3.51629e-91	1.3269e-93	0	8.88892	3	650.367	1949.09	0.436832	106.109
SPPNVQFTFQQPKPLSVEPQQGPQAGGTTLTIHGTHLDTGSQEDVR	Plexin-B2 OS=Homo sapiens GN=PLXNB2 PE=1 SV=3 - [PLXB2_HUMAN]	O15031	N-Term(Dimethyl:2H(4)); K13(Dimethyl:2H(4)); T28(Hex)	HCD	582.808	1	0	1	1	Medium		206.709	9.17456e-19	2.13362e-21	0	11.0851	5	1031.13	5151.61	0.124879	105.414
SPPNVQFTFQQPKPLSVEPQQGPQAGGTTLTIHGTHLDTGSQEDVR	Plexin-B2 OS=Homo sapiens GN=PLXNB2 PE=1 SV=3 - [PLXB2_HUMAN]	O15031	N-Term(Dimethyl:2H(4)); K13(Dimethyl:2H(4)); T28(Hex)	HCD	1658.7	1	0	1	1	Medium		211.276	3.18259e-19	7.45337e-22	0	44.6369	5	1031.13	5151.61	0.480313	107.146
SPPNVQFTFQQPKPLSVEPQQGPQAGGTTLTIHGTHLDTGSQEDVR	Plexin-B2 OS=Homo sapiens GN=PLXNB2 PE=1 SV=3 - [PLXB2_HUMAN]	O15031	N-Term(Dimethyl:2H(4)); K13(Dimethyl:2H(4)); T28(Hex)	HCD	8151.49	1	0	1	1	Medium		555.151	1.28897e-53	3.05442e-56	0	1.42582	5	1031.13	5151.61	0.0064017	107.393
ITILGSNLGVQAGDIQR	Plexin-B2 OS=Homo sapiens GN=PLXNB2 PE=1 SV=3 - [PLXB2_HUMAN]	O15031	N-Term(Dimethyl:2H(4)); T2(Hex)	HCD	100000	1	0	1	1	Medium		812.801	1.41151e-79	5.24725e-82	0	28.7282	2	975.047	1949.09	0.255842	107.894
ITILGSNLGVQAGDIQR	Plexin-B2 OS=Homo sapiens GN=PLXNB2 PE=1 SV=3 - [PLXB2_HUMAN]	O15031	N-Term(Dimethyl:2H(4)); T2(Hex)	HCD	78162.4	1	0	1	1	Medium		800.791	2.2503e-78	8.33444e-81	0	28.0226	3	650.367	1949.09	0.718664	107.903
QGPQAGGTTLTIHGTHLDTGSQEDVR	Plexin-B2 OS=Homo sapiens GN=PLXNB2 PE=1 SV=3 - [PLXB2_HUMAN]	O15031	N-Term(Dimethyl:2H(4)); T15(Hex)	HCD	3054.26	1	0	1	1	Medium		447.392	2.08612e-41	1.82289e-45	0	81.8417	4	718.356	2870.4	-1.16128	68.0323
SVEPQQGPQAGGTTLTIHGTHLDTGSQEDVR	Plexin-B2 OS=Homo sapiens GN=PLXNB2 PE=1 SV=3 - [PLXB2_HUMAN]	O15031	N-Term(Dimethyl:2H(4)); T16(Hex)	HCD	26336	1	0	1	1	Medium		672.541	7.01226e-64	5.57059e-68	0	0.869845	4	853.42	3410.66	-0.477865	73.0395
SVEPQQGPQAGGTTLTIHGTHLDTGSQEDVR	Plexin-B2 OS=Homo sapiens GN=PLXNB2 PE=1 SV=3 - [PLXB2_HUMAN]	O15031	N-Term(Dimethyl:2H(4)); T16(Hex)	HCD	4585.44	1	0	1	1	Medium		558.954	1.59953e-52	1.27239e-56	0	41.7862	4	853.42	3410.66	-1.33685	77.5181
SGPLDGGTLLTIR	Plexin-D1 OS=Homo sapiens GN=PLXND1 PE=1 SV=3 - [PLXD1_HUMAN]	Q9Y4D7	N-Term(Dimethyl:2H(4)); T11(Hex)	ETciD	5494.46	1	0	1	1	Medium	2.20488				0	0	2	747.422	1493.84	-0.168253	98.8724
AIEPLSGPLDGGTLLTIR	Plexin-D1 OS=Homo sapiens GN=PLXND1 PE=1 SV=3 - [PLXD1_HUMAN]	Q9Y4D7	N-Term(Dimethyl:2H(4)); T16(Hex)	ETciD	18043.9	1	0	1	1	Medium	2.15014				0	0.945915	2	1009.07	2017.14	0.131929	108.749
SGPLDGGTLLTIR	Plexin-D1 OS=Homo sapiens GN=PLXND1 PE=1 SV=3 - [PLXD1_HUMAN]	Q9Y4D7	N-Term(Dimethyl:2H(4)); T11(Hex)	HCD	5494.46	1	0	1	1	Medium		541.025	3.21821e-51	7.89746e-55	0	0	2	747.422	1493.84	-0.168253	98.8859
AIEPLSGPLDGGTLLTIR	Plexin-D1 OS=Homo sapiens GN=PLXND1 PE=1 SV=3 - [PLXD1_HUMAN]	Q9Y4D7	N-Term(Dimethyl:2H(4)); T13(Hex)	HCD	10778.3	1	0	1	1	Medium		295.102	1.04254e-26	3.08901e-30	0	1.87887	2	1009.07	2017.14	0.131929	108.672
AIEPLSGPLDGGTLLTIR	Plexin-D1 OS=Homo sapiens GN=PLXND1 PE=1 SV=3 - [PLXD1_HUMAN]	Q9Y4D7	N-Term(Dimethyl:2H(4)); T13(Hex)	HCD	18043.9	1	0	1	1	Medium		448.027	5.3155e-42	1.57496e-45	0	0.945915	2	1009.07	2017.14	0.131929	108.759
VDCTANTNTCNK	Protein disulfide-isomerase A3 OS=Homo sapiens GN=PDIA3 PE=1 SV=4 - [PDIA3_HUMAN]	P30101	N-Term(Dimethyl); C3(Carbamidomethyl); T7(Hex); C10(Carbamidomethyl); K12(Dimethyl)	ETciD	0.956573	1	0	1	1	Light	1.62478				0	7.33364	2	808.351	1615.69	0.0197779	29.9585
VDCTANTNTCNKYGVSGYPTLK	Protein disulfide-isomerase A3 OS=Homo sapiens GN=PDIA3 PE=1 SV=4 - [PDIA3_HUMAN]	P30101	N-Term(Dimethyl); C3(Carbamidomethyl); C10(Carbamidomethyl); K12(Dimethyl); S16(Hex); K22(Dimethyl)	ETciD	0.119558	1	0	1	1	Light	4.49294				1	0.596381	3	903.763	2709.28	0.386322	73.2347
YGVSGYPTLK	Protein disulfide-isomerase A3 OS=Homo sapiens GN=PDIA3 PE=1 SV=4 - [PDIA3_HUMAN]	P30101	N-Term(Dimethyl); S4(Hex); K10(Dimethyl)	ETciD	1.81111	1	0	1	1	Light	2.33076				0	0.249735	2	651.846	1302.68	1.4068	74.1279
GVSGYPTLK	Protein disulfide-isomerase A3 OS=Homo sapiens GN=PDIA3 PE=1 SV=4 - [PDIA3_HUMAN]	P30101	N-Term(Dimethyl); S3(Hex); K9(Dimethyl)	ETciD	1.06794	1	0	1	1	Light	2.20282				0	6.58759	2	570.313	1139.62	0.185329	62.1613
YGVSGYPTLK	Protein disulfide-isomerase A3 OS=Homo sapiens GN=PDIA3 PE=1 SV=4 - [PDIA3_HUMAN]	P30101	N-Term(Dimethyl:2H(4)); S4(Hex); K10(Dimethyl:2H(4))	ETciD	1.63113	1	0	1	1	Medium	2.41957				0	2.74045	2	655.87	1310.73	-0.776747	76.0043
YGVSGYPTLK	Protein disulfide-isomerase A3 OS=Homo sapiens GN=PDIA3 PE=1 SV=4 - [PDIA3_HUMAN]	P30101	N-Term(Dimethyl:2H(4)); S4(Hex); K10(Dimethyl:2H(4))	ETciD	0.944099	1	0	1	1	Medium	2.56575				0	5.06248	2	655.87	1310.73	0.340829	79.4771
KYGVSGYPTLK	Protein disulfide-isomerase A3 OS=Homo sapiens GN=PDIA3 PE=1 SV=4 - [PDIA3_HUMAN]	P30101	N-Term(Dimethyl:2H(4)); K1(Dimethyl:2H(4)); S5(Hex); K11(Dimethyl:2H(4))	ETciD	0.683238	1	0	1	1	Medium	2.01421				1	9.05079	2	735.946	1470.88	-0.0349161	66.0373
VDCTANTNTCNK	Protein disulfide-isomerase A3 OS=Homo sapiens GN=PDIA3 PE=1 SV=4 - [PDIA3_HUMAN]	P30101	N-Term(Dimethyl); C3(Carbamidomethyl); T9(Hex); C10(Carbamidomethyl); K12(Dimethyl)	HCD	0.956573	1	0	1	1	Light		648.689	1.48774e-63	1.35249e-65	0	7.33364	2	808.351	1615.69	0.0197779	29.9707
YGVSGYPTLK	Protein disulfide-isomerase A3 OS=Homo sapiens GN=PDIA3 PE=1 SV=4 - [PDIA3_HUMAN]	P30101	N-Term(Dimethyl); T8(Hex); K10(Dimethyl)	HCD	1.81111	1	0	1	1	Light		438.084	4.58553e-42	1.55442e-44	0	0.249735	2	651.846	1302.68	1.4068	74.1374
VDCTANTNTCNK	Protein disulfide-isomerase A3 OS=Homo sapiens GN=PDIA3 PE=1 SV=4 - [PDIA3_HUMAN]	P30101	N-Term(Dimethyl); C3(Carbamidomethyl); T9(Hex); C10(Carbamidomethyl); K12(Dimethyl)	HCD	1.06846	1	0	1	1	Light		639.582	1.20002e-62	1.10094e-64	0	5.73968	2	808.351	1615.69	-0.055775	30.3907
YGVSGYPTLK	Protein disulfide-isomerase A3 OS=Homo sapiens GN=PDIA3 PE=1 SV=4 - [PDIA3_HUMAN]	P30101	N-Term(Dimethyl); T8(Hex); K10(Dimethyl)	HCD	1.63113	1	0	1	1	Light		463.576	1.23779e-44	4.38932e-47	0	32.6717	2	651.845	1302.68	-0.561047	75.9962
GVSGYPTLK	Protein disulfide-isomerase A3 OS=Homo sapiens GN=PDIA3 PE=1 SV=4 - [PDIA3_HUMAN]	P30101	N-Term(Dimethyl); T7(Hex); K9(Dimethyl)	HCD	1.06794	1	0	1	1	Light		376.078	9.7883e-35	2.46743e-38	0	6.58759	2	570.313	1139.62	0.185329	62.1693
YGVSGYPTLK	Protein disulfide-isomerase A3 OS=Homo sapiens GN=PDIA3 PE=1 SV=4 - [PDIA3_HUMAN]	P30101	N-Term(Dimethyl:2H(4)); S4(Hex); T8(Hex); K10(Dimethyl:2H(4))	HCD	0.983839	1	0	1	1	Medium		218.076	5.59079e-20	1.55732e-22	0	17.4453	2	736.897	1472.79	-0.00617855	73.0781
YGVSGYPTLK	Protein disulfide-isomerase A3 OS=Homo sapiens GN=PDIA3 PE=1 SV=4 - [PDIA3_HUMAN]	P30101	N-Term(Dimethyl:2H(4)); S4(Hex); T8(Hex); K10(Dimethyl:2H(4))	HCD	0.332449	1	0	1	1	Medium		278.446	5.20639e-26	1.43033e-28	0	51.533	2	736.896	1472.79	-0.171946	74.9436
YGVSGYPTLK	Protein disulfide-isomerase A3 OS=Homo sapiens GN=PDIA3 PE=1 SV=4 - [PDIA3_HUMAN]	P30101	N-Term(Dimethyl:2H(4)); T8(Hex); K10(Dimethyl:2H(4))	HCD	0.944099	1	0	1	1	Medium		425.88	8.08335e-41	2.58254e-43	0	9.13627	2	655.87	1310.73	-0.31109	79.8281
YGVSGYPTLK	Protein disulfide-isomerase A3 OS=Homo sapiens GN=PDIA3 PE=1 SV=4 - [PDIA3_HUMAN]	P30101	N-Term(Dimethyl:2H(4)); S4(Hex); K10(Dimethyl:2H(4))	HCD	0.984973	1	0	1	1	Medium		343.515	1.36209e-32	4.45129e-35	0	27.6414	2	655.87	1310.73	0.0614353	82.5654
YGVSGYPTLK	Protein disulfide-isomerase A3 OS=Homo sapiens GN=PDIA3 PE=1 SV=4 - [PDIA3_HUMAN]	P30101	N-Term(Dimethyl:2H(4)); T8(Hex); K10(Dimethyl:2H(4))	HCD	0.184756	1	0	1	1	Medium		210.217	2.91061e-19	9.5118e-22	0	44.8356	2	655.87	1310.73	0.154567	83.2491
FDVSGYPTIK	Protein disulfide-isomerase A4 OS=Homo sapiens GN=PDIA4 PE=1 SV=2 - [PDIA4_HUMAN]	P13667	N-Term(Dimethyl); S4(Hex); K10(Dimethyl)	ETciD	0.64763	1	0	1	1	Light	1.637				0	30.7674	2	672.85	1344.69	0.21255	86.608
FDVSGYPTIK	Protein disulfide-isomerase A4 OS=Homo sapiens GN=PDIA4 PE=1 SV=2 - [PDIA4_HUMAN]	P13667	N-Term(Dimethyl); T8(Hex); K10(Dimethyl)	HCD	0.64763	1	0	1	1	Light		259.898	2.85642e-24	1.02381e-26	0	30.7674	2	672.85	1344.69	0.21255	86.6208
SGTAQISVR	Protocadherin alpha-C2 OS=Homo sapiens GN=PCDHAC2 PE=2 SV=1 - [PCDC2_HUMAN]	Q9Y5I4	N-Term(Dimethyl); S1(Hex); T3(Hex)	HCD	0.887445	1	0	1	1	Light		373.808	1.49802e-35	4.16116e-38	0	4.54523	2	635.823	1270.64	0.341255	39.6573
SGTAQISVR	Protocadherin alpha-C2 OS=Homo sapiens GN=PCDHAC2 PE=2 SV=1 - [PCDC2_HUMAN]	Q9Y5I4	N-Term(Dimethyl); S1(Hex); T3(Hex)	HCD	0.819712	1	0	1	1	Light		326.036	8.96756e-31	2.49099e-33	0	17.3525	2	635.823	1270.64	0.341255	39.9374
SGTAQISVR	Protocadherin alpha-C2 OS=Homo sapiens GN=PCDHAC2 PE=2 SV=1 - [PCDC2_HUMAN]	Q9Y5I4	N-Term(Dimethyl); S1(Hex); T3(Hex)	HCD	0.874188	1	0	1	1	Light		303.624	1.56265e-28	4.34068e-31	0	11.2828	2	635.822	1270.64	0.245185	40.2918
SGTALVR	Protocadherin beta-7 OS=Homo sapiens GN=PCDHB7 PE=2 SV=1 - [PCDB7_HUMAN]	Q9Y5E2	N-Term(Dimethyl); S1(Hex); T3(Hex)	HCD	0.458105	1	0	1	1	Light		283.471	1.35797e-26	4.4966e-29	0	1.36381	2	528.277	1055.55	0.442841	31.0202
SGTALVR	Protocadherin beta-7 OS=Homo sapiens GN=PCDHB7 PE=2 SV=1 - [PCDB7_HUMAN]	Q9Y5E2	N-Term(Dimethyl); T3(Hex)	HCD	0.423555	1	0	1	1	Light		248.174	8.02467e-23	1.52271e-25	0	34.3866	2	447.251	893.494	0.00867154	31.0617
SGTALVR	Protocadherin beta-7 OS=Homo sapiens GN=PCDHB7 PE=2 SV=1 - [PCDB7_HUMAN]	Q9Y5E2	N-Term(Dimethyl); S1(Hex); T3(Hex)	HCD	0.453572	1	0	1	1	Light		257.491	4.84678e-24	1.78191e-26	0	10.5918	2	528.277	1055.55	-0.0197451	31.421
GSPALSSEALVR	Protocadherin beta-7 OS=Homo sapiens GN=PCDHB7 PE=2 SV=1 - [PCDB7_HUMAN]|Protocadherin beta-6 OS=Homo sapiens GN=PCDHB6 PE=1 SV=1 - [PCDB6_HUMAN]|Protocadherin beta-14 OS=Homo sapiens GN=PCDHB14 PE=2 SV=1 - [PCDBE_HUMAN]	Q9Y5E2;Q9Y5E3;Q9Y5E9	N-Term(Dimethyl); S6(Hex)	HCD	0.39009	1	0	1	1	Light		453.123	1.55885e-43	4.87141e-46	0	15.2572	2	688.867	1376.73	0.382952	66.7989
EDAPVGSLVMTVSAHDEDAR	Protocadherin Fat 1 OS=Homo sapiens GN=FAT1 PE=1 SV=2 - [FAT1_HUMAN]	Q14517	N-Term(Dimethyl); S13(Hex)	ETciD	1.09421	1	0	1	1	Light	3.32526				0	73.2854	3	763.69	2289.06	0.104311	89.1672
DVSVVQIEAFDPDSSSNDKLMYK	Protocadherin Fat 1 OS=Homo sapiens GN=FAT1 PE=1 SV=2 - [FAT1_HUMAN]	Q14517	N-Term(Dimethyl); S3(Hex); K19(Dimethyl); M21(Oxidation); K23(Dimethyl)	ETciD	0.208755	1	0	1	1	Light	4.22862				1	18.6171	3	950.46	2849.37	0.251099	106.42
EDAPVGSLVMTVSAHDEDAR	Protocadherin Fat 1 OS=Homo sapiens GN=FAT1 PE=1 SV=2 - [FAT1_HUMAN]	Q14517	N-Term(Dimethyl:2H(4)); S13(Hex)	HCD	1.09421	1	0	1	1	Medium		872.636	2.1253e-85	5.4495e-88	0	37.2661	3	765.031	2293.08	-0.251292	89.2111
DVSVIQIQAEDPDSSSNEK	Protocadherin Fat 3 OS=Homo sapiens GN=FAT3 PE=2 SV=2 - [FAT3_HUMAN]	Q8TDW7	N-Term(Dimethyl); S3(Hex); K19(Dimethyl)	ETciD	0.410678	1	0	1	1	Light	5.87422				0	2.96018	3	760.364	2279.08	0.375102	82.892
DVSVIQIQAEDPDSSSNEK	Protocadherin Fat 3 OS=Homo sapiens GN=FAT3 PE=2 SV=2 - [FAT3_HUMAN]	Q8TDW7	N-Term(Dimethyl); S3(Hex); K19(Dimethyl)	ETciD	0.4282	1	0	1	1	Light	1.77762				0	7.4454	2	1140.04	2279.08	0.782711	82.9808
IGTSVLQVTAR	Protocadherin Fat 3 OS=Homo sapiens GN=FAT3 PE=2 SV=2 - [FAT3_HUMAN]	Q8TDW7	N-Term(Dimethyl); T3(Hex); T9(Hex)	ETciD	0.616559	1	0	1	1	Light	1.92392				0	11.0809	2	748.906	1496.81	-0.150935	70.4562
IGTSVLQVTAR	Protocadherin Fat 3 OS=Homo sapiens GN=FAT3 PE=2 SV=2 - [FAT3_HUMAN]	Q8TDW7	N-Term(Dimethyl:2H(4)); T3(Hex); T9(Hex)	ETciD	0.609747	1	0	1	1	Medium	2.16805				0	28.9211	2	750.919	1500.83	-0.205557	68.6408
IGTSVLQVTAR	Protocadherin Fat 3 OS=Homo sapiens GN=FAT3 PE=2 SV=2 - [FAT3_HUMAN]	Q8TDW7	N-Term(Dimethyl:2H(4)); T9(Hex)	ETciD	0.513362	1	0	1	1	Medium	2.63214				0	16.474	2	669.892	1338.78	-0.163493	73.3444
IGTSVLQVTAR	Protocadherin Fat 3 OS=Homo sapiens GN=FAT3 PE=2 SV=2 - [FAT3_HUMAN]	Q8TDW7	N-Term(Dimethyl:2H(4)); T9(Hex)	ETciD	0.370805	1	0	1	1	Medium	2.20116				0	60.1507	2	669.893	1338.78	0.292409	75.1426
IGTSVLQVTAR	Protocadherin Fat 3 OS=Homo sapiens GN=FAT3 PE=2 SV=2 - [FAT3_HUMAN]	Q8TDW7	N-Term(Dimethyl); S4(Hex); T9(Hex)	HCD	0.609747	1	0	1	1	Light		734.182	1.3781e-71	3.81746e-74	0	0.547176	2	748.906	1496.81	0.0937269	68.7934
IGTSVLQVTAR	Protocadherin Fat 3 OS=Homo sapiens GN=FAT3 PE=2 SV=2 - [FAT3_HUMAN]	Q8TDW7	N-Term(Dimethyl); T9(Hex)	HCD	0.513362	1	0	1	1	Light		578.163	3.96927e-56	1.52664e-58	0	23.3834	2	667.88	1334.75	0.355164	73.4653
DVSVIQIQAEDPDSSSNEK	Protocadherin Fat 3 OS=Homo sapiens GN=FAT3 PE=2 SV=2 - [FAT3_HUMAN]	Q8TDW7	N-Term(Dimethyl); S3(Hex); K19(Dimethyl)	HCD	0.410678	1	0	1	1	Light		797.121	1.11185e-77	1.94041e-80	0	2.96018	3	760.364	2279.08	0.375102	82.9039
DVSVIQIQAEDPDSSSNEK	Protocadherin Fat 3 OS=Homo sapiens GN=FAT3 PE=2 SV=2 - [FAT3_HUMAN]	Q8TDW7	N-Term(Dimethyl); S3(Hex); K19(Dimethyl)	HCD	0.4282	1	0	1	1	Light		644.427	2.07099e-62	3.608e-65	0	7.4454	2	1140.04	2279.08	0.782711	82.9917
IGTSVLQVTAR	Protocadherin Fat 3 OS=Homo sapiens GN=FAT3 PE=2 SV=2 - [FAT3_HUMAN]	Q8TDW7	N-Term(Dimethyl); S4(Hex); T9(Hex)	HCD	0.616559	1	0	1	1	Light		649.552	4.12392e-63	1.10858e-65	0	25.9686	2	748.906	1496.8	-0.314043	70.0727
DVSVIQIQAEDPDSSSNEK	Protocadherin Fat 3 OS=Homo sapiens GN=FAT3 PE=2 SV=2 - [FAT3_HUMAN]	Q8TDW7	N-Term(Dimethyl); S3(Hex); K19(Dimethyl)	HCD	0.000230622	1	0	1	1	Light		563.218	2.67905e-54	4.76699e-57	0	11.7161	3	760.364	2279.08	0.616128	84.276
IGTSVLQVTAR	Protocadherin Fat 3 OS=Homo sapiens GN=FAT3 PE=2 SV=2 - [FAT3_HUMAN]	Q8TDW7	N-Term(Dimethyl); T3(Hex); T9(Hex)	HCD	1.00133	1	0	1	1	Light		395.247	1.1114e-37	2.98764e-40	0	62.3308	2	748.906	1496.81	-0.232489	71.6459
IGTSVLQVTAR	Protocadherin Fat 3 OS=Homo sapiens GN=FAT3 PE=2 SV=2 - [FAT3_HUMAN]	Q8TDW7	N-Term(Dimethyl:2H(4)); T9(Hex)	HCD	0.370805	1	0	1	1	Medium		305.976	6.33947e-29	2.52568e-31	0	60.1507	2	669.893	1338.78	0.292409	75.1511
SSDKGSPSQSTSVK	Protocadherin Fat 4 OS=Homo sapiens GN=FAT4 PE=1 SV=2 - [FAT4_HUMAN]	Q6V0I7	N-Term(Dimethyl); K4(Dimethyl); S10(Hex); S12(Hex); K14(Dimethyl)	ETciD	0.498162	1	0	1	1	Light	3.51116				1	44.4775	3	601.63	1802.88	0.248663	23.5531
SSDKGSPSQSTSVK	Protocadherin Fat 4 OS=Homo sapiens GN=FAT4 PE=1 SV=2 - [FAT4_HUMAN]	Q6V0I7	N-Term(Dimethyl); K4(Dimethyl); S10(Hex); S12(Hex); K14(Dimethyl)	ETciD	0.474739	1	0	1	1	Light	2.2375				1	0	3	601.63	1802.88	0.350226	27.0679
GSPSQSTSVK	Protocadherin Fat 4 OS=Homo sapiens GN=FAT4 PE=1 SV=2 - [FAT4_HUMAN]	Q6V0I7	N-Term(Dimethyl); S6(Hex); S8(Hex); K10(Dimethyl)	ETciD	0.884423	1	0	1	1	Light	1.71933				0	27.1242	2	679.333	1357.66	0.111533	24.3927
SSDKGSPSQSTSVK	Protocadherin Fat 4 OS=Homo sapiens GN=FAT4 PE=1 SV=2 - [FAT4_HUMAN]	Q6V0I7	N-Term(Dimethyl); K4(Dimethyl); S10(Hex); S12(Hex); K14(Dimethyl)	ETciD	0.467336	1	0	1	1	Light	3.80927				1	0.845746	3	601.63	1802.88	0.451789	24.4146
QVILDTATDSDIGSNGVDHR	Protocadherin Fat 4 OS=Homo sapiens GN=FAT4 PE=1 SV=2 - [FAT4_HUMAN]	Q6V0I7	N-Term(Dimethyl); T6(Hex); S14(Hex)	ETciD	0.730591	1	0	1	1	Light	2.94946				0	40.3499	3	822.389	2465.15	0.108682	69.34
VTTSDEDIGINAISR	Protocadherin Fat 4 OS=Homo sapiens GN=FAT4 PE=1 SV=2 - [FAT4_HUMAN]	Q6V0I7	N-Term(Dimethyl); T2(Hex)	ETciD	0.720318	1	0	1	1	Light	2.16119				0	4.65685	2	890.945	1780.88	0.408919	80.4614
QVILDTATDSDIGSNGVDHR	Protocadherin Fat 4 OS=Homo sapiens GN=FAT4 PE=1 SV=2 - [FAT4_HUMAN]	Q6V0I7	N-Term(Dimethyl); T6(Hex); S14(Hex)	ETciD	0.582198	1	0	1	1	Light	2.06859				0	37.6396	3	822.389	2465.15	0.0344049	71.6249
QVILDTATDSDIGSNGVDHR	Protocadherin Fat 4 OS=Homo sapiens GN=FAT4 PE=1 SV=2 - [FAT4_HUMAN]	Q6V0I7	N-Term(Dimethyl); T6(Hex)	ETciD	1.19235	1	0	1	1	Light	2.65131				0	34.6648	3	768.371	2303.1	-0.00376327	73.2765
SSDKGSPSQSTSVK	Protocadherin Fat 4 OS=Homo sapiens GN=FAT4 PE=1 SV=2 - [FAT4_HUMAN]	Q6V0I7	N-Term(Dimethyl:2H(4)); K4(Dimethyl:2H(4)); S12(Hex); K14(Dimethyl:2H(4))	ETciD	0.439182	1	0	1	1	Medium	3.62887				1	24.0487	3	551.637	1652.9	-0.156779	24.2014
QVILDTATDSDIGSNGVDHR	Protocadherin Fat 4 OS=Homo sapiens GN=FAT4 PE=1 SV=2 - [FAT4_HUMAN]	Q6V0I7	N-Term(Dimethyl:2H(4)); T6(Hex)	ETciD	0.982236	1	0	1	1	Medium	4.12316				0	42.0307	3	769.713	2307.12	-0.357014	70.8658
SSDKGSPSQSTSVK	Protocadherin Fat 4 OS=Homo sapiens GN=FAT4 PE=1 SV=2 - [FAT4_HUMAN]	Q6V0I7	N-Term(Dimethyl); K4(Dimethyl); S8(Hex); S12(Hex); K14(Dimethyl)	HCD	0.498162	1	0	1	1	Light		244.753	1.64699e-22	3.34753e-25	1	44.4775	3	601.63	1802.88	0.248663	23.5645
GSPSQSTSVK	Protocadherin Fat 4 OS=Homo sapiens GN=FAT4 PE=1 SV=2 - [FAT4_HUMAN]	Q6V0I7	N-Term(Dimethyl); S6(Hex); T7(Hex); K10(Dimethyl)	HCD	0.884423	1	0	1	1	Light		468.63	3.96197e-45	1.37092e-47	0	27.1242	2	679.333	1357.66	0.111533	24.4028
SSDKGSPSQSTSVK	Protocadherin Fat 4 OS=Homo sapiens GN=FAT4 PE=1 SV=2 - [FAT4_HUMAN]	Q6V0I7	N-Term(Dimethyl); K4(Dimethyl); S10(Hex); T11(Hex); K14(Dimethyl)	HCD	0.467336	1	0	1	1	Light		433.082	2.46412e-41	4.91841e-44	1	0.845746	3	601.63	1802.88	0.451789	24.4252
GVPSLTGR	Protocadherin Fat 4 OS=Homo sapiens GN=FAT4 PE=1 SV=2 - [FAT4_HUMAN]	Q6V0I7	N-Term(Dimethyl); T6(Hex)	HCD	0.74853	1	0	1	1	Light		264.594	9.99936e-25	3.472e-27	0	30.5867	2	488.769	976.531	0.122058	56.8691
QVILDTATDSDIGSNGVDHR	Protocadherin Fat 4 OS=Homo sapiens GN=FAT4 PE=1 SV=2 - [FAT4_HUMAN]	Q6V0I7	N-Term(Dimethyl); T6(Hex); S14(Hex)	HCD	0.730591	0.7478	0	1	1	Light		1059.07	6.80766e-104	1.24001e-106	0	40.3499	3	822.389	2465.15	0.108682	69.3527
QVILDTATDSDIGSNGVDHR	Protocadherin Fat 4 OS=Homo sapiens GN=FAT4 PE=1 SV=2 - [FAT4_HUMAN]	Q6V0I7	N-Term(Dimethyl); T6(Hex)	HCD	0.982236	0.7238	0	1	1	Light		924.208	2.11753e-90	3.79485e-93	0	39.978	3	768.372	2303.1	0.155245	70.9911
VTTSDEDIGINAISR	Protocadherin Fat 4 OS=Homo sapiens GN=FAT4 PE=1 SV=2 - [FAT4_HUMAN]	Q6V0I7	N-Term(Dimethyl); T2(Hex)	HCD	0.720318	1	0	1	1	Light		734.282	1.70496e-71	3.73077e-74	0	4.65685	2	890.945	1780.88	0.408919	80.4738
QVILDTATDSDIGSNGVDHR	Protocadherin Fat 4 OS=Homo sapiens GN=FAT4 PE=1 SV=2 - [FAT4_HUMAN]	Q6V0I7	N-Term(Dimethyl); T6(Hex); S14(Hex)	HCD	0.582198	0.7244	0	1	1	Light		964.084	2.14778e-94	3.90505e-97	0	37.6396	3	822.389	2465.15	0.0344049	71.6353
QVILDTATDSDIGSNGVDHR	Protocadherin Fat 4 OS=Homo sapiens GN=FAT4 PE=1 SV=2 - [FAT4_HUMAN]	Q6V0I7	N-Term(Dimethyl); T6(Hex)	HCD	1.19235	1	0	1	1	Light		909.253	6.75846e-89	1.18778e-91	0	34.6648	3	768.371	2303.1	-0.00376327	73.2845
FSQIFSAHVPENSPLGYTVTR	Protocadherin Fat 4 OS=Homo sapiens GN=FAT4 PE=1 SV=2 - [FAT4_HUMAN]	Q6V0I7	N-Term(Dimethyl); T18(Hex)	HCD	0.521989	1	0	1	1	Light		531.004	4.36432e-51	7.93513e-54	0	43.9393	3	847.427	2540.27	-0.074632	107.743
VTTSDEDIGINAISR	Protocadherin Fat 4 OS=Homo sapiens GN=FAT4 PE=1 SV=2 - [FAT4_HUMAN]	Q6V0I7	N-Term(Dimethyl:2H(4)); T3(Hex)	HCD	0.769783	1	0	1	1	Medium		485.616	1.1223e-46	2.74401e-49	0	66.8606	3	595.64	1784.91	-0.124538	80.455
GASIFSVTALDPDSK	Protocadherin gamma-A11 OS=Homo sapiens GN=PCDHGA11 PE=1 SV=1 - [PCDGB_HUMAN]	Q9Y5H2	N-Term(Dimethyl); S3(Hex); S6(Hex); K15(Dimethyl)	ETciD	0.604301	1	0	1	1	Light	1.78957				0	36.7287	2	944.47	1887.93	0.251856	101.839
GASIFSVTALDPDSK	Protocadherin gamma-A11 OS=Homo sapiens GN=PCDHGA11 PE=1 SV=1 - [PCDGB_HUMAN]	Q9Y5H2	N-Term(Dimethyl); S6(Hex); T8(Hex); K15(Dimethyl)	HCD	0.604301	1	0	1	1	Light		437.111	1.07755e-41	1.94504e-44	0	36.7287	2	944.47	1887.93	0.251856	101.85
GASIFSVTALDPDSK	Protocadherin gamma-A11 OS=Homo sapiens GN=PCDHGA11 PE=1 SV=1 - [PCDGB_HUMAN]	Q9Y5H2	N-Term(Dimethyl:2H(4)); S6(Hex); T8(Hex); K15(Dimethyl:2H(4))	HCD	0.539226	1	0	1	1	Medium		481.33	3.43075e-46	7.36213e-49	0	37.3601	2	948.496	1895.98	0.743122	103.902
LVLTALDGGHPPLSGTTELR	Protocadherin gamma-B5 OS=Homo sapiens GN=PCDHGB5 PE=2 SV=1 - [PCDGH_HUMAN]	Q9Y5G0	N-Term(Dimethyl); T16(Hex); T17(Hex)	ETciD	0.563236	1	0	1	1	Light	2.67099				0	31.0418	3	800.423	2399.26	0.230568	97.1073
LVLTALDGGHPPLSGTTELR	Protocadherin gamma-B5 OS=Homo sapiens GN=PCDHGB5 PE=2 SV=1 - [PCDGH_HUMAN]	Q9Y5G0	N-Term(Dimethyl); S14(Hex); T16(Hex)	HCD	0.563236	1	0	1	1	Light		962.178	2.37428e-94	6.05685e-97	0	31.0418	3	800.423	2399.26	0.230568	97.1189
LVLTALDGGHPPLSGTTELR	Protocadherin gamma-B5 OS=Homo sapiens GN=PCDHGB5 PE=2 SV=1 - [PCDGH_HUMAN]	Q9Y5G0	N-Term(Dimethyl); S14(Hex); T16(Hex)	HCD	0.466633	1	0	1	1	Light		767.538	6.66341e-75	1.76281e-77	0	24.9489	3	800.423	2399.25	-0.15102	104.511
DAGTPSLSALTIVR	Protocadherin gamma-C3 OS=Homo sapiens GN=PCDHGC3 PE=1 SV=1 - [PCDGK_HUMAN]	Q9UN70	N-Term(Dimethyl); S8(Hex)	ETciD	0.278155	1	0	1	1	Light	1.61775				0	45.7916	2	795.933	1590.86	-0.45863	104.797
DAGTPSLSALTIVR	Protocadherin gamma-C3 OS=Homo sapiens GN=PCDHGC3 PE=1 SV=1 - [PCDGK_HUMAN]	Q9UN70	N-Term(Dimethyl); T11(Hex)	HCD	0.278155	1	0	1	1	Light		415.077	9.31948e-40	3.10649e-42	0	45.7916	2	795.933	1590.86	-0.45863	104.808
FERPSYEAELSENSPIGHSVIQVK	Protocadherin-1 OS=Homo sapiens GN=PCDH1 PE=1 SV=2 - [PCDH1_HUMAN]	Q08174	N-Term(Dimethyl:2H(4)); S19(Hex); K24(Dimethyl:2H(4))	ETciD	1.19826	1	0	1	1	Medium	6.95982				0	7.82525	4	736.387	2942.52	0.466157	94.7147
FERPSYEAELSENSPIGHSVIQVK	Protocadherin-1 OS=Homo sapiens GN=PCDH1 PE=1 SV=2 - [PCDH1_HUMAN]	Q08174	N-Term(Dimethyl:2H(4)); S19(Hex); K24(Dimethyl:2H(4))	ETciD	1.20815	1	0	1	1	Medium	7.21317				0	10.7047	4	736.387	2942.52	0.300218	95.0887
FERPSYEAELSENSPIGHSVIQVK	Protocadherin-1 OS=Homo sapiens GN=PCDH1 PE=1 SV=2 - [PCDH1_HUMAN]	Q08174	N-Term(Dimethyl:2H(4)); S19(Hex); K24(Dimethyl:2H(4))	ETciD	1.05452	1	0	1	1	Medium	7.06198				0	7.05287	4	736.386	2942.52	0.217248	95.4756
FERPSYEAELSENSPIGHSVIQVK	Protocadherin-1 OS=Homo sapiens GN=PCDH1 PE=1 SV=2 - [PCDH1_HUMAN]	Q08174	N-Term(Dimethyl:2H(4)); S19(Hex); K24(Dimethyl:2H(4))	ETciD	1.28035	1	0	1	1	Medium	5.26026				0	28.6009	4	736.386	2942.52	0.217248	95.9476
GSPSLQGTATVLVNVLDCNDNDPK	Protocadherin-1 OS=Homo sapiens GN=PCDH1 PE=1 SV=2 - [PCDH1_HUMAN]	Q08174	N-Term(Dimethyl:2H(4)); T8(Hex); T10(Hex); C18(Carbamidomethyl); K24(Dimethyl:2H(4))	ETciD	1.98939	1	0	1	1	Medium	2.85104				0	16.0157	3	968.15	2902.44	0.867024	107.937
FERPSYEAELSENSPIGHSVIQVK	Protocadherin-1 OS=Homo sapiens GN=PCDH1 PE=1 SV=2 - [PCDH1_HUMAN]	Q08174	N-Term(Dimethyl); S19(Hex); K24(Dimethyl)	HCD	1.05452	1	0	1	1	Light		667.601	9.58993e-65	1.73731e-67	0	14.441	4	734.374	2934.47	0.190933	95.4269
FERPSYEAELSENSPIGHSVIQVK	Protocadherin-1 OS=Homo sapiens GN=PCDH1 PE=1 SV=2 - [PCDH1_HUMAN]	Q08174	N-Term(Dimethyl:2H(4)); S19(Hex); K24(Dimethyl:2H(4))	HCD	1.55073	1	0	1	1	Medium		672.277	3.30935e-65	5.92012e-68	0	15.9273	4	736.386	2942.52	0.217248	94.3025
FERPSYEAELSENSPIGHSVIQVK	Protocadherin-1 OS=Homo sapiens GN=PCDH1 PE=1 SV=2 - [PCDH1_HUMAN]	Q08174	N-Term(Dimethyl:2H(4)); S19(Hex); K24(Dimethyl:2H(4))	HCD	1.19826	1	0	1	1	Medium		562.018	3.53146e-54	6.28373e-57	0	7.82525	4	736.387	2942.52	0.466157	94.7248
FERPSYEAELSENSPIGHSVIQVK	Protocadherin-1 OS=Homo sapiens GN=PCDH1 PE=1 SV=2 - [PCDH1_HUMAN]	Q08174	N-Term(Dimethyl:2H(4)); S19(Hex); K24(Dimethyl:2H(4))	HCD	1.20815	1	0	1	1	Medium		633.684	2.4017e-61	4.28111e-64	0	10.7047	4	736.387	2942.52	0.300218	95.0989
FERPSYEAELSENSPIGHSVIQVK	Protocadherin-1 OS=Homo sapiens GN=PCDH1 PE=1 SV=2 - [PCDH1_HUMAN]	Q08174	N-Term(Dimethyl:2H(4)); S19(Hex); K24(Dimethyl:2H(4))	HCD	1.81289	1	0	1	1	Medium		234.57	1.9515e-21	3.49105e-24	0	20.3919	3	981.513	2942.52	0.221818	95.1386
FERPSYEAELSENSPIGHSVIQVK	Protocadherin-1 OS=Homo sapiens GN=PCDH1 PE=1 SV=2 - [PCDH1_HUMAN]	Q08174	N-Term(Dimethyl:2H(4)); S19(Hex); K24(Dimethyl:2H(4))	HCD	1.28035	1	0	1	1	Medium		402.965	2.82456e-38	5.05287e-41	0	28.6009	4	736.386	2942.52	0.217248	95.96
GSPSLQGTATVLVNVLDCNDNDPK	Protocadherin-1 OS=Homo sapiens GN=PCDH1 PE=1 SV=2 - [PCDH1_HUMAN]	Q08174	N-Term(Dimethyl:2H(4)); T8(Hex); T10(Hex); C18(Carbamidomethyl); K24(Dimethyl:2H(4))	HCD	1.98939	1	0	1	1	Medium		596.743	1.50951e-57	2.11712e-60	0	16.0157	3	968.15	2902.44	0.867024	107.948
AELGQQTGTATVR	Protocadherin-16 OS=Homo sapiens GN=DCHS1 PE=2 SV=1 - [PCD16_HUMAN]	Q96JQ0	N-Term(Dimethyl); T7(Hex); T9(Hex); T11(Hex)	HCD	0.590752	1	0	1	1	Light		547.326	8.20023e-53	1.85107e-55	0	44.1214	2	923.444	1845.88	-0.689584	42.3229
AELGQQTGTATVR	Protocadherin-16 OS=Homo sapiens GN=DCHS1 PE=2 SV=1 - [PCD16_HUMAN]	Q96JQ0	N-Term(Dimethyl); T7(Hex); T9(Hex); T11(Hex)	HCD	0.444862	1	0	1	1	Light		501.105	3.56652e-48	7.7533e-51	0	36.6873	2	923.444	1845.88	0.236253	42.7242
ENNPPGTSLLTLR	Protocadherin-16 OS=Homo sapiens GN=DCHS1 PE=2 SV=1 - [PCD16_HUMAN]	Q96JQ0	N-Term(Dimethyl:2H(4)); T7(Hex)	HCD	0.928769	1	0	1	1	Medium		312.412	2.32998e-29	5.73885e-32	0	24.8588	2	803.435	1605.86	-0.338636	87.4994
SATVQINVK	Protocadherin-17 OS=Homo sapiens GN=PCDH17 PE=2 SV=2 - [PCD17_HUMAN]	O14917	N-Term(Dimethyl); S1(Hex); K9(Dimethyl)	ETciD	0.681231	1	0	1	1	Light	2.27898				0	29.3155	2	589.338	1177.67	0.347278	52.5491
SATVQINVK	Protocadherin-17 OS=Homo sapiens GN=PCDH17 PE=2 SV=2 - [PCD17_HUMAN]	O14917	N-Term(Dimethyl); S1(Hex); K9(Dimethyl)	ETciD	0.502591	1	0	1	1	Light	2.28633				0	70.1978	2	589.338	1177.67	0.554587	53.3633
SATVQINVK	Protocadherin-17 OS=Homo sapiens GN=PCDH17 PE=2 SV=2 - [PCD17_HUMAN]	O14917	N-Term(Dimethyl:2H(4)); S1(Hex); T3(Hex); K9(Dimethyl:2H(4))	ETciD	0.727546	1	0	1	1	Medium	2.19409				0	19.9241	2	674.389	1347.77	0.114397	52.3973
SATVQINVK	Protocadherin-17 OS=Homo sapiens GN=PCDH17 PE=2 SV=2 - [PCD17_HUMAN]	O14917	N-Term(Dimethyl:2H(4)); S1(Hex); T3(Hex); K9(Dimethyl:2H(4))	ETciD	0.683919	1	0	1	1	Medium	2.05208				0	26.9495	2	674.389	1347.77	0.114397	53.2033
SATVQINVK	Protocadherin-17 OS=Homo sapiens GN=PCDH17 PE=2 SV=2 - [PCD17_HUMAN]	O14917	N-Term(Dimethyl:2H(4)); S1(Hex); T3(Hex); K9(Dimethyl:2H(4))	ETciD	0.652596	1	0	1	1	Medium	1.80195				0	11.4903	2	674.389	1347.77	0.114397	53.2366
SATVQINVK	Protocadherin-17 OS=Homo sapiens GN=PCDH17 PE=2 SV=2 - [PCD17_HUMAN]	O14917	N-Term(Dimethyl); T3(Hex); K9(Dimethyl)	HCD	0.681231	1	0	1	1	Light		408.566	4.75782e-39	1.39117e-41	0	29.3155	2	589.338	1177.67	0.347278	52.5596
SATVQINVK	Protocadherin-17 OS=Homo sapiens GN=PCDH17 PE=2 SV=2 - [PCD17_HUMAN]	O14917	N-Term(Dimethyl); T3(Hex); K9(Dimethyl)	HCD	0.502591	1	0	1	1	Light		389.809	3.53237e-37	1.04508e-39	0	70.1978	2	589.338	1177.67	0.554587	53.3713
SATVQINVK	Protocadherin-17 OS=Homo sapiens GN=PCDH17 PE=2 SV=2 - [PCD17_HUMAN]	O14917	N-Term(Dimethyl:2H(4)); S1(Hex); T3(Hex); K9(Dimethyl:2H(4))	HCD	0.727546	1	0	1	1	Medium		407.406	4.52503e-39	1.81728e-41	0	19.9241	2	674.389	1347.77	0.114397	52.4057
SATVQINVK	Protocadherin-17 OS=Homo sapiens GN=PCDH17 PE=2 SV=2 - [PCD17_HUMAN]	O14917	N-Term(Dimethyl:2H(4)); S1(Hex); T3(Hex); K9(Dimethyl:2H(4))	HCD	0.683919	1	0	1	1	Medium		370.57	2.25413e-35	8.77094e-38	0	9.46054	2	674.389	1347.77	-0.157319	53.5516
SATVQINVK	Protocadherin-17 OS=Homo sapiens GN=PCDH17 PE=2 SV=2 - [PCD17_HUMAN]	O14917	N-Term(Dimethyl:2H(4)); S1(Hex); T3(Hex); K9(Dimethyl:2H(4))	HCD	0.652596	1	0	1	1	Medium		338.374	3.62081e-32	1.45414e-34	0	11.4903	2	674.389	1347.77	0.114397	53.2441
SGSSILK	Protocadherin-18 OS=Homo sapiens GN=PCDH18 PE=2 SV=3 - [PCD18_HUMAN]	Q9HCL0	N-Term(Dimethyl:2H(4)); S1(Hex); S3(Hex); K7(Dimethyl:2H(4))	ETciD	0.580715	1	0	1	1	Medium	1.72535				0	71.0819	2	540.312	1079.62	0.129424	34.208
ENLQPNSPVGMVTVMDADKGR	Protocadherin-7 OS=Homo sapiens GN=PCDH7 PE=1 SV=2 - [PCDH7_HUMAN]	O60245	N-Term(Dimethyl); M11(Oxidation); T13(Hex); M15(Oxidation); K19(Dimethyl)	ETciD	0.696519	1	0	1	1	Light	5.30243				1	3.56825	3	836.737	2508.2	0.0520967	68.4021
ENLQPNSPVGMVTVMDADKGR	Protocadherin-7 OS=Homo sapiens GN=PCDH7 PE=1 SV=2 - [PCDH7_HUMAN]	O60245	N-Term(Dimethyl); T13(Hex); M15(Oxidation); K19(Dimethyl)	ETciD	0.184787	1	0	1	1	Light	6.65999				1	0	3	831.405	2492.2	0.167227	77.2103
ENLQPNSPVGMVTVMDADKGR	Protocadherin-7 OS=Homo sapiens GN=PCDH7 PE=1 SV=2 - [PCDH7_HUMAN]	O60245	N-Term(Dimethyl); M11(Oxidation); T13(Hex); K19(Dimethyl)	ETciD	0.465527	1	0	1	1	Light	5.57827				1	0.930907	3	831.406	2492.2	0.608055	77.9513
ENLQPNSPVGMVTVMDADKGR	Protocadherin-7 OS=Homo sapiens GN=PCDH7 PE=1 SV=2 - [PCDH7_HUMAN]	O60245	N-Term(Dimethyl); M11(Oxidation); T13(Hex); K19(Dimethyl)	ETciD	0.375999	1	0	1	1	Light	5.43302				1	0.335659	3	831.406	2492.2	0.608055	78.322
ENLQPNSPVGMVTVMDADKGR	Protocadherin-7 OS=Homo sapiens GN=PCDH7 PE=1 SV=2 - [PCDH7_HUMAN]	O60245	N-Term(Dimethyl); T13(Hex); K19(Dimethyl)	ETciD	0.447842	1	0	1	1	Light	5.71141				1	0.2727	3	826.075	2476.21	1.31909	91.3797
ENLQPNSPVGMVTVMDADKGR	Protocadherin-7 OS=Homo sapiens GN=PCDH7 PE=1 SV=2 - [PCDH7_HUMAN]	O60245	N-Term(Dimethyl); T13(Hex); K19(Dimethyl)	ETciD	0.332049	1	0	1	1	Light	5.5839				1	0	3	826.074	2476.21	1.17119	92.1487
ENLQPNSPVGMVTVMDADKGR	Protocadherin-7 OS=Homo sapiens GN=PCDH7 PE=1 SV=2 - [PCDH7_HUMAN]	O60245	N-Term(Dimethyl); T13(Hex); M15(Oxidation); K19(Dimethyl)	ETciD	0.402327	1	0	1	1	Light	5.8882				1	7.72777	3	831.405	2492.2	0.0202839	80.272
ENLQPNSPVGMVTVMDADKGR	Protocadherin-7 OS=Homo sapiens GN=PCDH7 PE=1 SV=2 - [PCDH7_HUMAN]	O60245	N-Term(Dimethyl); M11(Oxidation); T13(Hex); K19(Dimethyl)	ETciD	0.604853	1	0	1	1	Light	4.92331				1	0	3	831.405	2492.2	-0.20013	80.9599
ENLQPNSPVGMVTVMDADK	Protocadherin-7 OS=Homo sapiens GN=PCDH7 PE=1 SV=2 - [PCDH7_HUMAN]	O60245	N-Term(Dimethyl); T13(Hex); K19(Dimethyl)	ETciD	0.399254	1	0	1	1	Light	3.33487				0	19.6651	3	755.033	2263.08	0.108693	102.244
LLPTATDRDFGR	Protocadherin-7 OS=Homo sapiens GN=PCDH7 PE=1 SV=2 - [PCDH7_HUMAN]	O60245	N-Term(Dimethyl); T4(Hex)	ETciD	0.139509	1	0	1	1	Light	2.90245				1	52.3224	3	517.939	1551.8	-0.0919264	69.5979
SSQAILR	Protocadherin-7 OS=Homo sapiens GN=PCDH7 PE=1 SV=2 - [PCDH7_HUMAN]	O60245	N-Term(Dimethyl:2H(4)); S1(Hex)	ETciD	0.507354	1	0	1	1	Medium	1.50173				0	21.4524	2	484.782	968.556	-0.0148962	37.1411
ENLQPNSPVGMVTVMDADK	Protocadherin-7 OS=Homo sapiens GN=PCDH7 PE=1 SV=2 - [PCDH7_HUMAN]	O60245	N-Term(Dimethyl:2H(4)); M11(Oxidation); T13(Hex); K19(Dimethyl:2H(4))	ETciD	0.70682	1	0	1	1	Medium	4.0807				0	35.6455	3	763.048	2287.13	0.150421	84.9913
ENLQPNSPVGMVTVMDADK	Protocadherin-7 OS=Homo sapiens GN=PCDH7 PE=1 SV=2 - [PCDH7_HUMAN]	O60245	N-Term(Dimethyl:2H(4)); T13(Hex); K19(Dimethyl:2H(4))	ETciD	0.983528	1	0	1	1	Medium	5.99911				0	4.20471	3	757.716	2271.13	0.438696	99.7115
ENLQPNSPVGMVTVMDADKGR	Protocadherin-7 OS=Homo sapiens GN=PCDH7 PE=1 SV=2 - [PCDH7_HUMAN]	O60245	N-Term(Dimethyl:2H(4)); M11(Oxidation); T13(Hex); K19(Dimethyl:2H(4))	ETciD	0.555833	1	0	1	1	Medium	2.67525				1	32.1123	3	834.088	2500.25	-0.192313	80.8938
ENLQPNSPVGMVTVMDADKGR	Protocadherin-7 OS=Homo sapiens GN=PCDH7 PE=1 SV=2 - [PCDH7_HUMAN]	O60245	N-Term(Dimethyl:2H(4)); T13(Hex); K19(Dimethyl:2H(4))	ETciD	0.359517	1	0	1	1	Medium	3.81317				1	9.83525	3	828.757	2484.26	-0.0046823	94.1875
SSQAILR	Protocadherin-7 OS=Homo sapiens GN=PCDH7 PE=1 SV=2 - [PCDH7_HUMAN]	O60245	N-Term(Dimethyl); S2(Hex)	HCD	0.507354	1	0	1	1	Light		312.456	2.96543e-29	5.68091e-32	0	0	2	482.769	964.531	0.133944	36.7965
SSQAILR	Protocadherin-7 OS=Homo sapiens GN=PCDH7 PE=1 SV=2 - [PCDH7_HUMAN]	O60245	N-Term(Dimethyl); S2(Hex)	HCD	0.463829	1	0	1	1	Light		295.307	1.53816e-27	2.94667e-30	0	1.0502	2	482.769	964.531	0.133944	41.943
SSQAILR	Protocadherin-7 OS=Homo sapiens GN=PCDH7 PE=1 SV=2 - [PCDH7_HUMAN]	O60245	N-Term(Dimethyl); S2(Hex)	HCD	0.361645	1	0	1	1	Light		298.634	6.94456e-28	1.36974e-30	0	9.3014	2	482.769	964.531	0.0073849	38.3077
ENLQPNSPVGMVTVMDADKGR	Protocadherin-7 OS=Homo sapiens GN=PCDH7 PE=1 SV=2 - [PCDH7_HUMAN]	O60245	N-Term(Dimethyl); S7(Hex); M11(Oxidation); M15(Oxidation); K19(Dimethyl)	HCD	0.696519	1	0	1	1	Light		466.229	1.48943e-44	2.38309e-47	1	7.39602	3	836.737	2508.2	0.198102	68.02
ENLQPNSPVGMVTVMDADKGR	Protocadherin-7 OS=Homo sapiens GN=PCDH7 PE=1 SV=2 - [PCDH7_HUMAN]	O60245	N-Term(Dimethyl); T13(Hex); M15(Oxidation); K19(Dimethyl)	HCD	0.184787	1	0	1	1	Light		871.446	4.45169e-85	7.16859e-88	1	0	3	831.405	2492.2	0.167227	77.2262
ENLQPNSPVGMVTVMDADKGR	Protocadherin-7 OS=Homo sapiens GN=PCDH7 PE=1 SV=2 - [PCDH7_HUMAN]	O60245	N-Term(Dimethyl); M11(Oxidation); T13(Hex); K19(Dimethyl)	HCD	0.375999	1	0	1	1	Light		952.743	3.28059e-93	5.317e-96	1	0.335659	3	831.406	2492.2	0.608055	78.3334
ENLQPNSPVGMVTVMDADKGR	Protocadherin-7 OS=Homo sapiens GN=PCDH7 PE=1 SV=2 - [PCDH7_HUMAN]	O60245	N-Term(Dimethyl); T13(Hex); K19(Dimethyl)	HCD	0.447842	1	0	1	1	Light		1056.6	1.37889e-103	2.18871e-106	1	6.82017	3	826.074	2476.21	0.209898	91.0191
ENLQPNSPVGMVTVMDADK	Protocadherin-7 OS=Homo sapiens GN=PCDH7 PE=1 SV=2 - [PCDH7_HUMAN]	O60245	N-Term(Dimethyl); T13(Hex); K19(Dimethyl)	HCD	0.983528	1	0	1	1	Light		679.977	5.63033e-66	1.00542e-68	0	1.39049	3	755.033	2263.08	0.594151	99.7176
ENLQPNSPVGMVTVMDADK	Protocadherin-7 OS=Homo sapiens GN=PCDH7 PE=1 SV=2 - [PCDH7_HUMAN]	O60245	N-Term(Dimethyl); S7(Hex); K19(Dimethyl)	HCD	0.622683	1	0	1	1	Light		197.438	9.77708e-18	1.80389e-20	0	34.7726	3	755.033	2263.08	0.351422	100.119
SATATVSLFVMDENDNAPTVTLPK	Protocadherin-7 OS=Homo sapiens GN=PCDH7 PE=1 SV=2 - [PCDH7_HUMAN]	O60245	N-Term(Dimethyl); T3(Hex); T5(Hex); T19(Hex); T21(Hex); K24(Dimethyl)	HCD	0.78135	1	0	1	1	Light		501.767	4.4869e-48	6.65712e-51	0	17.0823	3	1075.85	3225.53	0.749804	108.063
ENLQPNSPVGMVTVMDADKGR	Protocadherin-7 OS=Homo sapiens GN=PCDH7 PE=1 SV=2 - [PCDH7_HUMAN]	O60245	N-Term(Dimethyl); T13(Hex); M15(Oxidation); K19(Dimethyl)	HCD	0.402327	1	0	1	1	Light		679.468	6.9511e-66	1.13026e-68	1	7.72777	3	831.405	2492.2	0.0202839	80.2804
ENLQPNSPVGMVTVMDADKGR	Protocadherin-7 OS=Homo sapiens GN=PCDH7 PE=1 SV=2 - [PCDH7_HUMAN]	O60245	N-Term(Dimethyl); M11(Oxidation); T13(Hex); K19(Dimethyl)	HCD	0.604853	1	0	1	1	Light		742.343	3.50448e-72	5.83108e-75	1	0	3	831.405	2492.2	-0.20013	80.9723
ENLQPNSPVGMVTVMDADK	Protocadherin-7 OS=Homo sapiens GN=PCDH7 PE=1 SV=2 - [PCDH7_HUMAN]	O60245	N-Term(Dimethyl); M11(Oxidation); T13(Hex); K19(Dimethyl)	HCD	0.569	1	0	1	1	Light		464.614	2.05288e-44	3.45602e-47	0	0	2	1140.04	2279.08	0.818499	87.0763
ENLQPNSPVGMVTVMDADK	Protocadherin-7 OS=Homo sapiens GN=PCDH7 PE=1 SV=2 - [PCDH7_HUMAN]	O60245	N-Term(Dimethyl); S7(Hex); K19(Dimethyl)	HCD	0.399254	1	0	1	1	Light		509.92	5.42947e-49	1.01866e-51	0	19.6651	3	755.033	2263.08	0.108693	102.251
SATATVSLFVMDENDNAPTVTLPK	Protocadherin-7 OS=Homo sapiens GN=PCDH7 PE=1 SV=2 - [PCDH7_HUMAN]	O60245	N-Term(Dimethyl); T3(Hex); T5(Hex); T19(Hex); T21(Hex); K24(Dimethyl)	HCD	0.779861	1	0	1	1	Light		691.505	4.6666e-67	7.07061e-70	0	2.45896	3	1075.85	3225.52	0.522734	108.18
SPVGMVTVMDADK	Protocadherin-7 OS=Homo sapiens GN=PCDH7 PE=1 SV=2 - [PCDH7_HUMAN]	O60245	N-Term(Dimethyl); T7(Hex); K13(Dimethyl)	HCD	1.44615	1	0	1	1	Light		532.978	2.93853e-50	5.03691e-54	0	0	2	784.383	1567.76	-0.323116	82.9988
ENLQPNSPVGMVTVMDADKGR	Protocadherin-7 OS=Homo sapiens GN=PCDH7 PE=1 SV=2 - [PCDH7_HUMAN]	O60245	N-Term(Dimethyl:2H(4)); M11(Oxidation); T13(Hex); K19(Dimethyl:2H(4))	HCD	0.465527	1	0	1	1	Medium		893.35	2.63999e-87	4.62345e-90	1	7.80457	3	834.089	2500.25	0.61327	77.9232
ENLQPNSPVGMVTVMDADKGR	Protocadherin-7 OS=Homo sapiens GN=PCDH7 PE=1 SV=2 - [PCDH7_HUMAN]	O60245	N-Term(Dimethyl:2H(4)); S7(Hex); M11(Oxidation); K19(Dimethyl:2H(4))	HCD	0.555833	1	0	1	1	Medium		463.357	2.64038e-44	4.61606e-47	1	32.1123	3	834.088	2500.25	-0.192313	80.9013
ENLQPNSPVGMVTVMDADK	Protocadherin-7 OS=Homo sapiens GN=PCDH7 PE=1 SV=2 - [PCDH7_HUMAN]	O60245	N-Term(Dimethyl:2H(4)); S7(Hex); M15(Oxidation); K19(Dimethyl:2H(4))	HCD	0.826114	1	0	1	1	Medium		331.775	3.72764e-31	6.64464e-34	0	34.3009	3	763.047	2287.13	-0.650171	86.1626
ENLQPNSPVGMVTVMDADKGR	Protocadherin-7 OS=Homo sapiens GN=PCDH7 PE=1 SV=2 - [PCDH7_HUMAN]	O60245	N-Term(Dimethyl:2H(4)); T13(Hex); K19(Dimethyl:2H(4))	HCD	0.359517	1	0	1	1	Medium		677.725	9.87693e-66	1.68836e-68	1	9.83525	3	828.757	2484.26	-0.0046823	94.1951
ENLQPNSPVGMVTVMDADK	Protocadherin-7 OS=Homo sapiens GN=PCDH7 PE=1 SV=2 - [PCDH7_HUMAN]	O60245	N-Term(Dimethyl:2H(4)); T13(Hex); K19(Dimethyl:2H(4))	HCD	1.85495	1	0	1	1	Medium		240.047	5.59844e-22	9.89123e-25	0	56.0051	3	757.716	2271.13	-0.125665	101.617
ENLQPNSPVGMVTVMDADK	Protocadherin-7 OS=Homo sapiens GN=PCDH7 PE=1 SV=2 - [PCDH7_HUMAN]	O60245	N-Term(Dimethyl:2H(4)); T13(Hex); K19(Dimethyl:2H(4))	HCD	1.98731	1	0	1	1	Medium		351.514	4.03648e-33	7.05678e-36	0	20.274	2	1136.07	2271.13	0.552113	101.915
SATAALSVR	Protocadherin-8 OS=Homo sapiens GN=PCDH8 PE=2 SV=2 - [PCDH8_HUMAN]	O95206	N-Term(Dimethyl); S1(Hex); T3(Hex)	HCD	0.458992	1	0	1	1	Light		248.555	5.8019e-23	1.39469e-25	0	46.8032	2	614.32	1227.63	0.31299	43.791
YSTVGVITVTDADAGENK	Protocadherin-9 OS=Homo sapiens GN=PCDH9 PE=1 SV=2 - [PCDH9_HUMAN]	Q9HC56	N-Term(Dimethyl); T3(Hex); K18(Dimethyl)	ETciD	0.611392	1	0	1	1	Light	2.37915				0	11.2433	2	1029.51	2058.01	0.204932	78.031
YSTVGVITVTDADAGENK	Protocadherin-9 OS=Homo sapiens GN=PCDH9 PE=1 SV=2 - [PCDH9_HUMAN]	Q9HC56	N-Term(Dimethyl); T10(Hex); K18(Dimethyl)	ETciD	0.491493	1	0	1	1	Light	4.65955				0	6.74564	3	686.676	2058.01	0.465314	79.5096
YSTVGVITVTDADAGENK	Protocadherin-9 OS=Homo sapiens GN=PCDH9 PE=1 SV=2 - [PCDH9_HUMAN]	Q9HC56	N-Term(Dimethyl); T3(Hex); T8(Hex); K18(Dimethyl)	ETciD	0.626635	1	0	1	1	Light	3.55627				0	0.631657	2	1110.54	2220.07	0.149602	75.7934
YSTVGVITVTDADAGENK	Protocadherin-9 OS=Homo sapiens GN=PCDH9 PE=1 SV=2 - [PCDH9_HUMAN]	Q9HC56	N-Term(Dimethyl); T3(Hex); K18(Dimethyl)	ETciD	0.427876	1	0	1	1	Light	4.53933				0	45.8085	3	686.676	2058.01	-0.15749	75.8419
YSTVGVITVTDADAGENK	Protocadherin-9 OS=Homo sapiens GN=PCDH9 PE=1 SV=2 - [PCDH9_HUMAN]	Q9HC56	N-Term(Dimethyl); T3(Hex); T8(Hex); K18(Dimethyl)	ETciD	0.579012	1	0	1	1	Light	4.98493				0	9.1596	3	740.693	2220.07	0.143546	75.886
YSTVGVITVTDADAGENK	Protocadherin-9 OS=Homo sapiens GN=PCDH9 PE=1 SV=2 - [PCDH9_HUMAN]	Q9HC56	N-Term(Dimethyl); T3(Hex); K18(Dimethyl)	ETciD	0.554211	1	0	1	1	Light	3.52143				0	47.4995	3	686.676	2058.01	-0.246462	79.8909
YSTVGVITVTDADAGENK	Protocadherin-9 OS=Homo sapiens GN=PCDH9 PE=1 SV=2 - [PCDH9_HUMAN]	Q9HC56	N-Term(Dimethyl); T3(Hex); K18(Dimethyl)	ETciD	0.569718	1	0	1	1	Light	1.73349				0	4.3222	2	1029.51	2058.01	0.204932	80.0142
YSTVGVITVTDADAGENK	Protocadherin-9 OS=Homo sapiens GN=PCDH9 PE=1 SV=2 - [PCDH9_HUMAN]	Q9HC56	N-Term(Dimethyl); T8(Hex); K18(Dimethyl)	ETciD	0.54208	1	0	1	1	Light	3.69471				0	0	2	1029.51	2058.01	0.323561	81.5178
YSTVGVITVTDADAGENK	Protocadherin-9 OS=Homo sapiens GN=PCDH9 PE=1 SV=2 - [PCDH9_HUMAN]	Q9HC56	N-Term(Dimethyl); T10(Hex); K18(Dimethyl)	ETciD	0.582902	1	0	1	1	Light	5.25586				0	2.71904	3	686.676	2058.01	-0.068518	81.5354
YSTVGVITVTDADAGENK	Protocadherin-9 OS=Homo sapiens GN=PCDH9 PE=1 SV=2 - [PCDH9_HUMAN]	Q9HC56	N-Term(Dimethyl:2H(4)); S2(Hex); K18(Dimethyl:2H(4))	ETciD	0.607202	1	0	1	1	Medium	3.28735				0	35.8417	3	689.359	2066.06	0.29493	77.9557
YSTVGVITVTDADAGENK	Protocadherin-9 OS=Homo sapiens GN=PCDH9 PE=1 SV=2 - [PCDH9_HUMAN]	Q9HC56	N-Term(Dimethyl:2H(4)); T8(Hex); K18(Dimethyl:2H(4))	ETciD	0.550975	1	0	1	1	Medium	3.46356				0	47.4185	2	1033.54	2066.06	0.951357	79.4476
YSTVGVITVTDADAGENK	Protocadherin-9 OS=Homo sapiens GN=PCDH9 PE=1 SV=2 - [PCDH9_HUMAN]	Q9HC56	N-Term(Dimethyl:2H(4)); T3(Hex); T8(Hex); K18(Dimethyl:2H(4))	ETciD	0.429339	1	0	1	1	Medium	1.61264				0	42.6527	2	1114.56	2228.11	-0.36336	77.3211
YSTVGVITVTDADAGENK	Protocadherin-9 OS=Homo sapiens GN=PCDH9 PE=1 SV=2 - [PCDH9_HUMAN]	Q9HC56	N-Term(Dimethyl); T3(Hex); K18(Dimethyl)	HCD	0.611392	1	0	1	1	Light		627.802	9.47184e-61	1.65882e-63	0	11.2433	2	1029.51	2058.01	0.204932	78.0394
YSTVGVITVTDADAGENK	Protocadherin-9 OS=Homo sapiens GN=PCDH9 PE=1 SV=2 - [PCDH9_HUMAN]	Q9HC56	N-Term(Dimethyl); T8(Hex); K18(Dimethyl)	HCD	0.550975	1	0	1	1	Light		807.308	1.05761e-78	1.85871e-81	0	28.5106	2	1029.51	2058.01	-0.388215	79.4957
YSTVGVITVTDADAGENK	Protocadherin-9 OS=Homo sapiens GN=PCDH9 PE=1 SV=2 - [PCDH9_HUMAN]	Q9HC56	N-Term(Dimethyl); T3(Hex); K18(Dimethyl)	HCD	0.491493	1	0	1	1	Light		479.669	5.99981e-46	1.0791e-48	0	6.74564	3	686.676	2058.01	0.465314	79.5216
YSTVGVITVTDADAGENK	Protocadherin-9 OS=Homo sapiens GN=PCDH9 PE=1 SV=2 - [PCDH9_HUMAN]	Q9HC56	N-Term(Dimethyl); T3(Hex); K18(Dimethyl)	HCD	0.554211	1	0	1	1	Light		474.406	2.0741e-45	3.62606e-48	0	47.4995	3	686.676	2058.01	-0.246462	79.9011
YSTVGVITVTDADAGENK	Protocadherin-9 OS=Homo sapiens GN=PCDH9 PE=1 SV=2 - [PCDH9_HUMAN]	Q9HC56	N-Term(Dimethyl); T3(Hex); K18(Dimethyl)	HCD	0.569718	1	0	1	1	Light		636.637	1.23856e-61	2.16911e-64	0	4.3222	2	1029.51	2058.01	0.204932	80.0256
YSTVGVITVTDADAGENK	Protocadherin-9 OS=Homo sapiens GN=PCDH9 PE=1 SV=2 - [PCDH9_HUMAN]	Q9HC56	N-Term(Dimethyl); T8(Hex); K18(Dimethyl)	HCD	0.54208	1	0	1	1	Light		791.972	3.58122e-77	6.34968e-80	0	0	2	1029.51	2058.01	0.323561	81.5302
YSTVGVITVTDADAGENK	Protocadherin-9 OS=Homo sapiens GN=PCDH9 PE=1 SV=2 - [PCDH9_HUMAN]	Q9HC56	N-Term(Dimethyl); T3(Hex); K18(Dimethyl)	HCD	0.582902	1	0	1	1	Light		460.306	5.36841e-44	9.32015e-47	0	2.71904	3	686.676	2058.01	-0.068518	81.5466
YSTVGVITVTDADAGENK	Protocadherin-9 OS=Homo sapiens GN=PCDH9 PE=1 SV=2 - [PCDH9_HUMAN]	Q9HC56	N-Term(Dimethyl); T3(Hex); T8(Hex); K18(Dimethyl)	HCD	0.626635	1	0	1	1	Light		858.161	8.70591e-84	1.52735e-86	0	0.631657	2	1110.54	2220.07	0.149602	75.8045
YSTVGVITVTDADAGENK	Protocadherin-9 OS=Homo sapiens GN=PCDH9 PE=1 SV=2 - [PCDH9_HUMAN]	Q9HC56	N-Term(Dimethyl); T3(Hex); K18(Dimethyl)	HCD	0.427876	1	0	1	1	Light		532.409	3.29046e-51	5.7425e-54	0	45.8085	3	686.676	2058.01	-0.15749	75.8559
YSTVGVITVTDADAGENK	Protocadherin-9 OS=Homo sapiens GN=PCDH9 PE=1 SV=2 - [PCDH9_HUMAN]	Q9HC56	N-Term(Dimethyl); T3(Hex); T8(Hex); K18(Dimethyl)	HCD	0.579012	1	0	1	1	Light		594.664	1.94732e-57	3.41634e-60	0	9.1596	3	740.693	2220.07	0.143546	75.8996
YSTVGVITVTDADAGENK	Protocadherin-9 OS=Homo sapiens GN=PCDH9 PE=1 SV=2 - [PCDH9_HUMAN]	Q9HC56	N-Term(Dimethyl); T3(Hex); T8(Hex); K18(Dimethyl)	HCD	0.429339	1	0	1	1	Light		725.358	1.64812e-70	2.91187e-73	0	81.5823	2	1110.54	2220.07	0.259572	77.2113
YSTVGVITVTDADAGENK	Protocadherin-9 OS=Homo sapiens GN=PCDH9 PE=1 SV=2 - [PCDH9_HUMAN]	Q9HC56	N-Term(Dimethyl); S2(Hex); T3(Hex); K18(Dimethyl)	HCD	1.06579	1	0	1	1	Light		345.268	1.67675e-32	2.97295e-35	0	45.5282	3	740.694	2220.07	0.885842	77.6222
YSTVGVITVTDADAGENK	Protocadherin-9 OS=Homo sapiens GN=PCDH9 PE=1 SV=2 - [PCDH9_HUMAN]	Q9HC56	N-Term(Dimethyl); T3(Hex); T8(Hex); K18(Dimethyl)	HCD	0.289037	1	0	1	1	Light		652.992	2.8272e-63	5.02166e-66	0	34.6097	2	1110.54	2220.07	0.589482	77.8867
YSTVGVITVTDADAGENK	Protocadherin-9 OS=Homo sapiens GN=PCDH9 PE=1 SV=2 - [PCDH9_HUMAN]	Q9HC56	N-Term(Dimethyl); T3(Hex); T8(Hex); K18(Dimethyl)	HCD	0.430883	1	0	1	1	Light		614.706	1.92877e-59	3.3838e-62	0	24.8273	2	1110.54	2220.07	0.149602	78.2229
YSTVGVITVTDADAGENK	Protocadherin-9 OS=Homo sapiens GN=PCDH9 PE=1 SV=2 - [PCDH9_HUMAN]	Q9HC56	N-Term(Dimethyl:2H(4)); T3(Hex); K18(Dimethyl:2H(4))	HCD	0.607202	1	0	1	1	Medium		331.242	3.89187e-31	7.51327e-34	0	35.8417	3	689.359	2066.06	0.29493	77.9657
ATSELSHSAK	Receptor-type tyrosine-protein phosphatase zeta OS=Homo sapiens GN=PTPRZ1 PE=1 SV=4 - [PTPRZ_HUMAN]	P23471	N-Term(Dimethyl:2H(4)); S8(Hex); K10(Dimethyl:2H(4))	ETciD	4.01316	1	0	1	1	Medium	2.16909				0	38.8606	3	419.565	1256.68	-0.460057	24.4885
ATSELSHSAK	Receptor-type tyrosine-protein phosphatase zeta OS=Homo sapiens GN=PTPRZ1 PE=1 SV=4 - [PTPRZ_HUMAN]	P23471	N-Term(Dimethyl:2H(4)); S8(Hex); K10(Dimethyl:2H(4))	HCD	4.01316	1	0	1	1	Medium		430.279	2.40998e-41	9.37737e-44	0	38.8606	3	419.565	1256.68	-0.460057	24.4997
LQLSPTASTIR	Sodium/hydrogen exchanger 1 OS=Homo sapiens GN=SLC9A1 PE=1 SV=2 - [SL9A1_HUMAN]	P19634	N-Term(Dimethyl); T6(Hex)	HCD	0.573705	1	0	1	1	Light		266.724	7.95579e-24	2.12608e-27	0	50.4662	2	688.885	1376.76	-0.0553311	70.7667
LQLSPTASTIR	Sodium/hydrogen exchanger 1 OS=Homo sapiens GN=SLC9A1 PE=1 SV=2 - [SL9A1_HUMAN]	P19634	N-Term(Dimethyl); T6(Hex); T9(Hex)	HCD	0.709513	1	0	1	1	Light		288.507	6.26351e-26	1.41038e-29	0	10.4061	2	769.912	1538.82	0.526872	67.4042
LSETIVPPINTATVPDNEDGEAK	SUN domain-containing ossification factor OS=Homo sapiens GN=SUCO PE=2 SV=1 - [SUCO_HUMAN]	Q9UBS9	N-Term(Dimethyl); T11(Hex); K23(Dimethyl)	ETciD	1.36081	1	0	1	1	Light	2.81213				0	12.1739	3	876.776	2628.31	0.372567	94.7643
LSETIVPPINTATVPDNEDGEAK	SUN domain-containing ossification factor OS=Homo sapiens GN=SUCO PE=2 SV=1 - [SUCO_HUMAN]	Q9UBS9	N-Term(Dimethyl:2H(4)); S2(Hex); T4(Hex); T11(Hex); K23(Dimethyl:2H(4))	ETciD	1.06333	1	0	1	1	Medium	2.76317				0	33.3003	3	987.495	2960.47	0.214426	90.9714
LSETIVPPINTATVPDNEDGEAK	SUN domain-containing ossification factor OS=Homo sapiens GN=SUCO PE=2 SV=1 - [SUCO_HUMAN]	Q9UBS9	N-Term(Dimethyl); T4(Hex); K23(Dimethyl)	HCD	1.36081	1	0	1	1	Light		382.294	3.73239e-36	5.89634e-39	0	12.1739	3	876.776	2628.31	0.372567	94.7745
LSETIVPPINTATVPDNEDGEAK	SUN domain-containing ossification factor OS=Homo sapiens GN=SUCO PE=2 SV=1 - [SUCO_HUMAN]	Q9UBS9	N-Term(Dimethyl); S2(Hex); T4(Hex); T13(Hex); K23(Dimethyl)	HCD	1.57286	1	0	1	1	Light		315.631	2.0153e-29	2.73446e-32	0	70.1542	3	984.812	2952.42	0.705086	90.8483
LSETIVPPINTATVPDNEDGEAK	SUN domain-containing ossification factor OS=Homo sapiens GN=SUCO PE=2 SV=1 - [SUCO_HUMAN]	Q9UBS9	N-Term(Dimethyl:2H(4)); S2(Hex); T4(Hex); T13(Hex); K23(Dimethyl:2H(4))	HCD	1.14976	1	0	1	1	Medium		317.864	1.0727e-29	1.63522e-32	0	40.9111	3	987.496	2960.47	1.01848	89.3325
LSETIVPPINTATVPDNEDGEAK	SUN domain-containing ossification factor OS=Homo sapiens GN=SUCO PE=2 SV=1 - [SUCO_HUMAN]	Q9UBS9	N-Term(Dimethyl:2H(4)); S2(Hex); T4(Hex); T13(Hex); K23(Dimethyl:2H(4))	HCD	1.06333	1	0	1	1	Medium		390.27	6.48449e-37	9.39781e-40	0	33.3003	3	987.495	2960.47	0.214426	90.9822
LSETIVPPINTATVPDNEDGEAK	SUN domain-containing ossification factor OS=Homo sapiens GN=SUCO PE=2 SV=1 - [SUCO_HUMAN]	Q9UBS9	N-Term(Dimethyl:2H(4)); T4(Hex); T11(Hex); K23(Dimethyl:2H(4))	HCD	0.953962	1	0	1	1	Medium		348.59	9.18625e-33	1.38347e-35	0	21.5669	3	933.477	2798.42	-0.0682889	94.1212
SAFRTSEGIVPTPGR	UPF0606 protein KIAA1549 OS=Homo sapiens GN=KIAA1549 PE=1 SV=4 - [K1549_HUMAN]	Q9HCM3	N-Term(Dimethyl); S1(Hex); T5(Hex); S6(Hex); T12(Hex)	ETciD	0.87485	1	0	1	1	Light	3.48251				1	68.7828	3	751.029	2251.07	0.539542	59.9433
SAFRTSEGIVPTPGR	UPF0606 protein KIAA1549 OS=Homo sapiens GN=KIAA1549 PE=1 SV=4 - [K1549_HUMAN]	Q9HCM3	N-Term(Dimethyl:2H(4)); S1(Hex); T5(Hex); S6(Hex); T12(Hex)	ETciD	0.511507	1	0	1	1	Medium	3.65448				1	67.0032	3	752.371	2255.1	0.989134	60.2632

## Sheet: Exp2
Sequence	Protein Descriptions	Protein Group Accessions	Modifications	Activation Type	Ratio (Heavy/Light)	ΔScore	ΔCn	Rank	Search Engine Rank	Quan Channel	XCorr	Amanda Score	E-Value	P-Value	# Missed Cleavages	Isolation Interference [%]	Charge	m/z [Da]	MH+ [Da]	ΔM [ppm]	RT [min]
LNEDAAVGSSVLTLQAR	Cadherin EGF LAG seven-pass G-type receptor 1 OS=Homo sapiens GN=CELSR1 PE=1 SV=1 - [CELR1_HUMAN]	Q9NYQ6	N-Term(Diethyl); S10(Hex)	ETciD	0.786808	1	0	1	1	Light	2.46962				0	39.1229	3	654.685	1962.04	0.32706	89.3429
STTAAVFLSVEDDNDNAPQFSEK	Cadherin EGF LAG seven-pass G-type receptor 2 OS=Homo sapiens GN=CELSR2 PE=2 SV=1 - [CELR2_HUMAN]	Q9HCU4	N-Term(Diethyl); T2(Hex); T3(Hex); K23(Diethyl)	ETciD	0.843439	1	0	1	1	Light	4.24788				0	4.82742	3	974.462	2921.37	1.64589	103.864
DKGSNAVVHY	Cadherin EGF LAG seven-pass G-type receptor 2 OS=Homo sapiens GN=CELSR2 PE=2 SV=1 - [CELR2_HUMAN]	Q9HCU4	N-Term(Diethyl); K2(Diethyl); S4(Hex)	ETciD	0.79439	1	0	1	1	Light	2.39405				1	24.685	3	455.242	1363.71	0.102006	46.2362
LNEDAAVGTSVVTVSAVDR	Cadherin EGF LAG seven-pass G-type receptor 2 OS=Homo sapiens GN=CELSR2 PE=2 SV=1 - [CELR2_HUMAN]	Q9HCU4	N-Term(Diethyl(H)); S10(Hex); S15(Hex)	ETciD	1.19982	1	0	1	1	Heavy	5.07355				0	37.2283	3	763.057	2287.16	-0.239248	84.8065
LNEDAAVGTSVVTVSAVDR	Cadherin EGF LAG seven-pass G-type receptor 2 OS=Homo sapiens GN=CELSR2 PE=2 SV=1 - [CELR2_HUMAN]	Q9HCU4	N-Term(Diethyl(H)); T13(Hex)	HCD	1.09695	1	0	1	1	Heavy		258.681	7.43831e-24	1.35488e-26	0	49.0895	3	709.041	2125.11	0.732474	80.0906
STTAAVFLSVEDDNDNAPQFSEK	Cadherin EGF LAG seven-pass G-type receptor 2 OS=Homo sapiens GN=CELSR2 PE=2 SV=1 - [CELR2_HUMAN]	Q9HCU4	N-Term(Diethyl(H)); T3(Hex); S9(Hex); K23(Diethyl(H))	HCD	0.740382	1	0	1	1	Heavy		390.608	6.53808e-37	8.69426e-40	0	2.72306	3	977.138	2929.4	1.62583	101.098
VTASDRDK	Cadherin EGF LAG seven-pass G-type receptor 2 OS=Homo sapiens GN=CELSR2 PE=2 SV=1 - [CELR2_HUMAN]	Q9HCU4	N-Term(Diethyl(H)); S4(Hex); K8(Diethyl(H))	HCD	0.839299	1	0	1	1	Heavy		237.98	4.72915e-22	1.59231e-24	1	15.0004	3	391.891	1173.66	-0.219262	29.8439
LNEDAAVGTSVVTVSAVDR	Cadherin EGF LAG seven-pass G-type receptor 2 OS=Homo sapiens GN=CELSR2 PE=2 SV=1 - [CELR2_HUMAN]	Q9HCU4	N-Term(Diethyl(H)); T9(Hex); S15(Hex)	HCD	1.18745	1	0	1	1	Heavy		323.258	2.97088e-30	4.72318e-33	0	17.221	2	1144.08	2287.16	-1.16738	84.3356
LNEDAAVGTSVVTVSAVDR	Cadherin EGF LAG seven-pass G-type receptor 2 OS=Homo sapiens GN=CELSR2 PE=2 SV=1 - [CELR2_HUMAN]	Q9HCU4	N-Term(Diethyl(H)); S10(Hex); S15(Hex)	HCD	1.19982	1	0	1	1	Heavy		540.363	5.86793e-52	9.19738e-55	0	37.2283	3	763.057	2287.16	-0.239248	84.8177
LNEDAAVGTSVVTVSAVDR	Cadherin EGF LAG seven-pass G-type receptor 2 OS=Homo sapiens GN=CELSR2 PE=2 SV=1 - [CELR2_HUMAN]	Q9HCU4	N-Term(Diethyl(H)); T9(Hex); T13(Hex)	HCD	1.1537	1	0	1	1	Heavy		393.199	3.07364e-37	4.7876e-40	0	43.8324	3	763.058	2287.16	0.000926026	83.0537
DKGSNAVVHY	Cadherin EGF LAG seven-pass G-type receptor 2 OS=Homo sapiens GN=CELSR2 PE=2 SV=1 - [CELR2_HUMAN]	Q9HCU4	N-Term(Diethyl(H)); K2(Diethyl(H)); S4(Hex)	HCD	0.79439	1	0	1	1	Heavy		228.418	5.99562e-20	1.43952e-23	1	89.4385	3	457.917	1371.74	0.201675	46.426
AAVGTSVVTVSAVDR	Cadherin EGF LAG seven-pass G-type receptor 2 OS=Homo sapiens GN=CELSR2 PE=2 SV=1 - [CELR2_HUMAN]	Q9HCU4	N-Term(Diethyl(H)); T5(Hex); S11(Hex)	HCD	1.38722	1	0	1	1	Heavy		223.223	3.37752e-19	4.76109e-23	0	14.6216	2	908.485	1815.96	0.622807	66.3236
TAQEPDTFMEQK	Cadherin-1 OS=Homo sapiens GN=CDH1 PE=1 SV=3 - [CADH1_HUMAN]	P12830	N-Term(Diethyl); T1(Hex); M9(Oxidation); K12(Diethyl)	ETciD	0.595204	1	0	1	1	Light	2.36202				0	13.6813	2	857.909	1714.81	0.439595	52.4939
SYTAQEPDTFMEQK	Cadherin-1 OS=Homo sapiens GN=CDH1 PE=1 SV=3 - [CADH1_HUMAN]	P12830	N-Term(Diethyl); S1(Hex); M11(Oxidation); K14(Diethyl)	ETciD	0.515784	1	0	1	1	Light	2.59001				0	19.3253	3	655.64	1964.91	0.929267	66.1272
TAQEPDTFMEQK	Cadherin-1 OS=Homo sapiens GN=CDH1 PE=1 SV=3 - [CADH1_HUMAN]	P12830	N-Term(Diethyl); T1(Hex); M9(Oxidation); K12(Diethyl)	ETciD	0.619158	1	0	1	1	Light	2.30208				0	25.1826	2	857.909	1714.81	0.653153	57.7008
TAQEPDTFMEQK	Cadherin-1 OS=Homo sapiens GN=CDH1 PE=1 SV=3 - [CADH1_HUMAN]	P12830	N-Term(Diethyl); T1(Hex); M9(Oxidation); K12(Diethyl)	ETciD	0.584674	1	0	1	1	Light	2.39703				0	10.1989	3	572.275	1714.81	0.111417	57.8157
SYTAQEPDTFMEQK	Cadherin-1 OS=Homo sapiens GN=CDH1 PE=1 SV=3 - [CADH1_HUMAN]	P12830	N-Term(Diethyl); S1(Hex); M11(Oxidation); K14(Diethyl)	ETciD	0.531691	1	0	1	1	Light	2.47808				0	0	3	655.64	1964.91	0.929267	71.5274
TAQEPDTFMEQK	Cadherin-1 OS=Homo sapiens GN=CDH1 PE=1 SV=3 - [CADH1_HUMAN]	P12830	N-Term(Diethyl(H)); T1(Hex); M9(Oxidation); K12(Diethyl(H))	HCD	0.595204	1	0	1	1	Heavy		441.426	4.23244e-41	7.20169e-45	0	2.00815	2	861.922	1722.84	0.375671	52.5251
TAQEPDTFMEQK	Cadherin-1 OS=Homo sapiens GN=CDH1 PE=1 SV=3 - [CADH1_HUMAN]	P12830	N-Term(Diethyl(H)); T1(Hex); M9(Oxidation); K12(Diethyl(H))	HCD	0.608832	1	0	1	1	Heavy		277.303	1.07037e-24	1.86087e-28	0	0	2	861.922	1722.84	-0.191163	57.6268
SNVGTSVIQVTASDADDPTYGNSAK	Cadherin-11 OS=Homo sapiens GN=CDH11 PE=1 SV=2 - [CAD11_HUMAN]	P55287	N-Term(Diethyl(H)); T11(Hex); S13(Hex); K25(Diethyl(H))	HCD	2.33829	1	0	1	1	Heavy		315.652	2.25357e-29	2.7217e-32	0	1.6913	3	981.148	2941.43	1.07921	77.1084
SNVGTSVIQVTASDADDPTYGNSAK	Cadherin-11 OS=Homo sapiens GN=CDH11 PE=1 SV=2 - [CAD11_HUMAN]	P55287	N-Term(Diethyl(H)); T5(Hex); T11(Hex); K25(Diethyl(H))	HCD	2.64976	1	0	1	1	Heavy		294.809	2.73308e-27	3.30481e-30	0	0	3	981.148	2941.43	1.01696	80.8963
GIQHPPQSTATVSVTVIDVNENPYFAPNPK	Cadherin-2 OS=Homo sapiens GN=CDH2 PE=1 SV=4 - [CADH2_HUMAN]	P19022	N-Term(Diethyl); T9(Hex); T11(Hex); S13(Hex); T15(Hex); K30(Diethyl)	ETciD	0.66283	1	0	1	1	Light	4.08368				0	0	3	1327.66	3980.97	0.864876	97.5927
GIQHPPQSTATVSVTVIDVNENPYFAPNPK	Cadherin-2 OS=Homo sapiens GN=CDH2 PE=1 SV=4 - [CADH2_HUMAN]	P19022	N-Term(Diethyl); T9(Hex); T11(Hex); S13(Hex); K30(Diethyl)	ETciD	0.53579	1	0	1	1	Light	2.97662				0	22.6437	5	764.589	3818.91	0.598357	100.435
GIQHPPQSTATVSVTVIDVNENPYFAPNPK	Cadherin-2 OS=Homo sapiens GN=CDH2 PE=1 SV=4 - [CADH2_HUMAN]	P19022	N-Term(Diethyl); T9(Hex); T11(Hex); S13(Hex); T15(Hex); K30(Diethyl)	ETciD	0.663753	1	0	1	1	Light	4.49979				0	0.305006	3	1327.66	3980.98	3.71657	103.716
GIQHPPQSTATVSVTVIDVNENPYFAPNPK	Cadherin-2 OS=Homo sapiens GN=CDH2 PE=1 SV=4 - [CADH2_HUMAN]	P19022	N-Term(Diethyl); T9(Hex); T11(Hex); S13(Hex); T15(Hex); K30(Diethyl)	ETciD	0.822325	1	0	1	1	Light	3.85735				0	25.5853	5	796.999	3980.96	0.214188	102.623
GIQHPPQSTATVSVTVIDVNENPYFAPNPK	Cadherin-2 OS=Homo sapiens GN=CDH2 PE=1 SV=4 - [CADH2_HUMAN]	P19022	N-Term(Diethyl); T9(Hex); T11(Hex); S13(Hex); T15(Hex); K30(Diethyl)	ETciD	0.700846	1	0	1	1	Light	5.58366				0	0.121904	4	995.998	3980.97	1.79673	102.65
GIQHPPQSTATVSVTVIDVNENPYFAPNPK	Cadherin-2 OS=Homo sapiens GN=CDH2 PE=1 SV=4 - [CADH2_HUMAN]	P19022	N-Term(Diethyl); T9(Hex); T11(Hex); S13(Hex); T15(Hex); K30(Diethyl)	ETciD	0.680113	1	0	1	1	Light	4.36828				0	0.102022	3	1327.66	3980.97	2.24473	102.827
GIQHPPQSTATVSVTVIDVNENPYFAPNPK	Cadherin-2 OS=Homo sapiens GN=CDH2 PE=1 SV=4 - [CADH2_HUMAN]	P19022	N-Term(Diethyl); T9(Hex); T11(Hex); S13(Hex); K30(Diethyl)	ETciD	0.662665	1	0	1	1	Light	4.5077				0	7.10435	3	1273.64	3818.91	0.541469	103.848
GIQHPPQSTATVSVTVIDVNENPYFAPNPK	Cadherin-2 OS=Homo sapiens GN=CDH2 PE=1 SV=4 - [CADH2_HUMAN]	P19022	N-Term(Diethyl); T9(Hex); T11(Hex); S13(Hex); T15(Hex); K30(Diethyl)	ETciD	0.704036	1	0	1	1	Light	4.18143				0	0.306057	3	1327.66	3980.97	0.864876	103.77
LTTFTAQDPDR	Cadherin-2 OS=Homo sapiens GN=CDH2 PE=1 SV=4 - [CADH2_HUMAN]	P19022	N-Term(Diethyl); T5(Hex)	ETciD	0.918121	1	0	1	1	Light	1.6226				0	1.45043	2	741.872	1482.74	3.41732	61.6798
MLTTFTAQDPDR	Cadherin-2 OS=Homo sapiens GN=CDH2 PE=1 SV=4 - [CADH2_HUMAN]	P19022	N-Term(Diethyl); M1(Oxidation); T6(Hex)	ETciD	0.913458	1	0	1	1	Light	1.81791				0	2.40028	2	815.388	1629.77	0.853046	66.5204
TVTAIDADDPNALNGMLR	Cadherin-2 OS=Homo sapiens GN=CDH2 PE=1 SV=4 - [CADH2_HUMAN]	P19022	N-Term(Diethyl); T3(Hex); M16(Oxidation)	ETciD	0.852282	1	0	1	1	Light	3.95538				0	38.7718	3	707.684	2121.04	0.0668824	85.7127
TVTAIDADDPNALNGMLR	Cadherin-2 OS=Homo sapiens GN=CDH2 PE=1 SV=4 - [CADH2_HUMAN]	P19022	N-Term(Diethyl); T1(Hex); M16(Oxidation)	ETciD	0.841725	1	0	1	1	Light	2.50321				0	0	2	1061.02	2121.04	1.51202	86.0004
VMTVTAIDADDPNALNGMLR	Cadherin-2 OS=Homo sapiens GN=CDH2 PE=1 SV=4 - [CADH2_HUMAN]	P19022	N-Term(Diethyl); M2(Oxidation); T3(Hex); M18(Oxidation)	ETciD	0.825462	1	0	1	1	Light	2.23442				0	37.9394	3	789.719	2367.14	-0.0234226	88.3591
TVTAIDADDPNALNGMLR	Cadherin-2 OS=Homo sapiens GN=CDH2 PE=1 SV=4 - [CADH2_HUMAN]	P19022	N-Term(Diethyl); T3(Hex); M16(Oxidation)	ETciD	0.833157	1	0	1	1	Light	3.49529				0	42.1723	3	707.684	2121.04	0.239539	90.8369
QEEGLHAGTMLTTFTAQDPDR	Cadherin-2 OS=Homo sapiens GN=CDH2 PE=1 SV=4 - [CADH2_HUMAN]	P19022	N-Term(Diethyl(H)); M10(Oxidation); T15(Hex)	ETciD	1.61795	1	0	1	1	Heavy	4.57175				0	31.6099	3	852.737	2556.2	0.107843	76.5862
TAQDPDRYMQQNIR	Cadherin-2 OS=Homo sapiens GN=CDH2 PE=1 SV=4 - [CADH2_HUMAN]	P19022	N-Term(Diethyl(H)); T1(Hex); M9(Oxidation)	ETciD	1.061	1	0	1	1	Heavy	2.41308				1	52.0493	3	658.652	1973.94	0.2151	52.4138
LTTFTAQDPDR	Cadherin-2 OS=Homo sapiens GN=CDH2 PE=1 SV=4 - [CADH2_HUMAN]	P19022	N-Term(Diethyl(H)); T5(Hex)	ETciD	0.885375	1	0	1	1	Heavy	1.93463				0	19.4828	2	743.877	1486.75	0.293291	68.049
MLTTFTAQDPDR	Cadherin-2 OS=Homo sapiens GN=CDH2 PE=1 SV=4 - [CADH2_HUMAN]	P19022	N-Term(Diethyl(H)); M1(Oxidation); T6(Hex)	ETciD	0.91432	1	0	1	1	Heavy	2.17824				0	24.8332	2	817.395	1633.78	0.855684	72.5276
SNISILR	Cadherin-2 OS=Homo sapiens GN=CDH2 PE=1 SV=4 - [CADH2_HUMAN]	P19022	N-Term(Diethyl(H)); S4(Hex)	HCD	1.14104	1	0	1	1	Heavy		310.592	2.40837e-29	8.72598e-32	0	15.8358	2	512.808	1024.61	2.35924	59.987
QEEGLHAGTMLTTFTAQDPDR	Cadherin-2 OS=Homo sapiens GN=CDH2 PE=1 SV=4 - [CADH2_HUMAN]	P19022	N-Term(Diethyl(H)); M10(Oxidation); T13(Hex)	HCD	1.61795	1	0	1	1	Heavy		599.723	5.00913e-58	1.06577e-60	0	31.6099	3	852.737	2556.2	0.107843	76.5963
QEEGLHAGTMLTTFTAQDPDR	Cadherin-2 OS=Homo sapiens GN=CDH2 PE=1 SV=4 - [CADH2_HUMAN]	P19022	N-Term(Diethyl(H)); M10(Oxidation); T12(Hex)	HCD	1.7307	1	0	1	1	Heavy		336.796	9.57741e-32	2.09114e-34	0	30.0343	3	852.737	2556.2	-0.178685	86.3986
TTFTAQDPDR	Cadherin-2 OS=Homo sapiens GN=CDH2 PE=1 SV=4 - [CADH2_HUMAN]	P19022	N-Term(Diethyl(H)); T4(Hex)	HCD	0.940149	1	0	1	1	Heavy		425.081	1.07241e-39	3.10394e-43	0	25.0555	2	687.335	1373.66	0.290904	49.183
LTTFTAQDPDR	Cadherin-2 OS=Homo sapiens GN=CDH2 PE=1 SV=4 - [CADH2_HUMAN]	P19022	N-Term(Diethyl(H)); T5(Hex)	HCD	0.918121	1	0	1	1	Heavy		396.912	1.05767e-36	2.03593e-40	0	43.3281	2	743.877	1486.75	0.293291	61.5698
MLTTFTAQDPDR	Cadherin-2 OS=Homo sapiens GN=CDH2 PE=1 SV=4 - [CADH2_HUMAN]	P19022	N-Term(Diethyl(H)); M1(Oxidation); T6(Hex)	HCD	0.900082	1	0	1	1	Heavy		261.519	3.54632e-23	7.04894e-27	0	29.2069	2	817.395	1633.78	1.07983	65.7327
MLTTFTAQDPDR	Cadherin-2 OS=Homo sapiens GN=CDH2 PE=1 SV=4 - [CADH2_HUMAN]	P19022	N-Term(Diethyl(H)); M1(Oxidation); T6(Hex)	HCD	0.913458	1	0	1	1	Heavy		413.153	2.24912e-38	4.8389e-42	0	29.6089	2	817.394	1633.78	0.0338041	66.42
TFTAQDPDR	Cadherin-2 OS=Homo sapiens GN=CDH2 PE=1 SV=4 - [CADH2_HUMAN]	P19022	N-Term(Diethyl(H)); T3(Hex)	HCD	0.68003	1	0	1	1	Heavy		333.606	1.40307e-30	4.35872e-34	0	19.2225	2	636.811	1272.61	0.275112	52.3842
TTFTAQDPDR	Cadherin-2 OS=Homo sapiens GN=CDH2 PE=1 SV=4 - [CADH2_HUMAN]	P19022	N-Term(Diethyl(H)); T4(Hex)	HCD	0.962937	1	0	1	1	Heavy		367.183	6.58613e-34	1.9129e-37	0	20.9154	2	687.335	1373.66	0.379769	54.7891
LTTFTAQDPDR	Cadherin-2 OS=Homo sapiens GN=CDH2 PE=1 SV=4 - [CADH2_HUMAN]	P19022	N-Term(Diethyl(H)); T5(Hex)	HCD	0.885375	1	0	1	1	Heavy		471.89	3.36178e-44	6.47118e-48	0	19.4828	2	743.877	1486.75	0.293291	68.062
LTTFTAQDPDR	Cadherin-2 OS=Homo sapiens GN=CDH2 PE=1 SV=4 - [CADH2_HUMAN]	P19022	N-Term(Diethyl(H)); T3(Hex)	HCD	0.954875	1	0	1	1	Heavy		306.849	1.01684e-27	2.0659e-31	0	36.0246	2	743.877	1486.75	0.539608	67.1434
MLTTFTAQDPDR	Cadherin-2 OS=Homo sapiens GN=CDH2 PE=1 SV=4 - [CADH2_HUMAN]	P19022	N-Term(Diethyl(H)); M1(Oxidation); T6(Hex)	HCD	0.90611	1	0	1	1	Heavy		323.005	2.5183e-29	5.00557e-33	0	19.9735	2	817.395	1633.78	1.07983	71.767
MLTTFTAQDPDR	Cadherin-2 OS=Homo sapiens GN=CDH2 PE=1 SV=4 - [CADH2_HUMAN]	P19022	N-Term(Diethyl(H)); M1(Oxidation); T6(Hex)	HCD	0.91432	1	0	1	1	Heavy		461.078	3.92822e-43	7.80182e-47	0	24.8332	2	817.395	1633.78	0.855684	72.5379
TMLTTFTAQDPDR	Cadherin-2 OS=Homo sapiens GN=CDH2 PE=1 SV=4 - [CADH2_HUMAN]	P19022	N-Term(Diethyl(H)); M2(Oxidation); T4(Hex)	HCD	0.942449	1	0	1	1	Heavy		226.385	1.29288e-19	2.29886e-23	0	25.9729	2	867.919	1734.83	0.552915	76.9377
SVLESAPISSTVGR	Cadherin-20 OS=Homo sapiens GN=CDH20 PE=2 SV=2 - [CAD20_HUMAN]	Q9HBT6	N-Term(Diethyl(H)); T11(Hex)	HCD	2.06913	1	0	1	1	Heavy		351.095	4.1999e-32	7.77184e-36	0	33.6274	2	812.945	1624.88	0.419113	77.2088
VVEVQEGIPTGEPVCVYTAEDPDKENQK	Cadherin-3 OS=Homo sapiens GN=CDH3 PE=1 SV=2 - [CADH3_HUMAN]	P22223	N-Term(Diethyl); C15(Carbamidomethyl); T18(Hex); K24(Diethyl); K28(Diethyl)	ETciD	0.158628	1	0	1	1	Light	4.36525				1	0	4	865.939	3460.73	0.881666	93.3868
LTVTDLDAPNSPAWR	Cadherin-3 OS=Homo sapiens GN=CDH3 PE=1 SV=2 - [CADH3_HUMAN]	P22223	N-Term(Diethyl); T2(Hex)	ETciD	0.324314	1	0	1	1	Light	2.64466				0	0	2	937.482	1873.96	0.915131	103.72
TAEDPDKENQK	Cadherin-3 OS=Homo sapiens GN=CDH3 PE=1 SV=2 - [CADH3_HUMAN]	P22223	N-Term(Diethyl); T1(Hex); K7(Diethyl); K11(Diethyl)	ETciD	0.18396	1	0	1	1	Light	2.38488				1	27.1478	3	535.614	1604.83	0.448248	25.9011
TAEDPDKENQK	Cadherin-3 OS=Homo sapiens GN=CDH3 PE=1 SV=2 - [CADH3_HUMAN]	P22223	N-Term(Diethyl); T1(Hex); K7(Diethyl); K11(Diethyl)	ETciD	0.184125	1	0	1	1	Light	2.40847				1	28.9728	3	535.614	1604.83	0.334151	35.4427
TVTANDADDSTTANGMVR	Cadherin-4 OS=Homo sapiens GN=CDH4 PE=2 SV=2 - [CADH4_HUMAN]	P55283	N-Term(Diethyl); T1(Hex); M16(Oxidation)	ETciD	1.04577	1	0	1	1	Light	2.6343				0	45.3273	3	691.648	2072.93	0.617307	42.4557
TVTANDADDSTTANGMVR	Cadherin-4 OS=Homo sapiens GN=CDH4 PE=2 SV=2 - [CADH4_HUMAN]	P55283	N-Term(Diethyl(H)); T1(Hex); M16(Oxidation)	HCD	1.02746	1	0	1	1	Heavy		345.791	1.40078e-31	2.63602e-35	0	20.1886	2	1038.97	2076.94	0.15612	42.4407
TVTANDADDSTTANGMVR	Cadherin-4 OS=Homo sapiens GN=CDH4 PE=2 SV=2 - [CADH4_HUMAN]	P55283	N-Term(Diethyl(H)); S10(Hex); M16(Oxidation)	HCD	1.04577	1	0	1	1	Heavy		482.164	3.10072e-45	6.07627e-49	0	42.9085	3	692.985	2076.94	-0.496869	42.6175
VGTTVGQVCATDKDEPDTMHTR	Desmocollin-2 OS=Homo sapiens GN=DSC2 PE=1 SV=1 - [DSC2_HUMAN]	Q02487	N-Term(Diethyl); T3(Hex); C9(Carbamidomethyl); K13(Diethyl); M19(Oxidation)	ETciD	0.80052	1	0	1	1	Light	2.26663				1	9.65534	3	903.431	2708.28	1.00324	62.424
VTVEDKDLVNTANWR	Desmocollin-2 OS=Homo sapiens GN=DSC2 PE=1 SV=1 - [DSC2_HUMAN]	Q02487	N-Term(Diethyl); T2(Hex); K6(Diethyl)	ETciD	0.827562	1	0	1	1	Light	3.27321				1	37.4606	3	678.697	2034.08	0.614042	94.4542
VGTTVGQVCATDKDEPDTMHTR	Desmocollin-2 OS=Homo sapiens GN=DSC2 PE=1 SV=1 - [DSC2_HUMAN]	Q02487	N-Term(Diethyl(H)); T3(Hex); C9(Carbamidomethyl); K13(Diethyl(H)); M19(Oxidation)	ETciD	0.890275	1	0	1	1	Heavy	6.05932				1	9.48452	4	679.832	2716.3	0.843733	49.218
VGTTVGQVCATDKDEPDTMHTR	Desmocollin-2 OS=Homo sapiens GN=DSC2 PE=1 SV=1 - [DSC2_HUMAN]	Q02487	N-Term(Diethyl(H)); T3(Hex); C9(Carbamidomethyl); K13(Diethyl(H)); M19(Oxidation)	ETciD	0.830826	1	0	1	1	Heavy	3.79379				1	9.01378	3	906.106	2716.3	0.713864	49.2545
VGTTVGQVCATDKDEPDTMHTR	Desmocollin-2 OS=Homo sapiens GN=DSC2 PE=1 SV=1 - [DSC2_HUMAN]	Q02487	N-Term(Diethyl(H)); T3(Hex); C9(Carbamidomethyl); K13(Diethyl(H)); M19(Oxidation)	ETciD	0.795026	1	0	1	1	Heavy	4.9182				1	22.5283	4	679.832	2716.31	1.11337	62.3707
VTVEDK	Desmocollin-2 OS=Homo sapiens GN=DSC2 PE=1 SV=1 - [DSC2_HUMAN]	Q02487	N-Term(Diethyl(H)); T2(Hex); K6(Diethyl(H))	HCD	0.902406	1	0	1	1	Heavy		232.206	1.0952e-21	6.0176e-24	0	4.48769	2	486.789	972.571	-0.608433	34.6374
VGTTVGQVCATDKDEPDTMHTR	Desmocollin-2 OS=Homo sapiens GN=DSC2 PE=1 SV=1 - [DSC2_HUMAN]	Q02487	N-Term(Diethyl(H)); T4(Hex); C9(Carbamidomethyl); K13(Diethyl(H)); M19(Oxidation)	HCD	0.890275	1	0	1	1	Heavy		663.968	2.82352e-64	4.01068e-67	1	9.48452	4	679.832	2716.3	0.843733	49.2272
VGTTVGQVCATDKDEPDTMHTR	Desmocollin-2 OS=Homo sapiens GN=DSC2 PE=1 SV=1 - [DSC2_HUMAN]	Q02487	N-Term(Diethyl(H)); T4(Hex); C9(Carbamidomethyl); K13(Diethyl(H)); M19(Oxidation)	HCD	0.830826	1	0	1	1	Heavy		283.849	2.88522e-26	4.12174e-29	1	9.01378	3	906.106	2716.3	0.713864	49.2642
VTVEDK	Desmocollin-2 OS=Homo sapiens GN=DSC2 PE=1 SV=1 - [DSC2_HUMAN]	Q02487	N-Term(Diethyl(H)); T2(Hex); K6(Diethyl(H))	HCD	0.900404	1	0	1	1	Heavy		249.447	2.06716e-23	1.1358e-25	0	4.47075	2	486.789	972.571	-0.671189	40.755
VGTTVGQVCATDKDEPDTMHTR	Desmocollin-2 OS=Homo sapiens GN=DSC2 PE=1 SV=1 - [DSC2_HUMAN]	Q02487	N-Term(Diethyl(H)); T4(Hex); C9(Carbamidomethyl); K13(Diethyl(H)); M19(Oxidation)	HCD	0.795026	1	0	1	1	Heavy		532.209	4.29981e-51	6.01372e-54	1	22.5283	4	679.832	2716.31	1.11337	62.3863
DPVPGKPTVTIR	Dystroglycan OS=Homo sapiens GN=DAG1 PE=1 SV=2 - [DAG1_HUMAN]	Q14118	N-Term(Diethyl); K6(Diethyl); T8(Hex); T10(Hex)	ETciD	1.13314	1	0	1	1	Light	2.54573				0	7.72606	3	572.661	1715.97	0.727865	64.8606
DPVPGKPTVTIR	Dystroglycan OS=Homo sapiens GN=DAG1 PE=1 SV=2 - [DAG1_HUMAN]	Q14118	N-Term(Diethyl(H)); K6(Diethyl(H)); T8(Hex); T10(Hex)	ETciD	1.08636	1	0	1	1	Heavy	2.69018				0	6.06428	3	575.336	1723.99	0.166995	74.6128
DPVPGKPTVTIR	Dystroglycan OS=Homo sapiens GN=DAG1 PE=1 SV=2 - [DAG1_HUMAN]	Q14118	N-Term(Diethyl(H)); K6(Diethyl(H)); T8(Hex); T10(Hex)	HCD	1.13314	1	0	1	1	Heavy		408.659	3.44501e-39	1.36166e-41	0	9.2064	3	575.337	1724	0.273205	64.9326
LETASPPTR	Dystroglycan OS=Homo sapiens GN=DAG1 PE=1 SV=2 - [DAG1_HUMAN]	Q14118	N-Term(Diethyl(H)); T3(Hex)	HCD	1.55435	1	0	1	1	Heavy		207.764	3.66496e-19	1.6735e-21	0	16.272	2	597.326	1193.64	0.249395	44.1063
DPVPGKPTVTIR	Dystroglycan OS=Homo sapiens GN=DAG1 PE=1 SV=2 - [DAG1_HUMAN]	Q14118	N-Term(Diethyl(H)); K6(Diethyl(H)); T8(Hex); T10(Hex)	HCD	1.08636	1	0	1	1	Heavy		328.186	3.75068e-31	1.51849e-33	0	6.06428	3	575.336	1723.99	0.166995	74.6239
KPTVTIR	Dystroglycan OS=Homo sapiens GN=DAG1 PE=1 SV=2 - [DAG1_HUMAN]	Q14118	K1(Diethyl(H)); N-Term(Diethyl(H)); T3(Hex); T5(Hex)	HCD	0.62675	1	0	1	1	Heavy		297.506	3.18381e-27	1.77569e-30	0	8.41676	3	420.262	1258.77	-0.790796	53.791
SEALPTDLPAPSAPDLTEPK	Glucosidase 2 subunit beta OS=Homo sapiens GN=PRKCSH PE=1 SV=2 - [GLU2B_HUMAN]	P14314	N-Term(Diethyl(H)); S12(Hex); K20(Diethyl(H))	HCD	0.441976	1	0	1	1	Heavy		230.841	4.00396e-21	8.23861e-24	0	11.2776	3	777.753	2331.25	0.737436	102.81
SFISGGSTITGVGK	Hepatocyte growth factor receptor OS=Homo sapiens GN=MET PE=1 SV=4 - [MET_HUMAN]	P08581	N-Term(Diethyl(H)); T8(Hex); K14(Diethyl(H))	ETciD	1255.38	1	0	1	1	Heavy	1.90083				0	42.7721	2	796.954	1592.9	0.207705	79.2494
SFISGGSTITGVGK	Hepatocyte growth factor receptor OS=Homo sapiens GN=MET PE=1 SV=4 - [MET_HUMAN]	P08581	N-Term(Diethyl(H)); S7(Hex); K14(Diethyl(H))	ETciD	42233.4	1	0	1	1	Heavy	2.67403				0	5.41331	2	796.953	1592.9	-0.175465	83.1317
SFISGGSTITGVGK	Hepatocyte growth factor receptor OS=Homo sapiens GN=MET PE=1 SV=4 - [MET_HUMAN]	P08581	N-Term(Diethyl(H)); T10(Hex); K14(Diethyl(H))	ETciD	2471.01	1	0	1	1	Heavy	2.09532				0	1.37995	2	796.954	1592.9	0.360973	87.0219
SFISGGSTITGVGK	Hepatocyte growth factor receptor OS=Homo sapiens GN=MET PE=1 SV=4 - [MET_HUMAN]	P08581	N-Term(Diethyl(H)); T8(Hex); K14(Diethyl(H))	ETciD	1966.85	1	0	1	1	Heavy	3.06395				0	3.5821	2	796.955	1592.9	1.51048	91.3451
AGGTLLTLTGNYLNSGNSR	Hepatocyte growth factor receptor OS=Homo sapiens GN=MET PE=1 SV=4 - [MET_HUMAN]	P08581	N-Term(Diethyl(H)); T7(Hex)	ETciD	210.902	1	0	1	1	Heavy	2.56096				0	0	3	711.041	2131.11	0.8597	103.359
YGPMAGGTLLTLTGN	Hepatocyte growth factor receptor OS=Homo sapiens GN=MET PE=1 SV=4 - [MET_HUMAN]	P08581	N-Term(Diethyl(H)); M4(Oxidation); T11(Hex)	ETciD	2331.02	1	0	1	1	Heavy	3.02742				0	3.55239	2	852.434	1703.86	0.317268	103.834
SFISGGSTITGVGK	Hepatocyte growth factor receptor OS=Homo sapiens GN=MET PE=1 SV=4 - [MET_HUMAN]	P08581	N-Term(Diethyl(H)); T8(Hex); K14(Diethyl(H))	HCD	1160.74	1	0	1	1	Heavy		446.997	5.23072e-43	1.99646e-45	0	42.7721	2	796.954	1592.9	0.207705	79.2597
SFISGGSTITGVGK	Hepatocyte growth factor receptor OS=Homo sapiens GN=MET PE=1 SV=4 - [MET_HUMAN]	P08581	N-Term(Diethyl(H)); T10(Hex); K14(Diethyl(H))	HCD	39049.8	1	0	1	1	Heavy		705.106	8.23941e-69	3.08592e-71	0	5.41331	2	796.953	1592.9	-0.175465	83.1438
SFISGGSTITGVGK	Hepatocyte growth factor receptor OS=Homo sapiens GN=MET PE=1 SV=4 - [MET_HUMAN]	P08581	N-Term(Diethyl(H)); T10(Hex); K14(Diethyl(H))	HCD	2284.74	1	0	1	1	Heavy		418.977	3.31615e-40	1.26571e-42	0	1.37995	2	796.954	1592.9	0.360973	87.0326
SFISGGSTITGVGK	Hepatocyte growth factor receptor OS=Homo sapiens GN=MET PE=1 SV=4 - [MET_HUMAN]	P08581	N-Term(Diethyl(H)); T10(Hex); K14(Diethyl(H))	HCD	1966.85	1	0	1	1	Heavy		699.07	3.34507e-68	1.23891e-70	0	3.5821	2	796.955	1592.9	1.51048	91.3557
SFISGGSTITGVGK	Hepatocyte growth factor receptor OS=Homo sapiens GN=MET PE=1 SV=4 - [MET_HUMAN]	P08581	N-Term(Diethyl(H)); T8(Hex); K14(Diethyl(H))	HCD	5282.84	1	0	1	1	Heavy		413.264	1.20271e-39	4.71651e-42	0	5.79012	2	796.954	1592.9	0.0544371	88.0561
SFISGGSTITGVGK	Hepatocyte growth factor receptor OS=Homo sapiens GN=MET PE=1 SV=4 - [MET_HUMAN]	P08581	N-Term(Diethyl(H)); T8(Hex); K14(Diethyl(H))	HCD	2066.29	1	0	1	1	Heavy		424.32	9.31925e-41	3.69811e-43	0	0	2	796.954	1592.9	0.514241	90.3313
GSTITGVGK	Hepatocyte growth factor receptor OS=Homo sapiens GN=MET PE=1 SV=4 - [MET_HUMAN]	P08581	N-Term(Diethyl(H)); T5(Hex); K9(Diethyl(H))	HCD	258.261	1	0	1	1	Heavy		230.239	2.57124e-20	9.46354e-24	0	21.0705	2	551.335	1101.66	0.506403	43.688
AGGTLLTLTGNYLNSGNSR	Hepatocyte growth factor receptor OS=Homo sapiens GN=MET PE=1 SV=4 - [MET_HUMAN]	P08581	N-Term(Diethyl(H)); T4(Hex)	HCD	318.676	1	0	1	1	Heavy		298.434	1.34929e-26	1.43404e-30	0	0	2	1066.06	2131.11	-0.365515	103.336
AGGTLLTLTGNYLNSGNSR	Hepatocyte growth factor receptor OS=Homo sapiens GN=MET PE=1 SV=4 - [MET_HUMAN]	P08581	N-Term(Diethyl(H)); T9(Hex)	HCD	195.003	1	0	1	1	Heavy		337.235	1.67183e-30	1.89035e-34	0	0	3	711.041	2131.11	0.8597	103.37
YGPMAGGTLLTLTGN	Hepatocyte growth factor receptor OS=Homo sapiens GN=MET PE=1 SV=4 - [MET_HUMAN]	P08581	N-Term(Diethyl(H)); M4(Oxidation); T13(Hex)	HCD	2155.3	1	0	1	1	Heavy		287.156	1.29892e-25	1.9249e-29	0	3.55239	2	852.434	1703.86	0.317268	103.845
GGGGNFGPGPGSNFR	Heterogeneous nuclear ribonucleoproteins A2/B1 OS=Homo sapiens GN=HNRNPA2B1 PE=1 SV=2 - [ROA2_HUMAN]	P22626	N-Term(Diethyl); S12(Hex)	ETciD	0.791068	1	0	1	1	Light	1.76885				0	47.7762	2	798.377	1595.75	0.749523	61.5448
GGGGNFGPGPGSNFR	Heterogeneous nuclear ribonucleoproteins A2/B1 OS=Homo sapiens GN=HNRNPA2B1 PE=1 SV=2 - [ROA2_HUMAN]	P22626	N-Term(Diethyl(H)); S12(Hex)	HCD	0.791068	1	0	1	1	Heavy		307.493	2.33307e-29	1.78097e-31	0	33.7402	2	800.383	1599.76	-0.0868821	61.5919
FGSTADALVSDDETTR	Melanoma inhibitory activity protein 3 OS=Homo sapiens GN=MIA3 PE=1 SV=1 - [MIA3_HUMAN]	Q5JRA6	N-Term(Diethyl(H)); T4(Hex)	HCD	1.05866	1	0	1	1	Heavy		258.533	2.24319e-24	1.402e-26	0	17.4345	2	953.952	1906.9	0.688309	70.9502
TAELNVQVPEEPTHLDQR	Melanoma inhibitory activity protein 3 OS=Homo sapiens GN=MIA3 PE=1 SV=1 - [MIA3_HUMAN]	Q5JRA6	N-Term(Diethyl(H)); T1(Hex)	HCD	1.11184	1	0	1	1	Heavy		278.981	7.35903e-26	1.26444e-28	0	40.9315	3	766.727	2298.17	0.251918	81.1286
TAELNVQVPEEPTHLDQR	Melanoma inhibitory activity protein 3 OS=Homo sapiens GN=MIA3 PE=1 SV=1 - [MIA3_HUMAN]	Q5JRA6	N-Term(Diethyl(H)); T13(Hex)	HCD	1.14083	1	0	1	1	Heavy		201.657	4.10395e-18	6.82853e-21	0	40.8007	3	766.727	2298.17	0.490942	90.15
NVPTANPTEPGIR	Neurexin-3-beta OS=Homo sapiens GN=NRXN3 PE=1 SV=4 - [NRX3B_HUMAN]	Q9HDB5	N-Term(Diethyl); T4(Hex)	ETciD	0.556641	1	0	1	1	Light	1.52638				0	0.722176	2	792.418	1583.83	0.287423	62.8515
NVPTANPTEPGIR	Neurexin-3-beta OS=Homo sapiens GN=NRXN3 PE=1 SV=4 - [NRX3B_HUMAN]	Q9HDB5	N-Term(Diethyl); T4(Hex)	ETciD	0.541694	1	0	1	1	Light	1.88209				0	1.96736	2	792.418	1583.83	0.981079	68.7863
LTITGENLGLR	Plexin-A1 OS=Homo sapiens GN=PLXNA1 PE=1 SV=3 - [PLXA1_HUMAN]	Q9UIW2	N-Term(Diethyl(H)); T2(Hex)	ETciD	139.992	1	0	1	1	Heavy	2.2598				0	25.8169	2	704.908	1408.81	0.428716	91.6557
LTITGENLGLR	Plexin-A1 OS=Homo sapiens GN=PLXNA1 PE=1 SV=3 - [PLXA1_HUMAN]	Q9UIW2	N-Term(Diethyl(H)); T2(Hex)	ETciD	148.35	1	0	1	1	Heavy	2.50292				0	1.70882	2	704.909	1408.81	1.46849	99.0486
SGGTLLTVTGTNLATVR	Plexin-A1 OS=Homo sapiens GN=PLXNA1 PE=1 SV=3 - [PLXA1_HUMAN]	Q9UIW2	N-Term(Diethyl(H)); T7(Hex)	ETciD	291.917	1	0	1	1	Heavy	2.57979				0	0	3	628.356	1883.05	0.34891	94.2716
SGGTLLTVTGTNLATVR	Plexin-A1 OS=Homo sapiens GN=PLXNA1 PE=1 SV=3 - [PLXA1_HUMAN]	Q9UIW2	N-Term(Diethyl(H)); T7(Hex)	ETciD	1222.66	1	0	1	1	Heavy	2.62604				0	2.55893	3	628.356	1883.05	0.251672	100.938
LTITGENLGLR	Plexin-A1 OS=Homo sapiens GN=PLXNA1 PE=1 SV=3 - [PLXA1_HUMAN]	Q9UIW2	N-Term(Diethyl(H)); T2(Hex)	HCD	139.992	1	0	1	1	Heavy		343.479	1.10858e-32	4.48817e-35	0	25.8169	2	704.908	1408.81	0.428716	91.6667
LTITGENLGLR	Plexin-A1 OS=Homo sapiens GN=PLXNA1 PE=1 SV=3 - [PLXA1_HUMAN]	Q9UIW2	N-Term(Diethyl(H)); T2(Hex)	HCD	148.35	1	0	1	1	Heavy		419.976	2.49348e-40	1.00543e-42	0	1.70882	2	704.909	1408.81	1.46849	99.0621
SGGTLLTVTGTNLATVR	Plexin-A1 OS=Homo sapiens GN=PLXNA1 PE=1 SV=3 - [PLXA1_HUMAN]	Q9UIW2	N-Term(Diethyl(H)); S1(Hex)	HCD	379.778	1	0	1	1	Heavy		379.536	5.27914e-35	1.1128e-38	0	16.2334	2	942.03	1883.05	0.420877	94.258
SGGTLLTVTGTNLATVR	Plexin-A1 OS=Homo sapiens GN=PLXNA1 PE=1 SV=3 - [PLXA1_HUMAN]	Q9UIW2	N-Term(Diethyl(H)); T7(Hex)	HCD	269.911	1	0	1	1	Heavy		277.045	9.33511e-25	1.97485e-28	0	0	3	628.356	1883.05	0.34891	94.2838
SGGTLLTVTGTNLATVR	Plexin-A1 OS=Homo sapiens GN=PLXNA1 PE=1 SV=3 - [PLXA1_HUMAN]	Q9UIW2	N-Term(Diethyl(H)); S1(Hex)	HCD	1130.49	1	0	1	1	Heavy		324.419	1.7039e-29	3.61532e-33	0	2.55893	3	628.356	1883.05	0.251672	100.948
SGGTLLTVTGTNLATVR	Plexin-A1 OS=Homo sapiens GN=PLXNA1 PE=1 SV=3 - [PLXA1_HUMAN]	Q9UIW2	N-Term(Diethyl(H)); T4(Hex)	HCD	1963.12	1	0	1	1	Heavy		390.466	4.16213e-36	8.98173e-40	0	2.00309	2	942.03	1883.05	0.745005	101.155
SGGTLLTVTGTNLATVR	Plexin-A1 OS=Homo sapiens GN=PLXNA1 PE=1 SV=3 - [PLXA1_HUMAN]	Q9UIW2	N-Term(Diethyl(H)); T4(Hex)	HCD	535.925	1	0	1	1	Heavy		299.606	5.19442e-27	1.09495e-30	0	4.63076	2	942.03	1883.05	0.420877	98.5906
SGGTLLTVTGTNLATVR	Plexin-A1 OS=Homo sapiens GN=PLXNA1 PE=1 SV=3 - [PLXA1_HUMAN]	Q9UIW2	N-Term(Diethyl(H)); S1(Hex)	HCD	297.86	1	0	1	1	Heavy		248.588	6.52384e-22	1.38422e-25	0	3.89913	3	628.356	1883.05	0.251672	98.6792
GPESGGTMVTITGH	Plexin-A2 OS=Homo sapiens GN=PLXNA2 PE=1 SV=4 - [PLXA2_HUMAN]	O75051	N-Term(Diethyl(H)); M8(Oxidation); T10(Hex)	ETciD	801.38	1	0	1	1	Heavy	2.16406				0	7.26475	2	791.379	1581.75	0.68392	47.6804
GPESGGTMVTITGH	Plexin-A2 OS=Homo sapiens GN=PLXNA2 PE=1 SV=4 - [PLXA2_HUMAN]	O75051	N-Term(Diethyl(H)); M8(Oxidation); T12(Hex)	HCD	740.969	1	0	1	1	Heavy		326.005	1.07539e-29	2.50908e-33	0	7.26475	2	791.379	1581.75	0.68392	47.6937
GPESGGTMVTITGH	Plexin-A2 OS=Homo sapiens GN=PLXNA2 PE=1 SV=4 - [PLXA2_HUMAN]	O75051	N-Term(Diethyl(H)); T7(Hex); M8(Oxidation)	HCD	1937.23	1	0	1	1	Heavy		248.828	5.43056e-22	1.30983e-25	0	25.6842	2	791.379	1581.75	0.529572	51.3319
LTISGSSLDAGSR	Plexin-A3 OS=Homo sapiens GN=PLXNA3 PE=1 SV=2 - [PLXA3_HUMAN]	P51805	N-Term(Diethyl(H)); T2(Hex)	ETciD	125.243	1	0	1	1	Heavy	1.95354				0	39.2394	2	743.398	1485.79	3.49052	78.2931
LTISGSSLDAGSR	Plexin-A3 OS=Homo sapiens GN=PLXNA3 PE=1 SV=2 - [PLXA3_HUMAN]	P51805	N-Term(Diethyl(H)); T2(Hex)	HCD	121.397	1	0	1	1	Heavy		324.062	1.34233e-30	3.92496e-33	0	35.0705	2	743.395	1485.78	0.532806	72.4613
VTIVGDNLGLLSR	Plexin-A3 OS=Homo sapiens GN=PLXNA3 PE=1 SV=2 - [PLXA3_HUMAN]	P51805	N-Term(Diethyl(H)); T2(Hex)	HCD	1583.96	1	0	1	1	Heavy		468.278	3.55263e-45	1.48646e-47	0	15.9898	2	789.961	1578.91	0.646653	103.914
LTISGSSLDAGSR	Plexin-A3 OS=Homo sapiens GN=PLXNA3 PE=1 SV=2 - [PLXA3_HUMAN]	P51805	N-Term(Diethyl(H)); T2(Hex)	HCD	125.243	1	0	1	1	Heavy		434.942	1.20509e-41	3.20503e-44	0	39.2394	2	743.398	1485.79	3.49052	78.3062
ITILGSNLGVQAGDIQR	Plexin-B2 OS=Homo sapiens GN=PLXNB2 PE=1 SV=3 - [PLXB2_HUMAN]	O15031	N-Term(Diethyl(H)); T2(Hex)	ETciD	42627.3	1	0	1	1	Heavy	3.07229				0	5.38918	2	989.056	1977.11	0.149126	104.095
SVEPQQGPQAGGTTLTIHGTHLDTGSQEDVR	Plexin-B2 OS=Homo sapiens GN=PLXNB2 PE=1 SV=3 - [PLXB2_HUMAN]	O15031	N-Term(Diethyl(H)); T16(Hex)	ETciD	677.983	1	0	1	1	Heavy	3.79492				0	13.8708	4	860.425	3438.68	-0.497745	86.6548
SVEPQQGPQAGGTTLTIHGTHLDTGSQEDVR	Plexin-B2 OS=Homo sapiens GN=PLXNB2 PE=1 SV=3 - [PLXB2_HUMAN]	O15031	N-Term(Diethyl(H)); T16(Hex)	ETciD	547.175	1	0	1	1	Heavy	3.52145				0	1.59539	4	860.427	3438.68	1.06422	84.389
ITILGSNLGVQAGDIQR	Plexin-B2 OS=Homo sapiens GN=PLXNB2 PE=1 SV=3 - [PLXB2_HUMAN]	O15031	N-Term(Diethyl(H)); T2(Hex)	HCD	39413.9	1	0	1	1	Heavy		644.805	9.98802e-63	3.30729e-65	0	5.38918	2	989.056	1977.11	0.149126	104.109
ITILGSNLGVQAGDIQR	Plexin-B2 OS=Homo sapiens GN=PLXNB2 PE=1 SV=3 - [PLXB2_HUMAN]	O15031	N-Term(Diethyl(H)); T2(Hex)	HCD	9965.22	1	0	1	1	Heavy		354.138	1.10296e-33	3.85651e-36	0	1.5327	3	659.707	1977.11	0.852357	104.144
ITILGSNLGVQAGDIQR	Plexin-B2 OS=Homo sapiens GN=PLXNB2 PE=1 SV=3 - [PLXB2_HUMAN]	O15031	N-Term(Diethyl(H)); S6(Hex)	HCD	42692.8	1	0	1	1	Heavy		356.314	6.28636e-34	2.33694e-36	0	1.71836	3	659.708	1977.11	2.88983	104.338
SVEPQQGPQAGGTTLTIHGTHLDTGSQEDVR	Plexin-B2 OS=Homo sapiens GN=PLXNB2 PE=1 SV=3 - [PLXB2_HUMAN]	O15031	N-Term(Diethyl(H)); T13(Hex)	HCD	1854.99	1	0	1	1	Heavy		437.909	2.63301e-40	1.61862e-44	0	14.2619	4	860.425	3438.68	-0.28475	73.5732
SVEPQQGPQAGGTTLTIHGTHLDTGSQEDVR	Plexin-B2 OS=Homo sapiens GN=PLXNB2 PE=1 SV=3 - [PLXB2_HUMAN]	O15031	N-Term(Diethyl(H)); T16(Hex)	HCD	626.875	1	0	1	1	Heavy		503.878	6.641e-47	4.09483e-51	0	13.8708	4	860.425	3438.68	-0.497745	86.6695
SVEPQQGPQAGGTTLTIHGTHLDTGSQEDVR	Plexin-B2 OS=Homo sapiens GN=PLXNB2 PE=1 SV=3 - [PLXB2_HUMAN]	O15031	N-Term(Diethyl(H)); T14(Hex)	HCD	2067.64	1	0	1	1	Heavy		355.656	4.43751e-32	2.71923e-36	0	0	4	860.425	3438.68	-0.639742	82.0986
SVEPQQGPQAGGTTLTIHGTHLDTGSQEDVR	Plexin-B2 OS=Homo sapiens GN=PLXNB2 PE=1 SV=3 - [PLXB2_HUMAN]	O15031	N-Term(Diethyl(H)); T16(Hex)	HCD	505.927	1	0	1	1	Heavy		454.306	6.07966e-42	3.7105e-46	0	1.59539	4	860.427	3438.68	1.06422	84.3994
SGPLDGGTLLTIR	Plexin-D1 OS=Homo sapiens GN=PLXND1 PE=1 SV=3 - [PLXD1_HUMAN]	Q9Y4D7	N-Term(Diethyl(H)); T11(Hex)	ETciD	14086.7	1	0	1	1	Heavy	2.53662				0	39.2193	2	761.432	1521.86	0.42282	104.156
TITVAGER	Plexin-D1 OS=Homo sapiens GN=PLXND1 PE=1 SV=3 - [PLXD1_HUMAN]	Q9Y4D7	N-Term(Diethyl(H)); T3(Hex)	HCD	1860.51	1	0	1	1	Heavy		327.48	5.91361e-31	1.78659e-33	0	40.1701	2	534.802	1068.6	0.460733	43.2969
TITVAGER	Plexin-D1 OS=Homo sapiens GN=PLXND1 PE=1 SV=3 - [PLXD1_HUMAN]	Q9Y4D7	N-Term(Diethyl(H)); T3(Hex)	HCD	111.757	1	0	1	1	Heavy		328.931	4.23394e-31	1.27914e-33	0	10.5454	2	534.802	1068.6	0.460733	50.9133
SGPLDGGTLLTIR	Plexin-D1 OS=Homo sapiens GN=PLXND1 PE=1 SV=3 - [PLXD1_HUMAN]	Q9Y4D7	N-Term(Diethyl(H)); T8(Hex)	HCD	720.736	1	0	1	1	Heavy		222.927	1.98555e-19	5.09638e-23	0	24.203	2	761.432	1521.86	0.262397	101.181
SGPLDGGTLLTIR	Plexin-D1 OS=Homo sapiens GN=PLXND1 PE=1 SV=3 - [PLXD1_HUMAN]	Q9Y4D7	N-Term(Diethyl(H)); T11(Hex)	HCD	13024.8	1	0	1	1	Heavy		513.447	1.68374e-48	4.52131e-52	0	39.2193	2	761.432	1521.86	0.42282	104.168
SGPLDGGTLLTIR	Plexin-D1 OS=Homo sapiens GN=PLXND1 PE=1 SV=3 - [PLXD1_HUMAN]	Q9Y4D7	N-Term(Diethyl(H)); T11(Hex)	HCD	2220.09	1	0	1	1	Heavy		306.945	7.52501e-28	2.02068e-31	0	43.9259	2	761.432	1521.86	0.42282	102.963
GVSGYPTLK	Protein disulfide-isomerase A3 OS=Homo sapiens GN=PDIA3 PE=1 SV=4 - [PDIA3_HUMAN]	P30101	N-Term(Diethyl); S3(Hex); K9(Diethyl)	ETciD	0.919331	1	0	1	1	Light	1.98985				0	1.18148	2	598.345	1195.68	1.11393	66.4935
GVSGYPTLK	Protein disulfide-isomerase A3 OS=Homo sapiens GN=PDIA3 PE=1 SV=4 - [PDIA3_HUMAN]	P30101	N-Term(Diethyl); S3(Hex); K9(Diethyl)	ETciD	0.907194	1	0	1	1	Light	1.73894				0	2.2712	2	598.345	1195.68	0.399283	74.0277
YGVSGYPTLK	Protein disulfide-isomerase A3 OS=Homo sapiens GN=PDIA3 PE=1 SV=4 - [PDIA3_HUMAN]	P30101	N-Term(Diethyl(H)); S4(Hex); K10(Diethyl(H))	ETciD	0.768188	1	0	1	1	Heavy	2.65696				0	0	2	683.889	1366.77	-0.596586	78.7554
YGVSGYPTLK	Protein disulfide-isomerase A3 OS=Homo sapiens GN=PDIA3 PE=1 SV=4 - [PDIA3_HUMAN]	P30101	N-Term(Diethyl(H)); T8(Hex); K10(Diethyl(H))	ETciD	0.913013	1	0	1	1	Heavy	2.06008				0	39.1277	2	683.89	1366.77	-0.0607085	83.0807
YGVSGYPTLK	Protein disulfide-isomerase A3 OS=Homo sapiens GN=PDIA3 PE=1 SV=4 - [PDIA3_HUMAN]	P30101	N-Term(Diethyl(H)); S4(Hex); K10(Diethyl(H))	ETciD	0.998088	1	0	1	1	Heavy	2.45643				0	9.78515	2	683.89	1366.77	0.921732	83.8019
YGVSGYPTLK	Protein disulfide-isomerase A3 OS=Homo sapiens GN=PDIA3 PE=1 SV=4 - [PDIA3_HUMAN]	P30101	N-Term(Diethyl(H)); S4(Hex); K10(Diethyl(H))	ETciD	0.94777	1	0	1	1	Heavy	2.28701				0	3.21812	2	683.89	1366.77	-0.150021	85.9329
YGVSGYPTLK	Protein disulfide-isomerase A3 OS=Homo sapiens GN=PDIA3 PE=1 SV=4 - [PDIA3_HUMAN]	P30101	N-Term(Diethyl(H)); S4(Hex); K10(Diethyl(H))	ETciD	0.935424	1	0	1	1	Heavy	2.23403				0	3.61368	2	683.89	1366.77	-0.150021	86.6463
YGVSGYPTLK	Protein disulfide-isomerase A3 OS=Homo sapiens GN=PDIA3 PE=1 SV=4 - [PDIA3_HUMAN]	P30101	N-Term(Diethyl(H)); S4(Hex); K10(Diethyl(H))	ETciD	0.956072	1	0	1	1	Heavy	2.56683				0	3.80695	2	683.89	1366.77	0.0286043	83.9018
YGVSGYPTLK	Protein disulfide-isomerase A3 OS=Homo sapiens GN=PDIA3 PE=1 SV=4 - [PDIA3_HUMAN]	P30101	N-Term(Diethyl(H)); S4(Hex); K10(Diethyl(H))	ETciD	0.961154	1	0	1	1	Heavy	2.63448				0	4.38799	2	683.89	1366.77	0.20723	86.0924
YGVSGYPTLK	Protein disulfide-isomerase A3 OS=Homo sapiens GN=PDIA3 PE=1 SV=4 - [PDIA3_HUMAN]	P30101	N-Term(Diethyl(H)); S4(Hex); K10(Diethyl(H))	HCD	0.768188	1	0	1	1	Heavy		467.067	6.09048e-45	1.96467e-47	0	3.57627	2	683.89	1366.77	-0.328647	78.7791
YGVSGYPTLK	Protein disulfide-isomerase A3 OS=Homo sapiens GN=PDIA3 PE=1 SV=4 - [PDIA3_HUMAN]	P30101	N-Term(Diethyl(H)); T8(Hex); K10(Diethyl(H))	HCD	0.913013	1	0	1	1	Heavy		307.119	5.86268e-29	1.94129e-31	0	39.1277	2	683.89	1366.77	-0.0607085	83.0929
YGVSGYPTLK	Protein disulfide-isomerase A3 OS=Homo sapiens GN=PDIA3 PE=1 SV=4 - [PDIA3_HUMAN]	P30101	N-Term(Diethyl(H)); S4(Hex); K10(Diethyl(H))	HCD	0.998088	1	0	1	1	Heavy		461.077	2.43468e-44	7.80346e-47	0	3.5692	2	683.889	1366.77	-0.507273	84.5149
YGVSGYPTLK	Protein disulfide-isomerase A3 OS=Homo sapiens GN=PDIA3 PE=1 SV=4 - [PDIA3_HUMAN]	P30101	N-Term(Diethyl(H)); S4(Hex); K10(Diethyl(H))	HCD	0.935424	1	0	1	1	Heavy		444.846	9.89544e-43	3.27664e-45	0	3.61368	2	683.89	1366.77	-0.150021	86.6617
YGVSGYPTLK	Protein disulfide-isomerase A3 OS=Homo sapiens GN=PDIA3 PE=1 SV=4 - [PDIA3_HUMAN]	P30101	N-Term(Diethyl(H)); S4(Hex); K10(Diethyl(H))	HCD	0.94777	1	0	1	1	Heavy		438.224	4.54602e-42	1.50531e-44	0	3.21812	2	683.89	1366.77	-0.150021	85.946
YGVSGYPTLK	Protein disulfide-isomerase A3 OS=Homo sapiens GN=PDIA3 PE=1 SV=4 - [PDIA3_HUMAN]	P30101	N-Term(Diethyl(H)); S4(Hex); K10(Diethyl(H))	HCD	0.956072	1	0	1	1	Heavy		473.022	1.50576e-45	4.98597e-48	0	3.26	2	683.89	1366.77	0.117917	83.2144
YGVSGYPTLK	Protein disulfide-isomerase A3 OS=Homo sapiens GN=PDIA3 PE=1 SV=4 - [PDIA3_HUMAN]	P30101	N-Term(Diethyl(H)); S4(Hex); K10(Diethyl(H))	HCD	0.961154	1	0	1	1	Heavy		410.234	2.86163e-39	9.47558e-42	0	4.38799	2	683.89	1366.77	0.20723	86.1033
GVSGYPTLK	Protein disulfide-isomerase A3 OS=Homo sapiens GN=PDIA3 PE=1 SV=4 - [PDIA3_HUMAN]	P30101	N-Term(Diethyl(H)); S3(Hex); K9(Diethyl(H))	HCD	0.921557	1	0	1	1	Heavy		400.699	2.68514e-37	8.51345e-41	0	4.20203	2	602.358	1203.71	0.206648	66.3935
GVSGYPTLK	Protein disulfide-isomerase A3 OS=Homo sapiens GN=PDIA3 PE=1 SV=4 - [PDIA3_HUMAN]	P30101	N-Term(Diethyl(H)); T7(Hex); K9(Diethyl(H))	HCD	0.932553	1	0	1	1	Heavy		380.619	2.74456e-35	8.67159e-39	0	7.54075	2	602.358	1203.71	0.00382438	73.9482
LLLTATDGGKPELTGTVR	Protocadherin alpha-11 OS=Homo sapiens GN=PCDHA11 PE=2 SV=1 - [PCDAB_HUMAN]	Q9Y5I1	N-Term(Diethyl); K10(Diethyl); T14(Hex); T16(Hex)	ETciD	0.723368	1	0	1	1	Light	2.70085				0	44.7244	3	760.094	2278.27	0.920934	95.5345
ENNPPGCHIFTVSAR	Protocadherin alpha-11 OS=Homo sapiens GN=PCDHA11 PE=2 SV=1 - [PCDAB_HUMAN]	Q9Y5I1	N-Term(Diethyl(H)); C7(Carbamidomethyl); S13(Hex)	HCD	1.05859	1	0	1	1	Heavy		294.277	1.44167e-27	3.7349e-30	0	38.0462	3	640.983	1920.94	2.34961	63.8405
DGGSPSLWATAR	Protocadherin alpha-11 OS=Homo sapiens GN=PCDHA11 PE=2 SV=1 - [PCDAB_HUMAN]	Q9Y5I1	N-Term(Diethyl(H)); T10(Hex)	HCD	1.05469	1	0	1	1	Heavy		263.543	1.14117e-24	4.42315e-27	0	45.617	2	720.364	1439.72	0.296684	78.7745
SGTALVR	Protocadherin beta-7 OS=Homo sapiens GN=PCDHB7 PE=2 SV=1 - [PCDB7_HUMAN]	Q9Y5E2	N-Term(Diethyl(H)); S1(Hex); T3(Hex)	ETciD	1.07728	1	0	1	1	Heavy	1.89637				0	10.0474	2	544.299	1087.59	0.278692	34.5034
SGTALVR	Protocadherin beta-7 OS=Homo sapiens GN=PCDHB7 PE=2 SV=1 - [PCDB7_HUMAN]	Q9Y5E2	N-Term(Diethyl(H)); S1(Hex); T3(Hex)	HCD	1.10806	1	0	1	1	Heavy		244.516	9.26179e-23	3.53504e-25	0	14.4126	2	544.3	1087.59	0.390931	28.3305
SGTALVR	Protocadherin beta-7 OS=Homo sapiens GN=PCDHB7 PE=2 SV=1 - [PCDB7_HUMAN]	Q9Y5E2	N-Term(Diethyl(H)); S1(Hex); T3(Hex)	HCD	1.11869	1	0	1	1	Heavy		215.762	6.95156e-20	2.65327e-22	0	10.0474	2	544.299	1087.59	0.278692	34.5144
YVTAVDR	Protocadherin Fat 1 OS=Homo sapiens GN=FAT1 PE=1 SV=2 - [FAT1_HUMAN]	Q14517	N-Term(Diethyl(H)); T3(Hex)	HCD	1.2495	1	0	1	1	Heavy		216.292	5.30829e-20	2.3488e-22	0	38.6332	2	523.284	1045.56	0.257108	40.7984
AAFDENVPIGTTVM	Protocadherin Fat 1 OS=Homo sapiens GN=FAT1 PE=1 SV=2 - [FAT1_HUMAN]	Q14517	N-Term(Diethyl(H)); T11(Hex); M14(Oxidation)	HCD	1.40137	1	0	1	1	Heavy		261.126	4.61685e-23	7.71662e-27	0	38.3923	2	851.918	1702.83	0.319685	91.6326
ASDADSGTNGQVMY	Protocadherin Fat 1 OS=Homo sapiens GN=FAT1 PE=1 SV=2 - [FAT1_HUMAN]	Q14517	N-Term(Diethyl(H)); T8(Hex); M13(Oxidation)	HCD	0.896289	1	0	1	1	Heavy		225.697	2.84682e-20	2.69331e-23	0	29.3995	2	827.353	1653.7	0.884235	52.8931
IGTSVLQVTAR	Protocadherin Fat 3 OS=Homo sapiens GN=FAT3 PE=2 SV=2 - [FAT3_HUMAN]	Q8TDW7	N-Term(Diethyl); T9(Hex)	ETciD	0.763497	1	0	1	1	Light	2.65119				0	16.1286	2	681.896	1362.78	0.400743	73.871
DVSVIQIQAEDPDSSSNEK	Protocadherin Fat 3 OS=Homo sapiens GN=FAT3 PE=2 SV=2 - [FAT3_HUMAN]	Q8TDW7	N-Term(Diethyl); S3(Hex); K19(Diethyl)	ETciD	0.692939	1	0	1	1	Light	5.56402				0	0.098851	3	779.052	2335.14	1.26423	88.0221
IGTSVLQVTAR	Protocadherin Fat 3 OS=Homo sapiens GN=FAT3 PE=2 SV=2 - [FAT3_HUMAN]	Q8TDW7	N-Term(Diethyl); T3(Hex); T9(Hex)	ETciD	0.827425	1	0	1	1	Light	2.08899				0	1.55468	2	762.923	1524.84	0.939814	75.0471
DVSVIQIQAEDPDSSSNEK	Protocadherin Fat 3 OS=Homo sapiens GN=FAT3 PE=2 SV=2 - [FAT3_HUMAN]	Q8TDW7	N-Term(Diethyl(H)); S3(Hex); K19(Diethyl(H))	HCD	0.692939	1	0	1	1	Heavy		613.835	2.70003e-59	4.1348e-62	0	4.40086	3	781.728	2343.17	0.615296	88.0855
GSPSQSTSVK	Protocadherin Fat 4 OS=Homo sapiens GN=FAT4 PE=1 SV=2 - [FAT4_HUMAN]	Q6V0I7	N-Term(Diethyl); S6(Hex); S8(Hex); K10(Diethyl)	ETciD	0.832415	1	0	1	1	Light	2.76545				0	0	2	707.365	1413.72	1.15888	24.1437
SSDKGSPSQSTSVK	Protocadherin Fat 4 OS=Homo sapiens GN=FAT4 PE=1 SV=2 - [FAT4_HUMAN]	Q6V0I7	N-Term(Diethyl); K4(Diethyl); S10(Hex); S12(Hex); K14(Diethyl)	ETciD	0.436538	1	0	1	1	Light	3.50012				1	3.3628	3	629.662	1886.97	0.837346	25.7161
VTTSDEDIGINAISR	Protocadherin Fat 4 OS=Homo sapiens GN=FAT4 PE=1 SV=2 - [FAT4_HUMAN]	Q6V0I7	N-Term(Diethyl); T2(Hex)	ETciD	0.973178	1	0	1	1	Light	1.91726				0	0	2	904.96	1808.91	0.644872	80.1437
VTTSDEDIGIN	Protocadherin Fat 4 OS=Homo sapiens GN=FAT4 PE=1 SV=2 - [FAT4_HUMAN]	Q6V0I7	N-Term(Diethyl); T3(Hex)	ETciD	1.04902	1	0	1	1	Light	2.19169				0	23.2021	2	691.333	1381.66	1.06987	67.6773
VTTSDEDIGIN	Protocadherin Fat 4 OS=Homo sapiens GN=FAT4 PE=1 SV=2 - [FAT4_HUMAN]	Q6V0I7	N-Term(Diethyl); T3(Hex)	ETciD	1.03798	1	0	1	1	Light	1.66044				0	25.2058	2	691.333	1381.66	0.628119	69.5972
GSPSQSTSVK	Protocadherin Fat 4 OS=Homo sapiens GN=FAT4 PE=1 SV=2 - [FAT4_HUMAN]	Q6V0I7	N-Term(Diethyl(H)); S6(Hex); S8(Hex); K10(Diethyl(H))	ETciD	0.816548	1	0	1	1	Heavy	1.91135				0	4.07403	2	711.378	1421.75	0.562205	23.5327
GSPSQSTSVK	Protocadherin Fat 4 OS=Homo sapiens GN=FAT4 PE=1 SV=2 - [FAT4_HUMAN]	Q6V0I7	N-Term(Diethyl(H)); S6(Hex); S8(Hex); K10(Diethyl(H))	ETciD	0.840936	1	0	1	1	Heavy	2.65511				0	7.07345	2	711.378	1421.75	0.390487	29.1846
SSSTSVLVTVTDVNDNPPR	Protocadherin Fat 4 OS=Homo sapiens GN=FAT4 PE=1 SV=2 - [FAT4_HUMAN]	Q6V0I7	N-Term(Diethyl(H)); S2(Hex); S3(Hex); S5(Hex)	ETciD	1.11339	1	0	1	1	Heavy	2.57857				0	38.7554	3	845.414	2534.23	0.349802	74.4595
SAHVPENSPLGYTVTR	Protocadherin Fat 4 OS=Homo sapiens GN=FAT4 PE=1 SV=2 - [FAT4_HUMAN]	Q6V0I7	N-Term(Diethyl(H)); T13(Hex)	ETciD	1.14188	1	0	1	1	Heavy	4.58148				0	53.2025	3	650.672	1950	0.34884	77.4976
GSPSQSTSVK	Protocadherin Fat 4 OS=Homo sapiens GN=FAT4 PE=1 SV=2 - [FAT4_HUMAN]	Q6V0I7	N-Term(Diethyl(H)); S4(Hex); T7(Hex); K10(Diethyl(H))	HCD	0.853363	1	0	1	1	Heavy		275.367	8.42761e-26	2.90607e-28	0	4.07403	2	711.378	1421.75	0.562205	23.5433
GSPSQSTSVK	Protocadherin Fat 4 OS=Homo sapiens GN=FAT4 PE=1 SV=2 - [FAT4_HUMAN]	Q6V0I7	N-Term(Diethyl(H)); S6(Hex); T7(Hex); K10(Diethyl(H))	HCD	0.832415	1	0	1	1	Heavy		455.807	7.61541e-44	2.626e-46	0	4.25445	2	711.378	1421.75	0.476346	24.2411
SSDKGSPSQSTSVK	Protocadherin Fat 4 OS=Homo sapiens GN=FAT4 PE=1 SV=2 - [FAT4_HUMAN]	Q6V0I7	N-Term(Diethyl(H)); K4(Diethyl(H)); S6(Hex); T11(Hex); K14(Diethyl(H))	HCD	0.436538	1	0	1	1	Heavy		331.928	3.11775e-31	6.41512e-34	1	3.49294	3	633.675	1899.01	0.844256	25.7685
GVPSLTGR	Protocadherin Fat 4 OS=Homo sapiens GN=FAT4 PE=1 SV=2 - [FAT4_HUMAN]	Q6V0I7	N-Term(Diethyl(H)); T6(Hex)	HCD	1.22222	1	0	1	1	Heavy		230.922	1.68218e-21	8.08742e-24	0	21.6811	2	504.791	1008.58	-0.165791	56.9636
VTTSDEDIGINAISR	Protocadherin Fat 4 OS=Homo sapiens GN=FAT4 PE=1 SV=2 - [FAT4_HUMAN]	Q6V0I7	N-Term(Diethyl(H)); T2(Hex)	HCD	0.973178	1	0	1	1	Heavy		224.503	1.77988e-20	3.54558e-23	0	23.1966	2	906.967	1812.93	0.513044	79.8373
GSPSQSTSVK	Protocadherin Fat 4 OS=Homo sapiens GN=FAT4 PE=1 SV=2 - [FAT4_HUMAN]	Q6V0I7	N-Term(Diethyl(H)); S6(Hex); T7(Hex); K10(Diethyl(H))	HCD	0.840936	1	0	1	1	Heavy		437.245	5.5063e-42	1.88572e-44	0	7.07345	2	711.378	1421.75	0.390487	29.1971
GVPSLTGR	Protocadherin Fat 4 OS=Homo sapiens GN=FAT4 PE=1 SV=2 - [FAT4_HUMAN]	Q6V0I7	N-Term(Diethyl(H)); T6(Hex)	HCD	1.09842	1	0	1	1	Heavy		303.866	9.19777e-29	4.10615e-31	0	16.9985	2	504.792	1008.58	0.13679	63.0928
VTTSDEDIGINAISR	Protocadherin Fat 4 OS=Homo sapiens GN=FAT4 PE=1 SV=2 - [FAT4_HUMAN]	Q6V0I7	N-Term(Diethyl(H)); S4(Hex)	HCD	1.15893	1	0	1	1	Heavy		278.819	5.84025e-26	1.31242e-28	0	76.5103	3	604.98	1812.93	-0.268706	84.4977
VTTSDEDIGINAISR	Protocadherin Fat 4 OS=Homo sapiens GN=FAT4 PE=1 SV=2 - [FAT4_HUMAN]	Q6V0I7	N-Term(Diethyl(H)); T2(Hex)	HCD	1.08631	1	0	1	1	Heavy		245.41	1.28898e-22	2.87718e-25	0	17.6417	2	906.966	1812.92	-0.564289	85.1221
VTTSDEDIGIN	Protocadherin Fat 4 OS=Homo sapiens GN=FAT4 PE=1 SV=2 - [FAT4_HUMAN]	Q6V0I7	N-Term(Diethyl(H)); T2(Hex)	HCD	1.04902	1	0	1	1	Heavy		228.326	4.8794e-20	1.47014e-23	0	29.9205	2	693.34	1385.67	1.33664	67.5922
SSSTSVLVTVTDVNDNPPR	Protocadherin Fat 4 OS=Homo sapiens GN=FAT4 PE=1 SV=2 - [FAT4_HUMAN]	Q6V0I7	N-Term(Diethyl(H)); T4(Hex); S5(Hex); T11(Hex)	HCD	1.11339	1	0	1	1	Heavy		591.476	8.14101e-56	7.11813e-60	0	38.7554	3	845.414	2534.23	0.349802	74.4738
VTTSDEDIGIN	Protocadherin Fat 4 OS=Homo sapiens GN=FAT4 PE=1 SV=2 - [FAT4_HUMAN]	Q6V0I7	N-Term(Diethyl(H)); T2(Hex)	HCD	1.03798	1	0	1	1	Heavy		222.322	2.06331e-19	5.85835e-23	0	61.074	2	693.34	1385.67	0.455692	69.5008
SAHVPENSPLGYTVTR	Protocadherin Fat 4 OS=Homo sapiens GN=FAT4 PE=1 SV=2 - [FAT4_HUMAN]	Q6V0I7	N-Term(Diethyl(H)); T13(Hex)	HCD	1.14188	1	0	1	1	Heavy		555.833	2.14173e-52	2.61059e-56	0	53.2025	3	650.672	1950	0.34884	77.5079
GASIFSVTALDPDSK	Protocadherin gamma-A11 OS=Homo sapiens GN=PCDHGA11 PE=1 SV=1 - [PCDGB_HUMAN]	Q9Y5H2	N-Term(Diethyl); S3(Hex); S6(Hex); K15(Diethyl)	ETciD	1.61391	1	0	1	1	Light	2.12358				0	36.6303	2	972.502	1944	1.07226	103.817
GASIFSVTALDPDSK	Protocadherin gamma-A11 OS=Homo sapiens GN=PCDHGA11 PE=1 SV=1 - [PCDGB_HUMAN]	Q9Y5H2	N-Term(Diethyl(H)); S3(Hex); T8(Hex); K15(Diethyl(H))	HCD	1.61391	1	0	1	1	Heavy		528.956	6.07891e-51	1.27174e-53	0	42.5259	2	976.516	1952.02	1.07578	103.823
GASIFSVTALDPDSK	Protocadherin gamma-A11 OS=Homo sapiens GN=PCDHGA11 PE=1 SV=1 - [PCDGB_HUMAN]	Q9Y5H2	N-Term(Diethyl(H)); S3(Hex); S14(Hex); K15(Diethyl(H))	HCD	1.47655	1	0	1	1	Heavy		278.921	6.70452e-26	1.28193e-28	0	18.2581	3	651.346	1952.02	0.380999	103.836
SVTALDPDSK	Protocadherin gamma-A11 OS=Homo sapiens GN=PCDHGA11 PE=1 SV=1 - [PCDGB_HUMAN]	Q9Y5H2	N-Term(Diethyl(H)); T3(Hex); K10(Diethyl(H))	HCD	1.08145	1	0	1	1	Heavy		225.158	1.19723e-19	3.04949e-23	0	64.5252	2	657.867	1314.73	0.695809	61.0437
SVTALDPDSK	Protocadherin gamma-A11 OS=Homo sapiens GN=PCDHGA11 PE=1 SV=1 - [PCDGB_HUMAN]	Q9Y5H2	N-Term(Diethyl(H)); S1(Hex); K10(Diethyl(H))	HCD	1.2206	1	0	1	1	Heavy		323.605	1.73019e-29	4.36037e-33	0	0	2	657.867	1314.73	0.417264	67.5861
LVLTALDGGHPPLSGTTELR	Protocadherin gamma-B5 OS=Homo sapiens GN=PCDHGB5 PE=2 SV=1 - [PCDGH_HUMAN]	Q9Y5G0	N-Term(Diethyl(H)); T16(Hex); T17(Hex)	ETciD	1.1962	1	0	1	1	Heavy	2.76537				0	31.9813	3	811.105	2431.3	0.611808	97.426
TALDGGHPPLSGTTELR	Protocadherin gamma-B5 OS=Homo sapiens GN=PCDHGB5 PE=2 SV=1 - [PCDGH_HUMAN]	Q9Y5G0	N-Term(Diethyl(H)); T13(Hex); T14(Hex)	ETciD	1.14494	1	0	1	1	Heavy	2.51458				0	37.6792	3	702.693	2106.06	0.381677	74.7722
LVLTALDGGHPPLSGTTELR	Protocadherin gamma-B5 OS=Homo sapiens GN=PCDHGB5 PE=2 SV=1 - [PCDGH_HUMAN]	Q9Y5G0	N-Term(Diethyl(H)); T16(Hex); T17(Hex)	HCD	1.14935	1	0	1	1	Heavy		533.963	1.82304e-51	4.01551e-54	0	35.1594	3	811.105	2431.3	0.310561	94.913
LVLTALDGGHPPLSGTTELR	Protocadherin gamma-B5 OS=Homo sapiens GN=PCDHGB5 PE=2 SV=1 - [PCDGH_HUMAN]	Q9Y5G0	N-Term(Diethyl(H)); S14(Hex); T16(Hex)	HCD	1.1962	1	0	1	1	Heavy		503.905	1.81081e-48	4.06924e-51	0	31.9813	3	811.105	2431.3	0.611808	97.4347
TALDGGHPPLSGTTELR	Protocadherin gamma-B5 OS=Homo sapiens GN=PCDHGB5 PE=2 SV=1 - [PCDGH_HUMAN]	Q9Y5G0	N-Term(Diethyl(H)); S11(Hex); T13(Hex)	HCD	1.07019	1	0	1	1	Heavy		296.997	1.90264e-26	1.99668e-30	0	50.3606	3	702.693	2106.06	0.294735	64.8852
DGGHPPLSGTTELR	Protocadherin gamma-B5 OS=Homo sapiens GN=PCDHGB5 PE=2 SV=1 - [PCDGH_HUMAN]	Q9Y5G0	N-Term(Diethyl(H)); T10(Hex); T11(Hex)	HCD	1.07701	1	0	1	1	Heavy		284.904	2.23994e-25	3.2327e-29	0	58.7502	3	607.636	1820.89	-0.739566	57.7692
TALDGGHPPLSGTTELR	Protocadherin gamma-B5 OS=Homo sapiens GN=PCDHGB5 PE=2 SV=1 - [PCDGH_HUMAN]	Q9Y5G0	N-Term(Diethyl(H)); S11(Hex); T13(Hex)	HCD	1.14494	1	0	1	1	Heavy		566.41	2.1598e-53	2.28574e-57	0	37.6792	3	702.693	2106.06	0.381677	74.783
FERPSYEAELSENSPIGHSVIQVK	Protocadherin-1 OS=Homo sapiens GN=PCDH1 PE=1 SV=2 - [PCDH1_HUMAN]	Q08174	N-Term(Diethyl(H)); S11(Hex); K24(Diethyl(H))	HCD	1.32669	1	0	1	1	Heavy		211.772	3.99651e-19	6.64977e-22	0	33.3189	4	750.397	2998.57	1.46137	94.4396
SATVQINVK	Protocadherin-17 OS=Homo sapiens GN=PCDH17 PE=2 SV=2 - [PCD17_HUMAN]	O14917	N-Term(Diethyl); S1(Hex); T3(Hex); K9(Diethyl)	ETciD	0.708326	1	0	1	1	Light	2.14339				0	0.419453	2	698.396	1395.78	0.681893	62.7109
SATVQINVK	Protocadherin-17 OS=Homo sapiens GN=PCDH17 PE=2 SV=2 - [PCD17_HUMAN]	O14917	N-Term(Diethyl(H)); S1(Hex); T3(Hex); K9(Diethyl(H))	HCD	0.705659	1	0	1	1	Heavy		256.957	4.53416e-24	2.01518e-26	0	49.9959	2	702.409	1403.81	0.167275	55.5635
SATVQINVK	Protocadherin-17 OS=Homo sapiens GN=PCDH17 PE=2 SV=2 - [PCD17_HUMAN]	O14917	N-Term(Diethyl(H)); S1(Hex); T3(Hex); K9(Diethyl(H))	HCD	0.708326	1	0	1	1	Heavy		385.919	5.75876e-37	2.55945e-39	0	6.42433	2	702.409	1403.81	0.167275	62.7253
SATVQINVK	Protocadherin-17 OS=Homo sapiens GN=PCDH17 PE=2 SV=2 - [PCD17_HUMAN]	O14917	N-Term(Diethyl(H)); S1(Hex); T3(Hex); K9(Diethyl(H))	HCD	0.699971	1	0	1	1	Heavy		267.873	3.57363e-25	1.6318e-27	0	20.5097	2	702.409	1403.81	0.5151	59.7456
SATVQIN	Protocadherin-17 OS=Homo sapiens GN=PCDH17 PE=2 SV=2 - [PCD17_HUMAN]	O14917	N-Term(Diethyl(H)); S1(Hex); T3(Hex)	HCD	0.921544	1	0	1	1	Heavy		218.294	4.22749e-19	1.48125e-22	0	14.8801	2	558.789	1116.57	-0.0906988	43.1509
SGSSILK	Protocadherin-18 OS=Homo sapiens GN=PCDH18 PE=2 SV=3 - [PCD18_HUMAN]	Q9HCL0	N-Term(Diethyl(H)); S1(Hex); S3(Hex); K7(Diethyl(H))	HCD	1.10553	1	0	1	1	Heavy		240.492	2.41998e-22	8.92981e-25	0	9.58865	2	568.332	1135.66	0.194046	38.5079
ENLQPNSPVGMVTVMDADK	Protocadherin-7 OS=Homo sapiens GN=PCDH7 PE=1 SV=2 - [PCDH7_HUMAN]	O60245	N-Term(Diethyl); M11(Oxidation); T13(Hex); M15(Oxidation); K19(Diethyl)	ETciD	0.729132	1	0	1	1	Light	4.57975				0	1.61897	3	784.384	2351.14	0.753278	76.4266
ENLQPNSPVGMVTVMDADK	Protocadherin-7 OS=Homo sapiens GN=PCDH7 PE=1 SV=2 - [PCDH7_HUMAN]	O60245	N-Term(Diethyl); M11(Oxidation); T13(Hex); M15(Oxidation); K19(Diethyl)	ETciD	0.638716	1	0	1	1	Light	3.48375				0	0.357398	3	784.384	2351.14	0.909037	80.4703
SPVGMVTVMDADK	Protocadherin-7 OS=Homo sapiens GN=PCDH7 PE=1 SV=2 - [PCDH7_HUMAN]	O60245	N-Term(Diethyl); M5(Oxidation); T7(Hex); M9(Oxidation); K13(Diethyl)	ETciD	0.811701	1	0	1	1	Light	2.57002				0	1.06893	2	828.411	1655.81	1.13117	58.3776
ENLQPNSPVGMVTVMDADK	Protocadherin-7 OS=Homo sapiens GN=PCDH7 PE=1 SV=2 - [PCDH7_HUMAN]	O60245	N-Term(Diethyl(H)); M11(Oxidation); T13(Hex); K19(Diethyl(H))	ETciD	0.75788	1	0	1	1	Heavy	2.45225				0	17.012	3	781.729	2343.17	1.48364	87.3176
SPVGMVTVMDADK	Protocadherin-7 OS=Homo sapiens GN=PCDH7 PE=1 SV=2 - [PCDH7_HUMAN]	O60245	N-Term(Diethyl(H)); M5(Oxidation); T7(Hex); M9(Oxidation); K13(Diethyl(H))	ETciD	0.786982	1	0	1	1	Heavy	2.6092				0	3.49604	2	832.424	1663.84	0.621441	63.6803
ENLQPNSPVGMVTVMDADK	Protocadherin-7 OS=Homo sapiens GN=PCDH7 PE=1 SV=2 - [PCDH7_HUMAN]	O60245	N-Term(Diethyl(H)); S7(Hex); M11(Oxidation); M15(Oxidation); K19(Diethyl(H))	HCD	0.729132	1	0	1	1	Heavy		692.712	3.4006e-67	5.35528e-70	0	9.38355	3	787.059	2359.16	0.498557	76.4524
ENLQPNSPVGMVTVMDADK	Protocadherin-7 OS=Homo sapiens GN=PCDH7 PE=1 SV=2 - [PCDH7_HUMAN]	O60245	N-Term(Diethyl(H)); S7(Hex); M11(Oxidation); M15(Oxidation); K19(Diethyl(H))	HCD	0.717146	1	0	1	1	Heavy		317.346	1.22536e-29	1.84264e-32	0	9.83488	2	1180.09	2359.16	0.840586	75.773
ENLQPNSPVGMVTVMDADK	Protocadherin-7 OS=Homo sapiens GN=PCDH7 PE=1 SV=2 - [PCDH7_HUMAN]	O60245	N-Term(Diethyl(H)); S7(Hex); M15(Oxidation); K19(Diethyl(H))	HCD	0.66011	1	0	1	1	Heavy		463.567	2.92054e-44	4.3984e-47	0	23.1595	3	781.728	2343.17	0.311479	86.0764
ENLQPNSPVGMVTVMDADK	Protocadherin-7 OS=Homo sapiens GN=PCDH7 PE=1 SV=2 - [PCDH7_HUMAN]	O60245	N-Term(Diethyl(H)); S7(Hex); M11(Oxidation); K19(Diethyl(H))	HCD	0.75788	1	0	1	1	Heavy		426.5	1.45501e-40	2.23848e-43	0	17.012	3	781.729	2343.17	1.48364	87.326
SATATVSLFVMDENDNAPTVTLPK	Protocadherin-7 OS=Homo sapiens GN=PCDH7 PE=1 SV=2 - [PCDH7_HUMAN]	O60245	S1(Hex); N-Term(Diethyl(H)); S7(Hex); M11(Oxidation); T19(Hex); T21(Hex); K24(Diethyl(H))	HCD	0.666832	1	0	1	1	Heavy		561.748	6.2584e-54	6.68633e-57	0	10.2973	3	1102.54	3305.61	1.09959	102.265
ENLQPNSPVGMVTVMDADK	Protocadherin-7 OS=Homo sapiens GN=PCDH7 PE=1 SV=2 - [PCDH7_HUMAN]	O60245	N-Term(Diethyl(H)); S7(Hex); M11(Oxidation); M15(Oxidation); K19(Diethyl(H))	HCD	0.638716	1	0	1	1	Heavy		756.986	1.28904e-73	2.00162e-76	0	6.10033	3	787.06	2359.16	0.576171	80.4901
ENLQPNSPVGMVTVMDADK	Protocadherin-7 OS=Homo sapiens GN=PCDH7 PE=1 SV=2 - [PCDH7_HUMAN]	O60245	N-Term(Diethyl(H)); S7(Hex); M11(Oxidation); M15(Oxidation); K19(Diethyl(H))	HCD	0.710575	1	0	1	1	Heavy		273.116	3.24052e-25	4.88029e-28	0	0	3	787.06	2359.16	0.7314	78.6102
VTVMDADK	Protocadherin-7 OS=Homo sapiens GN=PCDH7 PE=1 SV=2 - [PCDH7_HUMAN]	O60245	N-Term(Diethyl(H)); T2(Hex); M4(Oxidation); K8(Diethyl(H))	HCD	0.676861	1	0	1	1	Heavy		232.572	2.15467e-20	5.53048e-24	0	4.45767	2	588.818	1176.63	0.897454	38.6593
LLPTATDR	Protocadherin-7 OS=Homo sapiens GN=PCDH7 PE=1 SV=2 - [PCDH7_HUMAN]	O60245	N-Term(Diethyl(H)); T4(Hex)	HCD	1.21652	1	0	1	1	Heavy		256.758	6.97859e-23	2.10961e-26	0	21.0218	2	554.818	1108.63	-0.26166	53.1656
SPVGMVTVMDADK	Protocadherin-7 OS=Homo sapiens GN=PCDH7 PE=1 SV=2 - [PCDH7_HUMAN]	O60245	N-Term(Diethyl(H)); M5(Oxidation); T7(Hex); M9(Oxidation); K13(Diethyl(H))	HCD	0.774886	1	0	1	1	Heavy		580.288	5.94669e-55	9.35897e-59	0	3.26253	2	832.423	1663.84	0.474708	58.3069
ENLQPNSPVGMVTVM	Protocadherin-7 OS=Homo sapiens GN=PCDH7 PE=1 SV=2 - [PCDH7_HUMAN]	O60245	N-Term(Diethyl(H)); S7(Hex); M11(Oxidation); M15(Oxidation)	HCD	0.984135	1	0	1	1	Heavy		396.16	1.68586e-36	2.42082e-40	0	6.45525	2	935.454	1869.9	0.30234	80.6495
LLPTATDR	Protocadherin-7 OS=Homo sapiens GN=PCDH7 PE=1 SV=2 - [PCDH7_HUMAN]	O60245	N-Term(Diethyl(H)); T4(Hex)	HCD	1.24611	1	0	1	1	Heavy		233.785	1.3837e-20	4.18288e-24	0	15.786	2	554.818	1108.63	-0.26166	60.0119
SPVGMVTVMDADK	Protocadherin-7 OS=Homo sapiens GN=PCDH7 PE=1 SV=2 - [PCDH7_HUMAN]	O60245	N-Term(Diethyl(H)); M5(Oxidation); T7(Hex); M9(Oxidation); K13(Diethyl(H))	HCD	0.786982	1	0	1	1	Heavy		414.645	2.21704e-38	3.43196e-42	0	3.49604	2	832.424	1663.84	0.621441	63.6912
ENLQPNSPVGMVTVM	Protocadherin-7 OS=Homo sapiens GN=PCDH7 PE=1 SV=2 - [PCDH7_HUMAN]	O60245	N-Term(Diethyl(H)); S7(Hex); M11(Oxidation); M15(Oxidation)	HCD	1.03943	1	0	1	1	Heavy		228.956	8.88096e-20	1.2718e-23	0	0	2	935.454	1869.9	0.237058	82.3531
IQASDGGSPQLSSSALVQVR	Protocadherin-8 OS=Homo sapiens GN=PCDH8 PE=2 SV=2 - [PCDH8_HUMAN]	O95206	N-Term(Diethyl(H)); S12(Hex); S13(Hex)	HCD	0.713726	1	0	1	1	Heavy		238.365	9.61702e-22	1.45712e-24	0	60.4187	3	795.412	2384.22	-0.060862	77.4535
YSTVGVITVTDADAGENK	Protocadherin-9 OS=Homo sapiens GN=PCDH9 PE=1 SV=2 - [PCDH9_HUMAN]	Q9HC56	N-Term(Diethyl); T3(Hex); T8(Hex); K18(Diethyl)	ETciD	0.617268	1	0	1	1	Light	4.83421				0	12.2371	3	759.381	2276.13	0.0960756	82.4414
YSTVGVITVTDADAGENK	Protocadherin-9 OS=Homo sapiens GN=PCDH9 PE=1 SV=2 - [PCDH9_HUMAN]	Q9HC56	N-Term(Diethyl); T3(Hex); T8(Hex); K18(Diethyl)	ETciD	0.590909	1	0	1	1	Light	3.84891				0	17.0892	3	759.381	2276.13	0.41786	80.8949
YSTVGVITVTDADAGENK	Protocadherin-9 OS=Homo sapiens GN=PCDH9 PE=1 SV=2 - [PCDH9_HUMAN]	Q9HC56	N-Term(Diethyl(H)); T3(Hex); T8(Hex); K18(Diethyl(H))	ETciD	0.58596	1	0	1	1	Heavy	2.47227				0	13.0343	3	762.057	2284.16	0.236116	78.0068
YSTVGVITVTDADAGENK	Protocadherin-9 OS=Homo sapiens GN=PCDH9 PE=1 SV=2 - [PCDH9_HUMAN]	Q9HC56	N-Term(Diethyl(H)); T10(Hex); K18(Diethyl(H))	ETciD	0.547918	1	0	1	1	Heavy	3.48057				0	29.8176	3	708.039	2122.1	-0.480184	83.0081
YSTVGVITVTDADAGENK	Protocadherin-9 OS=Homo sapiens GN=PCDH9 PE=1 SV=2 - [PCDH9_HUMAN]	Q9HC56	N-Term(Diethyl(H)); T10(Hex); K18(Diethyl(H))	ETciD	0.562694	1	0	1	1	Heavy	3.33059				0	13.2143	3	708.039	2122.1	0.46895	88.89
YSTVGVITVTDADAGENK	Protocadherin-9 OS=Homo sapiens GN=PCDH9 PE=1 SV=2 - [PCDH9_HUMAN]	Q9HC56	N-Term(Diethyl(H)); T3(Hex); T8(Hex); K18(Diethyl(H))	HCD	0.593016	1	0	1	1	Heavy		306.944	1.06106e-28	2.02107e-31	0	6.5963	2	1142.58	2284.16	0.108397	77.9782
YSTVGVITVTDADAGENK	Protocadherin-9 OS=Homo sapiens GN=PCDH9 PE=1 SV=2 - [PCDH9_HUMAN]	Q9HC56	N-Term(Diethyl(H)); T3(Hex); T8(Hex); K18(Diethyl(H))	HCD	0.58596	1	0	1	1	Heavy		319.157	8.08596e-30	1.21411e-32	0	13.0343	3	762.057	2284.16	0.236116	78.0169
YSTVGVITVTDADAGENK	Protocadherin-9 OS=Homo sapiens GN=PCDH9 PE=1 SV=2 - [PCDH9_HUMAN]	Q9HC56	N-Term(Diethyl(H)); T8(Hex); K18(Diethyl(H))	HCD	0.547918	1	0	1	1	Heavy		429.999	5.90085e-41	1.00014e-43	0	29.8176	3	708.039	2122.1	-0.480184	83.0202
YSTVGVITVTDADAGENK	Protocadherin-9 OS=Homo sapiens GN=PCDH9 PE=1 SV=2 - [PCDH9_HUMAN]	Q9HC56	N-Term(Diethyl(H)); T3(Hex); K18(Diethyl(H))	HCD	0.539797	1	0	1	1	Heavy		464.664	1.54085e-44	3.41652e-47	0	19.2245	2	1061.55	2122.1	-0.301278	82.9609
YSTVGVITVTDADAGENK	Protocadherin-9 OS=Homo sapiens GN=PCDH9 PE=1 SV=2 - [PCDH9_HUMAN]	Q9HC56	N-Term(Diethyl(H)); T3(Hex); T8(Hex); K18(Diethyl(H))	HCD	0.617268	1	0	1	1	Heavy		451.757	4.39725e-43	6.67261e-46	0	15.9684	3	762.056	2284.15	-0.405191	82.426
YSTVGVITVTDADAGENK	Protocadherin-9 OS=Homo sapiens GN=PCDH9 PE=1 SV=2 - [PCDH9_HUMAN]	Q9HC56	N-Term(Diethyl(H)); T3(Hex); T8(Hex); K18(Diethyl(H))	HCD	0.641347	1	0	1	1	Heavy		511.421	4.79407e-49	7.20913e-52	0	3.29806	2	1142.58	2284.16	0.322166	82.7267
YSTVGVITVTDADAGENK	Protocadherin-9 OS=Homo sapiens GN=PCDH9 PE=1 SV=2 - [PCDH9_HUMAN]	Q9HC56	N-Term(Diethyl(H)); T3(Hex); K18(Diethyl(H))	HCD	0.565284	1	0	1	1	Heavy		296.747	1.21407e-27	2.1151e-30	0	20.8691	2	1061.56	2122.11	1.53947	88.0874
YSTVGVITVTDADAGENK	Protocadherin-9 OS=Homo sapiens GN=PCDH9 PE=1 SV=2 - [PCDH9_HUMAN]	Q9HC56	N-Term(Diethyl(H)); T3(Hex); K18(Diethyl(H))	HCD	0.546293	1	0	1	1	Heavy		431.501	3.01509e-41	7.07767e-44	0	26.8675	2	1061.56	2122.1	0.734141	88.7912
YSTVGVITVTDADAGENK	Protocadherin-9 OS=Homo sapiens GN=PCDH9 PE=1 SV=2 - [PCDH9_HUMAN]	Q9HC56	N-Term(Diethyl(H)); T10(Hex); K18(Diethyl(H))	HCD	0.562694	1	0	1	1	Heavy		338.012	9.10376e-32	1.58051e-34	0	13.2143	3	708.039	2122.1	0.46895	88.9024
YSTVGVITVTDADAGENK	Protocadherin-9 OS=Homo sapiens GN=PCDH9 PE=1 SV=2 - [PCDH9_HUMAN]	Q9HC56	N-Term(Diethyl(H)); T3(Hex); T8(Hex); K18(Diethyl(H))	HCD	0.605613	1	0	1	1	Heavy		489.823	6.96865e-47	1.04165e-49	0	9.17942	2	1142.58	2284.16	0.108397	80.9177
YSTVGVITVTDADAGENK	Protocadherin-9 OS=Homo sapiens GN=PCDH9 PE=1 SV=2 - [PCDH9_HUMAN]	Q9HC56	N-Term(Diethyl(H)); T3(Hex); T8(Hex); K18(Diethyl(H))	HCD	0.590909	1	0	1	1	Heavy		493.832	2.77641e-47	4.13772e-50	0	65.0861	3	762.057	2284.16	0.155952	80.9319
YSTVGVITVTDADAGENK	Protocadherin-9 OS=Homo sapiens GN=PCDH9 PE=1 SV=2 - [PCDH9_HUMAN]	Q9HC56	N-Term(Diethyl(H)); T3(Hex); K18(Diethyl(H))	HCD	0.662139	1	0	1	1	Heavy		217.181	1.13306e-19	1.91396e-22	0	46.3404	3	708.039	2122.1	-0.221329	85.7583
YSTVGVITVTDADAGENK	Protocadherin-9 OS=Homo sapiens GN=PCDH9 PE=1 SV=2 - [PCDH9_HUMAN]	Q9HC56	N-Term(Diethyl(H)); T3(Hex); T8(Hex); K18(Diethyl(H))	HCD	0.52753	1	0	1	1	Heavy		321.818	4.40881e-30	6.58031e-33	0	0	3	762.057	2284.16	0.0757891	82.9764

## Sheet: Exp3
Sequence	Protein Descriptions	Protein Group Accessions	Modifications	Activation Type	Ratio (Heavy/Light)	ΔScore	ΔCn	Rank	Search Engine Rank	Quan Channel	XCorr	Amanda Score	E-Value	P-Value	# Missed Cleavages	Isolation Interference [%]	Charge	m/z [Da]	MH+ [Da]	ΔM [ppm]	RT [min]
ELEEIVQPIISK	78 kDa glucose-regulated protein OS=Homo sapiens GN=HSPA5 PE=1 SV=2 - [GRP78_HUMAN]	P11021	N-Term(Diethyl(H)); S11(Hex); K12(Diethyl(H))	HCD	0.635014	1	0	1	1	Heavy		278.356	5.16929e-26	1.46025e-28	0	10.2132	2	840.501	1679.99	0.376742	99.2116
LNEDAAVGSSVLTLQAR	Cadherin EGF LAG seven-pass G-type receptor 1 OS=Homo sapiens GN=CELSR1 PE=1 SV=1 - [CELR1_HUMAN]	Q9NYQ6	N-Term(Diethyl); S10(Hex)	ETciD	0.740613	1	0	1	1	Light	3.81117				0	36.9196	3	654.685	1962.04	0.420384	84.4123
LNEDAAVGSSVLTLQAR	Cadherin EGF LAG seven-pass G-type receptor 1 OS=Homo sapiens GN=CELSR1 PE=1 SV=1 - [CELR1_HUMAN]	Q9NYQ6	N-Term(Diethyl); S10(Hex)	ETciD	0.897076	1	0	1	1	Light	2.86792				0	44.9971	3	654.685	1962.04	0.420384	84.6773
LNEDAAVGSSVLTLQAR	Cadherin EGF LAG seven-pass G-type receptor 1 OS=Homo sapiens GN=CELSR1 PE=1 SV=1 - [CELR1_HUMAN]	Q9NYQ6	N-Term(Diethyl); S10(Hex)	ETciD	0.70346	1	0	1	1	Light	3.37528				0	35.2825	3	654.685	1962.04	0.607032	84.8377
LNEDAAVGSSVLTLQAR	Cadherin EGF LAG seven-pass G-type receptor 1 OS=Homo sapiens GN=CELSR1 PE=1 SV=1 - [CELR1_HUMAN]	Q9NYQ6	N-Term(Diethyl); S9(Hex)	ETciD	0.736993	1	0	1	1	Light	1.593				0	3.15228	2	981.524	1962.04	0.644993	84.5023
LNEDAAVGSSVLTLQAR	Cadherin EGF LAG seven-pass G-type receptor 1 OS=Homo sapiens GN=CELSR1 PE=1 SV=1 - [CELR1_HUMAN]	Q9NYQ6	N-Term(Diethyl); S10(Hex)	ETciD	0.715333	1	0	1	1	Light	3.63083				0	35.5486	3	654.685	1962.04	0.793679	84.5326
LNEDAAVGSSVLTLQAR	Cadherin EGF LAG seven-pass G-type receptor 1 OS=Homo sapiens GN=CELSR1 PE=1 SV=1 - [CELR1_HUMAN]	Q9NYQ6	N-Term(Diethyl); S10(Hex)	ETciD	0.709784	1	0	1	1	Light	1.6589				0	19.7899	2	981.524	1962.04	0.831641	84.6307
LNEDAAVGSSVLTLQAR	Cadherin EGF LAG seven-pass G-type receptor 1 OS=Homo sapiens GN=CELSR1 PE=1 SV=1 - [CELR1_HUMAN]	Q9NYQ6	N-Term(Diethyl); S10(Hex)	ETciD	0.747949	1	0	1	1	Light	2.13033				0	0	2	981.524	1962.04	0.893857	84.8226
LNEDAAVGSSVLTLQAR	Cadherin EGF LAG seven-pass G-type receptor 1 OS=Homo sapiens GN=CELSR1 PE=1 SV=1 - [CELR1_HUMAN]	Q9NYQ6	N-Term(Diethyl(H)); S10(Hex)	ETciD	0.735277	1	0	1	1	Heavy	1.83797				0	16.6941	2	983.53	1966.05	0.585521	84.4877
LNEDAAVGSSVLTLQAR	Cadherin EGF LAG seven-pass G-type receptor 1 OS=Homo sapiens GN=CELSR1 PE=1 SV=1 - [CELR1_HUMAN]	Q9NYQ6	N-Term(Diethyl(H)); T13(Hex)	HCD	0.735277	1	0	1	1	Heavy		637.612	1.1178e-61	1.73302e-64	0	16.6941	2	983.53	1966.05	0.585521	84.5012
DKGSNAVVHY	Cadherin EGF LAG seven-pass G-type receptor 2 OS=Homo sapiens GN=CELSR2 PE=2 SV=1 - [CELR2_HUMAN]	Q9HCU4	N-Term(Diethyl); K2(Diethyl); S4(Hex)	ETciD	0.469213	1	0	1	1	Light	2.25393				1	5.33596	2	682.359	1363.71	0.514676	43.2575
DKGSNAVVHY	Cadherin EGF LAG seven-pass G-type receptor 2 OS=Homo sapiens GN=CELSR2 PE=2 SV=1 - [CELR2_HUMAN]	Q9HCU4	N-Term(Diethyl(H)); K2(Diethyl(H)); S4(Hex)	ETciD	0.440212	1	0	1	1	Heavy	2.99168				1	9.63718	3	457.917	1371.74	-0.0652936	43.2318
DKGSNAVVHY	Cadherin EGF LAG seven-pass G-type receptor 2 OS=Homo sapiens GN=CELSR2 PE=2 SV=1 - [CELR2_HUMAN]	Q9HCU4	N-Term(Diethyl(H)); K2(Diethyl(H)); S4(Hex)	ETciD	0.467535	1	0	1	1	Heavy	2.41292				1	29.0783	3	457.917	1371.74	0.134933	41.5516
GSNAVVHY	Cadherin EGF LAG seven-pass G-type receptor 2 OS=Homo sapiens GN=CELSR2 PE=2 SV=1 - [CELR2_HUMAN]	Q9HCU4	N-Term(Diethyl(H)); S2(Hex)	HCD	0.629186	1	0	1	1	Heavy		334.479	1.11297e-30	3.56493e-34	0	34.2015	2	534.773	1068.54	0.274281	40.7017
GSNAVVHY	Cadherin EGF LAG seven-pass G-type receptor 2 OS=Homo sapiens GN=CELSR2 PE=2 SV=1 - [CELR2_HUMAN]	Q9HCU4	N-Term(Diethyl(H)); S2(Hex)	HCD	0.658117	1	0	1	1	Heavy		313.457	1.39685e-28	4.51179e-32	0	25.411	2	534.773	1068.54	0.388521	40.3105
LNEDAAVGTSVVTVSAVDR	Cadherin EGF LAG seven-pass G-type receptor 2 OS=Homo sapiens GN=CELSR2 PE=2 SV=1 - [CELR2_HUMAN]	Q9HCU4	N-Term(Diethyl); S10(Hex); S15(Hex)	ETciD	0.743309	1	0	1	1	Light	1.77387				0	33.2248	3	761.72	2283.15	0.131205	76.2097
LNEDAAVGTSVVTVSAVDR	Cadherin EGF LAG seven-pass G-type receptor 2 OS=Homo sapiens GN=CELSR2 PE=2 SV=1 - [CELR2_HUMAN]	Q9HCU4	N-Term(Diethyl); S10(Hex); S15(Hex)	ETciD	0.76143	1	0	1	1	Light	3.52702				0	38.2443	3	761.72	2283.15	0.612397	76.0436
LNEDAAVGTSVVTVSAVDR	Cadherin EGF LAG seven-pass G-type receptor 2 OS=Homo sapiens GN=CELSR2 PE=2 SV=1 - [CELR2_HUMAN]	Q9HCU4	N-Term(Diethyl); S10(Hex); S15(Hex)	ETciD	0.797934	1	0	1	1	Light	1.56844				0	0	2	1142.08	2283.15	0.965814	76.1736
LNEDAAVGTSVVTVSAVDR	Cadherin EGF LAG seven-pass G-type receptor 2 OS=Homo sapiens GN=CELSR2 PE=2 SV=1 - [CELR2_HUMAN]	Q9HCU4	N-Term(Diethyl); S10(Hex); S15(Hex)	ETciD	0.788321	1	0	1	1	Light	2.58581				0	13.6891	2	1142.08	2283.15	1.07275	76.0348
LNEDAAVGTSVVTVSAVDR	Cadherin EGF LAG seven-pass G-type receptor 2 OS=Homo sapiens GN=CELSR2 PE=2 SV=1 - [CELR2_HUMAN]	Q9HCU4	N-Term(Diethyl); S10(Hex); S15(Hex)	ETciD	0.810016	1	0	1	1	Light	2.06025				0	16.9268	2	1142.08	2283.15	1.6074	75.9909
VTASDRDK	Cadherin EGF LAG seven-pass G-type receptor 2 OS=Homo sapiens GN=CELSR2 PE=2 SV=1 - [CELR2_HUMAN]	Q9HCU4	N-Term(Diethyl); T2(Hex); K8(Diethyl)	ETciD	0.676711	1	0	1	1	Light	1.59364				1	0	2	583.32	1165.63	0.562927	16.0711
VTASDRDK	Cadherin EGF LAG seven-pass G-type receptor 2 OS=Homo sapiens GN=CELSR2 PE=2 SV=1 - [CELR2_HUMAN]	Q9HCU4	N-Term(Diethyl); T2(Hex); K8(Diethyl)	ETciD	0.580044	1	0	1	1	Light	1.83667				1	5.24582	2	583.32	1165.63	0.562927	15.2553
VTASDRDK	Cadherin EGF LAG seven-pass G-type receptor 2 OS=Homo sapiens GN=CELSR2 PE=2 SV=1 - [CELR2_HUMAN]	Q9HCU4	N-Term(Diethyl(H)); T2(Hex); K8(Diethyl(H))	ETciD	0.575383	1	0	1	1	Heavy	2.47757				1	16.4767	3	391.891	1173.66	-0.453282	15.2366
VTASDRDK	Cadherin EGF LAG seven-pass G-type receptor 2 OS=Homo sapiens GN=CELSR2 PE=2 SV=1 - [CELR2_HUMAN]	Q9HCU4	N-Term(Diethyl(H)); T2(Hex); K8(Diethyl(H))	HCD	0.575383	1	0	1	1	Heavy		285.216	8.8751e-27	3.00851e-29	1	16.4767	3	391.891	1173.66	-0.453282	15.2479
VTASDRDK	Cadherin EGF LAG seven-pass G-type receptor 2 OS=Homo sapiens GN=CELSR2 PE=2 SV=1 - [CELR2_HUMAN]	Q9HCU4	N-Term(Diethyl(H)); T2(Hex); K8(Diethyl(H))	ETciD	0.539009	1	0	1	1	Heavy	2.38849				1	38.2182	3	391.891	1173.66	-0.0632498	16.1208
VTASDRDK	Cadherin EGF LAG seven-pass G-type receptor 2 OS=Homo sapiens GN=CELSR2 PE=2 SV=1 - [CELR2_HUMAN]	Q9HCU4	N-Term(Diethyl(H)); T2(Hex); K8(Diethyl(H))	ETciD	0.614844	1	0	1	1	Heavy	2.16187				1	43.7424	3	391.891	1173.66	-0.0632498	13.8979
VTASDRDK	Cadherin EGF LAG seven-pass G-type receptor 2 OS=Homo sapiens GN=CELSR2 PE=2 SV=1 - [CELR2_HUMAN]	Q9HCU4	N-Term(Diethyl(H)); T2(Hex); K8(Diethyl(H))	HCD	0.539009	1	0	1	1	Heavy		249.4	3.59373e-23	1.14816e-25	1	38.2182	3	391.891	1173.66	-0.0632498	16.1334
VTASDRDK	Cadherin EGF LAG seven-pass G-type receptor 2 OS=Homo sapiens GN=CELSR2 PE=2 SV=1 - [CELR2_HUMAN]	Q9HCU4	N-Term(Diethyl(H)); T2(Hex); K8(Diethyl(H))	HCD	0.580044	1	0	1	1	Heavy		285.552	9.05112e-27	2.78496e-29	1	25.167	2	587.333	1173.66	0.676266	15.2746
VTASDRDKGSN	Cadherin EGF LAG seven-pass G-type receptor 2 OS=Homo sapiens GN=CELSR2 PE=2 SV=1 - [CELR2_HUMAN]	Q9HCU4	N-Term(Diethyl); T2(Hex); K8(Diethyl); S10(Hex)	ETciD	0.816468	1	0	1	1	Light	2.50713				2	41.236	3	529.265	1585.78	0.313793	15.1255
VTASDRDKGSNAVVHY	Cadherin EGF LAG seven-pass G-type receptor 2 OS=Homo sapiens GN=CELSR2 PE=2 SV=1 - [CELR2_HUMAN]	Q9HCU4	N-Term(Diethyl); T2(Hex); K8(Diethyl); S10(Hex)	ETciD	0.632616	1	0	1	1	Light	4.88718				2	22.1203	3	719.031	2155.08	0.378824	41.0512
VTASDRDKGSNAVVHY	Cadherin EGF LAG seven-pass G-type receptor 2 OS=Homo sapiens GN=CELSR2 PE=2 SV=1 - [CELR2_HUMAN]	Q9HCU4	N-Term(Diethyl); T2(Hex); K8(Diethyl); S10(Hex)	ETciD	0.680253	1	0	1	1	Light	3.89637				2	11.9338	3	719.031	2155.08	0.803647	41.2761
VTASDRDKGSNAVVHY	Cadherin EGF LAG seven-pass G-type receptor 2 OS=Homo sapiens GN=CELSR2 PE=2 SV=1 - [CELR2_HUMAN]	Q9HCU4	N-Term(Diethyl); T2(Hex); K8(Diethyl); S10(Hex)	ETciD	0.590154	1	0	1	1	Light	5.56966				2	31.1979	4	539.525	2155.08	0.910694	41.2427
VTATDPDEGTNAQIMY	Cadherin EGF LAG seven-pass G-type receptor 2 OS=Homo sapiens GN=CELSR2 PE=2 SV=1 - [CELR2_HUMAN]	Q9HCU4	N-Term(Diethyl); T4(Hex); T10(Hex); M15(Oxidation)	ETciD	0.699481	1	0	1	1	Light	2.516				0	41.4917	3	707.981	2121.93	0.608144	70.048
VTATDRDK	Cadherin EGF LAG seven-pass G-type receptor 3 OS=Homo sapiens GN=CELSR3 PE=1 SV=2 - [CELR3_HUMAN]	Q9NYQ7	N-Term(Diethyl(H)); T2(Hex); K8(Diethyl(H))	ETciD	0.646435	1	0	1	1	Heavy	2.08287				1	56.7775	3	396.563	1187.67	-0.00646715	16.2036
TAQEPDTFMEQK	Cadherin-1 OS=Homo sapiens GN=CDH1 PE=1 SV=3 - [CADH1_HUMAN]	P12830	N-Term(Diethyl); T1(Hex); M9(Oxidation); K12(Diethyl)	ETciD	0.339097	1	0	1	1	Light	2.56426				0	0.993618	2	857.909	1714.81	0.439595	49.5619
TAQEPDTFMEQK	Cadherin-1 OS=Homo sapiens GN=CDH1 PE=1 SV=3 - [CADH1_HUMAN]	P12830	N-Term(Diethyl(H)); T1(Hex); M9(Oxidation); K12(Diethyl(H))	ETciD	0.341237	1	0	1	1	Heavy	1.96637				0	17.6077	2	861.922	1722.84	0.871651	48.6833
TAQEPDTFMEQK	Cadherin-1 OS=Homo sapiens GN=CDH1 PE=1 SV=3 - [CADH1_HUMAN]	P12830	N-Term(Diethyl(H)); T1(Hex); M9(Oxidation); K12(Diethyl(H))	HCD	0.341237	1	0	1	1	Heavy		367.817	1.06354e-33	1.65299e-37	0	17.6077	2	861.922	1722.84	0.871651	48.6991
DMGGHMGGLSGTTK	Cadherin-11 OS=Homo sapiens GN=CDH11 PE=1 SV=2 - [CAD11_HUMAN]	P55287	N-Term(Diethyl); S10(Hex); T12(Hex); K14(Diethyl)	ETciD	0.761241	1	0	1	1	Light	2.55553				0	40.0125	3	595.615	1784.83	0.609668	52.8488
DMGGHMGGLSGTTK	Cadherin-11 OS=Homo sapiens GN=CDH11 PE=1 SV=2 - [CAD11_HUMAN]	P55287	N-Term(Diethyl); M6(Oxidation); S10(Hex); T12(Hex); K14(Diethyl)	ETciD	0.736059	1	0	1	1	Light	3.58067				0	31.3808	3	600.947	1800.83	0.547063	39.2801
DMGGHMGGLSGTTK	Cadherin-11 OS=Homo sapiens GN=CDH11 PE=1 SV=2 - [CAD11_HUMAN]	P55287	N-Term(Diethyl); M6(Oxidation); S10(Hex); T12(Hex); K14(Diethyl)	ETciD	0.928721	1	0	1	1	Light	2.15592				0	27.8986	3	600.947	1800.83	0.648742	40.2719
DMGGHMGGLSGTTK	Cadherin-11 OS=Homo sapiens GN=CDH11 PE=1 SV=2 - [CAD11_HUMAN]	P55287	N-Term(Diethyl(H)); M2(Oxidation); S10(Hex); T12(Hex); K14(Diethyl(H))	ETciD	0.743088	1	0	1	1	Heavy	3.58793				0	18.1709	3	603.622	1808.85	0.418217	38.0213
DMGGHMGGLSGTTK	Cadherin-11 OS=Homo sapiens GN=CDH11 PE=1 SV=2 - [CAD11_HUMAN]	P55287	N-Term(Diethyl(H)); M2(Oxidation); S10(Hex); T12(Hex); K14(Diethyl(H))	HCD	0.743088	1	0	1	1	Heavy		561.589	2.04627e-54	6.93652e-57	0	18.1709	3	603.622	1808.85	0.418217	38.0368
DMGGHMGGLSGTTK	Cadherin-11 OS=Homo sapiens GN=CDH11 PE=1 SV=2 - [CAD11_HUMAN]	P55287	N-Term(Diethyl); M2(Oxidation); M6(Oxidation); S10(Hex); T12(Hex); K14(Diethyl)	ETciD	0.732394	1	0	1	1	Light	4.62216				0	11.4714	3	606.278	1816.82	-0.0183567	27.3127
DMGGHMGGLSGTTK	Cadherin-11 OS=Homo sapiens GN=CDH11 PE=1 SV=2 - [CAD11_HUMAN]	P55287	N-Term(Diethyl); M2(Oxidation); M6(Oxidation); S10(Hex); T12(Hex); K14(Diethyl)	ETciD	0.80655	1	0	1	1	Light	2.6453				0	3.50039	2	908.913	1816.82	-0.0109556	27.6414
DMGGHMGGLSGTTK	Cadherin-11 OS=Homo sapiens GN=CDH11 PE=1 SV=2 - [CAD11_HUMAN]	P55287	N-Term(Diethyl); M2(Oxidation); M6(Oxidation); S10(Hex); T12(Hex); K14(Diethyl)	ETciD	0.805353	1	0	1	1	Light	4.23857				0	19.6031	3	606.278	1816.82	0.485561	26.3411
DMGGHMGGLSGTTK	Cadherin-11 OS=Homo sapiens GN=CDH11 PE=1 SV=2 - [CAD11_HUMAN]	P55287	N-Term(Diethyl); M2(Oxidation); M6(Oxidation); S10(Hex); T12(Hex); K14(Diethyl)	ETciD	0.706444	1	0	1	1	Light	4.01883				0	47.8829	3	606.278	1816.82	0.485561	29.6415
DMGGHMGGLSGTTK	Cadherin-11 OS=Homo sapiens GN=CDH11 PE=1 SV=2 - [CAD11_HUMAN]	P55287	N-Term(Diethyl); M2(Oxidation); M6(Oxidation); S10(Hex); T12(Hex); K14(Diethyl)	ETciD	0.776944	1	0	1	1	Light	3.10309				0	15.5151	2	908.914	1816.82	0.526556	27.6918
DMGGHMGGLSGTTK	Cadherin-11 OS=Homo sapiens GN=CDH11 PE=1 SV=2 - [CAD11_HUMAN]	P55287	N-Term(Diethyl); M2(Oxidation); M6(Oxidation); S10(Hex); T12(Hex); K14(Diethyl)	ETciD	0.73628	1	0	1	1	Light	3.91876				0	25.2532	3	606.278	1816.82	0.586344	27.5602
DMGGHMGGLSGTTK	Cadherin-11 OS=Homo sapiens GN=CDH11 PE=1 SV=2 - [CAD11_HUMAN]	P55287	N-Term(Diethyl); M2(Oxidation); M6(Oxidation); S10(Hex); T12(Hex); K14(Diethyl)	ETciD	0.733514	1	0	1	1	Light	4.2256				0	1.1032	3	606.278	1816.82	0.687128	27.6011
DMGGHMGGLSGTTK	Cadherin-11 OS=Homo sapiens GN=CDH11 PE=1 SV=2 - [CAD11_HUMAN]	P55287	N-Term(Diethyl); M2(Oxidation); M6(Oxidation); S10(Hex); T12(Hex); K14(Diethyl)	ETciD	0.743176	1	0	1	1	Light	4.78027				0	6.39735	3	606.278	1816.82	0.787911	28.4996
DMGGHMGGLSGTTK	Cadherin-11 OS=Homo sapiens GN=CDH11 PE=1 SV=2 - [CAD11_HUMAN]	P55287	N-Term(Diethyl); M2(Oxidation); M6(Oxidation); S10(Hex); T12(Hex); K14(Diethyl)	ETciD	0.687807	1	0	1	1	Light	5.21946				0	27.0448	3	606.278	1816.82	0.787911	29.6026
DMGGHMGGLSGTTK	Cadherin-11 OS=Homo sapiens GN=CDH11 PE=1 SV=2 - [CAD11_HUMAN]	P55287	N-Term(Diethyl); M2(Oxidation); M6(Oxidation); S10(Hex); T12(Hex); K14(Diethyl)	ETciD	0.724356	1	0	1	1	Light	4.4546				0	5.88452	3	606.279	1816.82	0.989478	27.6301
DMGGHMGGLSGTTK	Cadherin-11 OS=Homo sapiens GN=CDH11 PE=1 SV=2 - [CAD11_HUMAN]	P55287	N-Term(Diethyl(H)); M2(Oxidation); M6(Oxidation); S10(Hex); T12(Hex); K14(Diethyl(H))	HCD	0.80655	1	0	1	1	Heavy		362.237	1.43378e-34	5.97409e-37	0	8.9353	2	912.927	1824.85	-0.136218	27.6564
DMGGHMGGLSGTTK	Cadherin-11 OS=Homo sapiens GN=CDH11 PE=1 SV=2 - [CAD11_HUMAN]	P55287	N-Term(Diethyl(H)); M2(Oxidation); M6(Oxidation); T12(Hex); T13(Hex); K14(Diethyl(H))	HCD	0.805353	1	0	1	1	Heavy		425.934	6.70817e-41	2.55064e-43	0	42.1387	3	608.954	1824.85	0.257775	26.4347
DMGGHMGGLSGTTK	Cadherin-11 OS=Homo sapiens GN=CDH11 PE=1 SV=2 - [CAD11_HUMAN]	P55287	N-Term(Diethyl(H)); M2(Oxidation); M6(Oxidation); S10(Hex); T12(Hex); K14(Diethyl(H))	HCD	0.733514	1	0	1	1	Heavy		597.701	4.4658e-58	1.69802e-60	0	14.9332	3	608.954	1824.85	0.257775	27.6202
DMGGHMGGLSGTTK	Cadherin-11 OS=Homo sapiens GN=CDH11 PE=1 SV=2 - [CAD11_HUMAN]	P55287	N-Term(Diethyl(H)); M2(Oxidation); M6(Oxidation); S10(Hex); T12(Hex); K14(Diethyl(H))	HCD	0.732394	1	0	1	1	Heavy		398.837	3.43754e-38	1.30705e-40	0	33.1001	3	608.954	1824.85	0.257775	27.328
DMGGHMGGLSGTTK	Cadherin-11 OS=Homo sapiens GN=CDH11 PE=1 SV=2 - [CAD11_HUMAN]	P55287	N-Term(Diethyl(H)); M2(Oxidation); M6(Oxidation); S10(Hex); T12(Hex); K14(Diethyl(H))	HCD	0.743176	1	0	1	1	Heavy		454.237	1.02158e-43	3.76967e-46	0	25.3632	3	608.954	1824.85	0.458455	28.5071
DMGGHMGGLSGTTK	Cadherin-11 OS=Homo sapiens GN=CDH11 PE=1 SV=2 - [CAD11_HUMAN]	P55287	N-Term(Diethyl(H)); M2(Oxidation); M6(Oxidation); S10(Hex); T12(Hex); K14(Diethyl(H))	HCD	0.687807	1	0	1	1	Heavy		297.479	4.84289e-28	1.78705e-30	0	47.2388	3	608.954	1824.85	0.458455	29.6176
DMGGHMGGLSGTTK	Cadherin-11 OS=Homo sapiens GN=CDH11 PE=1 SV=2 - [CAD11_HUMAN]	P55287	N-Term(Diethyl(H)); M2(Oxidation); M6(Oxidation); S10(Hex); T12(Hex); K14(Diethyl(H))	HCD	0.776944	1	0	1	1	Heavy		239.705	2.99692e-22	1.07033e-24	0	24.6957	2	912.927	1824.85	0.666504	27.6899
DMGGHMGGLSGTTK	Cadherin-11 OS=Homo sapiens GN=CDH11 PE=1 SV=2 - [CAD11_HUMAN]	P55287	N-Term(Diethyl(H)); M2(Oxidation); M6(Oxidation); T12(Hex); T13(Hex); K14(Diethyl(H))	HCD	0.724356	1	0	1	1	Heavy		533.877	1.1591e-51	4.09576e-54	0	18.1243	3	608.954	1824.85	0.960155	27.6467
GGHMGGLSGTTK	Cadherin-11 OS=Homo sapiens GN=CDH11 PE=1 SV=2 - [CAD11_HUMAN]	P55287	N-Term(Diethyl); M4(Oxidation); S8(Hex); T10(Hex); K12(Diethyl)	ETciD	0.441902	1	0	1	1	Light	3.23026				0	29.0243	3	518.924	1554.76	0.441317	20.1388
GGHMGGLSGTTK	Cadherin-11 OS=Homo sapiens GN=CDH11 PE=1 SV=2 - [CAD11_HUMAN]	P55287	N-Term(Diethyl(H)); M4(Oxidation); T10(Hex); T11(Hex); K12(Diethyl(H))	HCD	0.441902	1	0	1	1	Heavy		310.888	4.90784e-28	8.14986e-32	0	39.2484	3	521.599	1562.78	-0.175938	20.2228
GHMGGLSGTTK	Cadherin-11 OS=Homo sapiens GN=CDH11 PE=1 SV=2 - [CAD11_HUMAN]	P55287	N-Term(Diethyl); M3(Oxidation); S7(Hex); T9(Hex); K11(Diethyl)	ETciD	0.351701	1	0	1	1	Light	3.44367				0	52.4842	3	499.917	1497.74	0.305891	19.7128
GHMGGLSGTTK	Cadherin-11 OS=Homo sapiens GN=CDH11 PE=1 SV=2 - [CAD11_HUMAN]	P55287	N-Term(Diethyl); M3(Oxidation); S7(Hex); T9(Hex); K11(Diethyl)	ETciD	0.414307	1	0	1	1	Light	3.46373				0	16.6339	3	499.917	1497.74	0.5504	19.2543
GHMGGLSGTTK	Cadherin-11 OS=Homo sapiens GN=CDH11 PE=1 SV=2 - [CAD11_HUMAN]	P55287	N-Term(Diethyl(H)); M3(Oxidation); T9(Hex); T10(Hex); K11(Diethyl(H))	HCD	0.414307	1	0	1	1	Heavy		484.519	1.95369e-45	3.53225e-49	0	21.0553	3	502.592	1505.76	0.152396	19.2952
MGGLSGTTK	Cadherin-11 OS=Homo sapiens GN=CDH11 PE=1 SV=2 - [CAD11_HUMAN]	P55287	N-Term(Diethyl(H)); M1(Oxidation); T7(Hex); T8(Hex); K9(Diethyl(H))	HCD	0.809012	1	0	1	1	Heavy		285.452	1.47573e-25	2.84945e-29	0	22.2045	2	656.345	1311.68	0.205945	25.9748
MGGLSGTTK	Cadherin-11 OS=Homo sapiens GN=CDH11 PE=1 SV=2 - [CAD11_HUMAN]	P55287	N-Term(Diethyl(H)); M1(Oxidation); S5(Hex); T7(Hex); K9(Diethyl(H))	ETciD	0.821322	1	0	1	1	Heavy	1.89429				0	21.9805	2	656.345	1311.68	0.299009	25.7251
MGGLSGTTK	Cadherin-11 OS=Homo sapiens GN=CDH11 PE=1 SV=2 - [CAD11_HUMAN]	P55287	N-Term(Diethyl(H)); M1(Oxidation); S5(Hex); T7(Hex); K9(Diethyl(H))	HCD	0.821322	1	0	1	1	Heavy		355.782	1.36851e-32	2.6409e-36	0	21.9805	2	656.345	1311.68	0.299009	25.7404
MGGLSGTTK	Cadherin-11 OS=Homo sapiens GN=CDH11 PE=1 SV=2 - [CAD11_HUMAN]	P55287	N-Term(Diethyl(H)); M1(Oxidation); T7(Hex); T8(Hex); K9(Diethyl(H))	HCD	0.846376	1	0	1	1	Heavy		299.612	5.68549e-27	1.09336e-30	0	7.6174	2	656.345	1311.68	0.392073	27.4899
MGGLSGTTK	Cadherin-11 OS=Homo sapiens GN=CDH11 PE=1 SV=2 - [CAD11_HUMAN]	P55287	N-Term(Diethyl(H)); M1(Oxidation); T7(Hex); T8(Hex); K9(Diethyl(H))	HCD	0.802808	1	0	1	1	Heavy		271.911	3.34881e-24	6.44002e-28	0	13.8603	2	656.345	1311.68	0.392073	26.7336
MGGLSGTTK	Cadherin-11 OS=Homo sapiens GN=CDH11 PE=1 SV=2 - [CAD11_HUMAN]	P55287	N-Term(Diethyl(H)); M1(Oxidation); S5(Hex); T7(Hex); K9(Diethyl(H))	ETciD	0.81684	1	0	1	1	Heavy	1.88136				0	20.8269	2	656.345	1311.68	0.578201	26.5492
MGGLSGTTK	Cadherin-11 OS=Homo sapiens GN=CDH11 PE=1 SV=2 - [CAD11_HUMAN]	P55287	N-Term(Diethyl(H)); M1(Oxidation); T7(Hex); T8(Hex); K9(Diethyl(H))	HCD	0.81684	1	0	1	1	Heavy		366.787	1.08664e-33	2.09573e-37	0	20.8269	2	656.345	1311.68	0.578201	26.5629
SNVGTSVIQVTASDADDPTYGNSAK	Cadherin-11 OS=Homo sapiens GN=CDH11 PE=1 SV=2 - [CAD11_HUMAN]	P55287	N-Term(Diethyl); S6(Hex); S13(Hex); K25(Diethyl)	ETciD	0.979481	1	0	1	1	Light	2.9336				0	1.39112	3	978.471	2933.4	-0.899771	72.964
SNVGTSVIQVTASDADDPTYGNSAK	Cadherin-11 OS=Homo sapiens GN=CDH11 PE=1 SV=2 - [CAD11_HUMAN]	P55287	N-Term(Diethyl); T5(Hex); T11(Hex); S23(Hex); K25(Diethyl)	ETciD	0.886284	1	0	1	1	Light	1.75012				0	2.6206	3	1032.49	3095.45	-0.763314	70.9743
GIQHPPQSTATVSVTVIDVNENPYFAPNPK	Cadherin-2 OS=Homo sapiens GN=CDH2 PE=1 SV=4 - [CADH2_HUMAN]	P19022	N-Term(Diethyl(H)); T9(Hex); T11(Hex); S13(Hex); K30(Diethyl(H))	ETciD	0.76872	1	0	1	1	Heavy	4.51354				0	35.3698	5	766.194	3826.94	1.04771	94.1447
GIQHPPQSTATVSVTVIDVNENPYFAPNPK	Cadherin-2 OS=Homo sapiens GN=CDH2 PE=1 SV=4 - [CADH2_HUMAN]	P19022	N-Term(Diethyl); T9(Hex); T11(Hex); S13(Hex); T15(Hex); K30(Diethyl)	ETciD	0.961063	1	0	1	1	Light	4.38393				0	27.0879	5	797	3980.97	1.82402	91.3954
GIQHPPQSTATVSVTVIDVNENPYFAPNPK	Cadherin-2 OS=Homo sapiens GN=CDH2 PE=1 SV=4 - [CADH2_HUMAN]	P19022	N-Term(Diethyl); T9(Hex); T11(Hex); S13(Hex); T15(Hex); K30(Diethyl)	ETciD	0.891755	1	0	1	1	Light	5.65926				0	9.26867	4	995.998	3980.97	1.85806	91.5849
GIQHPPQSTATVSVTVIDVNENPYFAPNPK	Cadherin-2 OS=Homo sapiens GN=CDH2 PE=1 SV=4 - [CADH2_HUMAN]	P19022	N-Term(Diethyl); T9(Hex); T11(Hex); S13(Hex); T15(Hex); K30(Diethyl)	ETciD	0.862596	1	0	1	1	Light	4.05509				0	33.7294	4	995.998	3980.97	1.85806	91.6961
LTTFTAQDPDR	Cadherin-2 OS=Homo sapiens GN=CDH2 PE=1 SV=4 - [CADH2_HUMAN]	P19022	N-Term(Diethyl(H)); T5(Hex)	HCD	1.27014	1	0	1	1	Heavy		465.605	1.49257e-43	2.75129e-47	0	25.5636	2	743.877	1486.75	0.375396	58.4088
MLTTFTAQDPDR	Cadherin-2 OS=Homo sapiens GN=CDH2 PE=1 SV=4 - [CADH2_HUMAN]	P19022	N-Term(Diethyl(H)); M1(Oxidation); T6(Hex)	HCD	1.63845	1	0	1	1	Heavy		431.251	3.70163e-40	7.49772e-44	0	24.132	2	817.394	1633.78	0.257953	62.6813
QEEGLHAGTMLTTFTAQD	Cadherin-2 OS=Homo sapiens GN=CDH2 PE=1 SV=4 - [CADH2_HUMAN]	P19022	N-Term(Diethyl(H)); M10(Oxidation); T15(Hex)	ETciD	1.39077	1	0	1	1	Heavy	2.06033				0	11.3311	2	1094.51	2188.02	0.854135	76.4032
QEEGLHAGTMLTTFTAQDPDR	Cadherin-2 OS=Homo sapiens GN=CDH2 PE=1 SV=4 - [CADH2_HUMAN]	P19022	N-Term(Diethyl); T15(Hex)	ETciD	1.1502	1	0	1	1	Light	4.58844				0	39.4975	3	846.068	2536.19	0.627566	84.3017
QEEGLHAGTMLTTFTAQDPDR	Cadherin-2 OS=Homo sapiens GN=CDH2 PE=1 SV=4 - [CADH2_HUMAN]	P19022	N-Term(Diethyl); M10(Oxidation); T15(Hex)	ETciD	1.27653	1	0	1	1	Light	3.69656				0	41.972	3	851.398	2552.18	-1.28208	71.4797
QEEGLHAGTMLTTFTAQDPDRY	Cadherin-2 OS=Homo sapiens GN=CDH2 PE=1 SV=4 - [CADH2_HUMAN]	P19022	N-Term(Diethyl(H)); M10(Oxidation); T15(Hex)	ETciD	1.87617	1	0	1	1	Heavy	3.87946				1	37.0672	3	907.091	2719.26	0.293625	79.8709
QEEGLHAGTMLTTFTAQDPDRY	Cadherin-2 OS=Homo sapiens GN=CDH2 PE=1 SV=4 - [CADH2_HUMAN]	P19022	N-Term(Diethyl(H)); M10(Oxidation); T13(Hex)	HCD	1.87617	1	0	1	1	Heavy		563.13	5.7199e-53	4.86386e-57	1	37.0672	3	907.091	2719.26	0.293625	79.8853
SNISILR	Cadherin-2 OS=Homo sapiens GN=CDH2 PE=1 SV=4 - [CADH2_HUMAN]	P19022	N-Term(Diethyl(H)); S4(Hex)	HCD	0.930357	0	0	1	1	Heavy		240.784	2.36235e-22	8.34751e-25	0	60.5584	2	512.807	1024.61	-0.142667	56.716
SNISILR	Cadherin-2 OS=Homo sapiens GN=CDH2 PE=1 SV=4 - [CADH2_HUMAN]	P19022	N-Term(Diethyl(H)); S4(Hex)	HCD	0.946241	1	0	1	1	Heavy		225.651	8.24745e-21	2.72193e-23	0	34.5924	2	512.807	1024.61	0.333887	55.5231
TAQDPDRYMQQNIR	Cadherin-2 OS=Homo sapiens GN=CDH2 PE=1 SV=4 - [CADH2_HUMAN]	P19022	N-Term(Diethyl); T1(Hex); M9(Oxidation)	ETciD	0.86987	1	0	1	1	Light	4.21794				1	42.3947	3	657.315	1969.93	0.366529	38.1514
TAQDPDRYMQQNIR	Cadherin-2 OS=Homo sapiens GN=CDH2 PE=1 SV=4 - [CADH2_HUMAN]	P19022	N-Term(Diethyl); T1(Hex); M9(Oxidation)	ETciD	0.889846	1	0	1	1	Light	3.98454				1	32.4714	3	657.315	1969.93	0.552429	38.8237
TTFTAQDPDRYMQQNIR	Cadherin-2 OS=Homo sapiens GN=CDH2 PE=1 SV=4 - [CADH2_HUMAN]	P19022	N-Term(Diethyl(H)); T4(Hex); M12(Oxidation)	ETciD	1.34706	1	0	1	1	Heavy	2.68799				1	43.31	3	775.04	2323.11	0.278102	60.8169
TTFTAQDPDRYMQQNIR	Cadherin-2 OS=Homo sapiens GN=CDH2 PE=1 SV=4 - [CADH2_HUMAN]	P19022	N-Term(Diethyl(H)); T2(Hex); M12(Oxidation)	HCD	1.34706	1	0	1	1	Heavy		298.934	1.47591e-26	1.27818e-30	1	43.31	3	775.04	2323.11	0.278102	60.8298
TVTAIDADDPNALNGMLR	Cadherin-2 OS=Homo sapiens GN=CDH2 PE=1 SV=4 - [CADH2_HUMAN]	P19022	N-Term(Diethyl); T3(Hex); M16(Oxidation)	ETciD	1.25703	1	0	1	1	Light	3.27018				0	32.4281	3	707.685	2121.04	1.18915	81.4859
TVTAIDADDPNALNGMLR	Cadherin-2 OS=Homo sapiens GN=CDH2 PE=1 SV=4 - [CADH2_HUMAN]	P19022	N-Term(Diethyl(H)); T1(Hex); M16(Oxidation)	HCD	1.13235	1	0	1	1	Heavy		490.223	1.0903e-45	9.49901e-50	0	11.6827	2	1063.03	2125.05	0.708601	81.5113
TVTAIDADDPNALNGMLR	Cadherin-2 OS=Homo sapiens GN=CDH2 PE=1 SV=4 - [CADH2_HUMAN]	P19022	N-Term(Diethyl(H)); T3(Hex); M16(Oxidation)	ETciD	1.15865	1	0	1	1	Heavy	2.75421				0	22.7343	2	1063.03	2125.05	0.823488	81.3162
TVTAIDADDPNALNGMLR	Cadherin-2 OS=Homo sapiens GN=CDH2 PE=1 SV=4 - [CADH2_HUMAN]	P19022	N-Term(Diethyl(H)); T1(Hex); M16(Oxidation)	HCD	1.15865	1	0	1	1	Heavy		815.61	3.224e-78	2.74781e-82	0	22.7343	2	1063.03	2125.05	0.823488	81.3265
VTVIDVNENPYFAPNPK	Cadherin-2 OS=Homo sapiens GN=CDH2 PE=1 SV=4 - [CADH2_HUMAN]	P19022	N-Term(Diethyl); T2(Hex); K17(Diethyl)	ETciD	1.63167	1	0	1	1	Light	2.59204				0	16.6992	3	731.057	2191.16	0.75171	96.7803
VTVIDVNENPYFAPNPK	Cadherin-2 OS=Homo sapiens GN=CDH2 PE=1 SV=4 - [CADH2_HUMAN]	P19022	N-Term(Diethyl(H)); T2(Hex); K17(Diethyl(H))	HCD	1.63167	1	0	1	1	Heavy		540.909	9.94626e-51	8.11079e-55	0	11.4008	3	733.732	2199.18	0.561726	96.7387
AALNSVIGQVTAR	Cadherin-8 OS=Homo sapiens GN=CDH8 PE=1 SV=2 - [CADH8_HUMAN]	P55286	N-Term(Diethyl(H)); T11(Hex)	ETciD	0.906609	1	0	1	1	Heavy	2.62699				0	23.1489	2	761.437	1521.87	-0.218563	80.375
AALNSVIGQVTAR	Cadherin-8 OS=Homo sapiens GN=CDH8 PE=1 SV=2 - [CADH8_HUMAN]	P55286	N-Term(Diethyl(H)); T11(Hex)	HCD	0.906609	1	0	1	1	Heavy		442.032	3.45627e-41	6.26362e-45	0	23.1489	2	761.437	1521.87	-0.218563	80.3855
DPDITSSPIR	Cadherin-8 OS=Homo sapiens GN=CDH8 PE=1 SV=2 - [CADH8_HUMAN]	P55286	N-Term(Diethyl(H)); T5(Hex)	HCD	1.08815	1	0	1	1	Heavy		229.843	3.25583e-21	1.03689e-23	0	10.8083	2	661.847	1322.69	-0.972782	60.399
GLQTSQDAR	Calreticulin OS=Homo sapiens GN=CALR PE=1 SV=1 - [CALR_HUMAN]	P27797	N-Term(Diethyl(H)); T4(Hex)	ETciD	1.02924	1	0	1	1	Heavy	2.1972				0	42.3464	2	599.311	1197.61	0.220649	25.4949
GLQTSQDAR	Calreticulin OS=Homo sapiens GN=CALR PE=1 SV=1 - [CALR_HUMAN]	P27797	N-Term(Diethyl(H)); T4(Hex)	HCD	1.02924	1	0	1	1	Heavy		289.462	2.54687e-27	1.13194e-29	0	42.3464	2	599.311	1197.61	0.220649	25.5067
SQEGDSISVIGR	Carboxypeptidase D OS=Homo sapiens GN=CPD PE=1 SV=2 - [CBPD_HUMAN]	O75976	N-Term(Diethyl(H)); S8(Hex)	HCD	1093.15	1	0	1	1	Heavy		381.17	2.49799e-36	7.63911e-39	0	12.0753	2	735.38	1469.75	0.821802	55.8509
TSLDPSLEIYK	Coiled-coil domain-containing protein 134 OS=Homo sapiens GN=CCDC134 PE=1 SV=1 - [CC134_HUMAN]	Q9H6E4	N-Term(Diethyl); T1(Hex); K11(Diethyl)	ETciD	0.419745	1	0	1	1	Light	1.63739				0	18.9036	2	770.424	1539.84	0.208165	85.8204
TSLDPSLEIYK	Coiled-coil domain-containing protein 134 OS=Homo sapiens GN=CCDC134 PE=1 SV=1 - [CC134_HUMAN]	Q9H6E4	N-Term(Diethyl(H)); T1(Hex); K11(Diethyl(H))	HCD	0.419745	1	0	1	1	Heavy		248.424	6.26744e-23	1.43749e-25	0	9.19031	2	774.438	1547.87	0.374806	85.8859
TSLDPSLEIYKK	Coiled-coil domain-containing protein 134 OS=Homo sapiens GN=CCDC134 PE=1 SV=1 - [CC134_HUMAN]	Q9H6E4	N-Term(Diethyl); T1(Hex); K11(Diethyl); K12(Diethyl)	ETciD	0.418994	1	0	1	1	Light	2.82608				1	24.5482	3	575.338	1724	0.439162	77.5763
VGTTVGQVCATDKDEPD	Desmocollin-2 OS=Homo sapiens GN=DSC2 PE=1 SV=1 - [DSC2_HUMAN]	Q02487	N-Term(Diethyl(H)); T3(Hex); C9(Carbamidomethyl); K13(Diethyl(H))	ETciD	0.723116	1	0	1	1	Heavy	1.98233				1	23.6538	2	1037.51	2074.01	0.486724	54.5617
VGTTVGQVCATDKDEPDTMHTR	Desmocollin-2 OS=Homo sapiens GN=DSC2 PE=1 SV=1 - [DSC2_HUMAN]	Q02487	N-Term(Diethyl); T4(Hex); C9(Carbamidomethyl); K13(Diethyl)	ETciD	0.587435	1	0	1	1	Light	3.37454				1	5.18583	4	673.826	2692.28	0.226327	52.3465
VGTTVGQVCATDKDEPDTMHTR	Desmocollin-2 OS=Homo sapiens GN=DSC2 PE=1 SV=1 - [DSC2_HUMAN]	Q02487	N-Term(Diethyl); T4(Hex); C9(Carbamidomethyl); K13(Diethyl)	ETciD	0.556717	1	0	1	1	Light	5.31784				1	2.61021	4	673.826	2692.28	0.95178	51.4671
VGTTVGQVCATDKDEPDTMHTR	Desmocollin-2 OS=Homo sapiens GN=DSC2 PE=1 SV=1 - [DSC2_HUMAN]	Q02487	N-Term(Diethyl); T4(Hex); C9(Carbamidomethyl); K13(Diethyl)	ETciD	0.603153	1	0	1	1	Light	4.46049				1	3.36978	3	898.099	2692.28	0.979445	51.5102
VGTTVGQVCATDKDEPDTMHTR	Desmocollin-2 OS=Homo sapiens GN=DSC2 PE=1 SV=1 - [DSC2_HUMAN]	Q02487	N-Term(Diethyl); T3(Hex); C9(Carbamidomethyl); K13(Diethyl); M19(Oxidation)	ETciD	0.571297	1	0	1	1	Light	6.69792				1	26.2973	4	677.825	2708.28	0.299646	45.8871
VGTTVGQVCATDKDEPDTMHTR	Desmocollin-2 OS=Homo sapiens GN=DSC2 PE=1 SV=1 - [DSC2_HUMAN]	Q02487	N-Term(Diethyl); T3(Hex); C9(Carbamidomethyl); K13(Diethyl); M19(Oxidation)	ETciD	0.563215	1	0	1	1	Light	5.97879				1	19.7651	4	677.825	2708.28	0.299646	44.5
VGTTVGQVCATDKDEPDTMHTR	Desmocollin-2 OS=Homo sapiens GN=DSC2 PE=1 SV=1 - [DSC2_HUMAN]	Q02487	N-Term(Diethyl); T3(Hex); C9(Carbamidomethyl); K13(Diethyl); M19(Oxidation)	ETciD	0.578092	1	0	1	1	Light	5.36536				1	27.5592	4	677.825	2708.28	0.389792	44.8885
VGTTVGQVCATDKDEPDTMHTR	Desmocollin-2 OS=Homo sapiens GN=DSC2 PE=1 SV=1 - [DSC2_HUMAN]	Q02487	N-Term(Diethyl); T4(Hex); C9(Carbamidomethyl); K13(Diethyl); M19(Oxidation)	ETciD	0.56367	1	0	1	1	Light	3.76322				1	82.0469	3	903.431	2708.28	0.597585	44.9719
VGTTVGQVCATDKDEPDTMHTR	Desmocollin-2 OS=Homo sapiens GN=DSC2 PE=1 SV=1 - [DSC2_HUMAN]	Q02487	N-Term(Diethyl(H)); T4(Hex); C9(Carbamidomethyl); K13(Diethyl(H)); M19(Oxidation)	ETciD	0.586071	1	0	1	1	Heavy	4.54655				1	9.97701	3	906.106	2716.3	0.039766	44.6214
VGTTVGQVCATDKDEPDTMHTR	Desmocollin-2 OS=Homo sapiens GN=DSC2 PE=1 SV=1 - [DSC2_HUMAN]	Q02487	N-Term(Diethyl(H)); T4(Hex); C9(Carbamidomethyl); K13(Diethyl(H)); M19(Oxidation)	HCD	0.586071	1	0	1	1	Heavy		326.736	1.92958e-30	2.12042e-33	1	9.97701	3	906.106	2716.3	0.039766	44.6334
VGTTVGQVCATDKDEPDTMHTR	Desmocollin-2 OS=Homo sapiens GN=DSC2 PE=1 SV=1 - [DSC2_HUMAN]	Q02487	N-Term(Diethyl(H)); T4(Hex); C9(Carbamidomethyl); K13(Diethyl(H)); M19(Oxidation)	HCD	0.571297	1	0	1	1	Heavy		691.678	6.19088e-67	6.7957e-70	1	22.1981	4	679.831	2716.3	0.214575	45.9572
VGTTVGQVCATDKDEPDTMHTR	Desmocollin-2 OS=Homo sapiens GN=DSC2 PE=1 SV=1 - [DSC2_HUMAN]	Q02487	N-Term(Diethyl(H)); T4(Hex); C9(Carbamidomethyl); K13(Diethyl(H)); M19(Oxidation)	HCD	0.578092	1	0	1	1	Heavy		572.436	5.13618e-55	5.70686e-58	1	25.3457	4	679.831	2716.3	0.484214	44.9047
VTVEDK	Desmocollin-2 OS=Homo sapiens GN=DSC2 PE=1 SV=1 - [DSC2_HUMAN]	Q02487	N-Term(Diethyl(H)); T2(Hex); K6(Diethyl(H))	HCD	0.456075	1	0	1	1	Heavy		244.754	7.56306e-23	3.34649e-25	0	13.409	2	486.789	972.57	-1.61254	31.1644
VTVEDK	Desmocollin-2 OS=Homo sapiens GN=DSC2 PE=1 SV=1 - [DSC2_HUMAN]	Q02487	N-Term(Diethyl(H)); T2(Hex); K6(Diethyl(H))	HCD	0.458473	1	0	1	1	Heavy		259.533	2.00415e-24	1.11342e-26	0	33.2815	2	486.789	972.572	-0.0436244	32.4926
VTVEDKDLVNTANWR	Desmocollin-2 OS=Homo sapiens GN=DSC2 PE=1 SV=1 - [DSC2_HUMAN]	Q02487	N-Term(Diethyl); T2(Hex); K6(Diethyl)	ETciD	0.710853	1	0	1	1	Light	3.44602				1	41.9263	3	678.697	2034.08	-0.10611	82.7414
VTVEDKDLVNTANWR	Desmocollin-2 OS=Homo sapiens GN=DSC2 PE=1 SV=1 - [DSC2_HUMAN]	Q02487	N-Term(Diethyl); T2(Hex); K6(Diethyl)	ETciD	0.642504	1	0	1	1	Light	3.85764				1	0	3	678.697	2034.08	0.0739283	82.0851
VTVEDKDLVNTANWR	Desmocollin-2 OS=Homo sapiens GN=DSC2 PE=1 SV=1 - [DSC2_HUMAN]	Q02487	N-Term(Diethyl); T2(Hex); K6(Diethyl)	ETciD	0.664368	1	0	1	1	Light	4.18291				1	11.0967	3	678.697	2034.08	0.343985	82.1848
VTVEDKDLVNTANWR	Desmocollin-2 OS=Homo sapiens GN=DSC2 PE=1 SV=1 - [DSC2_HUMAN]	Q02487	N-Term(Diethyl); T2(Hex); K6(Diethyl)	ETciD	0.676994	1	0	1	1	Light	4.70706				1	10.0477	3	678.697	2034.08	0.524023	81.4909
VTVEDKDLVNTANWR	Desmocollin-2 OS=Homo sapiens GN=DSC2 PE=1 SV=1 - [DSC2_HUMAN]	Q02487	N-Term(Diethyl); T2(Hex); K6(Diethyl)	ETciD	0.549824	1	0	1	1	Light	3.17075				1	8.26978	3	678.697	2034.08	0.79408	83.8229
VTVEDKDLVNTANWR	Desmocollin-2 OS=Homo sapiens GN=DSC2 PE=1 SV=1 - [DSC2_HUMAN]	Q02487	N-Term(Diethyl); T2(Hex); K6(Diethyl)	ETciD	0.722784	1	0	1	1	Light	1.78671				1	9.87768	2	1017.54	2034.08	0.80069	81.5372
VTVEDKDLVNTANWR	Desmocollin-2 OS=Homo sapiens GN=DSC2 PE=1 SV=1 - [DSC2_HUMAN]	Q02487	N-Term(Diethyl(H)); T2(Hex); K6(Diethyl(H))	ETciD	0.716135	1	0	1	1	Heavy	4.55121				1	17.6682	3	681.372	2042.1	0.0513243	81.8589
VTVEDKDLVNTANWR	Desmocollin-2 OS=Homo sapiens GN=DSC2 PE=1 SV=1 - [DSC2_HUMAN]	Q02487	N-Term(Diethyl(H)); T2(Hex); K6(Diethyl(H))	HCD	0.716135	1	0	1	1	Heavy		571.819	4.63123e-55	6.57845e-58	1	17.6682	3	681.372	2042.1	0.0513243	81.8718
VTVEDKDLVNTANWR	Desmocollin-2 OS=Homo sapiens GN=DSC2 PE=1 SV=1 - [DSC2_HUMAN]	Q02487	N-Term(Diethyl(H)); K6(Diethyl(H)); T11(Hex)	HCD	0.664368	1	0	1	1	Heavy		266.07	1.74025e-24	2.47195e-27	1	26.9745	3	681.372	2042.1	0.0513243	82.2634
VTVEDKDLVNTANWR	Desmocollin-2 OS=Homo sapiens GN=DSC2 PE=1 SV=1 - [DSC2_HUMAN]	Q02487	N-Term(Diethyl(H)); T2(Hex); K6(Diethyl(H))	ETciD	0.679542	1	0	1	1	Heavy	5.58272				1	11.9514	3	681.372	2042.1	0.32032	81.871
VTVEDKDLVNTANWR	Desmocollin-2 OS=Homo sapiens GN=DSC2 PE=1 SV=1 - [DSC2_HUMAN]	Q02487	N-Term(Diethyl(H)); T2(Hex); K6(Diethyl(H))	HCD	0.679542	1	0	1	1	Heavy		640.42	6.29094e-62	9.07784e-65	1	11.9514	3	681.372	2042.1	0.32032	81.8822
VTVEDKDLVNTANWR	Desmocollin-2 OS=Homo sapiens GN=DSC2 PE=1 SV=1 - [DSC2_HUMAN]	Q02487	N-Term(Diethyl(H)); T2(Hex); K6(Diethyl(H))	HCD	0.722784	1	0	1	1	Heavy		489.362	8.02616e-47	1.15818e-49	1	10.232	2	1021.56	2042.1	0.805118	81.5623
VTVEDKDLVNTANWR	Desmocollin-2 OS=Homo sapiens GN=DSC2 PE=1 SV=1 - [DSC2_HUMAN]	Q02487	N-Term(Diethyl(H)); T2(Hex); K6(Diethyl(H))	HCD	0.676994	1	0	1	1	Heavy		702.499	3.72905e-68	5.6245e-71	1	16.3906	3	681.373	2042.1	0.947975	81.5164
ATSITVTGSGSCR	Dystroglycan OS=Homo sapiens GN=DAG1 PE=1 SV=2 - [DAG1_HUMAN]	Q14118	N-Term(Diethyl(H)); S9(Hex); C12(Carbamidomethyl)	HCD	3199.2	1	0	1	1	Heavy		237.748	3.87999e-22	1.67965e-24	0	40.0462	2	759.879	1518.75	0.502249	40.6062
ATSITVTGSGSCR	Dystroglycan OS=Homo sapiens GN=DAG1 PE=1 SV=2 - [DAG1_HUMAN]	Q14118	N-Term(Diethyl(H)); T5(Hex); C12(Carbamidomethyl)	ETciD	237.515	1	0	1	1	Heavy	1.82057				0	27.0444	2	759.879	1518.75	0.582624	41.7575
ATSITVTGSGSCR	Dystroglycan OS=Homo sapiens GN=DAG1 PE=1 SV=2 - [DAG1_HUMAN]	Q14118	N-Term(Diethyl(H)); T5(Hex); C12(Carbamidomethyl)	HCD	606.092	1	0	1	1	Heavy		301.333	1.89061e-28	7.35645e-31	0	27.0444	2	759.879	1518.75	0.582624	41.7714
ATSITVTGSGSCR	Dystroglycan OS=Homo sapiens GN=DAG1 PE=1 SV=2 - [DAG1_HUMAN]	Q14118	N-Term(Diethyl(H)); T7(Hex); C12(Carbamidomethyl)	ETciD	801.209	1	0	1	1	Heavy	2.15333				0	7.53198	2	759.879	1518.75	0.663	42.5321
ATSITVTGSGSCR	Dystroglycan OS=Homo sapiens GN=DAG1 PE=1 SV=2 - [DAG1_HUMAN]	Q14118	N-Term(Diethyl(H)); T7(Hex); C12(Carbamidomethyl)	HCD	2044.53	1	0	1	1	Heavy		491.315	2.30504e-47	7.38796e-50	0	7.53198	2	759.879	1518.75	0.663	42.5444
DPVPGKPTVTIR	Dystroglycan OS=Homo sapiens GN=DAG1 PE=1 SV=2 - [DAG1_HUMAN]	Q14118	N-Term(Diethyl(H)); K6(Diethyl(H)); T8(Hex); T10(Hex)	ETciD	1.87654	1	0	1	1	Heavy	2.35929				0	8.46034	3	575.337	1724	1.12288	60.6488
KPTVTIR	Dystroglycan OS=Homo sapiens GN=DAG1 PE=1 SV=2 - [DAG1_HUMAN]	Q14118	K1(Diethyl(H)); N-Term(Diethyl(H)); T3(Hex); T5(Hex)	HCD	0.697004	1	0	1	1	Heavy		310.387	2.52568e-28	9.1477e-32	0	9.0293	3	420.262	1258.77	-0.499868	30.357
KPTVTIR	Dystroglycan OS=Homo sapiens GN=DAG1 PE=1 SV=2 - [DAG1_HUMAN]	Q14118	K1(Diethyl(H)); N-Term(Diethyl(H)); T3(Hex); T5(Hex)	HCD	0.712006	1	0	1	1	Heavy		263.439	1.32055e-23	4.53019e-27	0	31.8277	3	420.262	1258.77	-0.281673	32.4556
KPTVTIR	Dystroglycan OS=Homo sapiens GN=DAG1 PE=1 SV=2 - [DAG1_HUMAN]	Q14118	K1(Diethyl(H)); N-Term(Diethyl(H)); T3(Hex); T5(Hex)	HCD	0.69457	1	0	1	1	Heavy		287.866	3.99524e-26	1.63471e-29	0	20.9101	3	420.262	1258.77	0.0819862	30.7883
TTTSGVPR	Dystroglycan OS=Homo sapiens GN=DAG1 PE=1 SV=2 - [DAG1_HUMAN]	Q14118	N-Term(Diethyl(H)); S4(Hex)	HCD	1.38045	1	0	1	1	Heavy		228.301	4.28796e-21	1.47861e-23	0	27.3421	2	520.787	1040.57	0.296182	26.74
LAPSEYR	Endoplasmic reticulum resident protein 44 OS=Homo sapiens GN=ERP44 PE=1 SV=1 - [ERP44_HUMAN]	Q9BS26	N-Term(Diethyl(H)); S4(Hex)	HCD	0.784941	1	0	1	1	Heavy		237.375	4.70328e-22	1.83007e-24	0	30.9084	2	529.284	1057.56	0.60047	42.1683
SSQVGLHPEYR	Exostosin-2 OS=Homo sapiens GN=EXT2 PE=1 SV=1 - [EXT2_HUMAN]	Q93063	N-Term(Diethyl); S1(Hex)	ETciD	0.671423	1	0	1	1	Light	2.40703				0	46.9175	3	497.588	1490.75	0.41917	41.4472
AGGTLLTLTGNYLNSGNSR	Hepatocyte growth factor receptor OS=Homo sapiens GN=MET PE=1 SV=4 - [MET_HUMAN]	P08581	N-Term(Diethyl(H)); T7(Hex)	ETciD	191.232	1	0	1	1	Heavy	2.99215				0	0	3	711.04	2131.11	-0.0854233	97.5569
AGGTLLTLTGNYLNSGNSR	Hepatocyte growth factor receptor OS=Homo sapiens GN=MET PE=1 SV=4 - [MET_HUMAN]	P08581	N-Term(Diethyl(H)); T4(Hex)	HCD	487.987	1	0	1	1	Heavy		459.256	1.61598e-42	1.18683e-46	0	0	3	711.04	2131.11	-0.0854233	97.5702
AGGTLLTLTGNYLNSGNSR	Hepatocyte growth factor receptor OS=Homo sapiens GN=MET PE=1 SV=4 - [MET_HUMAN]	P08581	N-Term(Diethyl(H)); T4(Hex)	HCD	1153.76	1	0	1	1	Heavy		281.489	9.27152e-25	7.09809e-29	0	18.3552	2	1066.06	2131.11	0.665529	97.5131
SFISGGSTITGVGK	Hepatocyte growth factor receptor OS=Homo sapiens GN=MET PE=1 SV=4 - [MET_HUMAN]	P08581	N-Term(Diethyl(H)); S7(Hex); K14(Diethyl(H))	ETciD	25365.1	1	0	1	1	Heavy	2.05752				0	46.8657	2	796.953	1592.9	-0.175465	74.6194
SFISGGSTITGVGK	Hepatocyte growth factor receptor OS=Homo sapiens GN=MET PE=1 SV=4 - [MET_HUMAN]	P08581	N-Term(Diethyl(H)); T10(Hex); K14(Diethyl(H))	HCD	64727	1	0	1	1	Heavy		529.58	4.71457e-51	1.10154e-53	0	46.8657	2	796.953	1592.9	-0.175465	74.6345
SFISGGSTITGVGK	Hepatocyte growth factor receptor OS=Homo sapiens GN=MET PE=1 SV=4 - [MET_HUMAN]	P08581	N-Term(Diethyl(H)); T10(Hex); K14(Diethyl(H))	ETciD	58679.1	1	0	1	1	Heavy	2.54045				0	21.1844	2	796.954	1592.9	0.207705	78.4166
SFISGGSTITGVGK	Hepatocyte growth factor receptor OS=Homo sapiens GN=MET PE=1 SV=4 - [MET_HUMAN]	P08581	N-Term(Diethyl(H)); T10(Hex); K14(Diethyl(H))	HCD	100000	1	0	1	1	Heavy		644.995	1.32344e-62	3.16613e-65	0	21.1844	2	796.954	1592.9	0.207705	78.431
SFISGGSTITGVGK	Hepatocyte growth factor receptor OS=Homo sapiens GN=MET PE=1 SV=4 - [MET_HUMAN]	P08581	N-Term(Diethyl(H)); S7(Hex); K14(Diethyl(H))	ETciD	627.509	1	0	1	1	Heavy	1.87575				0	29.1639	2	796.954	1592.9	0.437607	79.294
SFISGGSTITGVGK	Hepatocyte growth factor receptor OS=Homo sapiens GN=MET PE=1 SV=4 - [MET_HUMAN]	P08581	N-Term(Diethyl(H)); T10(Hex); K14(Diethyl(H))	ETciD	11787.3	1	0	1	1	Heavy	2.38638				0	28.5642	2	796.954	1592.9	0.437607	78.3774
SFISGGSTITGVGK	Hepatocyte growth factor receptor OS=Homo sapiens GN=MET PE=1 SV=4 - [MET_HUMAN]	P08581	N-Term(Diethyl(H)); T8(Hex); K14(Diethyl(H))	HCD	1601.28	1	0	1	1	Heavy		388.243	6.12956e-37	1.49867e-39	0	29.1639	2	796.954	1592.9	0.437607	79.3089
SFISGGSTITGVGK	Hepatocyte growth factor receptor OS=Homo sapiens GN=MET PE=1 SV=4 - [MET_HUMAN]	P08581	N-Term(Diethyl(H)); T10(Hex); K14(Diethyl(H))	HCD	30079.1	1	0	1	1	Heavy		602.991	2.05416e-58	5.02241e-61	0	28.5642	2	796.954	1592.9	0.437607	78.3907
SFISGGSTITGVGK	Hepatocyte growth factor receptor OS=Homo sapiens GN=MET PE=1 SV=4 - [MET_HUMAN]	P08581	N-Term(Diethyl(H)); T10(Hex); K14(Diethyl(H))	ETciD	663.856	1	0	1	1	Heavy	2.21875				0	19.3345	2	796.954	1592.9	0.514241	74.7135
SFISGGSTITGVGK	Hepatocyte growth factor receptor OS=Homo sapiens GN=MET PE=1 SV=4 - [MET_HUMAN]	P08581	N-Term(Diethyl(H)); T10(Hex); K14(Diethyl(H))	HCD	1694.04	1	0	1	1	Heavy		675.328	1.19037e-65	2.93196e-68	0	19.3345	2	796.954	1592.9	0.514241	74.7277
SFISGGSTITGVGK	Hepatocyte growth factor receptor OS=Homo sapiens GN=MET PE=1 SV=4 - [MET_HUMAN]	P08581	N-Term(Diethyl(H)); T8(Hex); K14(Diethyl(H))	HCD	1708.14	1	0	1	1	Heavy		323.525	1.78095e-30	4.44127e-33	0	39.7763	2	796.954	1592.9	0.590875	77.9996
SFISGGSTITGVGK	Hepatocyte growth factor receptor OS=Homo sapiens GN=MET PE=1 SV=4 - [MET_HUMAN]	P08581	N-Term(Diethyl(H)); T8(Hex); K14(Diethyl(H))	ETciD	227.36	1	0	1	1	Heavy	1.79079				0	5.49507	2	796.954	1592.9	0.667509	78.8692
SFISGGSTITGVGK	Hepatocyte growth factor receptor OS=Homo sapiens GN=MET PE=1 SV=4 - [MET_HUMAN]	P08581	N-Term(Diethyl(H)); T8(Hex); K14(Diethyl(H))	HCD	580.179	1	0	1	1	Heavy		592.034	2.54186e-57	6.26074e-60	0	5.49507	2	796.954	1592.9	0.667509	78.8831
SFISGGSTITGVGK	Hepatocyte growth factor receptor OS=Homo sapiens GN=MET PE=1 SV=4 - [MET_HUMAN]	P08581	N-Term(Diethyl(H)); T10(Hex); K14(Diethyl(H))	ETciD	14938.5	1	0	1	1	Heavy	2.77009				0	22.973	2	796.954	1592.9	0.744143	78.3482
SFISGGSTITGVGK	Hepatocyte growth factor receptor OS=Homo sapiens GN=MET PE=1 SV=4 - [MET_HUMAN]	P08581	N-Term(Diethyl(H)); T10(Hex); K14(Diethyl(H))	HCD	38120.2	1	0	1	1	Heavy		703.526	1.89138e-68	4.43987e-71	0	22.973	2	796.954	1592.9	0.744143	78.3586
SFISGGSTITGVGK	Hepatocyte growth factor receptor OS=Homo sapiens GN=MET PE=1 SV=4 - [MET_HUMAN]	P08581	N-Term(Diethyl(H)); T10(Hex); K14(Diethyl(H))	ETciD	2062.83	1	0	1	1	Heavy	1.73896				0	24.8799	2	796.954	1592.9	0.820776	74.8032
SFISGGSTITGVGK	Hepatocyte growth factor receptor OS=Homo sapiens GN=MET PE=1 SV=4 - [MET_HUMAN]	P08581	N-Term(Diethyl(H)); T10(Hex); K14(Diethyl(H))	ETciD	17568.7	1	0	1	1	Heavy	2.23163				0	34.492	2	796.954	1592.9	0.820776	78.2172
SFISGGSTITGVGK	Hepatocyte growth factor receptor OS=Homo sapiens GN=MET PE=1 SV=4 - [MET_HUMAN]	P08581	N-Term(Diethyl(H)); T8(Hex); K14(Diethyl(H))	HCD	5263.95	1	0	1	1	Heavy		251.231	3.20821e-23	7.531e-26	0	24.8799	2	796.954	1592.9	0.820776	74.8189
SFISGGSTITGVGK	Hepatocyte growth factor receptor OS=Homo sapiens GN=MET PE=1 SV=4 - [MET_HUMAN]	P08581	N-Term(Diethyl(H)); T10(Hex); K14(Diethyl(H))	HCD	44831.9	1	0	1	1	Heavy		616.568	9.388e-60	2.20376e-62	0	34.492	2	796.954	1592.9	0.820776	78.2307
SFISGGSTITGVGK	Hepatocyte growth factor receptor OS=Homo sapiens GN=MET PE=1 SV=4 - [MET_HUMAN]	P08581	N-Term(Diethyl(H)); T8(Hex); T10(Hex); K14(Diethyl(H))	ETciD	4655.76	1	0	1	1	Heavy	1.77471				0	3.33471	2	877.98	1754.95	0.137456	71.122
SFISGGSTITGVGK	Hepatocyte growth factor receptor OS=Homo sapiens GN=MET PE=1 SV=4 - [MET_HUMAN]	P08581	N-Term(Diethyl(H)); T8(Hex); T10(Hex); K14(Diethyl(H))	HCD	11880.6	1	0	1	1	Heavy		570.871	4.34476e-55	8.18222e-58	0	3.33471	2	877.98	1754.95	0.137456	71.1355
GGSDGYGSGR	Heterogeneous nuclear ribonucleoproteins A2/B1 OS=Homo sapiens GN=HNRNPA2B1 PE=1 SV=2 - [ROA2_HUMAN]	P22626	N-Term(Diethyl(H)); S3(Hex)	ETciD	0.96455	1	0	1	1	Heavy	1.84224				0	18.729	2	567.759	1134.51	0.289044	17.0249
SGNFGGSR	Heterogeneous nuclear ribonucleoproteins A2/B1 OS=Homo sapiens GN=HNRNPA2B1 PE=1 SV=2 - [ROA2_HUMAN]	P22626	N-Term(Diethyl(H)); S7(Hex)	ETciD	0.951871	1	0	1	1	Heavy	2.07229				0	30.6023	2	502.248	1003.49	0.336165	20.6645
SGNFGGSR	Heterogeneous nuclear ribonucleoproteins A2/B1 OS=Homo sapiens GN=HNRNPA2B1 PE=1 SV=2 - [ROA2_HUMAN]	P22626	N-Term(Diethyl(H)); S7(Hex)	HCD	0.951871	1	0	1	1	Heavy		259.553	6.98272e-25	1.10837e-26	0	30.6023	2	502.248	1003.49	0.336165	20.6771
LGNTISSLFGGGTTPDAK	Hypoxia up-regulated protein 1 OS=Homo sapiens GN=HYOU1 PE=1 SV=1 - [HYOU1_HUMAN]	Q9Y4L1	N-Term(Diethyl); T4(Hex); K18(Diethyl)	ETciD	0.700976	1	0	1	1	Light	3.64815				0	25.4976	3	670.693	2010.07	0.651509	91.6009
LGNTISSLFGGGTTPDAK	Hypoxia up-regulated protein 1 OS=Homo sapiens GN=HYOU1 PE=1 SV=1 - [HYOU1_HUMAN]	Q9Y4L1	N-Term(Diethyl); T4(Hex); K18(Diethyl)	ETciD	0.755237	1	0	1	1	Light	2.20368				0	31.7187	2	1005.54	2010.07	0.810022	91.6703
LGNTISSLFGGGTTPDAK	Hypoxia up-regulated protein 1 OS=Homo sapiens GN=HYOU1 PE=1 SV=1 - [HYOU1_HUMAN]	Q9Y4L1	N-Term(Diethyl(H)); T4(Hex); K18(Diethyl(H))	HCD	0.700976	1	0	1	1	Heavy		370.541	6.25019e-35	8.82796e-38	0	21.8476	3	673.369	2018.09	0.172679	91.6228
NVLSLTNK	Integrin beta-1 OS=Homo sapiens GN=ITGB1 PE=1 SV=2 - [ITB1_HUMAN]	P05556	N-Term(Diethyl(H)); T6(Hex); K8(Diethyl(H))	HCD	100000	1	0	1	1	Heavy		275.195	7.95126e-26	3.02329e-28	0	14.2305	2	585.864	1170.72	0.0776715	70.1856
NVLSLTNK	Integrin beta-1 OS=Homo sapiens GN=ITGB1 PE=1 SV=2 - [ITB1_HUMAN]	P05556	N-Term(Diethyl(H)); T6(Hex); K8(Diethyl(H))	ETciD	10190.8	1	0	1	1	Heavy	1.77993				0	50.0304	2	585.864	1170.72	0.28621	70.3256
NVLSLTNK	Integrin beta-1 OS=Homo sapiens GN=ITGB1 PE=1 SV=2 - [ITB1_HUMAN]	P05556	N-Term(Diethyl(H)); T6(Hex); K8(Diethyl(H))	HCD	26005.1	1	0	1	1	Heavy		294.249	9.88766e-28	3.75957e-30	0	50.0304	2	585.864	1170.72	0.28621	70.3389
NVLSLTNK	Integrin beta-1 OS=Homo sapiens GN=ITGB1 PE=1 SV=2 - [ITB1_HUMAN]	P05556	N-Term(Diethyl(H)); T6(Hex); K8(Diethyl(H))	HCD	33356.3	1	0	1	1	Heavy		278.027	4.14285e-26	1.57523e-28	0	30.6874	2	585.864	1170.72	0.494749	70.0017
NVLSLTNK	Integrin beta-1 OS=Homo sapiens GN=ITGB1 PE=1 SV=2 - [ITB1_HUMAN]	P05556	N-Term(Diethyl(H)); T6(Hex); K8(Diethyl(H))	HCD	18507.7	1	0	1	1	Heavy		278.685	3.56029e-26	1.35372e-28	0	50.1915	2	585.864	1170.72	0.494749	70.1887
TIYTFSVPK	Interleukin-28 receptor subunit alpha OS=Homo sapiens GN=IL28RA PE=1 SV=1 - [I28RA_HUMAN]	Q8IU57	N-Term(Diethyl); T1(Hex); K9(Diethyl)	ETciD	0.385263	1	0	1	1	Light	1.76987				0	34.289	2	665.382	1329.76	0.60443	87.484
AGGTCLTLEGQSLSVGTSR	Macrophage-stimulating protein receptor OS=Homo sapiens GN=MST1R PE=1 SV=2 - [RON_HUMAN]	Q04912	N-Term(Diethyl(H)); C5(Carbamidomethyl); T7(Hex)	ETciD	4986.74	1	0	1	1	Heavy	1.86227				0	70.7651	2	1058.54	2116.06	0.531582	80.9316
AGGTCLTLEGQSLSVGTSR	Macrophage-stimulating protein receptor OS=Homo sapiens GN=MST1R PE=1 SV=2 - [RON_HUMAN]	Q04912	N-Term(Diethyl(H)); T4(Hex); C5(Carbamidomethyl)	HCD	12725.2	1	0	1	1	Heavy		538.74	9.4086e-52	1.33645e-54	0	70.7651	2	1058.54	2116.06	0.531582	80.9448
AGGTCLTLEGQSLSVGTSR	Macrophage-stimulating protein receptor OS=Homo sapiens GN=MST1R PE=1 SV=2 - [RON_HUMAN]	Q04912	N-Term(Diethyl(H)); T4(Hex); C5(Carbamidomethyl)	HCD	1712.88	1	0	1	1	Heavy		371.112	4.21147e-35	7.74168e-38	0	0	2	1058.54	2116.06	0.531582	81.0851
AGGTCLTLEGQSLSVGTSR	Macrophage-stimulating protein receptor OS=Homo sapiens GN=MST1R PE=1 SV=2 - [RON_HUMAN]	Q04912	N-Term(Diethyl(H)); T4(Hex); C5(Carbamidomethyl)	ETciD	1359.54	1	0	1	1	Heavy	3.75636				0	12.9866	3	706.026	2116.06	1.1021	80.9697
AGGTCLTLEGQSLSVGTSR	Macrophage-stimulating protein receptor OS=Homo sapiens GN=MST1R PE=1 SV=2 - [RON_HUMAN]	Q04912	N-Term(Diethyl(H)); T4(Hex); C5(Carbamidomethyl)	HCD	3469.3	1	0	1	1	Heavy		452.493	4.1171e-43	5.63214e-46	0	12.9866	3	706.026	2116.06	1.1021	80.9823
DVAATASK	Melanoma inhibitory activity protein 3 OS=Homo sapiens GN=MIA3 PE=1 SV=1 - [MIA3_HUMAN]	Q5JRA6	N-Term(Diethyl(H)); T5(Hex); K8(Diethyl(H))	HCD	0.62473	1	0	1	1	Heavy		298.33	4.42106e-28	1.46879e-30	0	43.2839	2	522.806	1044.6	0.406361	32.1366
TAELNVQVPEEPTHLDQR	Melanoma inhibitory activity protein 3 OS=Homo sapiens GN=MIA3 PE=1 SV=1 - [MIA3_HUMAN]	Q5JRA6	N-Term(Diethyl); T1(Hex)	ETciD	0.817808	1	0	1	1	Light	3.51446				0	36.584	3	765.389	2294.15	0.621453	76.3983
GPVSPSVSFQPLAR	Mitochondrial antiviral-signaling protein OS=Homo sapiens GN=MAVS PE=1 SV=2 - [MAVS_HUMAN]	Q7Z434	N-Term(Diethyl(H)); S8(Hex)	HCD	7420.82	1	0	1	1	Heavy		275.578	1.57789e-25	2.76823e-28	0	4.96945	2	832.458	1663.91	0.313711	81.7441
GPVSPSVSFQPLAR	Mitochondrial antiviral-signaling protein OS=Homo sapiens GN=MAVS PE=1 SV=2 - [MAVS_HUMAN]	Q7Z434	N-Term(Diethyl(H)); S6(Hex)	HCD	776.202	1	0	1	1	Heavy		320.882	4.63553e-30	8.16115e-33	0	1.68059	2	832.459	1663.91	0.680528	82.0041
KVESTKTDSR	Peptidyl-prolyl cis-trans isomerase B OS=Homo sapiens GN=PPIB PE=1 SV=2 - [PPIB_HUMAN]	P23284	N-Term(Diethyl); K1(Diethyl); K6(Diethyl); T7(Hex)	ETciD	1.1738	1	0	1	1	Light	2.67734				2	67.8631	3	494.287	1480.85	0.152471	13.7311
LTITGENLGLR	Plexin-A1 OS=Homo sapiens GN=PLXNA1 PE=1 SV=3 - [PLXA1_HUMAN]	Q9UIW2	N-Term(Diethyl(H)); T2(Hex)	ETciD	71.731	1	0	1	1	Heavy	1.9037				0	16.6636	2	704.908	1408.81	0.168772	86.592
LTITGENLGLR	Plexin-A1 OS=Homo sapiens GN=PLXNA1 PE=1 SV=3 - [PLXA1_HUMAN]	Q9UIW2	N-Term(Diethyl(H)); T2(Hex)	HCD	71.731	1	0	1	1	Heavy		370.584	3.25164e-35	8.74097e-38	0	16.6636	2	704.908	1408.81	0.168772	86.6054
LTITGENLGLR	Plexin-A1 OS=Homo sapiens GN=PLXNA1 PE=1 SV=3 - [PLXA1_HUMAN]	Q9UIW2	N-Term(Diethyl(H)); T2(Hex)	ETciD	60.5505	1	0	1	1	Heavy	1.62229				0	31.5886	2	704.908	1408.81	0.428716	86.2187
LTITGENLGLR	Plexin-A1 OS=Homo sapiens GN=PLXNA1 PE=1 SV=3 - [PLXA1_HUMAN]	Q9UIW2	N-Term(Diethyl(H)); T2(Hex)	ETciD	59.6454	1	0	1	1	Heavy	1.91518				0	50.5691	2	704.908	1408.81	0.428716	86.4841
LTITGENLGLR	Plexin-A1 OS=Homo sapiens GN=PLXNA1 PE=1 SV=3 - [PLXA1_HUMAN]	Q9UIW2	N-Term(Diethyl(H)); T2(Hex)	ETciD	81.4023	1	0	1	1	Heavy	1.79292				0	13.8068	2	704.908	1408.81	0.428716	86.4171
LTITGENLGLR	Plexin-A1 OS=Homo sapiens GN=PLXNA1 PE=1 SV=3 - [PLXA1_HUMAN]	Q9UIW2	N-Term(Diethyl(H)); T2(Hex)	HCD	60.5505	1	0	1	1	Heavy		438.668	4.94617e-42	1.35884e-44	0	31.5886	2	704.908	1408.81	0.428716	86.2314
LTITGENLGLR	Plexin-A1 OS=Homo sapiens GN=PLXNA1 PE=1 SV=3 - [PLXA1_HUMAN]	Q9UIW2	N-Term(Diethyl(H)); T2(Hex)	HCD	59.6454	1	0	1	1	Heavy		381.851	2.37689e-36	6.52993e-39	0	50.5691	2	704.908	1408.81	0.428716	86.5005
LTITGENLGLR	Plexin-A1 OS=Homo sapiens GN=PLXNA1 PE=1 SV=3 - [PLXA1_HUMAN]	Q9UIW2	N-Term(Diethyl(H)); T2(Hex)	HCD	81.4023	1	0	1	1	Heavy		356.812	7.58393e-34	2.0835e-36	0	13.8068	2	704.908	1408.81	0.428716	86.4307
LTITGENLGLR	Plexin-A1 OS=Homo sapiens GN=PLXNA1 PE=1 SV=3 - [PLXA1_HUMAN]	Q9UIW2	N-Term(Diethyl(H)); T2(Hex)	ETciD	66.4094	1	0	1	1	Heavy	1.92116				0	4.59013	2	704.908	1408.81	0.515364	86.6082
LTITGENLGLR	Plexin-A1 OS=Homo sapiens GN=PLXNA1 PE=1 SV=3 - [PLXA1_HUMAN]	Q9UIW2	N-Term(Diethyl(H)); T2(Hex)	HCD	66.4094	1	0	1	1	Heavy		411.527	2.56773e-39	7.03487e-42	0	4.59013	2	704.908	1408.81	0.515364	86.6227
LTITGENLGLR	Plexin-A1 OS=Homo sapiens GN=PLXNA1 PE=1 SV=3 - [PLXA1_HUMAN]	Q9UIW2	N-Term(Diethyl(H)); T2(Hex)	ETciD	183.237	1	0	1	1	Heavy	1.68634				0	12.3285	2	704.908	1408.81	0.602011	87.0196
LTISGSSLDAGSR	Plexin-A3 OS=Homo sapiens GN=PLXNA3 PE=1 SV=2 - [PLXA3_HUMAN]	P51805	N-Term(Diethyl(H)); T2(Hex)	ETciD	42.6689	1	0	1	1	Heavy	1.90435				0	27.6684	2	743.396	1485.78	1.10792	68.8149
LTISGSSLDAGSR	Plexin-A3 OS=Homo sapiens GN=PLXNA3 PE=1 SV=2 - [PLXA3_HUMAN]	P51805	N-Term(Diethyl(H)); T2(Hex)	HCD	42.6689	1	0	1	1	Heavy		537.06	8.34429e-52	1.96799e-54	0	27.6684	2	743.396	1485.78	1.10792	68.834
VTIVGDNLGLLSR	Plexin-A3 OS=Homo sapiens GN=PLXNA3 PE=1 SV=2 - [PLXA3_HUMAN]	P51805	N-Term(Diethyl(H)); T2(Hex)	HCD	188.601	1	0	1	1	Heavy		514.336	1.4592e-49	3.68485e-52	0	4.54023	2	789.961	1578.91	0.337402	98.3241
VTIVGDNLGLLSR	Plexin-A3 OS=Homo sapiens GN=PLXNA3 PE=1 SV=2 - [PLXA3_HUMAN]	P51805	N-Term(Diethyl(H)); T2(Hex)	HCD	13692.6	1	0	1	1	Heavy		347.68	6.32934e-33	1.70602e-35	0	8.03408	2	789.961	1578.91	0.414715	98.5242
LTLNGSK	Plexin-B1 OS=Homo sapiens GN=PLXNB1 PE=1 SV=3 - [PLXB1_HUMAN]	O43157	N-Term(Diethyl(H)); T2(Hex); K7(Diethyl(H))	ETciD	816.943	1	0	1	1	Heavy	1.66015				0	21.6203	2	507.819	1014.63	0.185503	46.6673
ITILGSNLGVQAGDIQR	Plexin-B2 OS=Homo sapiens GN=PLXNB2 PE=1 SV=3 - [PLXB2_HUMAN]	O15031	N-Term(Diethyl(H)); T2(Hex)	ETciD	182.34	1	0	1	1	Heavy	2.93473				0	34.6739	3	659.707	1977.11	0.389293	99.8583
ITILGSNLGVQAGDIQR	Plexin-B2 OS=Homo sapiens GN=PLXNB2 PE=1 SV=3 - [PLXB2_HUMAN]	O15031	N-Term(Diethyl(H)); S6(Hex)	HCD	465.297	1	0	1	1	Heavy		676.899	1.15191e-65	2.0424e-68	0	34.6739	3	659.707	1977.11	0.389293	99.8715
ITILGSNLGVQAGDIQR	Plexin-B2 OS=Homo sapiens GN=PLXNB2 PE=1 SV=3 - [PLXB2_HUMAN]	O15031	N-Term(Diethyl(H)); T2(Hex)	ETciD	6612.7	1	0	1	1	Heavy	2.00237				0	21.6559	2	989.056	1977.11	0.396094	99.6195
ITILGSNLGVQAGDIQR	Plexin-B2 OS=Homo sapiens GN=PLXNB2 PE=1 SV=3 - [PLXB2_HUMAN]	O15031	N-Term(Diethyl(H)); T2(Hex)	HCD	16874.4	1	0	1	1	Heavy		678.032	8.8725e-66	1.57314e-68	0	21.6559	2	989.056	1977.11	0.396094	99.6312
ITILGSNLGVQAGDIQR	Plexin-B2 OS=Homo sapiens GN=PLXNB2 PE=1 SV=3 - [PLXB2_HUMAN]	O15031	N-Term(Diethyl(H)); T2(Hex)	HCD	1351.16	1	0	1	1	Heavy		406.297	1.31604e-38	2.34588e-41	0	15.8652	2	989.057	1977.11	0.457836	99.8041
ITILGSNLGVQAGDIQR	Plexin-B2 OS=Homo sapiens GN=PLXNB2 PE=1 SV=3 - [PLXB2_HUMAN]	O15031	N-Term(Diethyl(H)); T2(Hex)	ETciD	248.513	1	0	1	1	Heavy	4.12529				0	16.3225	3	659.707	1977.11	0.574518	99.4172
ITILGSNLGVQAGDIQR	Plexin-B2 OS=Homo sapiens GN=PLXNB2 PE=1 SV=3 - [PLXB2_HUMAN]	O15031	N-Term(Diethyl(H)); T2(Hex)	HCD	248.513	1	0	1	1	Heavy		754.026	2.20431e-73	3.95747e-76	0	16.3225	3	659.707	1977.11	0.574518	99.4313
ITILGSNLGVQAGDIQR	Plexin-B2 OS=Homo sapiens GN=PLXNB2 PE=1 SV=3 - [PLXB2_HUMAN]	O15031	N-Term(Diethyl(H)); T2(Hex)	ETciD	218.496	1	0	1	1	Heavy	2.11476				0	28.5328	2	989.057	1977.11	0.828287	99.4243
ITILGSNLGVQAGDIQR	Plexin-B2 OS=Homo sapiens GN=PLXNB2 PE=1 SV=3 - [PLXB2_HUMAN]	O15031	N-Term(Diethyl(H)); T2(Hex)	HCD	218.496	1	0	1	1	Heavy		829.757	5.78477e-81	1.05754e-83	0	28.5328	2	989.057	1977.11	0.828287	99.4399
ITILGSNLGVQAGDIQR	Plexin-B2 OS=Homo sapiens GN=PLXNB2 PE=1 SV=3 - [PLXB2_HUMAN]	O15031	N-Term(Diethyl(H)); S6(Hex)	HCD	506.888	1	0	1	1	Heavy		437.913	8.84476e-42	1.61696e-44	0	37.1052	3	659.707	1977.11	0.852357	99.6773
QGPQAGGTTLTIHGTHLDTGSQEDVR	Plexin-B2 OS=Homo sapiens GN=PLXNB2 PE=1 SV=3 - [PLXB2_HUMAN]	O15031	N-Term(Diethyl(H)); T11(Hex)	ETciD	2039.97	1	0	1	1	Heavy	4.72241				0	33.9052	4	725.362	2898.43	0.0852212	61.3691
QGPQAGGTTLTIHGTHLDTGSQEDVR	Plexin-B2 OS=Homo sapiens GN=PLXNB2 PE=1 SV=3 - [PLXB2_HUMAN]	O15031	N-Term(Diethyl(H)); T11(Hex)	HCD	5205.61	1	0	1	1	Heavy		431.422	1.56894e-39	7.20854e-44	0	33.9052	4	725.362	2898.43	0.0852212	61.3828
SVEPQQGPQAGGTTLTIHGTHLDTGSQEDVR	Plexin-B2 OS=Homo sapiens GN=PLXNB2 PE=1 SV=3 - [PLXB2_HUMAN]	O15031	N-Term(Diethyl(H)); T16(Hex)	ETciD	572.115	1	0	1	1	Heavy	3.28679				0	11.9039	4	860.426	3438.68	0.425233	68.4023
TLTETDLYCEPPEVQPPPK	Plexin-B2 OS=Homo sapiens GN=PLXNB2 PE=1 SV=3 - [PLXB2_HUMAN]	O15031	N-Term(Diethyl); T1(Hex); C9(Carbamidomethyl); K19(Diethyl)	ETciD	0.0788107	1	0	1	1	Light	4.19195				0	0.204509	3	830.086	2488.24	1.11267	89.3462
SGPLDGGTLLTIR	Plexin-D1 OS=Homo sapiens GN=PLXND1 PE=1 SV=3 - [PLXD1_HUMAN]	Q9Y4D7	N-Term(Diethyl(H)); T11(Hex)	HCD	201.018	1	0	1	1	Heavy		291.998	3.72023e-26	6.31189e-30	0	29.7857	2	761.431	1521.86	0.0217623	92.8192
SGPLDGGTLLTIR	Plexin-D1 OS=Homo sapiens GN=PLXND1 PE=1 SV=3 - [PLXD1_HUMAN]	Q9Y4D7	N-Term(Diethyl(H)); T11(Hex)	HCD	6737.31	1	0	1	1	Heavy		327.872	9.62157e-30	1.63243e-33	0	21.4314	2	761.431	1521.86	0.0217623	93.098
TITVAGER	Plexin-D1 OS=Homo sapiens GN=PLXND1 PE=1 SV=3 - [PLXD1_HUMAN]	Q9Y4D7	N-Term(Diethyl(H)); T3(Hex)	HCD	55.3571	1	0	1	1	Heavy		231.41	2.53716e-21	7.22837e-24	0	34.8869	2	534.802	1068.6	0.11803	39.7151
TITVAGER	Plexin-D1 OS=Homo sapiens GN=PLXND1 PE=1 SV=3 - [PLXD1_HUMAN]	Q9Y4D7	N-Term(Diethyl(H)); T3(Hex)	HCD	41.0147	1	0	1	1	Heavy		269.704	3.89696e-25	1.07059e-27	0	50.4445	2	534.802	1068.6	0.460733	39.3614
TITVAGER	Plexin-D1 OS=Homo sapiens GN=PLXND1 PE=1 SV=3 - [PLXD1_HUMAN]	Q9Y4D7	N-Term(Diethyl(H)); T3(Hex)	HCD	41.0563	1	0	1	1	Heavy		318.861	4.73109e-30	1.29975e-32	0	35.3543	2	534.803	1068.6	1.0319	41.2714
GVSGYPTLK	Protein disulfide-isomerase A3 OS=Homo sapiens GN=PDIA3 PE=1 SV=4 - [PDIA3_HUMAN]	P30101	N-Term(Diethyl(H)); T7(Hex); K9(Diethyl(H))	HCD	0.599394	1	0	1	1	Heavy		284.041	1.68684e-25	3.94397e-29	0	18.2214	2	602.358	1203.71	0.206648	62.3925
VDCTANTNTCNK	Protein disulfide-isomerase A3 OS=Homo sapiens GN=PDIA3 PE=1 SV=4 - [PDIA3_HUMAN]	P30101	N-Term(Diethyl(H)); C3(Carbamidomethyl); T9(Hex); C10(Carbamidomethyl); K12(Diethyl(H))	ETciD	0.467241	1	0	1	1	Heavy	1.86692				0	34.6223	2	840.395	1679.78	0.0413708	26.7874
VDCTANTNTCNK	Protein disulfide-isomerase A3 OS=Homo sapiens GN=PDIA3 PE=1 SV=4 - [PDIA3_HUMAN]	P30101	N-Term(Diethyl(H)); C3(Carbamidomethyl); T9(Hex); C10(Carbamidomethyl); K12(Diethyl(H))	HCD	0.467241	1	0	1	1	Heavy		577.386	3.72454e-56	1.82575e-58	0	34.6223	2	840.395	1679.78	0.0413708	26.7998
YGVSGYPTLK	Protein disulfide-isomerase A3 OS=Homo sapiens GN=PDIA3 PE=1 SV=4 - [PDIA3_HUMAN]	P30101	N-Term(Diethyl); T8(Hex); K10(Diethyl)	ETciD	0.511219	1	0	1	1	Light	1.52429				0	30.276	2	679.876	1358.75	-0.0724517	75.0207
YGVSGYPTLK	Protein disulfide-isomerase A3 OS=Homo sapiens GN=PDIA3 PE=1 SV=4 - [PDIA3_HUMAN]	P30101	N-Term(Diethyl); S4(Hex); K10(Diethyl)	ETciD	0.512541	1	0	1	1	Light	1.71139				0	3.7317	2	679.876	1358.75	0.0173887	74.7308
YGVSGYPTLK	Protein disulfide-isomerase A3 OS=Homo sapiens GN=PDIA3 PE=1 SV=4 - [PDIA3_HUMAN]	P30101	N-Term(Diethyl); S4(Hex); K10(Diethyl)	ETciD	0.674261	1	0	1	1	Light	2.12863				0	9.02193	2	679.877	1358.75	0.466591	72.1168
YGVSGYPTLK	Protein disulfide-isomerase A3 OS=Homo sapiens GN=PDIA3 PE=1 SV=4 - [PDIA3_HUMAN]	P30101	N-Term(Diethyl); S4(Hex); K10(Diethyl)	ETciD	0.592236	1	0	1	1	Light	2.30591				0	0.0443549	2	679.879	1358.75	3.25163	74.293
YGVSGYPTLK	Protein disulfide-isomerase A3 OS=Homo sapiens GN=PDIA3 PE=1 SV=4 - [PDIA3_HUMAN]	P30101	N-Term(Diethyl(H)); T8(Hex); K10(Diethyl(H))	HCD	0.672768	1	0	1	1	Heavy		226.786	7.58833e-21	2.09622e-23	0	7.53353	2	683.889	1366.77	-1.75766	73.3733
YGVSGYPTLK	Protein disulfide-isomerase A3 OS=Homo sapiens GN=PDIA3 PE=1 SV=4 - [PDIA3_HUMAN]	P30101	N-Term(Diethyl(H)); S4(Hex); K10(Diethyl(H))	ETciD	0.672768	1	0	1	1	Heavy	1.8648				0	7.19292	2	683.889	1366.77	-1.22178	72.6575
YGVSGYPTLK	Protein disulfide-isomerase A3 OS=Homo sapiens GN=PDIA3 PE=1 SV=4 - [PDIA3_HUMAN]	P30101	N-Term(Diethyl(H)); S4(Hex); K10(Diethyl(H))	ETciD	0.615583	1	0	1	1	Heavy	1.84169				0	7.53505	2	683.889	1366.77	-1.22178	73.9878
YGVSGYPTLK	Protein disulfide-isomerase A3 OS=Homo sapiens GN=PDIA3 PE=1 SV=4 - [PDIA3_HUMAN]	P30101	N-Term(Diethyl(H)); S4(Hex); K10(Diethyl(H))	HCD	0.592236	1	0	1	1	Heavy		448.033	6.54285e-43	1.5728e-45	0	8.05759	2	683.889	1366.77	-0.864525	73.8125
YGVSGYPTLK	Protein disulfide-isomerase A3 OS=Homo sapiens GN=PDIA3 PE=1 SV=4 - [PDIA3_HUMAN]	P30101	N-Term(Diethyl(H)); T8(Hex); K10(Diethyl(H))	HCD	0.615583	1	0	1	1	Heavy		340.138	3.90373e-32	9.68669e-35	0	24.9983	2	683.889	1366.77	-0.41796	73.2845
YGVSGYPTLK	Protein disulfide-isomerase A3 OS=Homo sapiens GN=PDIA3 PE=1 SV=4 - [PDIA3_HUMAN]	P30101	N-Term(Diethyl(H)); T8(Hex); K10(Diethyl(H))	HCD	0.600993	1	0	1	1	Heavy		331.963	2.52647e-31	6.36392e-34	0	8.31187	2	683.89	1366.77	-0.328647	74.271
YGVSGYPTLK	Protein disulfide-isomerase A3 OS=Homo sapiens GN=PDIA3 PE=1 SV=4 - [PDIA3_HUMAN]	P30101	N-Term(Diethyl(H)); S4(Hex); K10(Diethyl(H))	ETciD	0.654475	1	0	1	1	Heavy	2.18433				0	20.7075	2	683.89	1366.77	0.0286043	73.0626
YGVSGYPTLK	Protein disulfide-isomerase A3 OS=Homo sapiens GN=PDIA3 PE=1 SV=4 - [PDIA3_HUMAN]	P30101	N-Term(Diethyl(H)); T8(Hex); K10(Diethyl(H))	HCD	0.674261	1	0	1	1	Heavy		387.879	6.29098e-37	1.62979e-39	0	27.5547	2	683.89	1366.77	0.0286043	72.2818
YGVSGYPTLK	Protein disulfide-isomerase A3 OS=Homo sapiens GN=PDIA3 PE=1 SV=4 - [PDIA3_HUMAN]	P30101	N-Term(Diethyl(H)); T8(Hex); K10(Diethyl(H))	HCD	0.654475	1	0	1	1	Heavy		346.498	8.64634e-33	2.23999e-35	0	20.7075	2	683.89	1366.77	0.0286043	73.0768
YGVSGYPTLK	Protein disulfide-isomerase A3 OS=Homo sapiens GN=PDIA3 PE=1 SV=4 - [PDIA3_HUMAN]	P30101	N-Term(Diethyl(H)); S4(Hex); K10(Diethyl(H))	ETciD	0.666419	1	0	1	1	Heavy	1.97235				0	15.641	2	683.89	1366.77	0.117917	74.3356
YGVSGYPTLK	Protein disulfide-isomerase A3 OS=Homo sapiens GN=PDIA3 PE=1 SV=4 - [PDIA3_HUMAN]	P30101	N-Term(Diethyl(H)); S4(Hex); K10(Diethyl(H))	HCD	0.666419	1	0	1	1	Heavy		405.543	1.0773e-38	2.79094e-41	0	15.641	2	683.89	1366.77	0.117917	74.3482
YGVSGYPTLK	Protein disulfide-isomerase A3 OS=Homo sapiens GN=PDIA3 PE=1 SV=4 - [PDIA3_HUMAN]	P30101	N-Term(Diethyl(H)); T8(Hex); K10(Diethyl(H))	HCD	0.512541	1	0	1	1	Heavy		290.269	3.6278e-27	9.39846e-30	0	36.5302	2	683.89	1366.77	0.117917	74.7862
YGVSGYPTLK	Protein disulfide-isomerase A3 OS=Homo sapiens GN=PDIA3 PE=1 SV=4 - [PDIA3_HUMAN]	P30101	N-Term(Diethyl(H)); T8(Hex); K10(Diethyl(H))	ETciD	0.703315	1	0	1	1	Heavy	2.07286				0	14.2998	2	683.89	1366.77	0.20723	71.2352
YGVSGYPTLK	Protein disulfide-isomerase A3 OS=Homo sapiens GN=PDIA3 PE=1 SV=4 - [PDIA3_HUMAN]	P30101	N-Term(Diethyl(H)); S4(Hex); K10(Diethyl(H))	ETciD	0.600993	1	0	1	1	Heavy	1.74129				0	15.4776	2	683.89	1366.77	0.20723	73.5264
YGVSGYPTLK	Protein disulfide-isomerase A3 OS=Homo sapiens GN=PDIA3 PE=1 SV=4 - [PDIA3_HUMAN]	P30101	N-Term(Diethyl(H)); T8(Hex); K10(Diethyl(H))	HCD	0.703315	1	0	1	1	Heavy		380.198	3.67833e-36	9.55411e-39	0	14.2998	2	683.89	1366.77	0.20723	71.2459
YGVSGYPTLK	Protein disulfide-isomerase A3 OS=Homo sapiens GN=PDIA3 PE=1 SV=4 - [PDIA3_HUMAN]	P30101	N-Term(Diethyl(H)); T8(Hex); K10(Diethyl(H))	HCD	0.648439	1	0	1	1	Heavy		320.672	3.29816e-30	8.56664e-33	0	31.6073	2	683.89	1366.77	0.385856	72.6311
YGVSGYPTLK	Protein disulfide-isomerase A3 OS=Homo sapiens GN=PDIA3 PE=1 SV=4 - [PDIA3_HUMAN]	P30101	N-Term(Diethyl(H)); S4(Hex); K10(Diethyl(H))	ETciD	0.648439	1	0	1	1	Heavy	1.7261				0	13.3594	2	683.89	1366.77	0.475168	73.3633
ETLNSIWNVEDHINPK	Protein O-mannosyl-transferase 2 OS=Homo sapiens GN=POMT2 PE=1 SV=2 - [POMT2_HUMAN]	Q9UKY4	N-Term(Diethyl); S5(Hex); K16(Diethyl)	ETciD	0.480422	1	0	1	1	Light	3.09992				0	32.5811	3	728.38	2183.12	0.571413	93.3005
ETLNSIWNVEDHINPK	Protein O-mannosyl-transferase 2 OS=Homo sapiens GN=POMT2 PE=1 SV=2 - [POMT2_HUMAN]	Q9UKY4	N-Term(Diethyl(H)); T2(Hex); K16(Diethyl(H))	HCD	0.480422	1	0	1	1	Heavy		679.205	1.00512e-65	1.20086e-68	0	18.4532	3	731.055	2191.15	0.882787	93.3478
SGTAQISVR	Protocadherin alpha-C2 OS=Homo sapiens GN=PCDHAC2 PE=2 SV=1 - [PCDC2_HUMAN]	Q9Y5I4	N-Term(Diethyl(H)); S1(Hex); T3(Hex)	HCD	1.13194	1	0	1	1	Heavy		281.377	2.49776e-26	7.2821e-29	0	25.5558	2	651.845	1302.68	0.206708	32.7054
SVSATDRDSGTNAQVTY	Protocadherin beta-13 OS=Homo sapiens GN=PCDHB13 PE=2 SV=1 - [PCDBD_HUMAN]	Q9Y5F0	N-Term(Diethyl(H)); S3(Hex); S9(Hex)	ETciD	2.03987	1	0	1	1	Heavy	2.78175				1	6.55055	2	1078.5	2155.99	1.12083	51.3759
SGTALVR	Protocadherin beta-2 OS=Homo sapiens GN=PCDHB2 PE=1 SV=1 - [PCDB2_HUMAN]	Q9Y5E7	N-Term(Diethyl(H)); S1(Hex); T3(Hex)	HCD	1.21497	1	0	1	1	Heavy		272.229	1.55634e-25	5.98594e-28	0	10.4404	2	544.299	1087.59	0.278692	25.5531
ENNSPALHIGSVSATDRDSGTNAQVTY	Protocadherin beta-2 OS=Homo sapiens GN=PCDHB2 PE=1 SV=1 - [PCDB2_HUMAN]|Protocadherin beta-4 OS=Homo sapiens GN=PCDHB4 PE=2 SV=1 - [PCDB4_HUMAN]	Q9Y5E7;Q9Y5E5	N-Term(Diethyl(H)); S13(Hex); S19(Hex)	ETciD	1.90715	1	0	1	1	Heavy	2.68416				1	0	3	1063.5	3188.49	-0.605012	72.7952
GSPALSSEALVR	Protocadherin beta-2 OS=Homo sapiens GN=PCDHB2 PE=1 SV=1 - [PCDB2_HUMAN]|Protocadherin beta-4 OS=Homo sapiens GN=PCDHB4 PE=2 SV=1 - [PCDB4_HUMAN]	Q9Y5E7;Q9Y5E5	N-Term(Diethyl(H)); S6(Hex)	HCD	1.36832	1	0	1	1	Heavy		394.349	1.37777e-37	3.67406e-40	0	17.0379	2	704.89	1408.77	0.43089	62.7066
SGTVMVR	Protocadherin beta-4 OS=Homo sapiens GN=PCDHB4 PE=2 SV=1 - [PCDB4_HUMAN]	Q9Y5E5	N-Term(Diethyl(H)); S1(Hex); T3(Hex); M5(Oxidation)	ETciD	1.58962	1	0	1	1	Heavy	1.7464				0	9.85798	2	575.291	1149.57	0.17576	19.545
DVSVVQIEAFDPDSSSNDK	Protocadherin Fat 1 OS=Homo sapiens GN=FAT1 PE=1 SV=2 - [FAT1_HUMAN]	Q14517	N-Term(Diethyl(H)); S3(Hex); K19(Diethyl(H))	HCD	0.942813	1	0	1	1	Heavy		267.217	1.37215e-24	1.89786e-27	0	22.4018	2	1167.58	2334.14	-0.642151	103.144
DVSVVQIEAFDPDSSSNDK	Protocadherin Fat 1 OS=Homo sapiens GN=FAT1 PE=1 SV=2 - [FAT1_HUMAN]	Q14517	N-Term(Diethyl(H)); S3(Hex); K19(Diethyl(H))	HCD	0.904078	1	0	1	1	Heavy		383.985	2.88425e-36	3.9948e-39	0	67.9766	3	778.72	2334.14	-0.543316	103.09
DVSVVQIEAFDPDSSSNDK	Protocadherin Fat 1 OS=Homo sapiens GN=FAT1 PE=1 SV=2 - [FAT1_HUMAN]	Q14517	N-Term(Diethyl(H)); S3(Hex); K19(Diethyl(H))	HCD	0.944094	1	0	1	1	Heavy		346.885	1.43014e-32	2.04891e-35	0	40.8752	3	778.72	2334.15	0.398041	103.156
DVSVVQIEAFDPDSSSNDK	Protocadherin Fat 1 OS=Homo sapiens GN=FAT1 PE=1 SV=2 - [FAT1_HUMAN]	Q14517	N-Term(Diethyl(H)); S3(Hex); K19(Diethyl(H))	ETciD	0.939354	1	0	1	1	Heavy	2.08258				0	23.4813	3	778.72	2334.15	0.476488	103.051
DVSVVQIEAFDPDSSSNDK	Protocadherin Fat 1 OS=Homo sapiens GN=FAT1 PE=1 SV=2 - [FAT1_HUMAN]	Q14517	N-Term(Diethyl(H)); S3(Hex); K19(Diethyl(H))	HCD	0.939354	1	0	1	1	Heavy		399.01	8.83031e-38	1.25609e-40	0	23.4813	3	778.72	2334.15	0.476488	103.061
GTSVVK	Protocadherin Fat 1 OS=Homo sapiens GN=FAT1 PE=1 SV=2 - [FAT1_HUMAN]	Q14517	N-Term(Diethyl(H)); S3(Hex); K6(Diethyl(H))	HCD	0.895554	1	0	1	1	Heavy		240.149	2.33851e-22	9.66328e-25	0	31.8469	2	436.781	872.556	-0.191099	22.1362
GTSVVK	Protocadherin Fat 1 OS=Homo sapiens GN=FAT1 PE=1 SV=2 - [FAT1_HUMAN]	Q14517	N-Term(Diethyl(H)); S3(Hex); K6(Diethyl(H))	HCD	0.829635	1	0	1	1	Heavy		227.183	4.6296e-21	1.91306e-23	0	63.7048	2	436.781	872.556	-0.121149	20.9728
GTSVVK	Protocadherin Fat 1 OS=Homo sapiens GN=FAT1 PE=1 SV=2 - [FAT1_HUMAN]	Q14517	N-Term(Diethyl(H)); S3(Hex); K6(Diethyl(H))	HCD	0.839365	1	0	1	1	Heavy		242.059	1.50622e-22	6.22404e-25	0	29.7553	2	436.781	872.556	0.018751	21.7876
TVSAHDEDAR	Protocadherin Fat 1 OS=Homo sapiens GN=FAT1 PE=1 SV=2 - [FAT1_HUMAN]	Q14517	N-Term(Diethyl); S3(Hex)	ETciD	1.00242	1	0	1	1	Light	2.45935				0	45.3764	3	440.209	1318.61	0.247326	18.3253
TVSAHDEDAR	Protocadherin Fat 1 OS=Homo sapiens GN=FAT1 PE=1 SV=2 - [FAT1_HUMAN]	Q14517	N-Term(Diethyl(H)); T1(Hex)	HCD	1.08202	1	0	1	1	Heavy		303.976	1.04725e-27	4.00325e-31	0	66.0878	3	441.547	1322.63	0.16013	18.5774
VSATDADIGTNGEFYYSFK	Protocadherin Fat 1 OS=Homo sapiens GN=FAT1 PE=1 SV=2 - [FAT1_HUMAN]	Q14517	N-Term(Diethyl); T10(Hex); K19(Diethyl)	ETciD	0.81327	1	0	1	1	Light	2.65911				0	14.4738	3	787.047	2359.13	1.06142	101.246
VSATDADIGTNGEFYYSFK	Protocadherin Fat 1 OS=Homo sapiens GN=FAT1 PE=1 SV=2 - [FAT1_HUMAN]	Q14517	N-Term(Diethyl(H)); S17(Hex); K19(Diethyl(H))	HCD	0.81327	1	0	1	1	Heavy		494.558	2.65702e-47	3.50069e-50	0	27.6186	3	789.722	2367.15	0.729163	101.22
VSATDADIGTNGEFYYSFK	Protocadherin Fat 1 OS=Homo sapiens GN=FAT1 PE=1 SV=2 - [FAT1_HUMAN]	Q14517	N-Term(Diethyl(H)); T10(Hex); K19(Diethyl(H))	HCD	0.837851	1	0	1	1	Heavy		343.687	3.09358e-32	4.27881e-35	0	8.01967	2	1184.08	2367.15	1.35366	101.244
VSATDADIGTNGEFYYSFK	Protocadherin Fat 1 OS=Homo sapiens GN=FAT1 PE=1 SV=2 - [FAT1_HUMAN]	Q14517	N-Term(Diethyl); T4(Hex); T10(Hex); K19(Diethyl)	ETciD	0.66582	1	0	1	1	Light	3.12135				0	1.06646	3	841.064	2521.18	0.231379	98.6949
VSATDADIGTNGEFYYSFK	Protocadherin Fat 1 OS=Homo sapiens GN=FAT1 PE=1 SV=2 - [FAT1_HUMAN]	Q14517	N-Term(Diethyl); T4(Hex); T10(Hex); K19(Diethyl)	ETciD	0.710154	1	0	1	1	Light	1.56543				0	12.0836	2	1261.09	2521.18	1.42295	98.6643
VSATDADIGTNGEFYYSFK	Protocadherin Fat 1 OS=Homo sapiens GN=FAT1 PE=1 SV=2 - [FAT1_HUMAN]	Q14517	N-Term(Diethyl(H)); T4(Hex); T10(Hex); K19(Diethyl(H))	HCD	0.66582	1	0	1	1	Heavy		467.974	1.12877e-44	1.59431e-47	0	6.36878	3	843.739	2529.2	0.429818	98.8035
VSATDADIGTNGEFYYSFK	Protocadherin Fat 1 OS=Homo sapiens GN=FAT1 PE=1 SV=2 - [FAT1_HUMAN]	Q14517	N-Term(Diethyl(H)); T4(Hex); T10(Hex); K19(Diethyl(H))	ETciD	0.652149	1	0	1	1	Heavy	3.55728				0	6.64727	3	843.739	2529.2	0.502215	98.619
VSATDADIGTNGEFYYSFK	Protocadherin Fat 1 OS=Homo sapiens GN=FAT1 PE=1 SV=2 - [FAT1_HUMAN]	Q14517	N-Term(Diethyl(H)); T4(Hex); S17(Hex); K19(Diethyl(H))	HCD	0.652149	1	0	1	1	Heavy		548.203	1.07993e-52	1.5125e-55	0	6.64727	3	843.739	2529.2	0.502215	98.63
VSATDADIGTNGEFYYSFK	Protocadherin Fat 1 OS=Homo sapiens GN=FAT1 PE=1 SV=2 - [FAT1_HUMAN]	Q14517	N-Term(Diethyl(H)); T10(Hex); S17(Hex); K19(Diethyl(H))	HCD	0.710154	1	0	1	1	Heavy		275.849	1.38889e-25	2.60092e-28	0	21.315	2	1265.11	2529.21	1.13497	98.6849
VSATDADIGTNGEFYYSFK	Protocadherin Fat 1 OS=Homo sapiens GN=FAT1 PE=1 SV=2 - [FAT1_HUMAN]	Q14517	N-Term(Diethyl(H)); T10(Hex); S17(Hex); K19(Diethyl(H))	HCD	0.720294	1	0	1	1	Heavy		400.176	6.82827e-38	9.60375e-41	0	13.4786	2	1265.11	2529.21	1.32802	98.6256
YVTAVDR	Protocadherin Fat 1 OS=Homo sapiens GN=FAT1 PE=1 SV=2 - [FAT1_HUMAN]	Q14517	N-Term(Diethyl); T3(Hex)	ETciD	0.756174	1	0	1	1	Light	1.65511				0	67.0667	2	521.277	1041.55	0.602276	33.5702
YVTAVDR	Protocadherin Fat 1 OS=Homo sapiens GN=FAT1 PE=1 SV=2 - [FAT1_HUMAN]	Q14517	N-Term(Diethyl(H)); T3(Hex)	HCD	0.695099	1	0	1	1	Heavy		279.717	2.34796e-26	1.06726e-28	0	18.8518	2	523.284	1045.56	0.0236061	34.1416
YVTAVDR	Protocadherin Fat 1 OS=Homo sapiens GN=FAT1 PE=1 SV=2 - [FAT1_HUMAN]	Q14517	N-Term(Diethyl(H)); T3(Hex)	HCD	0.709554	1	0	1	1	Heavy		292.456	1.28953e-27	5.68077e-30	0	24.3627	2	523.284	1045.56	0.257108	33.988
YVTAVDR	Protocadherin Fat 1 OS=Homo sapiens GN=FAT1 PE=1 SV=2 - [FAT1_HUMAN]	Q14517	N-Term(Diethyl(H)); T3(Hex)	ETciD	0.797762	1	0	1	1	Heavy	1.81753				0	36.7861	2	523.284	1045.56	0.49061	33.7702
YVTAVDR	Protocadherin Fat 1 OS=Homo sapiens GN=FAT1 PE=1 SV=2 - [FAT1_HUMAN]	Q14517	N-Term(Diethyl(H)); T3(Hex)	HCD	0.797762	1	0	1	1	Heavy		265.624	6.327e-25	2.73896e-27	0	36.7861	2	523.284	1045.56	0.49061	33.7827
YVTAVDR	Protocadherin Fat 1 OS=Homo sapiens GN=FAT1 PE=1 SV=2 - [FAT1_HUMAN]	Q14517	N-Term(Diethyl(H)); T3(Hex)	HCD	0.756174	1	0	1	1	Heavy		291.382	1.68021e-27	7.27365e-30	0	21.0916	2	523.284	1045.56	0.607362	33.6451
YVTAVDRDSGR	Protocadherin Fat 1 OS=Homo sapiens GN=FAT1 PE=1 SV=2 - [FAT1_HUMAN]	Q14517	N-Term(Diethyl(H)); T3(Hex)	ETciD	1.3342	1	0	1	1	Heavy	2.58231				1	58.4481	3	487.585	1460.74	-0.0902028	30.4533
YVTAVDRDSGR	Protocadherin Fat 1 OS=Homo sapiens GN=FAT1 PE=1 SV=2 - [FAT1_HUMAN]	Q14517	N-Term(Diethyl(H)); T3(Hex)	ETciD	1.29889	1	0	1	1	Heavy	2.50495				1	64.7785	3	487.585	1460.74	-0.0275272	30.4129
YVTAVDRDSGR	Protocadherin Fat 1 OS=Homo sapiens GN=FAT1 PE=1 SV=2 - [FAT1_HUMAN]	Q14517	N-Term(Diethyl(H)); T3(Hex)	ETciD	1.07881	1	0	1	1	Heavy	2.03378				1	56.292	3	487.585	1460.74	0.0351483	30.4869
YVTAVDRDSGR	Protocadherin Fat 1 OS=Homo sapiens GN=FAT1 PE=1 SV=2 - [FAT1_HUMAN]	Q14517	N-Term(Diethyl(H)); T3(Hex)	ETciD	1.23401	1	0	1	1	Heavy	2.74092				1	59.6166	3	487.585	1460.74	0.223175	30.237
YVTAVDRDSGR	Protocadherin Fat 1 OS=Homo sapiens GN=FAT1 PE=1 SV=2 - [FAT1_HUMAN]	Q14517	N-Term(Diethyl(H)); T3(Hex)	HCD	1.23401	1	0	1	1	Heavy		369.154	3.88782e-35	1.21494e-37	1	59.6166	3	487.585	1460.74	0.223175	30.2528
YVTAVDRDSGR	Protocadherin Fat 1 OS=Homo sapiens GN=FAT1 PE=1 SV=2 - [FAT1_HUMAN]	Q14517	N-Term(Diethyl(H)); T3(Hex)	ETciD	1.35965	1	0	1	1	Heavy	2.06631				1	43.0166	2	730.874	1460.74	0.23238	30.7261
YVTAVDRDSGR	Protocadherin Fat 1 OS=Homo sapiens GN=FAT1 PE=1 SV=2 - [FAT1_HUMAN]	Q14517	N-Term(Diethyl(H)); T3(Hex)	HCD	1.35965	1	0	1	1	Heavy		286.891	6.60862e-27	2.04601e-29	1	43.0166	2	730.874	1460.74	0.23238	30.7391
YVTAVDRDSGR	Protocadherin Fat 1 OS=Homo sapiens GN=FAT1 PE=1 SV=2 - [FAT1_HUMAN]	Q14517	N-Term(Diethyl(H)); T3(Hex)	ETciD	1.35469	1	0	1	1	Heavy	2.11923				1	50.5766	2	730.875	1460.74	0.900918	30.7669
YVTAVDRDSGR	Protocadherin Fat 1 OS=Homo sapiens GN=FAT1 PE=1 SV=2 - [FAT1_HUMAN]	Q14517	N-Term(Diethyl(H)); T3(Hex)	HCD	1.35469	1	0	1	1	Heavy		233.712	1.52729e-21	4.25428e-24	1	50.5766	2	730.875	1460.74	0.900918	30.7794
DVSVIQIQAEDPDSSSNEK	Protocadherin Fat 3 OS=Homo sapiens GN=FAT3 PE=2 SV=2 - [FAT3_HUMAN]	Q8TDW7	N-Term(Diethyl); S3(Hex); K19(Diethyl)	ETciD	0.729998	1	0	1	1	Light	3.26611				0	20.5828	3	779.052	2335.14	0.715338	84.0535
DVSVIQIQAEDPDSSSNEK	Protocadherin Fat 3 OS=Homo sapiens GN=FAT3 PE=2 SV=2 - [FAT3_HUMAN]	Q8TDW7	N-Term(Diethyl(H)); S3(Hex); K19(Diethyl(H))	ETciD	0.749341	1	0	1	1	Heavy	3.50041				0	20.7845	3	781.727	2343.17	0.0682857	84.1008
DVSVIQIQAEDPDSSSNEK	Protocadherin Fat 3 OS=Homo sapiens GN=FAT3 PE=2 SV=2 - [FAT3_HUMAN]	Q8TDW7	N-Term(Diethyl(H)); S3(Hex); K19(Diethyl(H))	HCD	0.749341	1	0	1	1	Heavy		592.235	5.55269e-57	5.97706e-60	0	20.7845	3	781.727	2343.17	0.0682857	84.1153
DVSVIQIQAEDPDSSSNEK	Protocadherin Fat 3 OS=Homo sapiens GN=FAT3 PE=2 SV=2 - [FAT3_HUMAN]	Q8TDW7	N-Term(Diethyl(H)); S3(Hex); K19(Diethyl(H))	ETciD	0.713681	1	0	1	1	Heavy	4.12762				0	12.3418	3	781.728	2343.17	0.537152	84.4086
DVSVIQIQAEDPDSSSNEK	Protocadherin Fat 3 OS=Homo sapiens GN=FAT3 PE=2 SV=2 - [FAT3_HUMAN]	Q8TDW7	N-Term(Diethyl(H)); S3(Hex); K19(Diethyl(H))	HCD	0.713681	1	0	1	1	Heavy		602.815	4.71172e-58	5.22943e-61	0	12.3418	3	781.728	2343.17	0.537152	84.4225
DVSVIQIQAEDPDSSSNEK	Protocadherin Fat 3 OS=Homo sapiens GN=FAT3 PE=2 SV=2 - [FAT3_HUMAN]	Q8TDW7	N-Term(Diethyl(H)); S3(Hex); K19(Diethyl(H))	HCD	0.79857	1	0	1	1	Heavy		617.111	1.80111e-59	1.94504e-62	0	3.86416	2	1172.09	2343.17	0.82942	84.1366
DVSVIQIQAEDPDSSSNEK	Protocadherin Fat 3 OS=Homo sapiens GN=FAT3 PE=2 SV=2 - [FAT3_HUMAN]	Q8TDW7	N-Term(Diethyl(H)); S3(Hex); K19(Diethyl(H))	HCD	0.771441	1	0	1	1	Heavy		500.294	9.14955e-48	9.34582e-51	0	0	2	1172.09	2343.17	1.24619	84.3784
IGTSVLQVTAR	Protocadherin Fat 3 OS=Homo sapiens GN=FAT3 PE=2 SV=2 - [FAT3_HUMAN]	Q8TDW7	N-Term(Diethyl(H)); T3(Hex)	ETciD	0.721063	1	0	1	1	Heavy	2.16355				0	30.5443	2	683.902	1366.8	0.137292	67.6644
IGTSVLQVTAR	Protocadherin Fat 3 OS=Homo sapiens GN=FAT3 PE=2 SV=2 - [FAT3_HUMAN]	Q8TDW7	N-Term(Diethyl(H)); S4(Hex)	HCD	0.721063	1	0	1	1	Heavy		446.764	7.75246e-43	2.10665e-45	0	30.5443	2	683.902	1366.8	0.137292	67.6763
IGTSVLQVTAR	Protocadherin Fat 3 OS=Homo sapiens GN=FAT3 PE=2 SV=2 - [FAT3_HUMAN]	Q8TDW7	N-Term(Diethyl(H)); S4(Hex)	ETciD	0.762633	1	0	1	1	Heavy	2.42302				0	38.5365	2	683.902	1366.8	0.226603	68.1006
IGTSVLQVTAR	Protocadherin Fat 3 OS=Homo sapiens GN=FAT3 PE=2 SV=2 - [FAT3_HUMAN]	Q8TDW7	N-Term(Diethyl(H)); T9(Hex)	ETciD	1.06156	1	0	1	1	Heavy	1.76235				0	32.7291	2	683.902	1366.8	0.226603	69.9458
IGTSVLQVTAR	Protocadherin Fat 3 OS=Homo sapiens GN=FAT3 PE=2 SV=2 - [FAT3_HUMAN]	Q8TDW7	N-Term(Diethyl(H)); T9(Hex)	HCD	0.762633	1	0	1	1	Heavy		391.559	2.56299e-37	6.98362e-40	0	38.5365	2	683.902	1366.8	0.226603	68.1153
IGTSVLQVTAR	Protocadherin Fat 3 OS=Homo sapiens GN=FAT3 PE=2 SV=2 - [FAT3_HUMAN]	Q8TDW7	N-Term(Diethyl(H)); T9(Hex)	ETciD	1.16637	1	0	1	1	Heavy	2.72549				0	56.1801	2	683.903	1366.8	0.315914	69.1792
IGTSVLQVTAR	Protocadherin Fat 3 OS=Homo sapiens GN=FAT3 PE=2 SV=2 - [FAT3_HUMAN]	Q8TDW7	N-Term(Diethyl); T3(Hex); T9(Hex)	ETciD	0.730392	1	0	1	1	Light	1.89359				0	6.3613	2	762.923	1524.84	0.779705	65.1665
IGTSVLQVTAR	Protocadherin Fat 3 OS=Homo sapiens GN=FAT3 PE=2 SV=2 - [FAT3_HUMAN]	Q8TDW7	N-Term(Diethyl); T3(Hex); T9(Hex)	ETciD	0.712158	1	0	1	1	Light	1.57572				0	2.13784	2	762.923	1524.84	0.85976	64.6394
LYGNNGVSSTAK	Protocadherin Fat 3 OS=Homo sapiens GN=FAT3 PE=2 SV=2 - [FAT3_HUMAN]	Q8TDW7	N-Term(Diethyl); S8(Hex); K12(Diethyl)	ETciD	0.509717	1	0	1	1	Light	2.31463				0	13.6818	2	742.896	1484.79	0.687385	39.4712
LYGNNGVSSTAK	Protocadherin Fat 3 OS=Homo sapiens GN=FAT3 PE=2 SV=2 - [FAT3_HUMAN]	Q8TDW7	N-Term(Diethyl); S8(Hex); K12(Diethyl)	ETciD	0.470156	1	0	1	1	Light	2.14773				0	10.6024	2	742.896	1484.79	0.769599	39.8513
LYGNNGVSSTAK	Protocadherin Fat 3 OS=Homo sapiens GN=FAT3 PE=2 SV=2 - [FAT3_HUMAN]	Q8TDW7	N-Term(Diethyl(H)); T10(Hex); K12(Diethyl(H))	HCD	0.509717	1	0	1	1	Heavy		355.409	1.21161e-33	2.87793e-36	0	39.9338	2	746.91	1492.81	0.612279	39.5028
LYGNNGVSSTAK	Protocadherin Fat 3 OS=Homo sapiens GN=FAT3 PE=2 SV=2 - [FAT3_HUMAN]	Q8TDW7	N-Term(Diethyl); S8(Hex); S9(Hex); K12(Diethyl)	ETciD	0.407047	1	0	1	1	Light	1.74513				0	27.9655	2	823.923	1646.84	0.417074	35.9998
GSPSQSTSVK	Protocadherin Fat 4 OS=Homo sapiens GN=FAT4 PE=1 SV=2 - [FAT4_HUMAN]	Q6V0I7	N-Term(Diethyl); S6(Hex); S8(Hex); K10(Diethyl)	ETciD	0.651948	1	0	1	1	Light	1.9773				0	2.23265	2	707.364	1413.72	0.640802	22.7023
GSPSQSTSVK	Protocadherin Fat 4 OS=Homo sapiens GN=FAT4 PE=1 SV=2 - [FAT4_HUMAN]	Q6V0I7	N-Term(Diethyl(H)); S4(Hex); T7(Hex); K10(Diethyl(H))	HCD	0.651948	1	0	1	1	Heavy		414.791	1.1846e-39	3.31821e-42	0	13.8859	2	711.377	1421.75	-0.0388099	22.7319
GSPSQSTSVK	Protocadherin Fat 4 OS=Homo sapiens GN=FAT4 PE=1 SV=2 - [FAT4_HUMAN]	Q6V0I7	N-Term(Diethyl(H)); S6(Hex); S8(Hex); K10(Diethyl(H))	ETciD	0.708332	1	0	1	1	Heavy	2.55666				0	15.8661	2	711.378	1421.75	0.218768	21.6398
GSPSQSTSVK	Protocadherin Fat 4 OS=Homo sapiens GN=FAT4 PE=1 SV=2 - [FAT4_HUMAN]	Q6V0I7	N-Term(Diethyl(H)); T7(Hex); S8(Hex); K10(Diethyl(H))	HCD	0.708332	1	0	1	1	Heavy		530.865	2.76153e-51	8.19445e-54	0	15.8661	2	711.378	1421.75	0.218768	21.6534
GSPSQSTSVK	Protocadherin Fat 4 OS=Homo sapiens GN=FAT4 PE=1 SV=2 - [FAT4_HUMAN]	Q6V0I7	N-Term(Diethyl(H)); S6(Hex); S8(Hex); K10(Diethyl(H))	ETciD	0.694644	1	0	1	1	Heavy	2.36708				0	27.2956	2	711.378	1421.75	0.390487	22.6259
GSPSQSTSVK	Protocadherin Fat 4 OS=Homo sapiens GN=FAT4 PE=1 SV=2 - [FAT4_HUMAN]	Q6V0I7	N-Term(Diethyl(H)); S6(Hex); T7(Hex); K10(Diethyl(H))	HCD	0.694644	1	0	1	1	Heavy		493.144	1.634e-47	4.84866e-50	0	27.2956	2	711.378	1421.75	0.390487	22.6361
QVILDTATDSDIGSNGVDHR	Protocadherin Fat 4 OS=Homo sapiens GN=FAT4 PE=1 SV=2 - [FAT4_HUMAN]	Q6V0I7	N-Term(Diethyl); T6(Hex)	ETciD	1.02192	1	0	1	1	Light	3.37453				0	41.5899	3	777.716	2331.13	1.15305	67.7953
QVILDTATDSDIGSNGVDHR	Protocadherin Fat 4 OS=Homo sapiens GN=FAT4 PE=1 SV=2 - [FAT4_HUMAN]	Q6V0I7	N-Term(Diethyl); T6(Hex); S14(Hex)	ETciD	0.8599	1	0	1	1	Light	2.07784				0	52.4029	3	831.733	2493.19	0.52806	65.3559
QVILDTATDSDIGSNGVDHR	Protocadherin Fat 4 OS=Homo sapiens GN=FAT4 PE=1 SV=2 - [FAT4_HUMAN]	Q6V0I7	N-Term(Diethyl); T6(Hex); S14(Hex)	ETciD	0.887566	1	0	1	1	Light	1.99285				0	34.668	3	831.734	2493.19	0.895272	65.9565
SSDKGSPSQSTSVK	Protocadherin Fat 4 OS=Homo sapiens GN=FAT4 PE=1 SV=2 - [FAT4_HUMAN]	Q6V0I7	N-Term(Diethyl); K4(Diethyl); S10(Hex); S12(Hex); K14(Diethyl)	ETciD	0.625512	1	0	1	1	Light	4.39186				1	30.5055	3	629.661	1886.97	0.255126	22.7863
SSDKGSPSQSTSVK	Protocadherin Fat 4 OS=Homo sapiens GN=FAT4 PE=1 SV=2 - [FAT4_HUMAN]	Q6V0I7	N-Term(Diethyl); K4(Diethyl); S10(Hex); S12(Hex); K14(Diethyl)	ETciD	0.635493	1	0	1	1	Light	2.15928				1	9.55189	3	629.661	1886.97	0.352163	25.1197
SSDKGSPSQSTSVK	Protocadherin Fat 4 OS=Homo sapiens GN=FAT4 PE=1 SV=2 - [FAT4_HUMAN]	Q6V0I7	N-Term(Diethyl); K4(Diethyl); S10(Hex); S12(Hex); K14(Diethyl)	ETciD	0.642318	1	0	1	1	Light	3.69734				1	9.77548	3	629.662	1886.97	0.546236	23.6708
SSDKGSPSQSTSVK	Protocadherin Fat 4 OS=Homo sapiens GN=FAT4 PE=1 SV=2 - [FAT4_HUMAN]	Q6V0I7	N-Term(Diethyl); K4(Diethyl); S10(Hex); S12(Hex); K14(Diethyl)	ETciD	0.69015	1	0	1	1	Light	4.4813				1	13.9431	3	629.662	1886.97	0.546236	23.4959
SSDKGSPSQSTSVK	Protocadherin Fat 4 OS=Homo sapiens GN=FAT4 PE=1 SV=2 - [FAT4_HUMAN]	Q6V0I7	N-Term(Diethyl(H)); K4(Diethyl(H)); S10(Hex); S12(Hex); K14(Diethyl(H))	ETciD	0.636907	1	0	1	1	Heavy	1.96633				1	35.5949	2	950.009	1899.01	0.144246	22.9775
VTTSDEDIGINAISR	Protocadherin Fat 4 OS=Homo sapiens GN=FAT4 PE=1 SV=2 - [FAT4_HUMAN]	Q6V0I7	N-Term(Diethyl); T2(Hex)	ETciD	0.845606	1	0	1	1	Light	1.58046				0	12.2449	2	904.96	1808.91	0.644872	75.7618
VTTSDEDIGINAISR	Protocadherin Fat 4 OS=Homo sapiens GN=FAT4 PE=1 SV=2 - [FAT4_HUMAN]	Q6V0I7	N-Term(Diethyl); T2(Hex)	ETciD	0.813711	1	0	1	1	Light	3.81363				0	29.5554	3	603.643	1808.91	1.00859	75.5714
VTTSDEDIGINAISR	Protocadherin Fat 4 OS=Homo sapiens GN=FAT4 PE=1 SV=2 - [FAT4_HUMAN]	Q6V0I7	N-Term(Diethyl(H)); T2(Hex)	ETciD	0.863964	1	0	1	1	Heavy	1.76712				0	25.2585	2	906.966	1812.93	-0.160289	75.6081
VTTSDEDIGINAISR	Protocadherin Fat 4 OS=Homo sapiens GN=FAT4 PE=1 SV=2 - [FAT4_HUMAN]	Q6V0I7	N-Term(Diethyl(H)); T2(Hex)	HCD	0.863964	1	0	1	1	Heavy		359.112	6.42866e-34	1.22684e-36	0	25.2585	2	906.966	1812.93	-0.160289	75.6204
VTTSDEDIGINAISR	Protocadherin Fat 4 OS=Homo sapiens GN=FAT4 PE=1 SV=2 - [FAT4_HUMAN]	Q6V0I7	N-Term(Diethyl(H)); T2(Hex)	ETciD	0.867295	1	0	1	1	Heavy	1.88705				0	23.5872	2	906.967	1812.93	0.378378	75.6775
VTTSDEDIGINAISR	Protocadherin Fat 4 OS=Homo sapiens GN=FAT4 PE=1 SV=2 - [FAT4_HUMAN]	Q6V0I7	N-Term(Diethyl(H)); T2(Hex)	HCD	0.867295	1	0	1	1	Heavy		537.338	1.02633e-51	1.84592e-54	0	23.5872	2	906.967	1812.93	0.378378	75.6934
GASIFSVTALDPDSK	Protocadherin gamma-A11 OS=Homo sapiens GN=PCDHGA11 PE=1 SV=1 - [PCDGB_HUMAN]	Q9Y5H2	N-Term(Diethyl); S3(Hex); S6(Hex); K15(Diethyl)	ETciD	0.837224	1	0	1	1	Light	3.16408				0	21.9802	3	648.67	1944	0.311822	98.2295
GASIFSVTALDPDSK	Protocadherin gamma-A11 OS=Homo sapiens GN=PCDHGA11 PE=1 SV=1 - [PCDGB_HUMAN]	Q9Y5H2	N-Term(Diethyl); S3(Hex); S6(Hex); K15(Diethyl)	ETciD	0.807666	1	0	1	1	Light	1.95313				0	7.39911	2	972.502	1944	0.758293	98.2237
GASIFSVTALDPDSK	Protocadherin gamma-A11 OS=Homo sapiens GN=PCDHGA11 PE=1 SV=1 - [PCDGB_HUMAN]	Q9Y5H2	N-Term(Diethyl(H)); S3(Hex); S6(Hex); K15(Diethyl(H))	ETciD	0.776091	1	0	1	1	Heavy	2.61841				0	21.8152	3	651.346	1952.02	0.287197	98.5458
GASIFSVTALDPDSK	Protocadherin gamma-A11 OS=Homo sapiens GN=PCDHGA11 PE=1 SV=1 - [PCDGB_HUMAN]	Q9Y5H2	N-Term(Diethyl(H)); S3(Hex); S14(Hex); K15(Diethyl(H))	HCD	0.837224	1	0	1	1	Heavy		510.649	5.97599e-49	8.61093e-52	0	16.3335	3	651.346	1952.02	0.287197	98.321
GASIFSVTALDPDSK	Protocadherin gamma-A11 OS=Homo sapiens GN=PCDHGA11 PE=1 SV=1 - [PCDGB_HUMAN]	Q9Y5H2	N-Term(Diethyl(H)); S3(Hex); S14(Hex); K15(Diethyl(H))	HCD	0.776091	1	0	1	1	Heavy		529.17	8.40128e-51	1.21056e-53	0	21.8152	3	651.346	1952.02	0.287197	98.5602
GASIFSVTALDPDSK	Protocadherin gamma-A11 OS=Homo sapiens GN=PCDHGA11 PE=1 SV=1 - [PCDGB_HUMAN]	Q9Y5H2	N-Term(Diethyl(H)); S6(Hex); T8(Hex); K15(Diethyl(H))	HCD	0.761429	1	0	1	1	Heavy		481.273	5.13916e-46	7.45886e-49	0	7.39596	2	976.515	1952.02	0.763099	98.5439
GASIFSVTALDPDSK	Protocadherin gamma-A11 OS=Homo sapiens GN=PCDHGA11 PE=1 SV=1 - [PCDGB_HUMAN]	Q9Y5H2	N-Term(Diethyl(H)); S6(Hex); T8(Hex); K15(Diethyl(H))	HCD	0.706321	1	0	1	1	Heavy		275.314	1.93573e-25	2.94183e-28	0	5.81373	2	976.515	1952.02	0.950705	98.4407
GASIFSVTALDPDSK	Protocadherin gamma-A11 OS=Homo sapiens GN=PCDHGA11 PE=1 SV=1 - [PCDGB_HUMAN]	Q9Y5H2	N-Term(Diethyl(H)); S3(Hex); T8(Hex); K15(Diethyl(H))	HCD	0.807666	1	0	1	1	Heavy		589.783	6.83322e-57	1.05126e-59	0	8.69448	2	976.516	1952.02	1.13831	98.2791
GASIFSVTALDPDSK	Protocadherin gamma-A11 OS=Homo sapiens GN=PCDHGA11 PE=1 SV=1 - [PCDGB_HUMAN]	Q9Y5H2	N-Term(Diethyl(H)); S3(Hex); T8(Hex); K15(Diethyl(H))	HCD	0.770739	1	0	1	1	Heavy		462.077	4.01638e-44	6.19812e-47	0	8.60777	2	976.516	1952.02	1.20085	98.6683
VSLQENVPWGTSVLR	Protocadherin gamma-B1 OS=Homo sapiens GN=PCDHGB1 PE=2 SV=1 - [PCDGD_HUMAN]	Q9Y5G3	N-Term(Diethyl(H)); S12(Hex)	ETciD	1.75632	1	0	1	1	Heavy	2.99107				0	49.5868	3	636.349	1907.03	0.382735	100.526
VSLQENVPWGTSVLR	Protocadherin gamma-B1 OS=Homo sapiens GN=PCDHGB1 PE=2 SV=1 - [PCDGD_HUMAN]	Q9Y5G3	N-Term(Diethyl(H)); S12(Hex)	HCD	1.75632	1	0	1	1	Heavy		391.82	4.36015e-37	6.57639e-40	0	49.5868	3	636.349	1907.03	0.382735	100.537
VSLQENVPWGTSVLR	Protocadherin gamma-B1 OS=Homo sapiens GN=PCDHGB1 PE=2 SV=1 - [PCDGD_HUMAN]	Q9Y5G3	N-Term(Diethyl(H)); S12(Hex)	ETciD	1.76735	1	0	1	1	Heavy	2.04397				0	20.7858	2	954.02	1907.03	1.12591	100.495
VSLQENVPWGTSVLR	Protocadherin gamma-B1 OS=Homo sapiens GN=PCDHGB1 PE=2 SV=1 - [PCDGD_HUMAN]	Q9Y5G3	N-Term(Diethyl(H)); T11(Hex)	HCD	1.76735	1	0	1	1	Heavy		361.718	4.42365e-34	6.7331e-37	0	20.7858	2	954.02	1907.03	1.12591	100.51
LVLTALDGGHPPLSGTTELR	Protocadherin gamma-B5 OS=Homo sapiens GN=PCDHGB5 PE=2 SV=1 - [PCDGH_HUMAN]	Q9Y5G0	N-Term(Diethyl(H)); T16(Hex); T17(Hex)	ETciD	1.46051	1	0	1	1	Heavy	3.06427				0	33.9572	3	811.105	2431.3	0.762431	91.344
LVLTALDGGHPPLSGTTELR	Protocadherin gamma-B5 OS=Homo sapiens GN=PCDHGB5 PE=2 SV=1 - [PCDGH_HUMAN]	Q9Y5G0	N-Term(Diethyl(H)); S14(Hex); T16(Hex)	HCD	1.46051	1	0	1	1	Heavy		692.26	5.33726e-67	5.94349e-70	0	33.9572	3	811.105	2431.3	0.762431	91.3567
DAGTPSLSALTIVR	Protocadherin gamma-C3 OS=Homo sapiens GN=PCDHGC3 PE=1 SV=1 - [PCDGK_HUMAN]	Q9UN70	N-Term(Diethyl(H)); T11(Hex)	HCD	1.50693	1	0	1	1	Heavy		334.831	1.40399e-31	3.28804e-34	0	48.7753	2	811.956	1622.9	0.276555	99.3252
DAGTPSLSALTIVR	Protocadherin gamma-C3 OS=Homo sapiens GN=PCDHGC3 PE=1 SV=1 - [PCDGK_HUMAN]	Q9UN70	N-Term(Diethyl(H)); S8(Hex)	ETciD	1.4462	1	0	1	1	Heavy	1.65958				0	31.1049	2	811.956	1622.9	0.652641	99.2016
DAGTPSLSALTIVR	Protocadherin gamma-C3 OS=Homo sapiens GN=PCDHGC3 PE=1 SV=1 - [PCDGK_HUMAN]	Q9UN70	N-Term(Diethyl(H)); T11(Hex)	HCD	1.64127	1	0	1	1	Heavy		359.016	5.70718e-34	1.25433e-36	0	40.273	2	811.956	1622.9	0.652641	99.2845
DAGTPSLSALTIVR	Protocadherin gamma-C3 OS=Homo sapiens GN=PCDHGC3 PE=1 SV=1 - [PCDGK_HUMAN]	Q9UN70	N-Term(Diethyl(H)); T11(Hex)	HCD	1.4462	1	0	1	1	Heavy		362.72	2.43211e-34	5.34529e-37	0	31.1049	2	811.956	1622.9	0.652641	99.2142
DAGTPSLSALTIVR	Protocadherin gamma-C3 OS=Homo sapiens GN=PCDHGC3 PE=1 SV=1 - [PCDGK_HUMAN]	Q9UN70	N-Term(Diethyl(H)); S8(Hex)	ETciD	1.43102	1	0	1	1	Heavy	1.83422				0	29.0064	2	811.956	1622.9	0.727858	99.4169
DAGTPSLSALTIVR	Protocadherin gamma-C3 OS=Homo sapiens GN=PCDHGC3 PE=1 SV=1 - [PCDGK_HUMAN]	Q9UN70	N-Term(Diethyl(H)); S8(Hex)	ETciD	1.48034	1	0	1	1	Heavy	1.60048				0	51.8343	2	811.956	1622.9	0.727858	99.1835
DAGTPSLSALTIVR	Protocadherin gamma-C3 OS=Homo sapiens GN=PCDHGC3 PE=1 SV=1 - [PCDGK_HUMAN]	Q9UN70	N-Term(Diethyl(H)); T11(Hex)	HCD	1.43102	1	0	1	1	Heavy		507.183	8.62658e-49	1.91277e-51	0	29.0064	2	811.956	1622.9	0.727858	99.4303
DAGTPSLSALTIVR	Protocadherin gamma-C3 OS=Homo sapiens GN=PCDHGC3 PE=1 SV=1 - [PCDGK_HUMAN]	Q9UN70	N-Term(Diethyl(H)); T11(Hex)	HCD	1.48034	1	0	1	1	Heavy		334.493	1.60292e-31	3.55416e-34	0	51.8343	2	811.956	1622.9	0.727858	99.1951
DAGTPSLSALTIVR	Protocadherin gamma-C3 OS=Homo sapiens GN=PCDHGC3 PE=1 SV=1 - [PCDGK_HUMAN]	Q9UN70	N-Term(Diethyl(H)); S8(Hex)	ETciD	1.44523	1	0	1	1	Heavy	1.67616				0	41.4347	2	811.956	1622.91	1.17916	99.3569
DAGTPSLSALTIVR	Protocadherin gamma-C3 OS=Homo sapiens GN=PCDHGC3 PE=1 SV=1 - [PCDGK_HUMAN]	Q9UN70	N-Term(Diethyl(H)); T11(Hex)	HCD	1.44523	1	0	1	1	Heavy		432.363	2.60559e-41	5.8031e-44	0	41.4347	2	811.956	1622.91	1.17916	99.371
AQDADVGSNSISSYR	Protocadherin gamma-C4 OS=Homo sapiens GN=PCDHGC4 PE=1 SV=1 - [PCDGL_HUMAN]	Q9Y5F7	N-Term(Diethyl(H)); S8(Hex)	ETciD	1.37879	1	0	1	1	Heavy	1.7637				0	29.6471	2	896.425	1791.84	0.321506	54.2022
AQDADVGSNSISSYR	Protocadherin gamma-C4 OS=Homo sapiens GN=PCDHGC4 PE=1 SV=1 - [PCDGL_HUMAN]	Q9Y5F7	N-Term(Diethyl(H)); S8(Hex)	HCD	1.37879	1	0	1	1	Heavy		273.82	1.15774e-25	4.14961e-28	0	29.6471	2	896.425	1791.84	0.321506	54.2166
AQDADVGSNSISSYR	Protocadherin gamma-C4 OS=Homo sapiens GN=PCDHGC4 PE=1 SV=1 - [PCDGL_HUMAN]	Q9Y5F7	N-Term(Diethyl(H)); S8(Hex)	ETciD	1.5237	1	0	1	1	Heavy	2.19537				0	20.4449	2	896.426	1791.84	0.525882	54.5788
AQDADVGSNSISSYR	Protocadherin gamma-C4 OS=Homo sapiens GN=PCDHGC4 PE=1 SV=1 - [PCDGL_HUMAN]	Q9Y5F7	N-Term(Diethyl(H)); S8(Hex)	HCD	1.5237	1	0	1	1	Heavy		720.301	2.61226e-70	9.32949e-73	0	20.4449	2	896.426	1791.84	0.525882	54.5921
AQDADVGSNSISSYR	Protocadherin gamma-C4 OS=Homo sapiens GN=PCDHGC4 PE=1 SV=1 - [PCDGL_HUMAN]	Q9Y5F7	N-Term(Diethyl(H)); S8(Hex)	HCD	1.47237	1	0	1	1	Heavy		423.6	1.22234e-40	4.36551e-43	0	18.7655	2	896.426	1791.84	0.662133	54.9639
SGTAELR	Protocadherin gamma-C4 OS=Homo sapiens GN=PCDHGC4 PE=1 SV=1 - [PCDGL_HUMAN]	Q9Y5F7	N-Term(Diethyl(H)); S1(Hex); T3(Hex)	HCD	1.56335	1	0	1	1	Heavy		300.735	1.72222e-28	8.44224e-31	0	50.727	2	559.286	1117.57	-0.218407	19.9477
FERPSYEAELSENSPIGHSVIQVK	Protocadherin-1 OS=Homo sapiens GN=PCDH1 PE=1 SV=2 - [PCDH1_HUMAN]	Q08174	N-Term(Diethyl(H)); S19(Hex); K24(Diethyl(H))	ETciD	0.880925	1	0	1	1	Heavy	4.65904				0	29.7219	4	750.396	2998.56	-0.00417658	87.1607
FERPSYEAELSENSPIGHSVIQVK	Protocadherin-1 OS=Homo sapiens GN=PCDH1 PE=1 SV=2 - [PCDH1_HUMAN]	Q08174	N-Term(Diethyl(H)); S11(Hex); K24(Diethyl(H))	HCD	0.880925	1	0	1	1	Heavy		563.838	5.2851e-54	4.13221e-57	0	29.7219	4	750.396	2998.56	-0.00417658	87.174
FPLESAFDPDVGTNSLR	Protocadherin-10 OS=Homo sapiens GN=PCDH10 PE=2 SV=2 - [PCD10_HUMAN]	Q9P2E7	N-Term(Diethyl); T13(Hex)	ETciD	1.09435	1	0	1	1	Light	4.07391				0	39.3855	3	695.013	2083.02	0.830103	104.318
FPLESAFDPDVGTNSLR	Protocadherin-10 OS=Homo sapiens GN=PCDH10 PE=2 SV=2 - [PCD10_HUMAN]	Q9P2E7	N-Term(Diethyl(H)); S15(Hex)	ETciD	1.16917	1	0	1	1	Heavy	2.47813				0	9.16797	2	1044.02	2087.04	0.429228	104.36
FPLESAFDPDVGTNSLR	Protocadherin-10 OS=Homo sapiens GN=PCDH10 PE=2 SV=2 - [PCD10_HUMAN]	Q9P2E7	N-Term(Diethyl(H)); T13(Hex)	HCD	1.16917	1	0	1	1	Heavy		582.423	4.04718e-56	5.72444e-59	0	9.16797	2	1044.02	2087.04	0.429228	104.374
TGTALLTIR	Protocadherin-10 OS=Homo sapiens GN=PCDH10 PE=2 SV=2 - [PCD10_HUMAN]	Q9P2E7	N-Term(Diethyl); T1(Hex); T3(Hex)	ETciD	0.368945	1	0	1	1	Light	1.59798				0	0	2	663.375	1325.74	1.26275	65.6755
TGTALLTIR	Protocadherin-10 OS=Homo sapiens GN=PCDH10 PE=2 SV=2 - [PCD10_HUMAN]	Q9P2E7	N-Term(Diethyl(H)); T1(Hex); T3(Hex)	ETciD	0.907901	1	0	1	1	Heavy	1.87696				0	27.2287	2	665.381	1329.75	0.0713668	64.458
TGTALLTIR	Protocadherin-10 OS=Homo sapiens GN=PCDH10 PE=2 SV=2 - [PCD10_HUMAN]	Q9P2E7	N-Term(Diethyl(H)); T1(Hex); T3(Hex)	ETciD	0.893185	1	0	1	1	Heavy	1.95785				0	18.5162	2	665.381	1329.76	0.438563	64.293
TGTALLTIR	Protocadherin-10 OS=Homo sapiens GN=PCDH10 PE=2 SV=2 - [PCD10_HUMAN]	Q9P2E7	N-Term(Diethyl(H)); T1(Hex); T3(Hex)	ETciD	0.79986	1	0	1	1	Heavy	2.02461				0	19.3852	2	665.381	1329.76	0.71396	65.1003
TGTALLTIR	Protocadherin-10 OS=Homo sapiens GN=PCDH10 PE=2 SV=2 - [PCD10_HUMAN]	Q9P2E7	N-Term(Diethyl(H)); T3(Hex); T7(Hex)	HCD	0.79986	1	0	1	1	Heavy		319.086	4.49314e-30	1.23438e-32	0	19.3852	2	665.381	1329.76	0.71396	65.1122
SGTSLVK	Protocadherin-12 OS=Homo sapiens GN=PCDH12 PE=2 SV=1 - [PCD12_HUMAN]	Q9NPG4	N-Term(Diethyl(H)); S1(Hex); T3(Hex); K7(Diethyl(H))	HCD	1.25711	1	0	1	1	Heavy		227.221	6.03004e-21	1.89624e-23	0	55.0835	2	568.332	1135.66	0.409023	32.1089
AELGQQTGTATVR	Protocadherin-16 OS=Homo sapiens GN=DCHS1 PE=2 SV=1 - [PCD16_HUMAN]	Q96JQ0	N-Term(Diethyl); T7(Hex); T9(Hex); T11(Hex)	ETciD	0.750111	1	0	1	1	Light	1.7352				0	29.8672	2	937.461	1873.91	0.66203	34.8351
AELGQQTGTATVR	Protocadherin-16 OS=Homo sapiens GN=DCHS1 PE=2 SV=1 - [PCD16_HUMAN]	Q96JQ0	N-Term(Diethyl); T7(Hex); T9(Hex); T11(Hex)	ETciD	0.776904	1	0	1	1	Light	1.89581				0	26.5154	2	937.461	1873.91	0.727172	34.7494
AELGQQTGTATVR	Protocadherin-16 OS=Homo sapiens GN=DCHS1 PE=2 SV=1 - [PCD16_HUMAN]	Q96JQ0	N-Term(Diethyl); T7(Hex); T9(Hex); T11(Hex)	ETciD	0.664136	1	0	1	1	Light	1.57332				0	23.5976	2	937.461	1873.91	0.98774	35.6999
SATVQINVK	Protocadherin-17 OS=Homo sapiens GN=PCDH17 PE=2 SV=2 - [PCD17_HUMAN]	O14917	N-Term(Diethyl); S1(Hex); T3(Hex); K9(Diethyl)	ETciD	1.38747	1	0	1	1	Light	2.10628				0	5.60474	2	698.396	1395.78	0.681893	52.5925
SATVQINVK	Protocadherin-17 OS=Homo sapiens GN=PCDH17 PE=2 SV=2 - [PCD17_HUMAN]	O14917	N-Term(Diethyl(H)); S1(Hex); T3(Hex); K9(Diethyl(H))	HCD	1.38142	1	0	1	1	Heavy		269.667	2.8394e-25	1.07962e-27	0	24.1969	2	702.409	1403.81	0.341188	51.4868
SATVQINVK	Protocadherin-17 OS=Homo sapiens GN=PCDH17 PE=2 SV=2 - [PCD17_HUMAN]	O14917	N-Term(Diethyl(H)); S1(Hex); T3(Hex); K9(Diethyl(H))	HCD	1.38747	1	0	1	1	Heavy		414.681	9.05312e-40	3.40343e-42	0	15.3851	2	702.409	1403.81	0.862926	52.564
SGSSILK	Protocadherin-18 OS=Homo sapiens GN=PCDH18 PE=2 SV=3 - [PCD18_HUMAN]	Q9HCL0	N-Term(Diethyl); S1(Hex); S3(Hex); K7(Diethyl)	ETciD	0.768242	1	0	1	1	Light	1.69582				0	31.7118	2	564.318	1127.63	0.289963	36.2788
SGSSILK	Protocadherin-18 OS=Homo sapiens GN=PCDH18 PE=2 SV=3 - [PCD18_HUMAN]	Q9HCL0	N-Term(Diethyl(H)); S1(Hex); S3(Hex); K7(Diethyl(H))	ETciD	0.798848	1	0	1	1	Heavy	1.78309				0	38.5641	2	568.332	1135.66	0.0865568	34.8622
LGTVGLSIK	Protocadherin-19 OS=Homo sapiens GN=PCDH19 PE=1 SV=3 - [PCD19_HUMAN]	Q8TAB3	N-Term(Diethyl(H)); T3(Hex); K9(Diethyl(H))	ETciD	0.838699	1	0	1	1	Heavy	2.13351				0	10.4188	2	585.384	1169.76	0.0672162	77.434
LGTVGLSIK	Protocadherin-19 OS=Homo sapiens GN=PCDH19 PE=1 SV=3 - [PCD19_HUMAN]	Q8TAB3	N-Term(Diethyl(H)); T3(Hex); K9(Diethyl(H))	HCD	0.838699	1	0	1	1	Heavy		345	4.30052e-33	3.16215e-35	0	10.4188	2	585.384	1169.76	0.0672162	77.4465
LGTVGLSIK	Protocadherin-19 OS=Homo sapiens GN=PCDH19 PE=1 SV=3 - [PCD19_HUMAN]	Q8TAB3	N-Term(Diethyl(H)); T3(Hex); K9(Diethyl(H))	ETciD	0.656191	1	0	1	1	Heavy	1.59603				0	48.7495	2	585.384	1169.76	0.275926	77.0549
LGTVGLSIK	Protocadherin-19 OS=Homo sapiens GN=PCDH19 PE=1 SV=3 - [PCD19_HUMAN]	Q8TAB3	N-Term(Diethyl(H)); T3(Hex); K9(Diethyl(H))	ETciD	0.654917	1	0	1	1	Heavy	1.65553				0	47.9524	2	585.384	1169.76	0.380281	77.3045
LGTVGLSIK	Protocadherin-19 OS=Homo sapiens GN=PCDH19 PE=1 SV=3 - [PCD19_HUMAN]	Q8TAB3	N-Term(Diethyl(H)); T3(Hex); K9(Diethyl(H))	ETciD	0.721998	1	0	1	1	Heavy	1.60349				0	47.7574	2	585.384	1169.76	0.58899	77.1213
LGTVGLSIK	Protocadherin-19 OS=Homo sapiens GN=PCDH19 PE=1 SV=3 - [PCD19_HUMAN]	Q8TAB3	N-Term(Diethyl(H)); T3(Hex); K9(Diethyl(H))	HCD	0.721998	1	0	1	1	Heavy		268.927	1.76687e-25	1.28034e-27	0	47.7574	2	585.384	1169.76	0.58899	77.1321
LGTVGLSIK	Protocadherin-19 OS=Homo sapiens GN=PCDH19 PE=1 SV=3 - [PCD19_HUMAN]	Q8TAB3	N-Term(Diethyl(H)); T3(Hex); K9(Diethyl(H))	ETciD	0.824303	1	0	1	1	Heavy	2.01542				0	11.3292	2	585.385	1169.76	0.693345	75.9072
LGTVGLSIK	Protocadherin-19 OS=Homo sapiens GN=PCDH19 PE=1 SV=3 - [PCD19_HUMAN]	Q8TAB3	N-Term(Diethyl(H)); T3(Hex); K9(Diethyl(H))	HCD	0.824303	1	0	1	1	Heavy		224.296	5.13213e-21	3.71893e-23	0	11.3292	2	585.385	1169.76	0.693345	75.9201
LLSVSAR	Protocadherin-19 OS=Homo sapiens GN=PCDH19 PE=1 SV=3 - [PCD19_HUMAN]	Q8TAB3	N-Term(Diethyl(H)); S5(Hex)	HCD	3.7196	1	0	1	1	Heavy		306.244	1.06575e-27	2.37466e-31	0	10.5609	2	484.297	967.586	0.769931	46.7658
ENLQPNSPVGMVTVM	Protocadherin-7 OS=Homo sapiens GN=PCDH7 PE=1 SV=2 - [PCDH7_HUMAN]	O60245	N-Term(Diethyl(H)); S7(Hex); M11(Oxidation); M15(Oxidation)	HCD	1.45556	1	0	1	1	Heavy		340.029	7.19554e-31	9.9331e-35	0	18.0151	2	935.455	1869.9	0.889875	77.0329
ENLQPNSPVGMVTVMDADK	Protocadherin-7 OS=Homo sapiens GN=PCDH7 PE=1 SV=2 - [PCDH7_HUMAN]	O60245	N-Term(Diethyl); T13(Hex); K19(Diethyl)	ETciD	0.850683	1	0	1	1	Light	2.46909				0	10.3105	3	773.721	2319.15	0.694576	96.5432
ENLQPNSPVGMVTVMDADK	Protocadherin-7 OS=Homo sapiens GN=PCDH7 PE=1 SV=2 - [PCDH7_HUMAN]	O60245	N-Term(Diethyl(H)); T13(Hex); K19(Diethyl(H))	HCD	0.850683	1	0	1	1	Heavy		454.71	3.01877e-43	3.38048e-46	0	14.6864	3	776.396	2327.17	0.279193	96.5352
ENLQPNSPVGMVTVMDADK	Protocadherin-7 OS=Homo sapiens GN=PCDH7 PE=1 SV=2 - [PCDH7_HUMAN]	O60245	N-Term(Diethyl); M11(Oxidation); T13(Hex); K19(Diethyl)	ETciD	0.845183	1	0	1	1	Light	2.40668				0	9.24405	3	779.052	2335.14	0.332063	83.0463
ENLQPNSPVGMVTVMDADK	Protocadherin-7 OS=Homo sapiens GN=PCDH7 PE=1 SV=2 - [PCDH7_HUMAN]	O60245	N-Term(Diethyl); M11(Oxidation); T13(Hex); K19(Diethyl)	ETciD	0.955695	1	0	1	1	Light	4.18426				0	9.90908	3	779.052	2335.14	0.332063	82.8089
ENLQPNSPVGMVTVMDADK	Protocadherin-7 OS=Homo sapiens GN=PCDH7 PE=1 SV=2 - [PCDH7_HUMAN]	O60245	N-Term(Diethyl(H)); T13(Hex); M15(Oxidation); K19(Diethyl(H))	ETciD	0.935575	1	0	1	1	Heavy	4.25963				0	9.40387	3	781.728	2343.17	0.155191	81.4466
ENLQPNSPVGMVTVMDADK	Protocadherin-7 OS=Homo sapiens GN=PCDH7 PE=1 SV=2 - [PCDH7_HUMAN]	O60245	N-Term(Diethyl(H)); S7(Hex); M15(Oxidation); K19(Diethyl(H))	HCD	0.935575	1	0	1	1	Heavy		812.296	5.31043e-79	5.89393e-82	0	9.40387	3	781.728	2343.17	0.155191	81.4605
ENLQPNSPVGMVTVMDADK	Protocadherin-7 OS=Homo sapiens GN=PCDH7 PE=1 SV=2 - [PCDH7_HUMAN]	O60245	N-Term(Diethyl(H)); M11(Oxidation); T13(Hex); K19(Diethyl(H))	ETciD	0.892455	1	0	1	1	Heavy	2.05279				0	38.9153	3	781.728	2343.17	0.233335	83.0311
ENLQPNSPVGMVTVMDADK	Protocadherin-7 OS=Homo sapiens GN=PCDH7 PE=1 SV=2 - [PCDH7_HUMAN]	O60245	N-Term(Diethyl(H)); S7(Hex); M11(Oxidation); K19(Diethyl(H))	HCD	0.892455	1	0	1	1	Heavy		514.007	3.61731e-49	3.97507e-52	0	38.9153	3	781.728	2343.17	0.233335	83.0424
ENLQPNSPVGMVTVMDADK	Protocadherin-7 OS=Homo sapiens GN=PCDH7 PE=1 SV=2 - [PCDH7_HUMAN]	O60245	N-Term(Diethyl(H)); T13(Hex); M15(Oxidation); K19(Diethyl(H))	ETciD	0.973313	1	0	1	1	Heavy	2.33951				0	19.2254	3	781.728	2343.17	0.467768	81.7342
ENLQPNSPVGMVTVMDADK	Protocadherin-7 OS=Homo sapiens GN=PCDH7 PE=1 SV=2 - [PCDH7_HUMAN]	O60245	N-Term(Diethyl(H)); S7(Hex); M15(Oxidation); K19(Diethyl(H))	HCD	0.973313	1	0	1	1	Heavy		641.07	7.22943e-62	7.8156e-65	0	19.2254	3	781.728	2343.17	0.467768	81.7471
ENLQPNSPVGMVTVMDADK	Protocadherin-7 OS=Homo sapiens GN=PCDH7 PE=1 SV=2 - [PCDH7_HUMAN]	O60245	N-Term(Diethyl(H)); S7(Hex); M11(Oxidation); K19(Diethyl(H))	HCD	0.845183	1	0	1	1	Heavy		380.416	8.4054e-36	9.08692e-39	0	39.9419	3	781.728	2343.17	0.467768	83.0839
ENLQPNSPVGMVTVMDADK	Protocadherin-7 OS=Homo sapiens GN=PCDH7 PE=1 SV=2 - [PCDH7_HUMAN]	O60245	N-Term(Diethyl(H)); S7(Hex); M15(Oxidation); K19(Diethyl(H))	HCD	0.939801	1	0	1	1	Heavy		403.588	4.15353e-38	4.37674e-41	0	11.7724	2	1172.09	2343.17	0.551651	81.5441
ENLQPNSPVGMVTVMDADK	Protocadherin-7 OS=Homo sapiens GN=PCDH7 PE=1 SV=2 - [PCDH7_HUMAN]	O60245	N-Term(Diethyl(H)); S7(Hex); M11(Oxidation); K19(Diethyl(H))	HCD	0.927034	1	0	1	1	Heavy		275.336	2.86244e-25	2.92683e-28	0	7.61525	2	1172.09	2343.17	1.17681	82.9316
ENLQPNSPVGMVTVMDADK	Protocadherin-7 OS=Homo sapiens GN=PCDH7 PE=1 SV=2 - [PCDH7_HUMAN]	O60245	N-Term(Diethyl); M11(Oxidation); T13(Hex); M15(Oxidation); K19(Diethyl)	ETciD	0.915401	1	0	1	1	Light	3.60522				0	7.80773	3	784.384	2351.14	0.44176	71.7726
ENLQPNSPVGMVTVMDADK	Protocadherin-7 OS=Homo sapiens GN=PCDH7 PE=1 SV=2 - [PCDH7_HUMAN]	O60245	N-Term(Diethyl); M11(Oxidation); T13(Hex); M15(Oxidation); K19(Diethyl)	ETciD	0.960686	1	0	1	1	Light	1.74039				0	8.07325	2	1176.07	2351.14	1.45991	71.8587
ENLQPNSPVGMVTVMDADK	Protocadherin-7 OS=Homo sapiens GN=PCDH7 PE=1 SV=2 - [PCDH7_HUMAN]	O60245	N-Term(Diethyl(H)); M11(Oxidation); T13(Hex); M15(Oxidation); K19(Diethyl(H))	ETciD	0.96143	1	0	1	1	Heavy	3.8161				0	15.981	3	787.059	2359.16	-0.199975	71.2811
ENLQPNSPVGMVTVMDADK	Protocadherin-7 OS=Homo sapiens GN=PCDH7 PE=1 SV=2 - [PCDH7_HUMAN]	O60245	N-Term(Diethyl(H)); S7(Hex); M11(Oxidation); M15(Oxidation); K19(Diethyl(H))	HCD	0.96143	1	0	1	1	Heavy		836.133	1.99505e-81	2.43595e-84	0	15.981	3	787.059	2359.16	-0.199975	71.2915
ENLQPNSPVGMVTVMDADK	Protocadherin-7 OS=Homo sapiens GN=PCDH7 PE=1 SV=2 - [PCDH7_HUMAN]	O60245	N-Term(Diethyl(H)); S7(Hex); M11(Oxidation); M15(Oxidation); K19(Diethyl(H))	HCD	0.915401	1	0	1	1	Heavy		942.863	4.21598e-92	5.17298e-95	0	7.67247	3	787.059	2359.16	0.343327	71.8229
ENLQPNSPVGMVTVMDADK	Protocadherin-7 OS=Homo sapiens GN=PCDH7 PE=1 SV=2 - [PCDH7_HUMAN]	O60245	N-Term(Diethyl(H)); M11(Oxidation); T13(Hex); M15(Oxidation); K19(Diethyl(H))	ETciD	0.971745	1	0	1	1	Heavy	1.8172				0	4.97034	2	1180.09	2359.16	0.426642	71.3817
ENLQPNSPVGMVTVMDADK	Protocadherin-7 OS=Homo sapiens GN=PCDH7 PE=1 SV=2 - [PCDH7_HUMAN]	O60245	N-Term(Diethyl(H)); S7(Hex); M11(Oxidation); M15(Oxidation); K19(Diethyl(H))	HCD	0.971745	1	0	1	1	Heavy		516.831	1.71571e-49	2.07462e-52	0	4.97034	2	1180.09	2359.16	0.426642	71.3939
ENLQPNSPVGMVTVMDADK	Protocadherin-7 OS=Homo sapiens GN=PCDH7 PE=1 SV=2 - [PCDH7_HUMAN]	O60245	N-Term(Diethyl(H)); M11(Oxidation); T13(Hex); M15(Oxidation); K19(Diethyl(H))	HCD	0.960686	1	0	1	1	Heavy		482.108	5.52035e-46	6.15424e-49	0	3.37223	2	1180.09	2359.16	0.840586	71.9525
ENLQPNSPVGMVTVMDADKG	Protocadherin-7 OS=Homo sapiens GN=PCDH7 PE=1 SV=2 - [PCDH7_HUMAN]	O60245	N-Term(Diethyl); T13(Hex); K19(Diethyl)	ETciD	0.661239	1	0	1	1	Light	2.52471				1	18.6048	3	792.727	2376.17	0.0417989	71.0322
ENLQPNSPVGMVTVMDADKG	Protocadherin-7 OS=Homo sapiens GN=PCDH7 PE=1 SV=2 - [PCDH7_HUMAN]	O60245	N-Term(Diethyl(H)); M11(Oxidation); T13(Hex); K19(Diethyl(H))	ETciD	0.700706	1	0	1	1	Heavy	2.21794				1	7.80988	3	800.734	2400.19	-0.47824	62.2741
ENLQPNSPVGMVTVMDADKGR	Protocadherin-7 OS=Homo sapiens GN=PCDH7 PE=1 SV=2 - [PCDH7_HUMAN]	O60245	N-Term(Diethyl(H)); T13(Hex); K19(Diethyl(H))	ETciD	1.24065	1	0	1	1	Heavy	4.46171				1	3.49874	3	847.437	2540.3	-0.0689416	87.7333
ENLQPNSPVGMVTVMDADKGR	Protocadherin-7 OS=Homo sapiens GN=PCDH7 PE=1 SV=2 - [PCDH7_HUMAN]	O60245	N-Term(Diethyl(H)); T13(Hex); K19(Diethyl(H))	HCD	1.24065	1	0	1	1	Heavy		938.996	1.37732e-91	1.26013e-94	1	3.49874	3	847.437	2540.3	-0.0689416	87.7459
ENLQPNSPVGMVTVMDADKGR	Protocadherin-7 OS=Homo sapiens GN=PCDH7 PE=1 SV=2 - [PCDH7_HUMAN]	O60245	N-Term(Diethyl(H)); T13(Hex); M15(Oxidation); K19(Diethyl(H))	ETciD	1.14525	1	0	1	1	Heavy	4.70338				1	8.39301	3	852.768	2556.29	-0.753463	73.7466
ENLQPNSPVGMVTVMDADKGR	Protocadherin-7 OS=Homo sapiens GN=PCDH7 PE=1 SV=2 - [PCDH7_HUMAN]	O60245	N-Term(Diethyl(H)); S7(Hex); M11(Oxidation); K19(Diethyl(H))	HCD	1.14525	1	0	1	1	Heavy		340.743	9.72532e-32	8.42749e-35	1	8.39301	3	852.768	2556.29	-0.753463	73.7568
ENLQPNSPVGMVTVMDADKGR	Protocadherin-7 OS=Homo sapiens GN=PCDH7 PE=1 SV=2 - [PCDH7_HUMAN]	O60245	N-Term(Diethyl(H)); M11(Oxidation); T13(Hex); K19(Diethyl(H))	ETciD	1.16176	1	0	1	1	Heavy	4.58505				1	6.8319	3	852.769	2556.29	0.607495	75.1306
ENLQPNSPVGMVTVMDADKGR	Protocadherin-7 OS=Homo sapiens GN=PCDH7 PE=1 SV=2 - [PCDH7_HUMAN]	O60245	N-Term(Diethyl(H)); S7(Hex); M11(Oxidation); K19(Diethyl(H))	HCD	1.16176	1	0	1	1	Heavy		777.192	2.25277e-75	1.90912e-78	1	6.8319	3	852.769	2556.29	0.607495	75.1448
ENLQPNSPVGMVTVMDADKGR	Protocadherin-7 OS=Homo sapiens GN=PCDH7 PE=1 SV=2 - [PCDH7_HUMAN]	O60245	N-Term(Diethyl(H)); M11(Oxidation); T13(Hex); M15(Oxidation); K19(Diethyl(H))	ETciD	1.22123	1	0	1	1	Heavy	3.39881				1	4.97698	3	858.1	2572.29	0.136576	64.4699
ENLQPNSPVGMVTVMDADKGR	Protocadherin-7 OS=Homo sapiens GN=PCDH7 PE=1 SV=2 - [PCDH7_HUMAN]	O60245	N-Term(Diethyl(H)); S7(Hex); M11(Oxidation); M15(Oxidation); K19(Diethyl(H))	HCD	1.22123	1	0	1	1	Heavy		531.86	7.06424e-51	6.51683e-54	1	4.97698	3	858.1	2572.29	0.136576	64.4839
ENLQPNSPVGMVTVMDADKGR	Protocadherin-7 OS=Homo sapiens GN=PCDH7 PE=1 SV=2 - [PCDH7_HUMAN]	O60245	N-Term(Diethyl(H)); M11(Oxidation); T13(Hex); M15(Oxidation); K19(Diethyl(H))	ETciD	1.18071	1	0	1	1	Heavy	5.45824				1	6.79916	3	858.1	2572.29	0.421312	65.2334
ENLQPNSPVGMVTVMDADKGR	Protocadherin-7 OS=Homo sapiens GN=PCDH7 PE=1 SV=2 - [PCDH7_HUMAN]	O60245	N-Term(Diethyl(H)); S7(Hex); M11(Oxidation); M15(Oxidation); K19(Diethyl(H))	HCD	1.18071	1	0	1	1	Heavy		678.54	1.53689e-65	1.39971e-68	1	6.79916	3	858.1	2572.29	0.421312	65.2458
LLPTATDR	Protocadherin-7 OS=Homo sapiens GN=PCDH7 PE=1 SV=2 - [PCDH7_HUMAN]	O60245	N-Term(Diethyl(H)); T4(Hex)	HCD	6293	1	0	1	1	Heavy		291.856	2.59851e-26	6.52235e-30	0	10.3479	2	554.818	1108.63	-0.0414417	50.5469
LLPTATDRDFGR	Protocadherin-7 OS=Homo sapiens GN=PCDH7 PE=1 SV=2 - [PCDH7_HUMAN]	O60245	N-Term(Diethyl(H)); T4(Hex)	ETciD	2.8404	1	0	1	1	Heavy	2.3619				1	47.4849	3	528.62	1583.85	0.268608	65.8362
SPVGMVTVMDADK	Protocadherin-7 OS=Homo sapiens GN=PCDH7 PE=1 SV=2 - [PCDH7_HUMAN]	O60245	N-Term(Diethyl(H)); M5(Oxidation); T7(Hex); M9(Oxidation); K13(Diethyl(H))	ETciD	0.993683	1	0	1	1	Heavy	1.92122				0	9.89699	2	832.423	1663.84	0.107875	54.8566
SPVGMVTVMDADK	Protocadherin-7 OS=Homo sapiens GN=PCDH7 PE=1 SV=2 - [PCDH7_HUMAN]	O60245	N-Term(Diethyl(H)); M5(Oxidation); T7(Hex); M9(Oxidation); K13(Diethyl(H))	HCD	0.993683	1	0	1	1	Heavy		324.827	2.29551e-29	3.29058e-33	0	9.89699	2	832.423	1663.84	0.107875	54.87
SPVGMVTVMDADKGR	Protocadherin-7 OS=Homo sapiens GN=PCDH7 PE=1 SV=2 - [PCDH7_HUMAN]	O60245	N-Term(Diethyl(H)); M5(Oxidation); T7(Hex); K13(Diethyl(H))	ETciD	1.42135	1	0	1	1	Heavy	2.2011				1	22.635	3	620.994	1860.97	-0.200288	59.1971
SSQAILR	Protocadherin-7 OS=Homo sapiens GN=PCDH7 PE=1 SV=2 - [PCDH7_HUMAN]	O60245	N-Term(Diethyl(H)); S2(Hex)	HCD	1.14306	1	0	1	1	Heavy		227.699	5.64011e-21	1.69883e-23	0	20.7732	2	498.791	996.574	-1.26016	31.2083
SSQAILR	Protocadherin-7 OS=Homo sapiens GN=PCDH7 PE=1 SV=2 - [PCDH7_HUMAN]	O60245	N-Term(Diethyl(H)); S2(Hex)	HCD	1.07792	1	0	1	1	Heavy		238.762	4.49443e-22	1.32971e-24	0	25.4354	2	498.791	996.575	-0.525223	32.6526
SSQAILR	Protocadherin-7 OS=Homo sapiens GN=PCDH7 PE=1 SV=2 - [PCDH7_HUMAN]	O60245	N-Term(Diethyl(H)); S2(Hex)	HCD	1.10462	1	0	1	1	Heavy		262.406	2.03436e-24	5.74677e-27	0	17.0239	2	498.792	996.576	0.148471	31.7503
SSQAILR	Protocadherin-7 OS=Homo sapiens GN=PCDH7 PE=1 SV=2 - [PCDH7_HUMAN]	O60245	N-Term(Diethyl(H)); S2(Hex)	HCD	1.09906	1	0	1	1	Heavy		244.302	1.31452e-22	3.71333e-25	0	44.5804	2	498.792	996.576	0.148471	31.2386
SSQAILR	Protocadherin-7 OS=Homo sapiens GN=PCDH7 PE=1 SV=2 - [PCDH7_HUMAN]	O60245	N-Term(Diethyl(H)); S2(Hex)	HCD	1.14544	1	0	1	1	Heavy		258.796	4.68411e-24	1.31947e-26	0	16.4023	2	498.792	996.576	0.209716	33.2435
TLYLLPTATDR	Protocadherin-7 OS=Homo sapiens GN=PCDH7 PE=1 SV=2 - [PCDH7_HUMAN]	O60245	N-Term(Diethyl(H)); T7(Hex)	HCD	3.40682	1	0	1	1	Heavy		318.806	7.94779e-29	1.31651e-32	0	24.5666	2	743.416	1485.82	0.707384	93.0034
TVEENRPVGTLYLLPTATDR	Protocadherin-7 OS=Homo sapiens GN=PCDH7 PE=1 SV=2 - [PCDH7_HUMAN]	O60245	N-Term(Diethyl(H)); T16(Hex)	ETciD	1.65354	1	0	1	1	Heavy	2.81675				0	45.5806	3	823.109	2467.31	0.283102	90.272
TVEENRPVGTLYLLPTATDR	Protocadherin-7 OS=Homo sapiens GN=PCDH7 PE=1 SV=2 - [PCDH7_HUMAN]	O60245	N-Term(Diethyl(H)); T16(Hex)	HCD	1.65354	1	0	1	1	Heavy		328.935	1.90041e-29	1.27793e-33	0	45.5806	3	823.109	2467.31	0.283102	90.2811
TVEENRPVGTLYLLPTATDR	Protocadherin-7 OS=Homo sapiens GN=PCDH7 PE=1 SV=2 - [PCDH7_HUMAN]	O60245	N-Term(Diethyl(H)); T16(Hex)	ETciD	1.83537	1	0	1	1	Heavy	4.20084				0	36.1232	3	823.109	2467.31	0.431527	89.812
TVEENRPVGTLYLLPTATDR	Protocadherin-7 OS=Homo sapiens GN=PCDH7 PE=1 SV=2 - [PCDH7_HUMAN]	O60245	N-Term(Diethyl(H)); T16(Hex)	HCD	1.83537	1	0	1	1	Heavy		642.809	7.92746e-61	5.23679e-65	0	36.1232	3	823.109	2467.31	0.431527	89.8252
TVEENRPVGTLYLLPTATDRDFGR	Protocadherin-7 OS=Homo sapiens GN=PCDH7 PE=1 SV=2 - [PCDH7_HUMAN]	O60245	N-Term(Diethyl(H)); T16(Hex)	ETciD	3.00572	1	0	1	1	Heavy	5.27387				1	23.572	4	736.388	2942.53	0.418318	93.4577
TVMDADKGR	Protocadherin-7 OS=Homo sapiens GN=PCDH7 PE=1 SV=2 - [PCDH7_HUMAN]	O60245	N-Term(Diethyl(H)); T1(Hex); M3(Oxidation); K7(Diethyl(H))	ETciD	2.38353	1	0	1	1	Heavy	2.32565				1	41.8822	3	430.899	1290.68	-0.375502	18.8387
VTVMDADK	Protocadherin-7 OS=Homo sapiens GN=PCDH7 PE=1 SV=2 - [PCDH7_HUMAN]	O60245	N-Term(Diethyl(H)); T2(Hex); M4(Oxidation); K8(Diethyl(H))	HCD	0.512724	1	0	1	1	Heavy		257.961	6.84241e-23	1.59907e-26	0	52.4375	2	588.818	1176.63	0.378725	35.4966
VTVMDADKGR	Protocadherin-7 OS=Homo sapiens GN=PCDH7 PE=1 SV=2 - [PCDH7_HUMAN]	O60245	N-Term(Diethyl(H)); T2(Hex); M4(Oxidation); K8(Diethyl(H))	ETciD	0.611479	1	0	1	1	Heavy	2.73343				1	44.8692	3	463.922	1389.75	-0.172767	29.9013
YFLHTSTPLDYEATR	Protocadherin-7 OS=Homo sapiens GN=PCDH7 PE=1 SV=2 - [PCDH7_HUMAN]	O60245	N-Term(Diethyl(H)); T5(Hex)	ETciD	1.05952	1	0	1	1	Heavy	2.0462				0	57.7221	3	679.34	2036	0.181529	77.2416
YFLHTSTPLDYEATR	Protocadherin-7 OS=Homo sapiens GN=PCDH7 PE=1 SV=2 - [PCDH7_HUMAN]	O60245	N-Term(Diethyl(H)); T5(Hex)	HCD	1.05952	1	0	1	1	Heavy		375.671	1.56074e-35	2.70962e-38	0	57.7221	3	679.34	2036	0.181529	77.2552
ATDGGQPPRSSTAK	Protocadherin-9 OS=Homo sapiens GN=PCDH9 PE=1 SV=2 - [PCDH9_HUMAN]	Q9HC56	N-Term(Diethyl(H)); S10(Hex); S11(Hex); K14(Diethyl(H))	ETciD	0.995414	1	0	1	1	Heavy	3.43285				1	15.1017	3	606.318	1816.94	0.680031	18.6895
ATDGGQPPRSSTAK	Protocadherin-9 OS=Homo sapiens GN=PCDH9 PE=1 SV=2 - [PCDH9_HUMAN]	Q9HC56	N-Term(Diethyl(H)); S10(Hex); T12(Hex); K14(Diethyl(H))	HCD	0.995414	1	0	1	1	Heavy		299.39	7.49085e-28	1.15067e-30	1	15.1017	3	606.318	1816.94	0.680031	18.7006
SSTAILQVTVSDVNDNRPVFK	Protocadherin-9 OS=Homo sapiens GN=PCDH9 PE=1 SV=2 - [PCDH9_HUMAN]	Q9HC56	N-Term(Diethyl(H)); T9(Hex); S11(Hex); K21(Diethyl(H))	HCD	1.357	1	0	1	1	Heavy		362.372	5.59999e-34	5.79109e-37	0	9.50646	3	912.159	2734.46	0.72988	93.3577
YSTVGVITVTDADAGENK	Protocadherin-9 OS=Homo sapiens GN=PCDH9 PE=1 SV=2 - [PCDH9_HUMAN]	Q9HC56	N-Term(Diethyl); T8(Hex); K18(Diethyl)	ETciD	1.10284	1	0	1	1	Light	3.05425				0	3.33195	2	1057.54	2114.08	0.729612	78.6203
YSTVGVITVTDADAGENK	Protocadherin-9 OS=Homo sapiens GN=PCDH9 PE=1 SV=2 - [PCDH9_HUMAN]	Q9HC56	N-Term(Diethyl(H)); T10(Hex); K18(Diethyl(H))	ETciD	1.14754	1	0	1	1	Heavy	4.13263				0	6.28612	3	708.039	2122.1	0.123811	78.6993
YSTVGVITVTDADAGENK	Protocadherin-9 OS=Homo sapiens GN=PCDH9 PE=1 SV=2 - [PCDH9_HUMAN]	Q9HC56	N-Term(Diethyl(H)); T8(Hex); K18(Diethyl(H))	HCD	1.14754	1	0	1	1	Heavy		488.433	1.25947e-46	1.43448e-49	0	6.28612	3	708.039	2122.1	0.123811	78.7126
YSTVGVITVTDADAGENK	Protocadherin-9 OS=Homo sapiens GN=PCDH9 PE=1 SV=2 - [PCDH9_HUMAN]	Q9HC56	N-Term(Diethyl(H)); T10(Hex); K18(Diethyl(H))	ETciD	1.20687	1	0	1	1	Heavy	4.6131				0	14.5665	3	708.039	2122.1	0.382665	78.7195
YSTVGVITVTDADAGENK	Protocadherin-9 OS=Homo sapiens GN=PCDH9 PE=1 SV=2 - [PCDH9_HUMAN]	Q9HC56	N-Term(Diethyl(H)); T8(Hex); K18(Diethyl(H))	HCD	1.20687	1	0	1	1	Heavy		461.125	6.63685e-44	7.71727e-47	0	14.5665	3	708.039	2122.1	0.382665	78.7326
YSTVGVITVTDADAGENK	Protocadherin-9 OS=Homo sapiens GN=PCDH9 PE=1 SV=2 - [PCDH9_HUMAN]	Q9HC56	N-Term(Diethyl(H)); T3(Hex); K18(Diethyl(H))	HCD	0.795865	1	0	1	1	Heavy		416.534	1.38835e-39	2.22137e-42	0	10.4742	2	1061.56	2122.1	0.619095	77.5089
YSTVGVITVTDADAGENK	Protocadherin-9 OS=Homo sapiens GN=PCDH9 PE=1 SV=2 - [PCDH9_HUMAN]	Q9HC56	N-Term(Diethyl(H)); T8(Hex); K18(Diethyl(H))	ETciD	1.1094	1	0	1	1	Heavy	2.84485				0	4.38323	2	1061.56	2122.1	0.734141	78.7555
YSTVGVITVTDADAGENK	Protocadherin-9 OS=Homo sapiens GN=PCDH9 PE=1 SV=2 - [PCDH9_HUMAN]	Q9HC56	N-Term(Diethyl(H)); T10(Hex); K18(Diethyl(H))	HCD	1.1094	1	0	1	1	Heavy		724.818	2.74333e-70	3.29727e-73	0	4.38323	2	1061.56	2122.1	0.734141	78.768
YSTVGVITVTDADAGENK	Protocadherin-9 OS=Homo sapiens GN=PCDH9 PE=1 SV=2 - [PCDH9_HUMAN]	Q9HC56	N-Term(Diethyl(H)); T8(Hex); K18(Diethyl(H))	HCD	1.10284	1	0	1	1	Heavy		649.36	9.64182e-63	1.15887e-65	0	5.33818	2	1061.56	2122.1	0.734141	78.7061
YSTVGVITVTDADAGENK	Protocadherin-9 OS=Homo sapiens GN=PCDH9 PE=1 SV=2 - [PCDH9_HUMAN]	Q9HC56	N-Term(Diethyl); T3(Hex); T8(Hex); K18(Diethyl)	ETciD	1.10011	1	0	1	1	Light	4.35075				0	0	3	759.38	2276.13	-1.19106	73.6591
YSTVGVITVTDADAGENK	Protocadherin-9 OS=Homo sapiens GN=PCDH9 PE=1 SV=2 - [PCDH9_HUMAN]	Q9HC56	N-Term(Diethyl); T3(Hex); T8(Hex); K18(Diethyl)	ETciD	1.12984	1	0	1	1	Light	2.3182				0	3.75644	2	1138.57	2276.13	-0.756108	73.6418
YSTVGVITVTDADAGENK	Protocadherin-9 OS=Homo sapiens GN=PCDH9 PE=1 SV=2 - [PCDH9_HUMAN]	Q9HC56	N-Term(Diethyl); T3(Hex); T8(Hex); K18(Diethyl)	ETciD	1.09618	1	0	1	1	Light	1.74167				0	0	2	1138.57	2276.13	-0.327062	73.8371
YSTVGVITVTDADAGENK	Protocadherin-9 OS=Homo sapiens GN=PCDH9 PE=1 SV=2 - [PCDH9_HUMAN]	Q9HC56	N-Term(Diethyl(H)); T3(Hex); T8(Hex); K18(Diethyl(H))	HCD	1.10011	1	0	1	1	Heavy		392.769	4.82539e-37	5.2852e-40	0	55.7322	3	762.056	2284.15	-0.886172	73.6135
YSTVGVITVTDADAGENK	Protocadherin-9 OS=Homo sapiens GN=PCDH9 PE=1 SV=2 - [PCDH9_HUMAN]	Q9HC56	N-Term(Diethyl(H)); T3(Hex); T10(Hex); K18(Diethyl(H))	HCD	1.12984	1	0	1	1	Heavy		894.058	3.63793e-87	3.92865e-90	0	3.93847	2	1142.58	2284.15	-0.53291	73.7725
YSTVGVITVTDADAGENK	Protocadherin-9 OS=Homo sapiens GN=PCDH9 PE=1 SV=2 - [PCDH9_HUMAN]	Q9HC56	N-Term(Diethyl(H)); T3(Hex); T8(Hex); K18(Diethyl(H))	ETciD	1.11496	1	0	1	1	Heavy	3.79929				0	16.9985	3	762.056	2284.15	-0.405191	73.8605
YSTVGVITVTDADAGENK	Protocadherin-9 OS=Homo sapiens GN=PCDH9 PE=1 SV=2 - [PCDH9_HUMAN]	Q9HC56	N-Term(Diethyl(H)); T3(Hex); T8(Hex); K18(Diethyl(H))	HCD	1.11496	1	0	1	1	Heavy		558.118	1.4608e-53	1.54255e-56	0	16.9985	3	762.056	2284.15	-0.405191	73.874
ATSELSHSAK	Receptor-type tyrosine-protein phosphatase zeta OS=Homo sapiens GN=PTPRZ1 PE=1 SV=4 - [PTPRZ_HUMAN]	P23471	N-Term(Diethyl); S8(Hex); K10(Diethyl)	ETciD	1.11995	1	0	1	1	Light	2.08612				0	25.6454	3	435.57	1304.69	0.0278552	21.9455
ATSELSHSAK	Receptor-type tyrosine-protein phosphatase zeta OS=Homo sapiens GN=PTPRZ1 PE=1 SV=4 - [PTPRZ_HUMAN]	P23471	N-Term(Diethyl(H)); S8(Hex); K10(Diethyl(H))	HCD	1.11995	1	0	1	1	Heavy		413.372	1.70209e-39	4.60025e-42	0	37.5673	3	438.245	1312.72	-0.285997	21.9522
LSETIVPPINTATVPDNEDGEAK	SUN domain-containing ossification factor OS=Homo sapiens GN=SUCO PE=2 SV=1 - [SUCO_HUMAN]	Q9UBS9	N-Term(Diethyl); T11(Hex); K23(Diethyl)	ETciD	0.692524	1	0	1	1	Light	2.51479				0	5.07068	3	895.464	2684.38	0.873225	91.9934
LSETIVPPINTATVPDNEDGEAK	SUN domain-containing ossification factor OS=Homo sapiens GN=SUCO PE=2 SV=1 - [SUCO_HUMAN]	Q9UBS9	N-Term(Diethyl(H)); T4(Hex); K23(Diethyl(H))	HCD	0.692524	1	0	1	1	Heavy		450.53	1.07642e-42	8.85214e-46	0	12.4342	3	898.14	2692.41	0.989714	92.0169
LSETIVPPINTATVPDNEDGEAK	SUN domain-containing ossification factor OS=Homo sapiens GN=SUCO PE=2 SV=1 - [SUCO_HUMAN]	Q9UBS9	N-Term(Diethyl(H)); T4(Hex); T11(Hex); K23(Diethyl(H))	HCD	0.589204	1	0	1	1	Heavy		333.638	6.10952e-31	4.32685e-34	0	12.7381	3	952.158	2854.46	1.28701	89.3239
LSETIVPPINTATVPDNEDGEAK	SUN domain-containing ossification factor OS=Homo sapiens GN=SUCO PE=2 SV=1 - [SUCO_HUMAN]	Q9UBS9	N-Term(Diethyl(H)); S2(Hex); T4(Hex); T11(Hex); K23(Diethyl(H))	HCD	0.566402	1	0	1	1	Heavy		320.377	1.33505e-29	9.16928e-33	0	8.21613	3	1006.18	3016.51	0.823952	86.0863
LSETIVPPINTATVPDNEDGEAK	SUN domain-containing ossification factor OS=Homo sapiens GN=SUCO PE=2 SV=1 - [SUCO_HUMAN]	Q9UBS9	N-Term(Diethyl(H)); S2(Hex); T4(Hex); T11(Hex); K23(Diethyl(H))	HCD	0.56583	1	0	1	1	Heavy		272.858	7.72156e-25	5.17878e-28	0	8.46122	3	1006.18	3016.51	1.61306	86.4297
ISYVISIK	Sushi domain-containing protein 1 OS=Homo sapiens GN=SUSD1 PE=1 SV=1 - [SUSD1_HUMAN]	Q6UWL2	N-Term(Diethyl(H)); S6(Hex); K8(Diethyl(H))	HCD	1148.99	1	0	1	1	Heavy		235.409	4.80685e-22	2.87835e-24	0	41.706	2	602.887	1204.77	0.394749	85.9828
ISYVISIK	Sushi domain-containing protein 1 OS=Homo sapiens GN=SUSD1 PE=1 SV=1 - [SUSD1_HUMAN]	Q6UWL2	N-Term(Diethyl(H)); S6(Hex); K8(Diethyl(H))	HCD	850.787	1	0	1	1	Heavy		312.553	9.27702e-30	5.5551e-32	0	39.1129	2	602.887	1204.77	0.496072	86.2852
TGSVTTTYCCNQDHCNK	TGF-beta receptor type-1 OS=Homo sapiens GN=TGFBR1 PE=1 SV=1 - [TGFR1_HUMAN]	P36897	N-Term(Diethyl); T1(Hex); S3(Hex); C9(Carbamidomethyl); C10(Carbamidomethyl); C15(Carbamidomethyl); K17(Diethyl)	ETciD	0.526597	1	0	1	1	Light	2.87259				0	10.1797	3	828.019	2482.04	0.427296	35.1663
TGSVTTTYCCNQDHCNK	TGF-beta receptor type-1 OS=Homo sapiens GN=TGFBR1 PE=1 SV=1 - [TGFR1_HUMAN]	P36897	N-Term(Diethyl(H)); T6(Hex); T7(Hex); C9(Carbamidomethyl); C10(Carbamidomethyl); C15(Carbamidomethyl); K17(Diethyl(H))	HCD	0.526597	1	0	1	1	Heavy		226.883	2.07008e-21	2.04959e-23	0	18.7184	3	830.695	2490.07	0.407619	35.1943
DKELGCSK	Thioredoxin domain-containing protein 16 OS=Homo sapiens GN=TXNDC16 PE=2 SV=4 - [TXD16_HUMAN]	Q9P2K2	N-Term(Diethyl); K2(Diethyl); C6(Carbamidomethyl); S7(Hex); K8(Diethyl)	ETciD	0.489722	1	0	1	1	Light	1.61752				1	26.8405	2	633.844	1266.68	-3.93103	30.4384
DKELGCSK	Thioredoxin domain-containing protein 16 OS=Homo sapiens GN=TXNDC16 PE=2 SV=4 - [TXD16_HUMAN]	Q9P2K2	N-Term(Diethyl); K2(Diethyl); C6(Carbamidomethyl); S7(Hex); K8(Diethyl)	ETciD	0.52425	1	0	1	1	Light	1.86173				1	41.0998	3	422.899	1266.68	-2.97794	30.5004
SSYVLHGER	Thyrotropin-releasing hormone-degrading ectoenzyme OS=Homo sapiens GN=TRHDE PE=2 SV=1 - [TRHDE_HUMAN]	Q9UKU6	N-Term(Diethyl); S1(Hex)	ETciD	0.332176	1	0	1	1	Light	2.60138				0	32.5787	3	422.551	1265.64	0.293998	30.2485
DKISSSSFIEPIFPTSK	Transmembrane and TPR repeat-containing protein 3 OS=Homo sapiens GN=TMTC3 PE=1 SV=2 - [TMTC3_HUMAN]	Q6ZXV5	N-Term(Diethyl); K2(Diethyl); T15(Hex); K17(Diethyl)	ETciD	0.491399	1	0	1	1	Light	1.88747				1	18.4193	3	738.412	2213.22	0.715102	104.035
DKISSSSFIEPIFPTSK	Transmembrane and TPR repeat-containing protein 3 OS=Homo sapiens GN=TMTC3 PE=1 SV=2 - [TMTC3_HUMAN]	Q6ZXV5	N-Term(Diethyl); K2(Diethyl); S6(Hex); S7(Hex); K17(Diethyl)	ETciD	0.466576	1	0	1	1	Light	2.06473				1	10.9996	3	792.431	2375.28	1.63073	96.8316
VLTCTGAPWPCR	Transmembrane protein 8A OS=Homo sapiens GN=TMEM8A PE=1 SV=3 - [TMM8A_HUMAN]	Q9HCN3	N-Term(Diethyl(H)); T3(Hex); C4(Carbamidomethyl); C11(Carbamidomethyl)	HCD	6537.25	1	0	1	1	Heavy		225.383	8.97659e-21	2.89567e-23	0	5.72652	2	820.404	1639.8	0.476741	75.6265
AITTSLTTK	UDP-glucose:glycoprotein glucosyltransferase 1 OS=Homo sapiens GN=UGGT1 PE=1 SV=3 - [UGGG1_HUMAN]	Q9NYU2	N-Term(Diethyl(H)); T3(Hex); K9(Diethyl(H))	HCD	0.447696	1	0	1	1	Heavy		258.846	2.3609e-24	1.30436e-26	0	46.3137	2	609.376	1217.75	-0.126712	58.6764
SSFSEHKPR	UPF0606 protein KIAA1549 OS=Homo sapiens GN=KIAA1549 PE=1 SV=4 - [K1549_HUMAN]	Q9HCM3	N-Term(Diethyl(H)); S4(Hex); K7(Diethyl(H))	ETciD	0.92584	1	0	1	1	Heavy	2.53162				0	40.3061	3	452.917	1356.74	-0.181656	22.8719
SSFSEHKPR	UPF0606 protein KIAA1549 OS=Homo sapiens GN=KIAA1549 PE=1 SV=4 - [K1549_HUMAN]	Q9HCM3	N-Term(Diethyl(H)); S4(Hex); K7(Diethyl(H))	HCD	0.92584	1	0	1	1	Heavy		304.998	1.13575e-28	3.16365e-31	0	40.3061	3	452.917	1356.74	-0.181656	22.8817
SSFSEHKPR	UPF0606 protein KIAA1549 OS=Homo sapiens GN=KIAA1549 PE=1 SV=4 - [K1549_HUMAN]	Q9HCM3	N-Term(Diethyl(H)); S2(Hex); S4(Hex); K7(Diethyl(H))	ETciD	0.988328	1	0	1	1	Heavy	2.26097				0	47.9412	3	506.935	1518.79	-0.0404447	21.6142
SSFSEHKPR	UPF0606 protein KIAA1549 OS=Homo sapiens GN=KIAA1549 PE=1 SV=4 - [K1549_HUMAN]	Q9HCM3	N-Term(Diethyl(H)); S2(Hex); S4(Hex); K7(Diethyl(H))	HCD	0.988328	1	0	1	1	Heavy		355.725	1.14269e-33	2.67609e-36	0	47.9412	3	506.935	1518.79	-0.0404447	21.6283

## Sheet: Exp4
Sequence	Protein Descriptions	Protein Group Accessions	Modifications	Activation Type	Ratio (Heavy/Light)	ΔScore	ΔCn	Rank	Search Engine Rank	Quan Channel	XCorr	# Missed Cleavages	Isolation Interference [%]	Charge	m/z [Da]	MH+ [Da]	ΔM [ppm]	RT [min]
ELEEIVQPIISK	78 kDa glucose-regulated protein OS=Homo sapiens GN=HSPA5 PE=1 SV=2 - [GRP78_HUMAN]	P11021	N-Term(Diethyl); S11(Hex); K12(Diethyl)	HCD	0.271079	1	0	1	1	Light	2.85892	0	19.2184	2	836.488	1671.97	0.807358	61.8474
FDSSAPFLSSTTV	Cadherin EGF LAG seven-pass G-type receptor 1 OS=Homo sapiens GN=CELSR1 PE=1 SV=1 - [CELR1_HUMAN]	Q9NYQ6	N-Term(Diethyl(H)); S10(Hex); T11(Hex)	ETciD	1.75977	1	0	1	1	Heavy	1.8611	0	10.1301	2	871.919	1742.83	0.484473	60.2223
FDSSAPFLSSTTV	Cadherin EGF LAG seven-pass G-type receptor 1 OS=Homo sapiens GN=CELSR1 PE=1 SV=1 - [CELR1_HUMAN]	Q9NYQ6	N-Term(Diethyl(H)); S9(Hex)	ETciD	1.80785	1	0	1	1	Heavy	1.75535	0	25.9615	2	790.892	1580.78	0.281948	60.2796
FDSSAPFLSSTTV	Cadherin EGF LAG seven-pass G-type receptor 1 OS=Homo sapiens GN=CELSR1 PE=1 SV=1 - [CELR1_HUMAN]	Q9NYQ6	N-Term(Diethyl(H)); S9(Hex); S10(Hex)	ETciD	1.76301	1	0	1	1	Heavy	1.98328	0	4.23557	2	871.919	1742.83	0.624555	59.9691
VTATDPDEGTNAQIMY	Cadherin EGF LAG seven-pass G-type receptor 2 OS=Homo sapiens GN=CELSR2 PE=2 SV=1 - [CELR2_HUMAN]	Q9HCU4	N-Term(Diethyl); T4(Hex); T10(Hex); M15(Oxidation)	ETciD	0.443581	1	0	1	1	Light	2.17237	0	12.5425	2	1061.47	2121.93	1.13223	42.6014
VTATDPDEGTNAQIMY	Cadherin EGF LAG seven-pass G-type receptor 2 OS=Homo sapiens GN=CELSR2 PE=2 SV=1 - [CELR2_HUMAN]	Q9HCU4	N-Term(Diethyl); T4(Hex); T10(Hex); M15(Oxidation)	ETciD	0.490302	1	0	1	1	Light	2.73333	0	5.63202	3	707.981	2121.93	0.953312	42.6186
VTATDPDEGTNAQIMY	Cadherin EGF LAG seven-pass G-type receptor 2 OS=Homo sapiens GN=CELSR2 PE=2 SV=1 - [CELR2_HUMAN]	Q9HCU4	N-Term(Diethyl); T2(Hex); M15(Oxidation)	ETciD	0.387506	1	0	1	1	Light	2.85595	0	72.3601	3	653.963	1959.87	-0.0432581	42.6806
VTATDPDEGTNAQIMY	Cadherin EGF LAG seven-pass G-type receptor 2 OS=Homo sapiens GN=CELSR2 PE=2 SV=1 - [CELR2_HUMAN]	Q9HCU4	N-Term(Diethyl); T4(Hex); T10(Hex); M15(Oxidation)	ETciD	0.416107	1	0	1	1	Light	3.46694	0	32.4098	3	707.981	2121.93	0.176684	42.1964
VTATDPDEGTNAQIMY	Cadherin EGF LAG seven-pass G-type receptor 2 OS=Homo sapiens GN=CELSR2 PE=2 SV=1 - [CELR2_HUMAN]	Q9HCU4	N-Term(Diethyl); T2(Hex); M15(Oxidation)	ETciD	0.424181	1	0	1	1	Light	3.98909	0	30.11	3	653.963	1959.88	0.797586	42.2484
VTATDPDEGTNAQIMY	Cadherin EGF LAG seven-pass G-type receptor 2 OS=Homo sapiens GN=CELSR2 PE=2 SV=1 - [CELR2_HUMAN]	Q9HCU4	N-Term(Diethyl); T4(Hex); T10(Hex)	ETciD	0.469577	1	0	1	1	Light	1.83591	0	7.15088	2	1053.47	2105.93	0.581105	47.3575
LNEDAAVGTSVVTVSAVDR	Cadherin EGF LAG seven-pass G-type receptor 2 OS=Homo sapiens GN=CELSR2 PE=2 SV=1 - [CELR2_HUMAN]	Q9HCU4	N-Term(Diethyl); S10(Hex); S15(Hex)	HCD	0.816805	1	0	1	1	Light	3.31501	0	43.1193	2	1142.08	2283.15	0.751951	46.2302
LNEDAAVGTSVVTVSAVDR	Cadherin EGF LAG seven-pass G-type receptor 2 OS=Homo sapiens GN=CELSR2 PE=2 SV=1 - [CELR2_HUMAN]	Q9HCU4	N-Term(Diethyl); T9(Hex); T13(Hex)	HCD	0.900584	1	0	1	1	Light	2.98832	0	39.5252	3	761.72	2283.15	0.692596	46.2479
LNEDAAVGTSVVTVSAVDR	Cadherin EGF LAG seven-pass G-type receptor 2 OS=Homo sapiens GN=CELSR2 PE=2 SV=1 - [CELR2_HUMAN]	Q9HCU4	N-Term(Diethyl); S10(Hex); S15(Hex)	HCD	0.825153	1	0	1	1	Light	4.00617	0	31.5968	2	1142.08	2283.15	0.217293	45.715
VTATDPDEGTNAQIMY	Cadherin EGF LAG seven-pass G-type receptor 2 OS=Homo sapiens GN=CELSR2 PE=2 SV=1 - [CELR2_HUMAN]	Q9HCU4	N-Term(Diethyl); T4(Hex); T10(Hex); M15(Oxidation)	HCD	0.490302	1	0	1	1	Light	3.00036	0	5.63202	3	707.981	2121.93	0.953312	42.6301
VTATDPDEGTNAQIMY	Cadherin EGF LAG seven-pass G-type receptor 2 OS=Homo sapiens GN=CELSR2 PE=2 SV=1 - [CELR2_HUMAN]	Q9HCU4	N-Term(Diethyl); T4(Hex); T10(Hex); M15(Oxidation)	HCD	0.416107	1	0	1	1	Light	2.88506	0	32.4098	3	707.981	2121.93	0.176684	42.2111
VTATDPDEGTNAQIMY	Cadherin EGF LAG seven-pass G-type receptor 2 OS=Homo sapiens GN=CELSR2 PE=2 SV=1 - [CELR2_HUMAN]	Q9HCU4	N-Term(Diethyl); T4(Hex); M15(Oxidation)	HCD	0.424181	1	0	1	1	Light	4.28372	0	30.11	3	653.963	1959.88	0.797586	42.2574
TAQEPDTFMEQK	Cadherin-1 OS=Homo sapiens GN=CDH1 PE=1 SV=3 - [CADH1_HUMAN]	P12830	N-Term(Diethyl); T1(Hex); M9(Oxidation); K12(Diethyl)	ETciD	0.608731	1	0	1	1	Light	2.30262	0	0	2	857.909	1714.81	0.439595	30.5623
TAQEPDTFMEQK	Cadherin-1 OS=Homo sapiens GN=CDH1 PE=1 SV=3 - [CADH1_HUMAN]	P12830	N-Term(Diethyl); T1(Hex); M9(Oxidation); K12(Diethyl)	ETciD	0.619715	1	0	1	1	Light	3.85366	0	1.87811	3	572.275	1714.81	0.324975	30.6383
TAQEPDTFMEQK	Cadherin-1 OS=Homo sapiens GN=CDH1 PE=1 SV=3 - [CADH1_HUMAN]	P12830	N-Term(Diethyl); T1(Hex); K12(Diethyl)	ETciD	0.652013	1	0	1	1	Light	2.58876	0	23.5977	2	849.911	1698.81	0.181005	40.8063
TAQEPDTFMEQK	Cadherin-1 OS=Homo sapiens GN=CDH1 PE=1 SV=3 - [CADH1_HUMAN]	P12830	N-Term(Diethyl); T1(Hex); M9(Oxidation); K12(Diethyl)	ETciD	0.70431	1	0	1	1	Light	2.24137	0	22.9069	2	857.908	1714.81	-0.201078	29.9091
TAQEPDTFMEQK	Cadherin-1 OS=Homo sapiens GN=CDH1 PE=1 SV=3 - [CADH1_HUMAN]	P12830	N-Term(Diethyl); T1(Hex); M9(Oxidation); K12(Diethyl)	HCD	0.619715	1	0	1	1	Light	4.55269	0	1.87811	3	572.275	1714.81	0.324975	30.652
GSVMEGALPGTSVMEVTATDADDDVNTY	Cadherin-1 OS=Homo sapiens GN=CDH1 PE=1 SV=3 - [CADH1_HUMAN]	P12830	N-Term(Diethyl(H)); M4(Oxidation); M14(Oxidation); T17(Hex); T19(Hex)	HCD	2.67454	1	0	1	1	Heavy	3.10712	0	24.6485	3	1087.81	3261.41	-0.387058	53.7954
DMGGHMGGLSGTTK	Cadherin-11 OS=Homo sapiens GN=CDH11 PE=1 SV=2 - [CAD11_HUMAN]	P55287	N-Term(Diethyl); M2(Oxidation); M6(Oxidation); S10(Hex); T12(Hex); K14(Diethyl)	ETciD	0.407335	1	0	1	1	Light	4.6406	0	8.44884	3	606.278	1816.82	0.687128	18.4791
DMGGHMGGLSGTTK	Cadherin-11 OS=Homo sapiens GN=CDH11 PE=1 SV=2 - [CAD11_HUMAN]	P55287	N-Term(Diethyl); M2(Oxidation); M6(Oxidation); S10(Hex); T12(Hex); K14(Diethyl)	ETciD	0.452855	1	0	1	1	Light	2.62762	0	10.8734	2	908.913	1816.82	0.123422	18.5782
DMGGHMGGLSGTTK	Cadherin-11 OS=Homo sapiens GN=CDH11 PE=1 SV=2 - [CAD11_HUMAN]	P55287	N-Term(Diethyl); M2(Oxidation); S10(Hex); T12(Hex); K14(Diethyl)	ETciD	0.487436	1	0	1	1	Light	4.55187	0	17.9437	3	600.946	1800.82	-0.164688	24.2754
DMGGHMGGLSGTTK	Cadherin-11 OS=Homo sapiens GN=CDH11 PE=1 SV=2 - [CAD11_HUMAN]	P55287	N-Term(Diethyl); M6(Oxidation); S10(Hex); T12(Hex); K14(Diethyl)	ETciD	0.435194	1	0	1	1	Light	4.78675	0	0.953537	3	600.946	1800.82	0.343706	24.6919
DMGGHMGGLSGTTK	Cadherin-11 OS=Homo sapiens GN=CDH11 PE=1 SV=2 - [CAD11_HUMAN]	P55287	N-Term(Diethyl); M6(Oxidation); S10(Hex); T12(Hex); K14(Diethyl)	ETciD	0.399644	1	0	1	1	Light	2.3513	0	16.6672	2	900.916	1800.83	0.690101	24.7605
DMGGHMGGLSGTTK	Cadherin-11 OS=Homo sapiens GN=CDH11 PE=1 SV=2 - [CAD11_HUMAN]	P55287	N-Term(Diethyl); S10(Hex); T12(Hex); K14(Diethyl)	ETciD	0.479755	1	0	1	1	Light	2.94592	0	12.4285	2	892.919	1784.83	0.993364	32.7522
DMGGHMGGLSGTTK	Cadherin-11 OS=Homo sapiens GN=CDH11 PE=1 SV=2 - [CAD11_HUMAN]	P55287	N-Term(Diethyl); M2(Oxidation); M6(Oxidation); S10(Hex); T12(Hex); K14(Diethyl)	ETciD	0.448003	1	0	1	1	Light	2.76369	0	4.08959	2	908.913	1816.82	0.0562334	18.1157
DMGGHMGGLSGTTK	Cadherin-11 OS=Homo sapiens GN=CDH11 PE=1 SV=2 - [CAD11_HUMAN]	P55287	N-Term(Diethyl); M2(Oxidation); S10(Hex); T12(Hex); K14(Diethyl)	ETciD	0.473785	1	0	1	1	Light	4.56793	0	12.4771	3	600.946	1800.82	0.0386698	23.7045
DMGGHMGGLSGTTK	Cadherin-11 OS=Homo sapiens GN=CDH11 PE=1 SV=2 - [CAD11_HUMAN]	P55287	N-Term(Diethyl); M6(Oxidation); S10(Hex); T12(Hex); K14(Diethyl)	ETciD	0.444491	1	0	1	1	Light	4.98551	0	11.55	3	600.946	1800.82	0.140348	24.1507
DMGGHMGGLSGTTK	Cadherin-11 OS=Homo sapiens GN=CDH11 PE=1 SV=2 - [CAD11_HUMAN]	P55287	N-Term(Diethyl); S10(Hex); T12(Hex); K14(Diethyl)	ETciD	0.440306	1	0	1	1	Light	4.03735	0	13.4716	3	595.615	1784.83	0.199308	32.0327
SNVGTSVIQVTASDADDPTYGNSAK	Cadherin-11 OS=Homo sapiens GN=CDH11 PE=1 SV=2 - [CAD11_HUMAN]	P55287	N-Term(Diethyl); T5(Hex); T11(Hex); T19(Hex); K25(Diethyl)	ETciD	0.946804	1	0	1	1	Light	2.6028	0	3.39143	3	1032.49	3095.45	0.183136	42.6085
DMGGHMGGLSGTTK	Cadherin-11 OS=Homo sapiens GN=CDH11 PE=1 SV=2 - [CAD11_HUMAN]	P55287	N-Term(Diethyl); M2(Oxidation); M6(Oxidation); S10(Hex); T12(Hex); K14(Diethyl)	ETciD	0.442224	1	0	1	1	Light	4.77797	0	3.46525	3	606.278	1816.82	0.283994	18.1016
DMGGHMGGLSGTTK	Cadherin-11 OS=Homo sapiens GN=CDH11 PE=1 SV=2 - [CAD11_HUMAN]	P55287	N-Term(Diethyl); M2(Oxidation); M6(Oxidation); S10(Hex); T12(Hex); K14(Diethyl)	ETciD	0.428039	1	0	1	1	Light	4.99542	0	0.825786	3	606.278	1816.82	0.283994	18.2376
MGGLSGTTK	Cadherin-11 OS=Homo sapiens GN=CDH11 PE=1 SV=2 - [CAD11_HUMAN]	P55287	N-Term(Diethyl); M1(Oxidation); S5(Hex); T7(Hex); K9(Diethyl)	ETciD	0.309285	1	0	1	1	Light	1.78955	0	26.1884	2	652.331	1303.66	0.382621	17.7285
MGGLSGTTK	Cadherin-11 OS=Homo sapiens GN=CDH11 PE=1 SV=2 - [CAD11_HUMAN]	P55287	N-Term(Diethyl); M1(Oxidation); S5(Hex); T7(Hex); K9(Diethyl)	ETciD	0.220331	1	0	1	1	Light	1.77678	0	15.679	2	652.331	1303.65	-0.0855633	18.1882
DMGGHMGGLSGTTK	Cadherin-11 OS=Homo sapiens GN=CDH11 PE=1 SV=2 - [CAD11_HUMAN]	P55287	N-Term(Diethyl(H)); S10(Hex); T12(Hex); K14(Diethyl(H))	ETciD	0.485048	1	0	1	1	Heavy	4.23761	0	10.718	3	598.29	1792.86	0.377261	32.6586
SNVGTSVIQVTASDADDPTYGNSAK	Cadherin-11 OS=Homo sapiens GN=CDH11 PE=1 SV=2 - [CAD11_HUMAN]	P55287	N-Term(Diethyl(H)); T5(Hex); T11(Hex); K25(Diethyl(H))	ETciD	0.52197	1	0	1	1	Heavy	3.77512	0	11.0172	3	981.148	2941.43	1.20371	44.3597
DMGGHMGGLSGTTK	Cadherin-11 OS=Homo sapiens GN=CDH11 PE=1 SV=2 - [CAD11_HUMAN]	P55287	N-Term(Diethyl(H)); M2(Oxidation); M6(Oxidation); S10(Hex); T12(Hex); K14(Diethyl(H))	ETciD	0.439196	1	0	1	1	Heavy	4.80912	0	15.1868	3	608.953	1824.85	-0.344267	18.0349
SNVGTSVIQVTASDADDPTYGNSAK	Cadherin-11 OS=Homo sapiens GN=CDH11 PE=1 SV=2 - [CAD11_HUMAN]	P55287	N-Term(Diethyl(H)); T5(Hex); T11(Hex); K25(Diethyl(H))	ETciD	0.495433	1	0	1	1	Heavy	3.69607	0	7.50755	3	981.148	2941.43	0.643458	43.6977
MGGLSGTTK	Cadherin-11 OS=Homo sapiens GN=CDH11 PE=1 SV=2 - [CAD11_HUMAN]	P55287	N-Term(Diethyl(H)); S5(Hex); T7(Hex); K9(Diethyl(H))	ETciD	0.271656	1	0	1	1	Heavy	1.67901	0	3.25804	2	648.347	1295.69	0.0524411	24.6339
SNVGTSVIQVTASDADDPTYGNSAK	Cadherin-11 OS=Homo sapiens GN=CDH11 PE=1 SV=2 - [CAD11_HUMAN]	P55287	N-Term(Diethyl); S13(Hex); S23(Hex); K25(Diethyl)	HCD	0.424237	1	0	1	1	Light	2.50713	0	0	2	1467.2	2933.4	0.540494	44.5013
SNVGTSVIQVTASDADDPTYGNSAK	Cadherin-11 OS=Homo sapiens GN=CDH11 PE=1 SV=2 - [CAD11_HUMAN]	P55287	N-Term(Diethyl); S1(Hex); S6(Hex); S13(Hex); K25(Diethyl)	HCD	0.946804	1	0	1	1	Light	2.98761	0	3.39143	3	1032.49	3095.45	0.183136	42.6197
SNVGTSVIQVTASDADDPTYGNSAK	Cadherin-11 OS=Homo sapiens GN=CDH11 PE=1 SV=2 - [CAD11_HUMAN]	P55287	N-Term(Diethyl); S6(Hex); S13(Hex); K25(Diethyl)	HCD	0.504782	1	0	1	1	Light	3.1482	0	3.08158	2	1467.2	2933.4	0.374039	43.7925
DMGGHMGGLSGTTK	Cadherin-11 OS=Homo sapiens GN=CDH11 PE=1 SV=2 - [CAD11_HUMAN]	P55287	N-Term(Diethyl); M2(Oxidation); M6(Oxidation); S10(Hex); T12(Hex); K14(Diethyl)	HCD	0.428039	1	0	1	1	Light	2.15955	0	0.825786	3	606.278	1816.82	0.283994	18.251
SNVGTSVIQVTASDADDPTYGNSAK	Cadherin-11 OS=Homo sapiens GN=CDH11 PE=1 SV=2 - [CAD11_HUMAN]	P55287	N-Term(Diethyl(H)); T5(Hex); T11(Hex); K25(Diethyl(H))	HCD	0.52197	1	0	1	1	Heavy	5.3894	0	11.0172	3	981.148	2941.43	1.20371	44.3708
SNVGTSVIQVTASDADDPTYGNSAK	Cadherin-11 OS=Homo sapiens GN=CDH11 PE=1 SV=2 - [CAD11_HUMAN]	P55287	N-Term(Diethyl(H)); T5(Hex); T11(Hex); K25(Diethyl(H))	HCD	0.495433	1	0	1	1	Heavy	5.10394	0	7.50755	3	981.148	2941.43	0.643458	43.7065
SNVGTSVIQVTASDADDPTYGNS	Cadherin-11 OS=Homo sapiens GN=CDH11 PE=1 SV=2 - [CAD11_HUMAN]	P55287	N-Term(Diethyl(H)); T11(Hex); T19(Hex)	HCD	2.50955	1	0	1	1	Heavy	3.66928	0	4.03857	2	1341.61	2682.22	0.452931	46.8852
EGPYIGHVMEGSPTGTTVMR	Cadherin-13 OS=Homo sapiens GN=CDH13 PE=1 SV=1 - [CAD13_HUMAN]	P55290	N-Term(Diethyl); M9(Oxidation); T17(Hex); M19(Oxidation)	ETciD	0.452245	1	0	1	1	Light	2.13368	0	49.5934	3	790.372	2369.1	0.371434	34.3364
GIQHPPQSTATVSVTVIDVNENPYFAPNPK	Cadherin-2 OS=Homo sapiens GN=CDH2 PE=1 SV=4 - [CADH2_HUMAN]	P19022	N-Term(Diethyl); T9(Hex); T11(Hex); S13(Hex); T15(Hex); K30(Diethyl)	ETciD	0.448158	1	0	1	1	Light	2.15664	0	2.51957	3	1327.66	3980.97	1.32483	57.146
GIQHPPQSTATVSVTVIDVNENPYFAPNPK	Cadherin-2 OS=Homo sapiens GN=CDH2 PE=1 SV=4 - [CADH2_HUMAN]	P19022	N-Term(Diethyl); T9(Hex); T11(Hex); S13(Hex); T15(Hex); K30(Diethyl)	ETciD	0.45985	1	0	1	1	Light	5.58746	0	36.599	4	995.996	3980.96	0.0182528	57.1518
GIQHPPQSTATVSVTVIDVNENPYFAPNPK	Cadherin-2 OS=Homo sapiens GN=CDH2 PE=1 SV=4 - [CADH2_HUMAN]	P19022	N-Term(Diethyl); T9(Hex); T11(Hex); S13(Hex); T15(Hex); K30(Diethyl)	ETciD	0.46111	1	0	1	1	Light	4.08004	0	0.181225	3	1327.66	3980.96	0.220943	57.3072
GIQHPPQSTATVSVTVIDVNENPYFAPNPK	Cadherin-2 OS=Homo sapiens GN=CDH2 PE=1 SV=4 - [CADH2_HUMAN]	P19022	N-Term(Diethyl); T9(Hex); T11(Hex); S13(Hex); K30(Diethyl)	ETciD	0.349343	1	0	1	1	Light	2.34066	0	11.4689	3	1273.64	3818.91	-0.321577	59.3421
GIQHPPQSTATVSVTVIDVNENPYFAPNPK	Cadherin-2 OS=Homo sapiens GN=CDH2 PE=1 SV=4 - [CADH2_HUMAN]	P19022	N-Term(Diethyl); T9(Hex); T11(Hex); S13(Hex); T15(Hex); K30(Diethyl)	ETciD	0.298315	1	0	1	1	Light	2.29897	0	4.06738	3	1327.66	3980.96	-0.0550283	61.422
GIQHPPQSTATVSVT	Cadherin-2 OS=Homo sapiens GN=CDH2 PE=1 SV=4 - [CADH2_HUMAN]	P19022	N-Term(Diethyl); T9(Hex); T11(Hex); S13(Hex)	ETciD	1.20297	1	0	1	1	Light	3.29192	0	53.7932	3	689.008	2065.01	0.409404	28.936
GIQHPPQSTATVSVT	Cadherin-2 OS=Homo sapiens GN=CDH2 PE=1 SV=4 - [CADH2_HUMAN]	P19022	N-Term(Diethyl); T9(Hex); T11(Hex); S13(Hex)	ETciD	1.24018	1	0	1	1	Light	2.38913	0	0	2	1033.01	2065.01	0.238574	28.2807
GIQHPPQSTATVSVTVIDVNENPYFAPNPK	Cadherin-2 OS=Homo sapiens GN=CDH2 PE=1 SV=4 - [CADH2_HUMAN]	P19022	N-Term(Diethyl(H)); T9(Hex); T11(Hex); S13(Hex); T15(Hex); K30(Diethyl(H))	ETciD	0.407462	1	0	1	1	Heavy	4.02576	0	17.1326	4	998.003	3988.99	0.0832975	61.6989
GIQHPPQSTA	Cadherin-2 OS=Homo sapiens GN=CDH2 PE=1 SV=4 - [CADH2_HUMAN]	P19022	N-Term(Diethyl(H)); T9(Hex)	ETciD	1.33946	1	0	1	1	Heavy	2.09743	0	15.4606	2	629.329	1257.65	0.498879	19.791
TAQDPDRYMQQNIR	Cadherin-2 OS=Homo sapiens GN=CDH2 PE=1 SV=4 - [CADH2_HUMAN]	P19022	N-Term(Diethyl(H)); T1(Hex); M9(Oxidation)	ETciD	1.54447	1	0	1	1	Heavy	4.95592	1	27.6912	3	658.652	1973.94	0.122338	24.6146
GIQHPPQSTATV	Cadherin-2 OS=Homo sapiens GN=CDH2 PE=1 SV=4 - [CADH2_HUMAN]	P19022	N-Term(Diethyl(H)); T9(Hex); T11(Hex)	ETciD	1.54423	1	0	1	1	Heavy	1.62469	0	21.6452	2	810.414	1619.82	0.475854	25.8972
GIQHPPQSTATVSVT	Cadherin-2 OS=Homo sapiens GN=CDH2 PE=1 SV=4 - [CADH2_HUMAN]	P19022	N-Term(Diethyl(H)); T9(Hex); T11(Hex); S13(Hex)	ETciD	1.27274	1	0	1	1	Heavy	2.65635	0	6.97867	2	1035.01	2069.02	-0.230143	28.8568
TAQDPDRYMQQNIR	Cadherin-2 OS=Homo sapiens GN=CDH2 PE=1 SV=4 - [CADH2_HUMAN]	P19022	N-Term(Diethyl(H)); T1(Hex)	ETciD	1.87574	1	0	1	1	Heavy	5.07102	1	35.0257	3	653.321	1957.95	0.362976	35.2432
GIQHPPQSTA	Cadherin-2 OS=Homo sapiens GN=CDH2 PE=1 SV=4 - [CADH2_HUMAN]	P19022	N-Term(Diethyl(H)); T9(Hex)	ETciD	1.30093	1	0	1	1	Heavy	2.10201	0	21.7035	2	629.329	1257.65	0.207693	19.7566
TAQDPDRYMQQNIR	Cadherin-2 OS=Homo sapiens GN=CDH2 PE=1 SV=4 - [CADH2_HUMAN]	P19022	N-Term(Diethyl(H)); T1(Hex); M9(Oxidation)	ETciD	1.62875	1	0	1	1	Heavy	4.68026	1	28.8291	3	658.652	1973.94	0.493384	23.964
TAQDPDRYMQQNIR	Cadherin-2 OS=Homo sapiens GN=CDH2 PE=1 SV=4 - [CADH2_HUMAN]	P19022	N-Term(Diethyl(H)); T1(Hex)	ETciD	1.70391	1	0	1	1	Heavy	4.91839	1	32.0505	3	653.32	1957.95	-0.198138	33.9808
GIQHPPQSTATVSVTVIDVNENPYFAPNPK	Cadherin-2 OS=Homo sapiens GN=CDH2 PE=1 SV=4 - [CADH2_HUMAN]	P19022	N-Term(Diethyl); S8(Hex); T9(Hex); T11(Hex); S13(Hex); K30(Diethyl)	HCD	0.45985	1	0	1	1	Light	3.69988	0	36.599	4	995.996	3980.96	0.0182528	57.1606
GIQHPPQSTATVSVTVIDVNENPYFAPNPK	Cadherin-2 OS=Homo sapiens GN=CDH2 PE=1 SV=4 - [CADH2_HUMAN]	P19022	N-Term(Diethyl); T9(Hex); T11(Hex); T15(Hex); K30(Diethyl)	HCD	0.349343	1	0	1	1	Light	3.74078	0	11.4689	3	1273.64	3818.91	-0.321577	59.3504
GIQHPPQSTATVSVTVIDVNENPYFAPNPK	Cadherin-2 OS=Homo sapiens GN=CDH2 PE=1 SV=4 - [CADH2_HUMAN]	P19022	N-Term(Diethyl); S8(Hex); T9(Hex); T11(Hex); S13(Hex); K30(Diethyl)	HCD	0.298315	1	0	1	1	Light	3.47124	0	4.06738	3	1327.66	3980.96	-0.0550283	61.4342
GIQHPPQSTATVSVTVIDVNENPY	Cadherin-2 OS=Homo sapiens GN=CDH2 PE=1 SV=4 - [CADH2_HUMAN]	P19022	N-Term(Diethyl); T9(Hex); T11(Hex); S13(Hex); T15(Hex)	HCD	1.89226	1	0	1	1	Light	2.66318	0	30.1166	2	1635.78	3270.55	-0.691282	51.6758
GIQHPPQSTATVSVTVIDVNENPYFAPNPK	Cadherin-2 OS=Homo sapiens GN=CDH2 PE=1 SV=4 - [CADH2_HUMAN]	P19022	N-Term(Diethyl(H)); T9(Hex); T11(Hex); S13(Hex); T15(Hex); K30(Diethyl(H))	HCD	0.448158	1	0	1	1	Heavy	4.1491	0	8.34913	3	1330.34	3989	1.72386	57.3818
GIQHPPQSTATVSVTVIDVNENPYFAPNPK	Cadherin-2 OS=Homo sapiens GN=CDH2 PE=1 SV=4 - [CADH2_HUMAN]	P19022	N-Term(Diethyl(H)); T9(Hex); T11(Hex); S13(Hex); T15(Hex); K30(Diethyl(H))	HCD	0.46111	1	0	1	1	Heavy	4.03103	0	4.39627	3	1330.33	3988.99	-0.479465	57.7292
GIQHPPQSTATVSVTVIDVNENPYFAPNPK	Cadherin-2 OS=Homo sapiens GN=CDH2 PE=1 SV=4 - [CADH2_HUMAN]	P19022	N-Term(Diethyl(H)); S8(Hex); T9(Hex); T11(Hex); S13(Hex); K30(Diethyl(H))	HCD	0.407462	1	0	1	1	Heavy	3.0308	0	17.1326	4	998.003	3988.99	0.0832975	61.711
QEEGLHAGTMLTTFTAQDPD	Cadherin-2 OS=Homo sapiens GN=CDH2 PE=1 SV=4 - [CADH2_HUMAN]	P19022	N-Term(Diethyl(H)); M10(Oxidation); T15(Hex)	HCD	2.10017	1	0	1	1	Heavy	3.27414	0	36.0583	3	800.703	2400.1	0.362805	48.5124
DMGGHSGGLSGTTTLTVTLTDVNDNPPK	Cadherin-8 OS=Homo sapiens GN=CDH8 PE=1 SV=2 - [CADH8_HUMAN]	P55286	N-Term(Diethyl); M2(Oxidation); S6(Hex); S10(Hex); T12(Hex); T13(Hex); T14(Hex); K28(Diethyl)	HCD	0.334695	1	0	1	1	Light	3.14093	0	1.54916	3	1241.91	3723.72	0.278058	45.3871
VTVEDKDLVNTANWR	Desmocollin-2 OS=Homo sapiens GN=DSC2 PE=1 SV=1 - [DSC2_HUMAN]	Q02487	N-Term(Diethyl); T2(Hex); K6(Diethyl)	ETciD	0.156885	1	0	1	1	Light	3.0266	1	12.2139	3	678.697	2034.08	0.253966	51.5373
TCTGTLGIILQDVNDNSPFIPK	Desmocollin-2 OS=Homo sapiens GN=DSC2 PE=1 SV=1 - [DSC2_HUMAN]	Q02487	T1(Hex); N-Term(Diethyl); C2(Carbamidomethyl); T3(Hex); T5(Hex); K22(Diethyl)	ETciD	0.485468	1	0	1	1	Light	4.47303	0	0.356674	3	1001.17	3001.51	1.09188	75.1869
VTVEDKDLVNTANWR	Desmocollin-2 OS=Homo sapiens GN=DSC2 PE=1 SV=1 - [DSC2_HUMAN]	Q02487	N-Term(Diethyl); T2(Hex); K6(Diethyl)	ETciD	0.111302	1	0	1	1	Light	5.30407	1	12.2096	3	678.697	2034.08	0.343985	51.3085
TCTGTLGIILQDVNDNSPFIPK	Desmocollin-2 OS=Homo sapiens GN=DSC2 PE=1 SV=1 - [DSC2_HUMAN]	Q02487	T1(Hex); N-Term(Diethyl); C2(Carbamidomethyl); T3(Hex); T5(Hex); K22(Diethyl)	ETciD	0.513582	1	0	1	1	Light	4.47297	0	9.66307	3	1001.17	3001.51	0.0548087	74.9919
TCTGTLGIILQDVNDNSPFIPK	Desmocollin-2 OS=Homo sapiens GN=DSC2 PE=1 SV=1 - [DSC2_HUMAN]	Q02487	T1(Hex); N-Term(Diethyl); C2(Carbamidomethyl); T3(Hex); T5(Hex); K22(Diethyl)	ETciD	0.489231	1	0	1	1	Light	3.78271	0	2.22273	3	1001.17	3001.51	0.969876	76.8006
VTVEDKDLVNTAN	Desmocollin-2 OS=Homo sapiens GN=DSC2 PE=1 SV=1 - [DSC2_HUMAN]	Q02487	N-Term(Diethyl); T2(Hex); K6(Diethyl)	ETciD	0.135746	1	0	1	1	Light	2.76693	1	72.8036	2	846.451	1691.9	0.252995	39.7207
VTVEDKDLVNTA	Desmocollin-2 OS=Homo sapiens GN=DSC2 PE=1 SV=1 - [DSC2_HUMAN]	Q02487	N-Term(Diethyl); T2(Hex); K6(Diethyl)	ETciD	0.140861	1	0	1	1	Light	2.6096	1	11.6666	2	789.431	1577.85	1.1751	41.9015
TCTGTLGIILQDVN	Desmocollin-2 OS=Homo sapiens GN=DSC2 PE=1 SV=1 - [DSC2_HUMAN]	Q02487	T1(Hex); N-Term(Diethyl); C2(Carbamidomethyl); T3(Hex); T5(Hex)	ETciD	1.36185	1	0	1	1	Light	1.90662	0	0	2	1024	2046.99	-0.244516	59.7418
VTVEDKDLVNTAN	Desmocollin-2 OS=Homo sapiens GN=DSC2 PE=1 SV=1 - [DSC2_HUMAN]	Q02487	N-Term(Diethyl); T2(Hex); K6(Diethyl)	ETciD	0.144044	1	0	1	1	Light	2.83817	1	37.4248	2	846.451	1691.9	0.108695	39.0192
VTVEDKDLVNTAN	Desmocollin-2 OS=Homo sapiens GN=DSC2 PE=1 SV=1 - [DSC2_HUMAN]	Q02487	N-Term(Diethyl); T2(Hex); K6(Diethyl)	ETciD	0.136591	1	0	1	1	Light	4.0155	1	30.3487	3	564.637	1691.9	0.136822	39.0676
VTVEDKDLVNTA	Desmocollin-2 OS=Homo sapiens GN=DSC2 PE=1 SV=1 - [DSC2_HUMAN]	Q02487	N-Term(Diethyl); T2(Hex); K6(Diethyl)	ETciD	0.121084	1	0	1	1	Light	2.78221	1	20.1847	2	789.43	1577.85	0.556181	41.2902
VTVEDKDLVNTAN	Desmocollin-2 OS=Homo sapiens GN=DSC2 PE=1 SV=1 - [DSC2_HUMAN]	Q02487	N-Term(Diethyl); T2(Hex); K6(Diethyl)	ETciD	0.128512	1	0	1	1	Light	2.46275	1	24.5504	2	846.452	1691.9	0.541595	39.8632
TCTGTLGIILQDVNDNSPFIPK	Desmocollin-2 OS=Homo sapiens GN=DSC2 PE=1 SV=1 - [DSC2_HUMAN]	Q02487	T1(Hex); N-Term(Diethyl(H)); C2(Carbamidomethyl); T3(Hex); T5(Hex); K22(Diethyl(H))	ETciD	0.454373	1	0	1	1	Heavy	1.94265	0	39.6652	4	753.139	3009.54	0.825997	74.942
TCTGTLGIILQDVNDNSPFIPK	Desmocollin-2 OS=Homo sapiens GN=DSC2 PE=1 SV=1 - [DSC2_HUMAN]	Q02487	T1(Hex); N-Term(Diethyl(H)); C2(Carbamidomethyl); T3(Hex); T5(Hex); K22(Diethyl(H))	ETciD	0.489947	1	0	1	1	Heavy	2.48359	0	78.2037	3	1003.85	3009.54	1.19551	77.1399
SAMSTATVT	Desmocollin-2 OS=Homo sapiens GN=DSC2 PE=1 SV=1 - [DSC2_HUMAN]	Q02487	N-Term(Diethyl(H)); M3(Oxidation); T5(Hex); T7(Hex)	ETciD	2.37211	1	0	1	1	Heavy	2.04102	0	6.82015	2	634.796	1268.59	0.351814	16.4459
TCTGTLGIILQ	Desmocollin-2 OS=Homo sapiens GN=DSC2 PE=1 SV=1 - [DSC2_HUMAN]	Q02487	T1(Hex); N-Term(Diethyl(H)); C2(Carbamidomethyl); T3(Hex); T5(Hex)	ETciD	1.70482	1	0	1	1	Heavy	1.75099	0	20.3175	2	861.936	1722.87	0.915187	53.1914
TCTGTLGIILQ	Desmocollin-2 OS=Homo sapiens GN=DSC2 PE=1 SV=1 - [DSC2_HUMAN]	Q02487	N-Term(Diethyl(H)); T1(Hex); C2(Carbamidomethyl); T3(Hex)	ETciD	1.98197	1	0	1	1	Heavy	1.70928	0	0	2	780.91	1560.81	0.520163	53.3013
TCTGTLGIIL	Desmocollin-2 OS=Homo sapiens GN=DSC2 PE=1 SV=1 - [DSC2_HUMAN]	Q02487	T1(Hex); N-Term(Diethyl(H)); C2(Carbamidomethyl); T3(Hex); T5(Hex)	ETciD	1.69616	1	0	1	1	Heavy	1.86262	0	8.43238	2	797.907	1594.81	0.826968	60.4275
TCTGTLGIILQ	Desmocollin-2 OS=Homo sapiens GN=DSC2 PE=1 SV=1 - [DSC2_HUMAN]	Q02487	T1(Hex); N-Term(Diethyl(H)); C2(Carbamidomethyl); T3(Hex); T5(Hex)	ETciD	1.78556	1	0	1	1	Heavy	1.86981	0	5.675	2	861.936	1722.86	0.419216	52.8014
TCTGTLGIILQD	Desmocollin-2 OS=Homo sapiens GN=DSC2 PE=1 SV=1 - [DSC2_HUMAN]	Q02487	T1(Hex); N-Term(Diethyl(H)); C2(Carbamidomethyl); T3(Hex); T5(Hex)	ETciD	1.58991	1	0	1	1	Heavy	2.24156	0	12.1051	2	919.449	1837.89	-0.0569682	53.3116
TCTGTLGIIL	Desmocollin-2 OS=Homo sapiens GN=DSC2 PE=1 SV=1 - [DSC2_HUMAN]	Q02487	T1(Hex); N-Term(Diethyl(H)); C2(Carbamidomethyl); T3(Hex); T5(Hex)	ETciD	1.74782	1	0	1	1	Heavy	1.84183	0	14.2381	2	797.906	1594.81	0.138086	60.0217
TCTGTLGIILQDVNDNSPFIPK	Desmocollin-2 OS=Homo sapiens GN=DSC2 PE=1 SV=1 - [DSC2_HUMAN]	Q02487	T1(Hex); N-Term(Diethyl); C2(Carbamidomethyl); T3(Hex); T5(Hex); K22(Diethyl)	HCD	0.454373	1	0	1	1	Light	2.46157	0		4	751.133	3001.51	0.660374	74.8893
TCTGTLGIILQDVNDNSPFIPK	Desmocollin-2 OS=Homo sapiens GN=DSC2 PE=1 SV=1 - [DSC2_HUMAN]	Q02487	T1(Hex); N-Term(Diethyl); C2(Carbamidomethyl); T3(Hex); T5(Hex); K22(Diethyl)	HCD	0.497271	1	0	1	1	Light	4.26288	0	0.356674	3	1001.17	3001.51	1.09188	75.1988
TCTGTLGIILQDVNDNSPFIPK	Desmocollin-2 OS=Homo sapiens GN=DSC2 PE=1 SV=1 - [DSC2_HUMAN]	Q02487	N-Term(Diethyl); C2(Carbamidomethyl); T3(Hex); T5(Hex); K22(Diethyl)	HCD	0.331259	1	0	1	1	Light	2.93928	0	25.9915	3	947.159	2839.46	3.12034	83.6603
TCTGTLGIILQDVNDNSPFIPK	Desmocollin-2 OS=Homo sapiens GN=DSC2 PE=1 SV=1 - [DSC2_HUMAN]	Q02487	T1(Hex); N-Term(Diethyl); C2(Carbamidomethyl); T3(Hex); T5(Hex); K22(Diethyl)	HCD	0.513582	1	0	1	1	Light	4.28743	0	9.66307	3	1001.17	3001.51	0.0548087	75.0054
TCTGTLGIILQDVNDNSPFIPK	Desmocollin-2 OS=Homo sapiens GN=DSC2 PE=1 SV=1 - [DSC2_HUMAN]	Q02487	T1(Hex); N-Term(Diethyl); C2(Carbamidomethyl); T3(Hex); T5(Hex); K22(Diethyl)	HCD	0.489231	1	0	1	1	Light	3.83831	0	2.22273	3	1001.17	3001.51	0.969876	76.8129
TCTGTLGIILQDVNDNSPFIPK	Desmocollin-2 OS=Homo sapiens GN=DSC2 PE=1 SV=1 - [DSC2_HUMAN]	Q02487	T1(Hex); N-Term(Diethyl); C2(Carbamidomethyl); T3(Hex); T5(Hex); K22(Diethyl)	HCD	0.00280079	1	0	1	1	Light	2.59456	0	29.9861	4	751.133	3001.51	0.660374	76.8588
TCTGTLGIILQDVNDNSPFIPK	Desmocollin-2 OS=Homo sapiens GN=DSC2 PE=1 SV=1 - [DSC2_HUMAN]	Q02487	T1(Hex); N-Term(Diethyl); C2(Carbamidomethyl); T3(Hex); T5(Hex); K22(Diethyl)	HCD	0.489947	1	0	1	1	Light	3.85982	0	36.6785	3	1001.18	3001.51	1.70193	77.061
KTITGTVL	Desmoglein-2 OS=Homo sapiens GN=DSG2 PE=1 SV=2 - [DSG2_HUMAN]	Q14126	K1(Diethyl(H)); N-Term(Diethyl(H)); T2(Hex); T4(Hex)	ETciD	0.729946	1	0	1	1	Heavy	1.68864	1	4.48365	2	638.89	1276.77	0.161982	32.5759
KTITGTVLIN	Desmoglein-2 OS=Homo sapiens GN=DSG2 PE=1 SV=2 - [DSG2_HUMAN]	Q14126	K1(Diethyl(H)); N-Term(Diethyl(H)); T2(Hex); T4(Hex); T6(Hex)	ETciD	0.962285	1	0	1	1	Heavy	2.09493	1	49.9248	2	833.48	1665.95	0.408575	36.0154
KTITGTVLI	Desmoglein-2 OS=Homo sapiens GN=DSG2 PE=1 SV=2 - [DSG2_HUMAN]	Q14126	K1(Diethyl(H)); N-Term(Diethyl(H)); T2(Hex); T4(Hex); T6(Hex)	ETciD	0.983695	1	0	1	1	Heavy	1.80757	1	17.6162	2	776.458	1551.91	0.570946	42.8464
TITGTVLI	Desmoglein-2 OS=Homo sapiens GN=DSG2 PE=1 SV=2 - [DSG2_HUMAN]	Q14126	N-Term(Diethyl(H)); T1(Hex); T3(Hex); T5(Hex)	ETciD	2.54287	1	0	1	1	Heavy	1.74744	0	13.2091	2	682.373	1363.74	0.806378	52.5237
TITGTVLI	Desmoglein-2 OS=Homo sapiens GN=DSG2 PE=1 SV=2 - [DSG2_HUMAN]	Q14126	N-Term(Diethyl(H)); T1(Hex); T3(Hex)	ETciD	2.78848	1	0	1	1	Heavy	1.67243	0	30.0025	2	601.346	1201.69	0.583375	52.5523
KTITGTVLIN	Desmoglein-2 OS=Homo sapiens GN=DSG2 PE=1 SV=2 - [DSG2_HUMAN]	Q14126	K1(Diethyl(H)); N-Term(Diethyl(H)); T2(Hex); T4(Hex); T6(Hex)	ETciD	0.822602	1	0	1	1	Heavy	2.19305	1	20.2789	2	833.48	1665.95	0.262028	35.1098
TITGTVLI	Desmoglein-2 OS=Homo sapiens GN=DSG2 PE=1 SV=2 - [DSG2_HUMAN]	Q14126	N-Term(Diethyl(H)); T1(Hex); T3(Hex); T5(Hex)	ETciD	2.187	1	0	1	1	Heavy	1.60344	0	29.4004	2	682.373	1363.74	0.537844	52.03
YGPMAGGTLLTLTGNYLNSGNSR	Hepatocyte growth factor receptor OS=Homo sapiens GN=MET PE=1 SV=4 - [MET_HUMAN]	P08581	N-Term(Diethyl); M4(Oxidation); T11(Hex)	ETciD	1.0677	1	0	1	1	Light	4.04349	0	41.3104	3	864.427	2591.27	0.585751	67.613
YGPMAGGTLLTLTGN	Hepatocyte growth factor receptor OS=Homo sapiens GN=MET PE=1 SV=4 - [MET_HUMAN]	P08581	N-Term(Diethyl); M4(Oxidation); T11(Hex)	ETciD	0.963559	1	0	1	1	Light	2.79532	0	20.7873	2	850.427	1699.85	0.672529	59.7483
SFISGGSTITGVGK	Hepatocyte growth factor receptor OS=Homo sapiens GN=MET PE=1 SV=4 - [MET_HUMAN]	P08581	N-Term(Diethyl(H)); T8(Hex); T10(Hex); K14(Diethyl(H))	ETciD	8.42232	1	0	1	1	Heavy	2.08933	0	7.40072	2	877.98	1754.95	0.415686	44.7613
YGPMAGGTLLTLT	Hepatocyte growth factor receptor OS=Homo sapiens GN=MET PE=1 SV=4 - [MET_HUMAN]	P08581	N-Term(Diethyl(H)); M4(Oxidation); T11(Hex)	ETciD	0.796124	1	0	1	1	Heavy	2.11078	0	29.5835	2	766.901	1532.79	-0.398734	62.2543
YGPMAGGTLLTLTGNYLNSGNSR	Hepatocyte growth factor receptor OS=Homo sapiens GN=MET PE=1 SV=4 - [MET_HUMAN]	P08581	N-Term(Diethyl); M4(Oxidation); T11(Hex)	HCD	1.12811	1	0	1	1	Light	3.26466	0	0	2	1296.14	2591.26	-0.445444	67.6994
YGPMAGGTLLTLTGNYLNSGN	Hepatocyte growth factor receptor OS=Homo sapiens GN=MET PE=1 SV=4 - [MET_HUMAN]	P08581	N-Term(Diethyl); M4(Oxidation); T13(Hex)	HCD	1.33696	1	0	1	1	Light	3.26597	0	63.2667	3	783.383	2348.13	0.42623	72.9135
SFISGGSTITGVGK	Hepatocyte growth factor receptor OS=Homo sapiens GN=MET PE=1 SV=4 - [MET_HUMAN]	P08581	N-Term(Diethyl(H)); S7(Hex); T8(Hex); K14(Diethyl(H))	HCD	8.42232	1	0	1	1	Heavy	2.84741	0	7.40072	2	877.98	1754.95	0.415686	44.7737
YGPMAGGTLLTLTGNYLNSGNSR	Hepatocyte growth factor receptor OS=Homo sapiens GN=MET PE=1 SV=4 - [MET_HUMAN]	P08581	N-Term(Diethyl(H)); M4(Oxidation); T13(Hex)	HCD	1.0677	1	0	1	1	Heavy	5.41874	0	36.8895	3	865.764	2595.28	-0.235296	67.8169
GGNFGFGDSR	Heterogeneous nuclear ribonucleoproteins A2/B1 OS=Homo sapiens GN=HNRNPA2B1 PE=1 SV=2 - [ROA2_HUMAN]	P22626	N-Term(Diethyl); S9(Hex)	ETciD	0.00127743	1	0	1	1	Light	1.8128	0	11.6827	2	616.283	1231.56	0.0928335	36.7421
SGNFGGSR	Heterogeneous nuclear ribonucleoproteins A2/B1 OS=Homo sapiens GN=HNRNPA2B1 PE=1 SV=2 - [ROA2_HUMAN]	P22626	N-Term(Diethyl(H)); S7(Hex)	ETciD	3.19691	1	0	1	1	Heavy	1.85962	0	26.7173	2	502.248	1003.49	0.64028	16.1085
SGNFGGSR	Heterogeneous nuclear ribonucleoproteins A2/B1 OS=Homo sapiens GN=HNRNPA2B1 PE=1 SV=2 - [ROA2_HUMAN]	P22626	N-Term(Diethyl(H)); S7(Hex)	ETciD	2.62937	1	0	1	1	Heavy	1.703	0	28.8309	2	502.248	1003.49	0.579457	16.0063
GGNFGFGDSR	Heterogeneous nuclear ribonucleoproteins A2/B1 OS=Homo sapiens GN=HNRNPA2B1 PE=1 SV=2 - [ROA2_HUMAN]	P22626	N-Term(Diethyl); S9(Hex)	HCD	0.0012742	1	0	1	1	Light	3.09193	0	11.6827	2	616.283	1231.56	0.0928335	36.7546
IDPEWSINSGGTLLTVT	Plexin-A1 OS=Homo sapiens GN=PLXNA1 PE=1 SV=3 - [PLXA1_HUMAN]	Q9UIW2	N-Term(Diethyl); T15(Hex)	HCD	0.448498	1	0	1	1	Light	2.90536	0	0	2	1011.02	2021.03	-0.0886025	75.9516
IDPEWSINSGGTLLTVTGTN	Plexin-A1 OS=Homo sapiens GN=PLXNA1 PE=1 SV=3 - [PLXA1_HUMAN]	Q9UIW2	N-Term(Diethyl); T15(Hex)	HCD	0.568767	1	0	1	1	Light	3.59048	0	4.83266	2	1147.08	2293.15	1.35071	73.6999
IDPEWSINSGGTLLTVTGT	Plexin-A1 OS=Homo sapiens GN=PLXNA1 PE=1 SV=3 - [PLXA1_HUMAN]	Q9UIW2	N-Term(Diethyl); T15(Hex)	HCD	0.530736	1	0	1	1	Light	3.00027	0	0	2	1090.06	2179.11	2.41195	75.8754
IDPEWSINSGGTLLTVT	Plexin-A1 OS=Homo sapiens GN=PLXNA1 PE=1 SV=3 - [PLXA1_HUMAN]	Q9UIW2	N-Term(Diethyl); T15(Hex)	HCD	0.473227	1	0	1	1	Light	3.11078	0	6.38269	2	1011.02	2021.04	1.84419	75.8923
IDPEWSINSGGTLLTVTGTN	Plexin-A1 OS=Homo sapiens GN=PLXNA1 PE=1 SV=3 - [PLXA1_HUMAN]	Q9UIW2	N-Term(Diethyl); T15(Hex)	HCD	0.390033	1	0	1	1	Light	4.23423	0	19.9451	2	1147.08	2293.15	0.711918	74.0317
IDPEWSINSGGTLLTVT	Plexin-A1 OS=Homo sapiens GN=PLXNA1 PE=1 SV=3 - [PLXA1_HUMAN]	Q9UIW2	N-Term(Diethyl); T15(Hex)	HCD	0.393152	1	0	1	1	Light	3.13289	0	17.9263	2	1011.02	2021.03	1.059	76.5668
IDPEWSINSGGTLLTVT	Plexin-A1 OS=Homo sapiens GN=PLXNA1 PE=1 SV=3 - [PLXA1_HUMAN]	Q9UIW2	N-Term(Diethyl(H)); T15(Hex)	HCD	0.470399	1	0	1	1	Heavy	3.09749	0	39.373	2	1013.03	2025.04	-1.16965	76.3086
ITILGSN	Plexin-B2 OS=Homo sapiens GN=PLXNB2 PE=1 SV=3 - [PLXB2_HUMAN]	O15031	N-Term(Diethyl(H)); T2(Hex)	ETciD	0.394095	1	0	1	1	Heavy	1.64108	0	35.4278	2	470.275	939.543	-0.0532029	44.5755
TITVAGER	Plexin-D1 OS=Homo sapiens GN=PLXND1 PE=1 SV=3 - [PLXD1_HUMAN]	Q9Y4D7	N-Term(Diethyl(H)); T3(Hex)	ETciD	0.866787	1	0	1	1	Heavy	1.76628	0	64.5376	2	534.802	1068.6	0.232265	26.2191
SGPLDGGTLLTIR	Plexin-D1 OS=Homo sapiens GN=PLXND1 PE=1 SV=3 - [PLXD1_HUMAN]	Q9Y4D7	N-Term(Diethyl); T11(Hex)	HCD	0.861247	1	0	1	1	Light	2.54225	0	29.1743	2	759.425	1517.84	0.177571	58.028
AIEPLSGPLDGGTLLTIR	Plexin-D1 OS=Homo sapiens GN=PLXND1 PE=1 SV=3 - [PLXD1_HUMAN]	Q9Y4D7	N-Term(Diethyl); T16(Hex)	HCD	1.26456	1	0	1	1	Light	4.23744	0	17.3849	2	1021.07	2041.14	-0.0928775	74.5989
AIEPLSGPLDGGTLLTIR	Plexin-D1 OS=Homo sapiens GN=PLXND1 PE=1 SV=3 - [PLXD1_HUMAN]	Q9Y4D7	N-Term(Diethyl); T13(Hex)	HCD	2.44594	1	0	1	1	Light	3.72735	0	78.2713	2	1021.08	2041.15	2.23951	76.4915
AIEPLSGPLDGGTLLTIR	Plexin-D1 OS=Homo sapiens GN=PLXND1 PE=1 SV=3 - [PLXD1_HUMAN]	Q9Y4D7	N-Term(Diethyl(H)); T16(Hex)	HCD	1.11791	1	0	1	1	Heavy	3.77646	0	16.2935	2	1023.08	2045.16	0.985461	74.3798
VDCTANTNTCNK	Protein disulfide-isomerase A3 OS=Homo sapiens GN=PDIA3 PE=1 SV=4 - [PDIA3_HUMAN]	P30101	N-Term(Diethyl); C3(Carbamidomethyl); T9(Hex); C10(Carbamidomethyl); K12(Diethyl)	ETciD	0.167353	1	0	1	1	Light	1.73635	0	0	2	836.382	1671.76	0.543451	17.5467
YGVSGYPTLK	Protein disulfide-isomerase A3 OS=Homo sapiens GN=PDIA3 PE=1 SV=4 - [PDIA3_HUMAN]	P30101	N-Term(Diethyl(H)); S4(Hex); K10(Diethyl(H))	ETciD	0.603912	1	0	1	1	Heavy	2.32818	0	7.36624	2	683.89	1366.77	0.385856	46.442
YGVSGYPTLK	Protein disulfide-isomerase A3 OS=Homo sapiens GN=PDIA3 PE=1 SV=4 - [PDIA3_HUMAN]	P30101	N-Term(Diethyl(H)); S4(Hex); K10(Diethyl(H))	ETciD	0.646252	1	0	1	1	Heavy	2.1779	0	3.85083	2	683.89	1366.77	0.0286043	45.433
YGVSGYPTLK	Protein disulfide-isomerase A3 OS=Homo sapiens GN=PDIA3 PE=1 SV=4 - [PDIA3_HUMAN]	P30101	N-Term(Diethyl(H)); S4(Hex); K10(Diethyl(H))	ETciD	0.654451	1	0	1	1	Heavy	2.08332	0	25.0891	2	683.89	1366.77	0.20723	46.6472
YGVSGYPTLK	Protein disulfide-isomerase A3 OS=Homo sapiens GN=PDIA3 PE=1 SV=4 - [PDIA3_HUMAN]	P30101	N-Term(Diethyl(H)); S4(Hex); K10(Diethyl(H))	ETciD	0.631485	1	0	1	1	Heavy	2.40608	0	31.1295	2	683.89	1366.77	-0.328647	47.1531
YGVSGYPT	Protein disulfide-isomerase A3 OS=Homo sapiens GN=PDIA3 PE=1 SV=4 - [PDIA3_HUMAN]	P30101	N-Term(Diethyl(H)); S4(Hex)	ETciD	1.84564	1	0	1	1	Heavy	1.65885	0	46.8378	2	533.262	1065.52	0.432113	39.4503
VDCTANTNTCNK	Protein disulfide-isomerase A3 OS=Homo sapiens GN=PDIA3 PE=1 SV=4 - [PDIA3_HUMAN]	P30101	N-Term(Diethyl); C3(Carbamidomethyl); T7(Hex); C10(Carbamidomethyl); K12(Diethyl)	HCD	0.167353	1	0	1	1	Light	2.21061	0	0	2	836.382	1671.76	0.543451	17.5594
TVIDYNGER	Protein disulfide-isomerase OS=Homo sapiens GN=P4HB PE=1 SV=3 - [PDIA1_HUMAN]	P07237	N-Term(Diethyl(H)); T1(Hex)	ETciD	1.55483	1	0	1	1	Heavy	1.85923	0	18.5547	2	644.826	1288.65	0.335377	29.6286
DSGTNAQVTY	Protocadherin beta-2 OS=Homo sapiens GN=PCDHB2 PE=1 SV=1 - [PCDB2_HUMAN]	Q9Y5E7	N-Term(Diethyl); T4(Hex)	ETciD	0.958224	1	0	1	1	Light	2.11304	0	2.97835	2	637.294	1273.58	0.630109	31.7254
SGTALVR	Protocadherin beta-2 OS=Homo sapiens GN=PCDHB2 PE=1 SV=1 - [PCDB2_HUMAN]	Q9Y5E7	N-Term(Diethyl(H)); S1(Hex); T3(Hex)	ETciD	1.06866	1	0	1	1	Heavy	1.58632	0	42.4071	2	544.3	1087.59	0.50317	18.0752
YVTAVDRDSGR	Protocadherin Fat 1 OS=Homo sapiens GN=FAT1 PE=1 SV=2 - [FAT1_HUMAN]	Q14517	N-Term(Diethyl); T3(Hex)	ETciD	1.25305	1	0	1	1	Light	2.28119	1	55.6803	3	486.248	1456.73	0.176582	20.7871
YVTAVDRDSGR	Protocadherin Fat 1 OS=Homo sapiens GN=FAT1 PE=1 SV=2 - [FAT1_HUMAN]	Q14517	N-Term(Diethyl); T3(Hex)	ETciD	1.53413	1	0	1	1	Light	2.12169	1	3.93769	2	728.868	1456.73	0.814294	20.2681
VSATDADIGTNGEFYYSFK	Protocadherin Fat 1 OS=Homo sapiens GN=FAT1 PE=1 SV=2 - [FAT1_HUMAN]	Q14517	N-Term(Diethyl); T4(Hex); T10(Hex); K19(Diethyl)	ETciD	0.117734	1	0	1	1	Light	4.02803	0	6.23745	3	841.063	2521.18	-0.0591285	61.5463
ASDADSGTNGQVMY	Protocadherin Fat 1 OS=Homo sapiens GN=FAT1 PE=1 SV=2 - [FAT1_HUMAN]	Q14517	N-Term(Diethyl); T8(Hex); M13(Oxidation)	ETciD	1.05594	1	0	1	1	Light	2.46278	0	5.13536	2	825.346	1649.69	0.585714	29.7562
AAFDENVPIGTTVM	Protocadherin Fat 1 OS=Homo sapiens GN=FAT1 PE=1 SV=2 - [FAT1_HUMAN]	Q14517	N-Term(Diethyl); T12(Hex); M14(Oxidation)	ETciD	0.761376	1	0	1	1	Light	1.98318	0	22.2073	2	849.911	1698.82	0.675168	53.7922
AAFDENVPIGTTVMS	Protocadherin Fat 1 OS=Homo sapiens GN=FAT1 PE=1 SV=2 - [FAT1_HUMAN]	Q14517	N-Term(Diethyl); T12(Hex); M14(Oxidation)	ETciD	0.708708	1	0	1	1	Light	2.17183	0	25.5461	2	893.426	1785.85	-0.68311	52.6996
AAFDENVPIGTTVM	Protocadherin Fat 1 OS=Homo sapiens GN=FAT1 PE=1 SV=2 - [FAT1_HUMAN]	Q14517	N-Term(Diethyl); T12(Hex)	ETciD	0.733339	1	0	1	1	Light	2.37734	0	19.5741	2	841.913	1682.82	-0.163954	62.6658
YVTAVDRDSGR	Protocadherin Fat 1 OS=Homo sapiens GN=FAT1 PE=1 SV=2 - [FAT1_HUMAN]	Q14517	N-Term(Diethyl(H)); T3(Hex)	ETciD	1.31489	1	0	1	1	Heavy	2.84232	1	45.8325	3	487.585	1460.74	-0.215554	20.1996
YVTAVDRDSGR	Protocadherin Fat 1 OS=Homo sapiens GN=FAT1 PE=1 SV=2 - [FAT1_HUMAN]	Q14517	N-Term(Diethyl(H)); T3(Hex)	ETciD	1.44837	1	0	1	1	Heavy	2.68009	1	50.9377	3	487.585	1460.74	-0.0275272	20.29
ASDADSGTNGQVMY	Protocadherin Fat 1 OS=Homo sapiens GN=FAT1 PE=1 SV=2 - [FAT1_HUMAN]	Q14517	N-Term(Diethyl(H)); T8(Hex)	ETciD	1.10577	1	0	1	1	Heavy	2.13458	0	25.1176	2	819.356	1637.7	0.545801	35.4777
AAFDENVPIGTTVM	Protocadherin Fat 1 OS=Homo sapiens GN=FAT1 PE=1 SV=2 - [FAT1_HUMAN]	Q14517	N-Term(Diethyl(H)); T12(Hex); M14(Oxidation)	ETciD	0.759247	1	0	1	1	Heavy	2.52711	0	27.9827	2	851.917	1702.83	-0.182122	53.3969
VSATDADIGTNGEFYYSFK	Protocadherin Fat 1 OS=Homo sapiens GN=FAT1 PE=1 SV=2 - [FAT1_HUMAN]	Q14517	N-Term(Diethyl); T4(Hex); T10(Hex); K19(Diethyl)	HCD	0.117734	1	0	1	1	Light	3.97853	0	6.23745	3	841.063	2521.18	-0.0591285	61.5607
AAFDENVPIGTTVM	Protocadherin Fat 1 OS=Homo sapiens GN=FAT1 PE=1 SV=2 - [FAT1_HUMAN]	Q14517	N-Term(Diethyl); T12(Hex); M14(Oxidation)	HCD	0.761376	1	0	1	1	Light	3.07808	0	22.2073	2	849.911	1698.82	0.675168	53.8047
AAFDENVPIGTTVMS	Protocadherin Fat 1 OS=Homo sapiens GN=FAT1 PE=1 SV=2 - [FAT1_HUMAN]	Q14517	N-Term(Diethyl); T12(Hex); M14(Oxidation)	HCD	0.708708	1	0	1	1	Light	3.01024	0	25.5461	2	893.426	1785.85	-0.68311	52.7093
AAFDENVPIGTTVMSL	Protocadherin Fat 1 OS=Homo sapiens GN=FAT1 PE=1 SV=2 - [FAT1_HUMAN]	Q14517	N-Term(Diethyl); T12(Hex)	HCD	0.936782	1	0	1	1	Light	2.64585	0	24.1389	2	941.972	1882.94	0.884835	74.0591
AAFDENVPIGTTVM	Protocadherin Fat 1 OS=Homo sapiens GN=FAT1 PE=1 SV=2 - [FAT1_HUMAN]	Q14517	N-Term(Diethyl(H)); T12(Hex); M14(Oxidation)	HCD	0.759247	1	0	1	1	Heavy	3.31601	0	27.9827	2	851.917	1702.83	-0.182122	53.4095
IGTSVLQVTAR	Protocadherin Fat 3 OS=Homo sapiens GN=FAT3 PE=2 SV=2 - [FAT3_HUMAN]	Q8TDW7	N-Term(Diethyl); T3(Hex); T9(Hex)	ETciD	0.436428	1	0	1	1	Light	1.88572	0	10.9761	2	762.922	1524.84	0.459487	39.846
ATDGDPGTYGQISY	Protocadherin Fat 3 OS=Homo sapiens GN=FAT3 PE=2 SV=2 - [FAT3_HUMAN]	Q8TDW7	N-Term(Diethyl); T2(Hex)	ETciD	1.24751	1	0	1	1	Light	2.02899	0	0	2	831.873	1662.74	0.844541	46.1396
IGTSVLQVTAR	Protocadherin Fat 3 OS=Homo sapiens GN=FAT3 PE=2 SV=2 - [FAT3_HUMAN]	Q8TDW7	N-Term(Diethyl(H)); T3(Hex); T9(Hex)	ETciD	0.450489	1	0	1	1	Heavy	2.03319	0	12.737	2	764.929	1528.85	0.463339	40.3379
ATDGDPGTYGQISY	Protocadherin Fat 3 OS=Homo sapiens GN=FAT3 PE=2 SV=2 - [FAT3_HUMAN]	Q8TDW7	N-Term(Diethyl); S13(Hex)	HCD	1.24751	1	0	1	1	Light	2.67086	0	0	2	831.873	1662.74	0.844541	46.1486
QVILDTATDSDIGSNGVDHR	Protocadherin Fat 4 OS=Homo sapiens GN=FAT4 PE=1 SV=2 - [FAT4_HUMAN]	Q6V0I7	N-Term(Diethyl); T6(Hex); S14(Hex)	ETciD	1.31142	1	0	1	1	Light	3.31865	0	45.3304	3	831.733	2493.18	0.381175	39.4606
DSGVPQMSSTGTVHITVIDQNDNPSQSR	Protocadherin Fat 4 OS=Homo sapiens GN=FAT4 PE=1 SV=2 - [FAT4_HUMAN]	Q6V0I7	N-Term(Diethyl); S2(Hex); M7(Oxidation); S8(Hex); S9(Hex)	ETciD	0.655406	1	0	1	1	Light	2.49078	0	34.8037	3	1176.87	3528.6	0.145046	39.5978
IGELVSSVTATDSDSGDNAD	Protocadherin Fat 4 OS=Homo sapiens GN=FAT4 PE=1 SV=2 - [FAT4_HUMAN]	Q6V0I7	N-Term(Diethyl); T9(Hex)	ETciD	0.281318	1	0	1	1	Light	2.04167	0	0	2	1085.99	2170.97	1.11548	48.6178
IGELVSSVTATDSDSGDNAD	Protocadherin Fat 4 OS=Homo sapiens GN=FAT4 PE=1 SV=2 - [FAT4_HUMAN]	Q6V0I7	N-Term(Diethyl); T11(Hex)	ETciD	0.299964	1	0	1	1	Light	2.54674	0	0	2	1085.99	2170.97	0.553195	48.1628
QVILDTATDSDIGSNGVDHR	Protocadherin Fat 4 OS=Homo sapiens GN=FAT4 PE=1 SV=2 - [FAT4_HUMAN]	Q6V0I7	N-Term(Diethyl); T6(Hex); T8(Hex)	HCD	1.31142	1	0	1	1	Light	3.87345	0	45.3304	3	831.733	2493.18	0.381175	39.4746
DSGVPQMSSTGTVHITVIDQNDNPSQSR	Protocadherin Fat 4 OS=Homo sapiens GN=FAT4 PE=1 SV=2 - [FAT4_HUMAN]	Q6V0I7	N-Term(Diethyl); S2(Hex); M7(Oxidation); S8(Hex); S9(Hex)	HCD	0.655406	1	0	1	1	Light	2.82537	0	34.8037	3	1176.87	3528.6	0.145046	39.6103
IGELVSSVTATDSDSGDNAD	Protocadherin Fat 4 OS=Homo sapiens GN=FAT4 PE=1 SV=2 - [FAT4_HUMAN]	Q6V0I7	N-Term(Diethyl); S15(Hex)	HCD	0.281318	1	0	1	1	Light	3.89319	0	0	2	1085.99	2170.97	1.11548	48.6308
IGELVSSVTATDSDSGDNAD	Protocadherin Fat 4 OS=Homo sapiens GN=FAT4 PE=1 SV=2 - [FAT4_HUMAN]	Q6V0I7	N-Term(Diethyl); S15(Hex)	HCD	0.299964	1	0	1	1	Light	3.99005	0	0	2	1085.99	2170.97	0.553195	48.1765
GASIFSVTALDPDSK	Protocadherin gamma-A11 OS=Homo sapiens GN=PCDHGA11 PE=1 SV=1 - [PCDGB_HUMAN]	Q9Y5H2	N-Term(Diethyl); S3(Hex); S6(Hex); K15(Diethyl)	ETciD	0.273196	1	0	1	1	Light	1.79486	0	0	2	972.502	1944	1.26064	61.4898
GASIFSVTALDPDSK	Protocadherin gamma-A11 OS=Homo sapiens GN=PCDHGA11 PE=1 SV=1 - [PCDGB_HUMAN]	Q9Y5H2	N-Term(Diethyl); S3(Hex); S6(Hex); K15(Diethyl)	ETciD	0.246764	1	0	1	1	Light	3.48736	0	8.8605	3	648.67	1944	0.123441	61.5586
GASIFSVTALDPDSK	Protocadherin gamma-A11 OS=Homo sapiens GN=PCDHGA11 PE=1 SV=1 - [PCDGB_HUMAN]	Q9Y5H2	N-Term(Diethyl); S3(Hex); K15(Diethyl)	ETciD	0.232797	1	0	1	1	Light	4.29765	0	48.3554	3	594.652	1781.94	0.184964	61.6092
GASIFSVTALDPDSK	Protocadherin gamma-A11 OS=Homo sapiens GN=PCDHGA11 PE=1 SV=1 - [PCDGB_HUMAN]	Q9Y5H2	N-Term(Diethyl); S3(Hex); S6(Hex); K15(Diethyl)	ETciD	0.263158	1	0	1	1	Light	1.79804	0	53.0492	2	972.502	1944	0.6955	61.1996
GASIFSVTALDPDSK	Protocadherin gamma-A11 OS=Homo sapiens GN=PCDHGA11 PE=1 SV=1 - [PCDGB_HUMAN]	Q9Y5H2	N-Term(Diethyl); S3(Hex); S6(Hex); K15(Diethyl)	ETciD	0.256549	1	0	1	1	Light	3.63865	0	51.0879	3	648.67	1943.99	-0.34751	61.2418
GASIFSVTALDPDSK	Protocadherin gamma-A11 OS=Homo sapiens GN=PCDHGA11 PE=1 SV=1 - [PCDGB_HUMAN]	Q9Y5H2	N-Term(Diethyl); S3(Hex); K15(Diethyl)	ETciD	0.215494	1	0	1	1	Light	4.48004	0	44.6905	3	594.652	1781.94	-0.123305	61.345
GASIFSVTALDPDSK	Protocadherin gamma-A11 OS=Homo sapiens GN=PCDHGA11 PE=1 SV=1 - [PCDGB_HUMAN]	Q9Y5H2	N-Term(Diethyl); S3(Hex); S6(Hex); K15(Diethyl)	HCD	0.273196	1	0	1	1	Light	2.5577	0	0	2	972.502	1944	1.26064	61.5014
GASIFSVTALDPDSK	Protocadherin gamma-A11 OS=Homo sapiens GN=PCDHGA11 PE=1 SV=1 - [PCDGB_HUMAN]	Q9Y5H2	N-Term(Diethyl); S3(Hex); S6(Hex); K15(Diethyl)	HCD	0.246764	1	0	1	1	Light	2.94165	0	8.8605	3	648.67	1944	0.123441	61.5709
GASIFSVTALDPDSK	Protocadherin gamma-A11 OS=Homo sapiens GN=PCDHGA11 PE=1 SV=1 - [PCDGB_HUMAN]	Q9Y5H2	N-Term(Diethyl); S6(Hex); K15(Diethyl)	HCD	0.232797	1	0	1	1	Light	3.86168	0	48.3554	3	594.652	1781.94	0.184964	61.6177
GASIFSVTALDPDSK	Protocadherin gamma-A11 OS=Homo sapiens GN=PCDHGA11 PE=1 SV=1 - [PCDGB_HUMAN]	Q9Y5H2	N-Term(Diethyl); S3(Hex); S6(Hex); K15(Diethyl)	HCD	0.263158	1	0	1	1	Light	2.434	0	53.0492	2	972.502	1944	0.6955	61.2128
GASIFSVTALDPDSK	Protocadherin gamma-A11 OS=Homo sapiens GN=PCDHGA11 PE=1 SV=1 - [PCDGB_HUMAN]	Q9Y5H2	N-Term(Diethyl); S3(Hex); S6(Hex); K15(Diethyl)	HCD	0.256549	1	0	1	1	Light	2.7991	0	51.0879	3	648.67	1943.99	-0.34751	61.251
GASIFSVTALDPDSK	Protocadherin gamma-A11 OS=Homo sapiens GN=PCDHGA11 PE=1 SV=1 - [PCDGB_HUMAN]	Q9Y5H2	N-Term(Diethyl); S6(Hex); K15(Diethyl)	HCD	0.215494	1	0	1	1	Light	4.11577	0	44.6905	3	594.652	1781.94	-0.123305	61.3539
TGTALLTIR	Protocadherin-10 OS=Homo sapiens GN=PCDH10 PE=2 SV=2 - [PCD10_HUMAN]	Q9P2E7	N-Term(Diethyl); T3(Hex)	ETciD	0.673198	1	0	1	1	Light	1.77824	0	33.1124	2	582.348	1163.69	0.466621	40.7825
TGTALLTIR	Protocadherin-10 OS=Homo sapiens GN=PCDH10 PE=2 SV=2 - [PCD10_HUMAN]	Q9P2E7	N-Term(Diethyl(H)); T1(Hex); T3(Hex)	ETciD	0.661835	1	0	1	1	Heavy	2.08177	0	22.0888	2	665.381	1329.75	0.346764	41.0814
TGTALLTIR	Protocadherin-10 OS=Homo sapiens GN=PCDH10 PE=2 SV=2 - [PCD10_HUMAN]	Q9P2E7	N-Term(Diethyl(H)); T3(Hex)	ETciD	0.530472	1	0	1	1	Heavy	1.91121	0	14.986	2	584.354	1167.7	-0.155593	39.8858
TGTALLTIR	Protocadherin-10 OS=Homo sapiens GN=PCDH10 PE=2 SV=2 - [PCD10_HUMAN]	Q9P2E7	N-Term(Diethyl(H)); T1(Hex); T3(Hex)	ETciD	0.646514	1	0	1	1	Heavy	1.96744	0	22.4416	2	665.381	1329.75	0.254965	40.1574
TGTALLTIR	Protocadherin-10 OS=Homo sapiens GN=PCDH10 PE=2 SV=2 - [PCD10_HUMAN]	Q9P2E7	N-Term(Diethyl(H)); T1(Hex); T3(Hex)	ETciD	0.630214	1	0	1	1	Heavy	2.23393	0	25.6237	2	665.381	1329.75	0.346764	40.5944
TGTALLTIR	Protocadherin-10 OS=Homo sapiens GN=PCDH10 PE=2 SV=2 - [PCD10_HUMAN]	Q9P2E7	N-Term(Diethyl(H)); T1(Hex); T3(Hex)	ETciD	0.684243	1	0	1	1	Heavy	2.3214	0	20.9115	2	665.381	1329.75	0.254965	41.1271
TGTALLTIR	Protocadherin-10 OS=Homo sapiens GN=PCDH10 PE=2 SV=2 - [PCD10_HUMAN]	Q9P2E7	N-Term(Diethyl(H)); T1(Hex); T3(Hex)	ETciD	0.669099	1	0	1	1	Heavy	1.95205	0	37.3033	2	665.381	1329.75	0.254965	40.9975
AELGQQTGTATVR	Protocadherin-16 OS=Homo sapiens GN=DCHS1 PE=2 SV=1 - [PCD16_HUMAN]	Q96JQ0	N-Term(Diethyl); T7(Hex); T9(Hex); T11(Hex)	ETciD	0.844416	1	0	1	1	Light	1.61818	0	0	2	937.46	1873.91	0.466605	22.2567
DPDQGTNGQVTY	Protocadherin-16 OS=Homo sapiens GN=DCHS1 PE=2 SV=1 - [PCD16_HUMAN]	Q96JQ0	N-Term(Diethyl(H)); T6(Hex)	ETciD	1.44747	1	0	1	1	Heavy	2.09601	0	26.238	2	758.846	1516.68	0.424828	33.3672
SATVQINVK	Protocadherin-17 OS=Homo sapiens GN=PCDH17 PE=2 SV=2 - [PCD17_HUMAN]	O14917	N-Term(Diethyl); S1(Hex); T3(Hex); K9(Diethyl)	ETciD	0.24351	1	0	1	1	Light	2.21116	0	15.1041	2	698.396	1395.78	0.769349	32.4191
SATVQINVK	Protocadherin-17 OS=Homo sapiens GN=PCDH17 PE=2 SV=2 - [PCD17_HUMAN]	O14917	N-Term(Diethyl); S1(Hex); T3(Hex); K9(Diethyl)	ETciD	0.250281	1	0	1	1	Light	2.28346	0	4.14677	2	698.395	1395.78	0.157154	31.8631
SATATVSLF	Protocadherin-7 OS=Homo sapiens GN=PCDH7 PE=1 SV=2 - [PCDH7_HUMAN]	O60245	N-Term(Diethyl(H)); T3(Hex); T5(Hex)	ETciD	1.14048	1	0	1	1	Heavy	1.66365	0	37.7648	2	640.831	1280.65	0.397698	50.0789
SATATVSLFVMDENDNAPTVTLPK	Protocadherin-7 OS=Homo sapiens GN=PCDH7 PE=1 SV=2 - [PCDH7_HUMAN]	O60245	N-Term(Diethyl); S1(Hex); T3(Hex); T5(Hex); S7(Hex); K24(Diethyl)	HCD	0.249667	1	0	1	1	Light	3.56057	0	6.04286	3	1094.54	3281.59	1.71088	66.1533
YSTVGVITVTDADAGENK	Protocadherin-9 OS=Homo sapiens GN=PCDH9 PE=1 SV=2 - [PCDH9_HUMAN]	Q9HC56	N-Term(Diethyl); T3(Hex); T8(Hex); K18(Diethyl)	ETciD	0.533555	1	0	1	1	Light	2.02683	0	1.98328	2	1138.57	2276.13	1.1746	45.2091
YSTVGVITVTDADAGENK	Protocadherin-9 OS=Homo sapiens GN=PCDH9 PE=1 SV=2 - [PCDH9_HUMAN]	Q9HC56	N-Term(Diethyl); T3(Hex); K18(Diethyl)	ETciD	0.533545	1	0	1	1	Light	5.03458	0	26.6814	3	705.364	2114.08	0.578897	45.2819
YSTVGVITVTDADAGENK	Protocadherin-9 OS=Homo sapiens GN=PCDH9 PE=1 SV=2 - [PCDH9_HUMAN]	Q9HC56	N-Term(Diethyl); T3(Hex); T8(Hex); K18(Diethyl)	ETciD	0.544402	1	0	1	1	Light	5.53514	0	2.8728	3	759.381	2276.13	0.337414	44.6052
YSTVGVITVTDADAGENK	Protocadherin-9 OS=Homo sapiens GN=PCDH9 PE=1 SV=2 - [PCDH9_HUMAN]	Q9HC56	N-Term(Diethyl); T3(Hex); K18(Diethyl)	ETciD	0.516788	1	0	1	1	Light	5.61188	0	15.5813	3	705.363	2114.08	0.0592221	44.6807
YSTVGVITVTDADAGENK	Protocadherin-9 OS=Homo sapiens GN=PCDH9 PE=1 SV=2 - [PCDH9_HUMAN]	Q9HC56	N-Term(Diethyl); T3(Hex); K18(Diethyl)	ETciD	0.351528	1	0	1	1	Light	5.13106	0	24.6821	3	705.363	2114.08	-0.0273905	47.3067
YSTVGVITVTDADAGENK	Protocadherin-9 OS=Homo sapiens GN=PCDH9 PE=1 SV=2 - [PCDH9_HUMAN]	Q9HC56	N-Term(Diethyl); T3(Hex); K18(Diethyl)	ETciD	0.375452	1	0	1	1	Light	2.7656	0	26.7539	2	1057.54	2114.08	0.152195	47.3237
YSTVGVITVTDADAGENK	Protocadherin-9 OS=Homo sapiens GN=PCDH9 PE=1 SV=2 - [PCDH9_HUMAN]	Q9HC56	N-Term(Diethyl); T3(Hex); T8(Hex); K18(Diethyl)	ETciD	0.524269	1	0	1	1	Light	2.25992	0	0	2	1138.57	2276.13	0.852812	45.2158
YSTVGVITVTDADAGENK	Protocadherin-9 OS=Homo sapiens GN=PCDH9 PE=1 SV=2 - [PCDH9_HUMAN]	Q9HC56	N-Term(Diethyl); T3(Hex); T8(Hex); K18(Diethyl)	ETciD	0.482677	1	0	1	1	Light	4.80378	0	20.1265	3	759.382	2276.13	1.22232	45.2323
YSTVGVITVTDADAGENK	Protocadherin-9 OS=Homo sapiens GN=PCDH9 PE=1 SV=2 - [PCDH9_HUMAN]	Q9HC56	N-Term(Diethyl); T3(Hex); T8(Hex); K18(Diethyl)	ETciD	0.513073	1	0	1	1	Light	4.11201	0	10.2855	3	759.381	2276.13	0.337414	45.5943
YSTVGVITVTDADAGENK	Protocadherin-9 OS=Homo sapiens GN=PCDH9 PE=1 SV=2 - [PCDH9_HUMAN]	Q9HC56	N-Term(Diethyl); T3(Hex); T8(Hex); K18(Diethyl)	ETciD	0.559569	1	0	1	1	Light	1.64132	0	17.7734	2	1138.57	2276.13	0.960073	45.6012
YSTVGVITVTDADAGENK	Protocadherin-9 OS=Homo sapiens GN=PCDH9 PE=1 SV=2 - [PCDH9_HUMAN]	Q9HC56	N-Term(Diethyl(H)); T3(Hex); T8(Hex); K18(Diethyl(H))	ETciD	0.528976	1	0	1	1	Heavy	5.21551	0	18.333	3	762.057	2284.16	0.476606	45.225
YSTVGVITVT	Protocadherin-9 OS=Homo sapiens GN=PCDH9 PE=1 SV=2 - [PCDH9_HUMAN]	Q9HC56	N-Term(Diethyl(H)); T3(Hex); T8(Hex)	ETciD	1.80481	1	0	1	1	Heavy	1.60479	0	21.6293	2	712.379	1423.75	0.947005	49.3493
YSTVGVITVT	Protocadherin-9 OS=Homo sapiens GN=PCDH9 PE=1 SV=2 - [PCDH9_HUMAN]	Q9HC56	N-Term(Diethyl(H)); T3(Hex)	ETciD	1.65392	1	0	1	1	Heavy	1.65742	0	30.8174	2	631.352	1261.7	1.04292	49.3552
YSTVGVITVTDAD	Protocadherin-9 OS=Homo sapiens GN=PCDH9 PE=1 SV=2 - [PCDH9_HUMAN]	Q9HC56	N-Term(Diethyl(H)); T3(Hex); T8(Hex)	ETciD	2.01676	1	0	1	1	Heavy	1.89042	0	8.80203	2	862.924	1724.84	0.0997477	48.337
YSTVGVITVT	Protocadherin-9 OS=Homo sapiens GN=PCDH9 PE=1 SV=2 - [PCDH9_HUMAN]	Q9HC56	N-Term(Diethyl(H)); T3(Hex); T8(Hex)	ETciD	1.60686	1	0	1	1	Heavy	2.19619	0	28.5683	2	712.378	1423.75	0.00388082	48.8717
YSTVGVITVT	Protocadherin-9 OS=Homo sapiens GN=PCDH9 PE=1 SV=2 - [PCDH9_HUMAN]	Q9HC56	N-Term(Diethyl(H)); S2(Hex)	ETciD	1.66337	1	0	1	1	Heavy	2.10324	0	49.1696	2	631.352	1261.7	0.0754146	48.9227
YSTVGVITVTDADAGENK	Protocadherin-9 OS=Homo sapiens GN=PCDH9 PE=1 SV=2 - [PCDH9_HUMAN]	Q9HC56	N-Term(Diethyl); T8(Hex); T10(Hex); K18(Diethyl)	HCD	0.533555	1	0	1	1	Light	2.81524	0	1.98328	2	1138.57	2276.13	1.1746	45.218
YSTVGVITVTDADAGENK	Protocadherin-9 OS=Homo sapiens GN=PCDH9 PE=1 SV=2 - [PCDH9_HUMAN]	Q9HC56	N-Term(Diethyl); T8(Hex); K18(Diethyl)	HCD	0.533545	1	0	1	1	Light	4.48532	0	26.6814	3	705.364	2114.08	0.578897	45.2904
YSTVGVITVTDADAGENK	Protocadherin-9 OS=Homo sapiens GN=PCDH9 PE=1 SV=2 - [PCDH9_HUMAN]	Q9HC56	N-Term(Diethyl); T8(Hex); T10(Hex); K18(Diethyl)	HCD	0.539821	1	0	1	1	Light	2.91437	0	23.3674	2	1138.57	2276.13	0.209245	44.6109
YSTVGVITVTDADAGENK	Protocadherin-9 OS=Homo sapiens GN=PCDH9 PE=1 SV=2 - [PCDH9_HUMAN]	Q9HC56	N-Term(Diethyl); T8(Hex); T10(Hex); K18(Diethyl)	HCD	0.544402	1	0	1	1	Light	3.90381	0	2.8728	3	759.381	2276.13	0.337414	44.6187
YSTVGVITVTDADAGENK	Protocadherin-9 OS=Homo sapiens GN=PCDH9 PE=1 SV=2 - [PCDH9_HUMAN]	Q9HC56	N-Term(Diethyl); T8(Hex); K18(Diethyl)	HCD	0.516788	1	0	1	1	Light	4.88504	0	15.5813	3	705.363	2114.08	0.0592221	44.693
YSTVGVITVTDADAGENK	Protocadherin-9 OS=Homo sapiens GN=PCDH9 PE=1 SV=2 - [PCDH9_HUMAN]	Q9HC56	N-Term(Diethyl); T8(Hex); K18(Diethyl)	HCD	0.351528	1	0	1	1	Light	4.73693	0	24.6821	3	705.363	2114.08	-0.0273905	47.3207
YSTVGVITVTDADAGENK	Protocadherin-9 OS=Homo sapiens GN=PCDH9 PE=1 SV=2 - [PCDH9_HUMAN]	Q9HC56	N-Term(Diethyl); S2(Hex); K18(Diethyl)	HCD	0.375452	1	0	1	1	Light	3.76544	0	26.7539	2	1057.54	2114.08	0.152195	47.3369
YSTVGVITVTDADAGENK	Protocadherin-9 OS=Homo sapiens GN=PCDH9 PE=1 SV=2 - [PCDH9_HUMAN]	Q9HC56	N-Term(Diethyl); T8(Hex); T10(Hex); K18(Diethyl)	HCD	0.524269	1	0	1	1	Light	2.82778	0	0	2	1138.57	2276.13	0.852812	45.2305
YSTVGVITVTDADAGENK	Protocadherin-9 OS=Homo sapiens GN=PCDH9 PE=1 SV=2 - [PCDH9_HUMAN]	Q9HC56	N-Term(Diethyl); T8(Hex); T10(Hex); K18(Diethyl)	HCD	0.513073	1	0	1	1	Light	3.98949	0	10.2855	3	759.381	2276.13	0.337414	45.6079
YSTVGVITVTDADAGENK	Protocadherin-9 OS=Homo sapiens GN=PCDH9 PE=1 SV=2 - [PCDH9_HUMAN]	Q9HC56	N-Term(Diethyl); T8(Hex); T10(Hex); K18(Diethyl)	HCD	0.559569	1	0	1	1	Light	2.8428	0	17.7734	2	1138.57	2276.13	0.960073	45.6099
YSTVGVITVTDADAGENK	Protocadherin-9 OS=Homo sapiens GN=PCDH9 PE=1 SV=2 - [PCDH9_HUMAN]	Q9HC56	N-Term(Diethyl(H)); T8(Hex); T10(Hex); K18(Diethyl(H))	HCD	0.528976	1	0	1	1	Heavy	3.89309	0	18.333	3	762.057	2284.16	0.476606	45.2341
YSTVGVITVTDADAGENK	Protocadherin-9 OS=Homo sapiens GN=PCDH9 PE=1 SV=2 - [PCDH9_HUMAN]	Q9HC56	N-Term(Diethyl(H)); T8(Hex); T10(Hex); K18(Diethyl(H))	HCD	0.482677	1	0	1	1	Heavy	3.9653	0	4.69703	3	762.056	2284.15	-0.0845376	45.3037
LSETIVPPINTATVPDNEDGEAK	SUN domain-containing ossification factor OS=Homo sapiens GN=SUCO PE=2 SV=1 - [SUCO_HUMAN]	Q9UBS9	N-Term(Diethyl); S2(Hex); T4(Hex); T11(Hex); K23(Diethyl)	ETciD	0.424697	1	0	1	1	Light	2.21579	0	9.33712	3	1003.5	3008.49	1.02389	52.7911
LSETIVPPINTATVPDNEDGEAK	SUN domain-containing ossification factor OS=Homo sapiens GN=SUCO PE=2 SV=1 - [SUCO_HUMAN]	Q9UBS9	N-Term(Diethyl(H)); S2(Hex); T4(Hex); T11(Hex); K23(Diethyl(H))	ETciD	0.477483	1	0	1	1	Heavy	4.09336	0	8.74416	3	1006.17	3016.51	0.338344	52.4563
LSETIVPPINTATVPDNEDGEAK	SUN domain-containing ossification factor OS=Homo sapiens GN=SUCO PE=2 SV=1 - [SUCO_HUMAN]	Q9UBS9	N-Term(Diethyl); T4(Hex); T11(Hex); K23(Diethyl)	HCD	0.440323	1	0	1	1	Light	2.5274	0	63.7718	3	949.481	2846.43	0.0200871	54.938
LSETIVPPINTATVPDNEDGEAK	SUN domain-containing ossification factor OS=Homo sapiens GN=SUCO PE=2 SV=1 - [SUCO_HUMAN]	Q9UBS9	N-Term(Diethyl(H)); T4(Hex); T11(Hex); T13(Hex); K23(Diethyl(H))	HCD	0.424697	1	0	1	1	Heavy	3.08431	0	8.59832	3	1006.18	3016.51	1.55236	52.8452
LSETIVPPINTATVPDNEDGEAK	SUN domain-containing ossification factor OS=Homo sapiens GN=SUCO PE=2 SV=1 - [SUCO_HUMAN]	Q9UBS9	N-Term(Diethyl(H)); S2(Hex); T4(Hex); T11(Hex); K23(Diethyl(H))	HCD	0.477483	1	0	1	1	Heavy	3.18107	0	8.74416	3	1006.17	3016.51	0.338344	52.4692
NLVLYPTDAYSH	UPF0606 protein KIAA1549 OS=Homo sapiens GN=KIAA1549 PE=1 SV=4 - [K1549_HUMAN]	Q9HCM3	N-Term(Diethyl); T7(Hex)	ETciD	0.855332	1	0	1	1	Light	2.14924	0	9.07196	2	805.901	1610.8	0.374011	55.3023
NLVLYPTDAYSH	UPF0606 protein KIAA1549 OS=Homo sapiens GN=KIAA1549 PE=1 SV=4 - [K1549_HUMAN]	Q9HCM3	N-Term(Diethyl); T7(Hex)	HCD	0.855332	1	0	1	1	Light	2.83867	0	9.07196	2	805.901	1610.8	0.374011	55.3163

## Sheet: Exp5
Sequence	Protein Descriptions	Protein Group Accessions	Modifications	Activation Type	Ratio (Heavy/Light)	ΔScore	ΔCn	Rank	Search Engine Rank	Quan Channel	XCorr	# Missed Cleavages	Isolation Interference [%]	Charge	m/z [Da]	MH+ [Da]	ΔM [ppm]	RT [min]
DMGGHMGGLSGTTK	Cadherin-11 OS=Homo sapiens GN=CDH11 PE=1 SV=2 - [CAD11_HUMAN]	P55287	N-Term(Diethyl); M2(Oxidation); M6(Oxidation); S10(Hex); T12(Hex); K14(Diethyl)	ETciD	0.494682	1	0	1	1	Light	4.43146	0	7.96336	3	606.278	1816.82	0.283994	17.3379
SNVGTSVIQVTASDADDPTYGNSAK	Cadherin-11 OS=Homo sapiens GN=CDH11 PE=1 SV=2 - [CAD11_HUMAN]	P55287	N-Term(Diethyl); S6(Hex); S13(Hex); K25(Diethyl)	ETciD	0.478571	1	0	1	1	Light	1.88234	0	50.2486	3	978.472	2933.4	0.473489	44.024
SNVGTSVIQVTASDADDPTYGNSAK	Cadherin-11 OS=Homo sapiens GN=CDH11 PE=1 SV=2 - [CAD11_HUMAN]	P55287	N-Term(Diethyl); T5(Hex); T11(Hex); K25(Diethyl)	HCD	0.478571	1	0	1	1	Light	3.43904	0	50.2486	3	978.472	2933.4	0.473489	44.0356
GIQHPPQSTATVSVTVIDVNENPYFAPNPK	Cadherin-2 OS=Homo sapiens GN=CDH2 PE=1 SV=4 - [CADH2_HUMAN]	P19022	N-Term(Diethyl); T9(Hex); T11(Hex); S13(Hex); T15(Hex); K30(Diethyl)	ETciD	1.0694	1	0	1	1	Light	2.60869	0	8.37497	4	995.998	3980.97	1.91939	61.5861
GIQHPPQSTATVSVTVIDVNENPYFAPNPK	Cadherin-2 OS=Homo sapiens GN=CDH2 PE=1 SV=4 - [CADH2_HUMAN]	P19022	N-Term(Diethyl); T9(Hex); T11(Hex); S13(Hex); T15(Hex); K30(Diethyl)	ETciD	0.446692	1	0	1	1	Light	3.33909	0	0	3	1327.66	3980.97	1.41682	59.2841
GIQHPPQSTATVSVTVIDVNENPYFAPNPK	Cadherin-2 OS=Homo sapiens GN=CDH2 PE=1 SV=4 - [CADH2_HUMAN]	P19022	N-Term(Diethyl); T9(Hex); T11(Hex); S13(Hex); T15(Hex); K30(Diethyl)	ETciD	0.429167	1	0	1	1	Light	5.12906	0	6.19745	4	995.997	3980.97	0.447542	68.4051
GIQHPPQSTATVSVTVIDVNENPY	Cadherin-2 OS=Homo sapiens GN=CDH2 PE=1 SV=4 - [CADH2_HUMAN]	P19022	N-Term(Diethyl); T9(Hex); T11(Hex); T15(Hex)	ETciD	1.91538	1	0	1	1	Light	2.63243	0	65.4367	3	1036.84	3108.5	0.102219	52.4956
GIQHPPQSTATVSVTVIDVNENPYFAPNPK	Cadherin-2 OS=Homo sapiens GN=CDH2 PE=1 SV=4 - [CADH2_HUMAN]	P19022	N-Term(Diethyl(H)); T9(Hex); T11(Hex); S13(Hex); T15(Hex); K30(Diethyl(H))	ETciD	0.431819	1	0	1	1	Heavy	5.32773	0	41.1313	4	998.005	3989	1.9194	59.3782
GIQHPPQSTATVSVTVIDVNENPYFAPNPK	Cadherin-2 OS=Homo sapiens GN=CDH2 PE=1 SV=4 - [CADH2_HUMAN]	P19022	N-Term(Diethyl(H)); T9(Hex); T11(Hex); S13(Hex); T15(Hex); K30(Diethyl(H))	ETciD	0.440488	1	0	1	1	Heavy	2.81139	0	34.7748	3	1330.33	3988.99	-0.112243	68.5715
GIQHPPQSTATVSVTVIDVNENPYFAPNPK	Cadherin-2 OS=Homo sapiens GN=CDH2 PE=1 SV=4 - [CADH2_HUMAN]	P19022	N-Term(Diethyl); S8(Hex); T9(Hex); T11(Hex); S13(Hex); K30(Diethyl)	HCD	1.5134	1	0	1	1	Light	2.24555	0	79.2632	3	1327.66	3980.97	1.04886	61.5905
GIQHPPQSTATVSVTVIDVNENPYFAPNPK	Cadherin-2 OS=Homo sapiens GN=CDH2 PE=1 SV=4 - [CADH2_HUMAN]	P19022	N-Term(Diethyl); S8(Hex); T9(Hex); T11(Hex); S13(Hex); K30(Diethyl)	HCD	1.0694	1	0	1	1	Light	3.0725	0	8.37497	4	995.998	3980.97	1.91939	61.5982
GIQHPPQSTATVSVTVIDVNENPYFAPNPK	Cadherin-2 OS=Homo sapiens GN=CDH2 PE=1 SV=4 - [CADH2_HUMAN]	P19022	N-Term(Diethyl); T9(Hex); T11(Hex); S13(Hex); T15(Hex); K30(Diethyl)	HCD	0.429167	1	0	1	1	Light	4.35957	0	6.19745	4	995.997	3980.97	0.447542	68.4168
GIQHPPQSTATVSVTVIDVNENPY	Cadherin-2 OS=Homo sapiens GN=CDH2 PE=1 SV=4 - [CADH2_HUMAN]	P19022	N-Term(Diethyl); T9(Hex); T11(Hex); S13(Hex)	HCD	1.29248	1	0	1	1	Light	2.6641	0	55.8996	3	1036.84	3108.5	0.926885	54.6883
GIQHPPQSTATVSVTVIDVNENPYFAPNPK	Cadherin-2 OS=Homo sapiens GN=CDH2 PE=1 SV=4 - [CADH2_HUMAN]	P19022	N-Term(Diethyl(H)); T9(Hex); T11(Hex); S13(Hex); T15(Hex); K30(Diethyl(H))	HCD	0.446692	1	0	1	1	Heavy	4.18647	0	52.3122	3	1330.34	3988.99	-0.0204379	59.404
GIQHPPQSTATVSVTVIDVNENPYFAPNPK	Cadherin-2 OS=Homo sapiens GN=CDH2 PE=1 SV=4 - [CADH2_HUMAN]	P19022	N-Term(Diethyl(H)); T9(Hex); T11(Hex); S13(Hex); T15(Hex); K30(Diethyl(H))	HCD	0.431819	1	0	1	1	Heavy	3.92333	0	6.40336	4	998.002	3988.99	-1.20198	59.4224
GIQHPPQSTATVSVTVIDVNENPYFAPNPK	Cadherin-2 OS=Homo sapiens GN=CDH2 PE=1 SV=4 - [CADH2_HUMAN]	P19022	N-Term(Diethyl(H)); T9(Hex); T11(Hex); S13(Hex); T15(Hex); K30(Diethyl(H))	HCD	0.440488	1	0	1	1	Heavy	4.62588	0	19.612	3	1330.34	3989	1.72386	68.7723
DMGGHSGGLSGTTTLTVTLTDVNDNPPK	Cadherin-8 OS=Homo sapiens GN=CDH8 PE=1 SV=2 - [CADH8_HUMAN]	P55286	N-Term(Diethyl); M2(Oxidation); S6(Hex); S10(Hex); T12(Hex); T13(Hex); T14(Hex); K28(Diethyl)	HCD	0.197565	1	0	1	1	Light	4.131	0	0	3	1241.91	3723.72	0.278058	45.9075
DMGGHSGGLSGTTTLTVTLTDVNDNPPK	Cadherin-8 OS=Homo sapiens GN=CDH8 PE=1 SV=2 - [CADH8_HUMAN]	P55286	N-Term(Diethyl); S6(Hex); S10(Hex); T12(Hex); T13(Hex); T14(Hex); K28(Diethyl)	HCD	0.222014	1	0	1	1	Light	3.77163	0	26.3124	3	1236.58	3707.73	1.44289	49.6978
TCTGTLGIILQDVNDNSPFIPK	Desmocollin-2 OS=Homo sapiens GN=DSC2 PE=1 SV=1 - [DSC2_HUMAN]	Q02487	T1(Hex); N-Term(Diethyl); C2(Carbamidomethyl); T3(Hex); T5(Hex); K22(Diethyl)	ETciD	0.513827	1	0	1	1	Light	2.65355	0	0.835748	3	1001.18	3001.51	1.57992	75.5233
TCTGTLGIILQDVNDNSPFIPK	Desmocollin-2 OS=Homo sapiens GN=DSC2 PE=1 SV=1 - [DSC2_HUMAN]	Q02487	T1(Hex); N-Term(Diethyl); C2(Carbamidomethyl); T3(Hex); T5(Hex); K22(Diethyl)	ETciD	0.51528	1	0	1	1	Light	4.77841	0	11.1207	3	1001.17	3001.51	-0.250214	75.8587
TCTGTLGIILQDVNDNSPFIPK	Desmocollin-2 OS=Homo sapiens GN=DSC2 PE=1 SV=1 - [DSC2_HUMAN]	Q02487	T1(Hex); N-Term(Diethyl); C2(Carbamidomethyl); T3(Hex); T5(Hex); K22(Diethyl)	ETciD	0.524419	1	0	1	1	Light	6.66089	0	82.6156	4	751.133	3001.51	1.14841	75.9335
TCTGTLGIILQDVNDNSPFIPK	Desmocollin-2 OS=Homo sapiens GN=DSC2 PE=1 SV=1 - [DSC2_HUMAN]	Q02487	T1(Hex); N-Term(Diethyl(H)); C2(Carbamidomethyl); T3(Hex); T5(Hex); K22(Diethyl(H))	ETciD	0.397357	1	0	1	1	Heavy	4.25871	0	6.52606	3	1003.85	3009.53	-0.325529	82.2955
TCTGTLGIILQDVNDNSPFIPK	Desmocollin-2 OS=Homo sapiens GN=DSC2 PE=1 SV=1 - [DSC2_HUMAN]	Q02487	T1(Hex); N-Term(Diethyl); C2(Carbamidomethyl); T3(Hex); T5(Hex); K22(Diethyl)	HCD	0.513827	1	0	1	1	Light	3.83325	0	0.835748	3	1001.18	3001.51	1.57992	75.5346
TCTGTLGIILQDVNDNSPFIPK	Desmocollin-2 OS=Homo sapiens GN=DSC2 PE=1 SV=1 - [DSC2_HUMAN]	Q02487	T1(Hex); N-Term(Diethyl); C2(Carbamidomethyl); T3(Hex); T5(Hex); K22(Diethyl)	HCD	0.460031	1	0	1	1	Light	2.52	0	14.0301	4	751.133	3001.51	1.88046	75.5896
TCTGTLGIILQDVNDNSPFIPK	Desmocollin-2 OS=Homo sapiens GN=DSC2 PE=1 SV=1 - [DSC2_HUMAN]	Q02487	T1(Hex); N-Term(Diethyl); C2(Carbamidomethyl); T3(Hex); T5(Hex); K22(Diethyl)	HCD	0.51528	1	0	1	1	Light	3.87325	0	11.1207	3	1001.17	3001.51	-0.250214	75.8718
TCTGTLGIILQDVNDNSPFIPK	Desmocollin-2 OS=Homo sapiens GN=DSC2 PE=1 SV=1 - [DSC2_HUMAN]	Q02487	T1(Hex); N-Term(Diethyl); C2(Carbamidomethyl); T3(Hex); T5(Hex); K22(Diethyl)	HCD	0.480532	1	0	1	1	Light	3.57608	0	0	2	1501.26	3001.51	-0.0220508	75.8886
TCTGTLGIILQDVNDNSPFIPK	Desmocollin-2 OS=Homo sapiens GN=DSC2 PE=1 SV=1 - [DSC2_HUMAN]	Q02487	T1(Hex); N-Term(Diethyl); C2(Carbamidomethyl); T3(Hex); T5(Hex); K22(Diethyl)	HCD	0.524419	1	0	1	1	Light	3.47158	0	82.6156	4	751.133	3001.51	1.14841	75.942
TCTGTLGIILQDVNDNSPFIPK	Desmocollin-2 OS=Homo sapiens GN=DSC2 PE=1 SV=1 - [DSC2_HUMAN]	Q02487	T1(Hex); N-Term(Diethyl); C2(Carbamidomethyl); T3(Hex); T5(Hex); K22(Diethyl)	HCD	0.397357	1	0	1	1	Light	3.73951	0	0	3	1001.17	3001.51	0.725858	82.214
KTITGTV	Desmoglein-2 OS=Homo sapiens GN=DSG2 PE=1 SV=2 - [DSG2_HUMAN]	Q14126	K1(Diethyl(H)); N-Term(Diethyl(H)); T2(Hex); T4(Hex); T6(Hex)	ETciD	0.931521	1	0	1	1	Heavy	1.78789	1	0	2	663.374	1325.74	0.429213	21.3853
KTITGTVLINVEDINDNCPT	Desmoglein-2 OS=Homo sapiens GN=DSG2 PE=1 SV=2 - [DSG2_HUMAN]	Q14126	K1(Diethyl(H)); N-Term(Diethyl(H)); T2(Hex); T4(Hex); T6(Hex); C18(Carbamidomethyl)	ETciD	1.01293	1	0	1	1	Heavy	3.10555	1	0	3	941.811	2823.42	0.0376444	56.2823
KTITGTVLINVEDINDNCPT	Desmoglein-2 OS=Homo sapiens GN=DSG2 PE=1 SV=2 - [DSG2_HUMAN]	Q14126	K1(Diethyl(H)); N-Term(Diethyl(H)); T2(Hex); T4(Hex); T6(Hex); C18(Carbamidomethyl)	HCD	0.932275	1	0	1	1	Heavy	2.98074	1	8.8939	2	1412.22	2823.42	1.96636	56.2355
KTITGTVLINVEDINDNCPTLIEPVQTICHDAE	Desmoglein-2 OS=Homo sapiens GN=DSG2 PE=1 SV=2 - [DSG2_HUMAN]	Q14126	K1(Diethyl(H)); N-Term(Diethyl(H)); T2(Hex); T4(Hex); T6(Hex); C18(Carbamidomethyl); C29(Carbamidomethyl)	HCD	0.734789	1	0	1	1	Heavy	4.21806	1	8.48293	3	1443.72	4329.14	2.0293	72.0113
FSTCLSSK	Disintegrin and metalloproteinase domain-containing protein 22 OS=Homo sapiens GN=ADAM22 PE=1 SV=1 - [ADA22_HUMAN]	Q9P0K1	N-Term(Diethyl(H)); S2(Hex); C4(Carbamidomethyl); K8(Diethyl(H))	ETciD	2646.25	1	0	1	1	Heavy	1.69485	0	18.6481	2	606.326	1211.65	0.495112	26.7616
FSTCLSSK	Disintegrin and metalloproteinase domain-containing protein 22 OS=Homo sapiens GN=ADAM22 PE=1 SV=1 - [ADA22_HUMAN]	Q9P0K1	N-Term(Diethyl(H)); T3(Hex); C4(Carbamidomethyl); K8(Diethyl(H))	ETciD	3433.64	1	0	1	1	Heavy	1.73931	0	31.7198	2	606.326	1211.65	0.696607	30.2026
YGPMAGGTLLTLTGNYLNSGNSR	Hepatocyte growth factor receptor OS=Homo sapiens GN=MET PE=1 SV=4 - [MET_HUMAN]	P08581	N-Term(Diethyl(H)); M4(Oxidation); T11(Hex)	ETciD	408.09	1	0	1	1	Heavy	2.00607	0	36.5749	3	865.765	2595.28	0.32913	69.0619
YGPMAGGTLLTLTGNY	Hepatocyte growth factor receptor OS=Homo sapiens GN=MET PE=1 SV=4 - [MET_HUMAN]	P08581	N-Term(Diethyl(H)); M4(Oxidation); T11(Hex)	ETciD	507.912	1	0	1	1	Heavy	1.85937	0	8.97576	2	933.965	1866.92	0.17726	67.9915
LTICGWDFG	Hepatocyte growth factor receptor OS=Homo sapiens GN=MET PE=1 SV=4 - [MET_HUMAN]	P08581	N-Term(Diethyl(H)); T2(Hex); C4(Carbamidomethyl)	ETciD	610.841	1	0	1	1	Heavy	2.07005	0	32.8294	2	645.809	1290.61	0.359793	84.5466
YGPMAGGTLLTLTGNYLNSGNSR	Hepatocyte growth factor receptor OS=Homo sapiens GN=MET PE=1 SV=4 - [MET_HUMAN]	P08581	N-Term(Diethyl(H)); M4(Oxidation); T11(Hex)	HCD	408.09	1	0	1	1	Heavy	4.6	0	36.5749	3	865.765	2595.28	0.32913	69.0714
YGPMAGGTLLTLTGNYLNSGN	Hepatocyte growth factor receptor OS=Homo sapiens GN=MET PE=1 SV=4 - [MET_HUMAN]	P08581	N-Term(Diethyl(H)); M4(Oxidation); S19(Hex)	HCD	318.994	1	0	1	1	Heavy	3.31565	0	0	2	1176.58	2352.15	0.901584	72.9892
IDPEWSINSGGTLLTVTGTN	Plexin-A1 OS=Homo sapiens GN=PLXNA1 PE=1 SV=3 - [PLXA1_HUMAN]	Q9UIW2	N-Term(Diethyl(H)); T15(Hex)	ETciD	1695	1	0	1	1	Heavy	1.70702	0	0	2	1149.08	2297.16	0.182645	73.6315
IDPEWSINSGGTLLTVTGTN	Plexin-A1 OS=Homo sapiens GN=PLXNA1 PE=1 SV=3 - [PLXA1_HUMAN]	Q9UIW2	N-Term(Diethyl(H)); T15(Hex)	HCD	1695	1	0	1	1	Heavy	4.36245	0	0	2	1149.08	2297.16	0.182645	73.643
IDPEWSINSGGTLLTVTGTN	Plexin-A1 OS=Homo sapiens GN=PLXNA1 PE=1 SV=3 - [PLXA1_HUMAN]	Q9UIW2	N-Term(Diethyl(H)); T15(Hex)	HCD	505.46	1	0	1	1	Heavy	3.83553	0	0	2	1149.08	2297.16	0.501483	75.9371
AIEPLSGPLDGGTLLTIR	Plexin-D1 OS=Homo sapiens GN=PLXND1 PE=1 SV=3 - [PLXD1_HUMAN]	Q9Y4D7	N-Term(Diethyl(H)); T16(Hex)	HCD	490.586	1	0	1	1	Heavy	3.61023	0	0	2	1023.08	2045.16	-0.506726	75.9296
YGVSGYPTLK	Protein disulfide-isomerase A3 OS=Homo sapiens GN=PDIA3 PE=1 SV=4 - [PDIA3_HUMAN]	P30101	N-Term(Diethyl); S4(Hex); K10(Diethyl)	ETciD	0.465214	1	0	1	1	Light	1.75921	0	39.0891	2	679.877	1358.75	0.915793	47.1316
YGVSGYPTLK	Protein disulfide-isomerase A3 OS=Homo sapiens GN=PDIA3 PE=1 SV=4 - [PDIA3_HUMAN]	P30101	N-Term(Diethyl); S4(Hex); K10(Diethyl)	ETciD	0.516132	1	0	1	1	Light	2.19021	0	0.700984	2	679.876	1358.75	0.19707	46.9616
YGVSGYPTLK	Protein disulfide-isomerase A3 OS=Homo sapiens GN=PDIA3 PE=1 SV=4 - [PDIA3_HUMAN]	P30101	N-Term(Diethyl(H)); S4(Hex); K10(Diethyl(H))	ETciD	0.395465	1	0	1	1	Heavy	2.00715	0	25.665	2	683.89	1366.77	0.475168	47.5641
YVTAVDRDSGR	Protocadherin Fat 1 OS=Homo sapiens GN=FAT1 PE=1 SV=2 - [FAT1_HUMAN]	Q14517	N-Term(Diethyl(H)); T3(Hex)	ETciD	1.51168	1	0	1	1	Heavy	2.9133	1	51.4484	3	487.585	1460.74	0.348526	19.4399
YVTAVDRDSGR	Protocadherin Fat 1 OS=Homo sapiens GN=FAT1 PE=1 SV=2 - [FAT1_HUMAN]	Q14517	N-Term(Diethyl(H)); T3(Hex)	ETciD	1.74729	1	0	1	1	Heavy	2.22711	1	10.6718	2	730.874	1460.74	-0.185457	19.524
VSATDADIGTNGEFYYSFK	Protocadherin Fat 1 OS=Homo sapiens GN=FAT1 PE=1 SV=2 - [FAT1_HUMAN]	Q14517	N-Term(Diethyl); T4(Hex); T10(Hex); K19(Diethyl)	HCD	2.06459	1	0	1	1	Light	2.4595	0	0	2	1261.09	2521.18	-0.126422	62.9223
IGTSVLQVTAR	Protocadherin Fat 3 OS=Homo sapiens GN=FAT3 PE=2 SV=2 - [FAT3_HUMAN]	Q8TDW7	N-Term(Diethyl); T3(Hex); T9(Hex)	ETciD	0.45627	1	0	1	1	Light	1.86758	0	0	2	762.923	1524.84	1.09992	39.7106
SSDKGSPSQSTSVK	Protocadherin Fat 4 OS=Homo sapiens GN=FAT4 PE=1 SV=2 - [FAT4_HUMAN]	Q6V0I7	N-Term(Diethyl); K4(Diethyl); S10(Hex); S12(Hex); K14(Diethyl)	ETciD	0.117696	1	0	1	1	Light	3.22263	1	3.16467	3	629.662	1886.97	0.546236	15.0526
TGTALLTIR	Protocadherin-10 OS=Homo sapiens GN=PCDH10 PE=2 SV=2 - [PCD10_HUMAN]	Q9P2E7	N-Term(Diethyl(H)); T1(Hex); T3(Hex)	ETciD	0.628856	1	0	1	1	Heavy	2.13325	0	26.4825	2	665.382	1329.76	1.35655	41.1242
AELGQQTGTATVR	Protocadherin-16 OS=Homo sapiens GN=DCHS1 PE=2 SV=1 - [PCD16_HUMAN]	Q96JQ0	N-Term(Diethyl); T7(Hex); T9(Hex); T11(Hex)	ETciD	0.61465	1	0	1	1	Light	1.97515	0	1.34308	2	937.46	1873.91	0.531747	21.4027
AELGQQTGTATVR	Protocadherin-16 OS=Homo sapiens GN=DCHS1 PE=2 SV=1 - [PCD16_HUMAN]	Q96JQ0	N-Term(Diethyl); T7(Hex); T9(Hex); T11(Hex)	HCD	0.61465	1	0	1	1	Light	1.97864	0	1.34308	2	937.46	1873.91	0.531747	21.414
SATVQINVK	Protocadherin-17 OS=Homo sapiens GN=PCDH17 PE=2 SV=2 - [PCD17_HUMAN]	O14917	N-Term(Diethyl); S1(Hex); T3(Hex); K9(Diethyl)	ETciD	0.264924	1	0	1	1	Light	1.88363	0	36.2124	2	698.395	1395.78	0.244611	31.3936
SATATVSLFVMDENDNAPTVTLPK	Protocadherin-7 OS=Homo sapiens GN=PCDH7 PE=1 SV=2 - [PCDH7_HUMAN]	O60245	N-Term(Diethyl); S1(Hex); T3(Hex); T5(Hex); S7(Hex); K24(Diethyl)	ETciD	0.276339	1	0	1	1	Light	3.41161	0	77.2813	3	1094.53	3281.59	0.818117	67.0312
SATATVSLFVMDENDNAPTVTLPK	Protocadherin-7 OS=Homo sapiens GN=PCDH7 PE=1 SV=2 - [PCDH7_HUMAN]	O60245	N-Term(Diethyl); S1(Hex); T3(Hex); T5(Hex); S7(Hex); K24(Diethyl)	HCD	0.276339	1	0	1	1	Light	3.84391	0	77.2813	3	1094.53	3281.59	0.818117	67.0442
YSTVGVITVTDADAGENK	Protocadherin-9 OS=Homo sapiens GN=PCDH9 PE=1 SV=2 - [PCDH9_HUMAN]	Q9HC56	N-Term(Diethyl); T3(Hex); T8(Hex); K18(Diethyl)	ETciD	0.554193	1	0	1	1	Light	3.46646	0	9.72889	3	759.381	2276.13	0.659197	45.4699
YSTVGVITVTDADAGENK	Protocadherin-9 OS=Homo sapiens GN=PCDH9 PE=1 SV=2 - [PCDH9_HUMAN]	Q9HC56	N-Term(Diethyl); T3(Hex); T8(Hex); K18(Diethyl)	ETciD	0.64972	1	0	1	1	Light	5.33856	0	7.42812	3	759.382	2276.13	0.980981	44.8916
YSTVGVITVTDADAGENK	Protocadherin-9 OS=Homo sapiens GN=PCDH9 PE=1 SV=2 - [PCDH9_HUMAN]	Q9HC56	N-Term(Diethyl); T3(Hex); T8(Hex); K18(Diethyl)	ETciD	0.611869	1	0	1	1	Light	2.18949	0	1.06188	2	1138.57	2276.13	0.745551	45.2416
YSTVGVITVTDADAGENK	Protocadherin-9 OS=Homo sapiens GN=PCDH9 PE=1 SV=2 - [PCDH9_HUMAN]	Q9HC56	N-Term(Diethyl); T8(Hex); T10(Hex); K18(Diethyl)	HCD	0.554193	1	0	1	1	Light	3.54259	0	9.72889	3	759.381	2276.13	0.659197	45.4817
YSTVGVITVTDADAGENK	Protocadherin-9 OS=Homo sapiens GN=PCDH9 PE=1 SV=2 - [PCDH9_HUMAN]	Q9HC56	N-Term(Diethyl); T8(Hex); T10(Hex); K18(Diethyl)	HCD	0.531387	1	0	1	1	Light	2.41123	0	2.68807	2	1138.57	2276.13	1.06733	45.5251
YSTVGVITVTDADAGENK	Protocadherin-9 OS=Homo sapiens GN=PCDH9 PE=1 SV=2 - [PCDH9_HUMAN]	Q9HC56	N-Term(Diethyl); S2(Hex); T3(Hex); K18(Diethyl)	HCD	0.611869	1	0	1	1	Light	2.89389	0	16.3523	2	1138.57	2276.13	0.423767	44.8779
YSTVGVITVTDADAGENK	Protocadherin-9 OS=Homo sapiens GN=PCDH9 PE=1 SV=2 - [PCDH9_HUMAN]	Q9HC56	N-Term(Diethyl); T8(Hex); T10(Hex); K18(Diethyl)	HCD	0.64972	1	0	1	1	Light	4.15921	0	7.42812	3	759.382	2276.13	0.980981	44.9044
YSTVGVITVTDADAGENK	Protocadherin-9 OS=Homo sapiens GN=PCDH9 PE=1 SV=2 - [PCDH9_HUMAN]	Q9HC56	N-Term(Diethyl); S2(Hex); T3(Hex); K18(Diethyl)	HCD	0.655562	1	0	1	1	Light	2.68365	0	18.4004	2	1138.57	2276.13	0.63829	50.6073
NLVLYPTDAYSH	UPF0606 protein KIAA1549 OS=Homo sapiens GN=KIAA1549 PE=1 SV=4 - [K1549_HUMAN]	Q9HCM3	N-Term(Diethyl(H)); T7(Hex)	ETciD	1.056	1	0	1	1	Heavy	1.99524	0	18.4252	2	807.908	1614.81	0.151088	56.1444

## Sheet: Exp6
Sequence	Protein Descriptions	Protein Group Accessions	Modifications	Activation Type	Ratio(Heavy/Light)	ΔScore	ΔCn	Rank	Search Engine Rank	Quan Channel	XCorr	# Missed Cleavages	Isolation Interference [%]	Charge	m/z [Da]	MH+ [Da]	ΔM [ppm]	RT [min]
sNVGtSVIQVtASDADDPtYGNSAk	Cadherin-11 OS=Homo sapiens GN=CDH11 PE=1 SV=2 - [CAD11_HUMAN]	P55287	N-Term(Diethyl); T5(Hex); T11(Hex); T19(Hex); K25(Diethyl)	ETciD	0.880688	1	0	1	1	Light	3.89942	0	1.82641	3	1032.49	3095.45	0.538054	41.5871
gHmGGLsGtTk	Cadherin-11 OS=Homo sapiens GN=CDH11 PE=1 SV=2 - [CAD11_HUMAN]	P55287	N-Term(Diethyl); M3(Oxidation); S7(Hex); T9(Hex); K11(Diethyl)	ETciD	1.25448	1	0	1	1	Light	3.454	0	4.59608	3	499.917	1497.74	0.305891	14.1612
sNVGtSVIQVtASDADDPTYGNSAk	Cadherin-11 OS=Homo sapiens GN=CDH11 PE=1 SV=2 - [CAD11_HUMAN]	P55287	N-Term(Diethyl(H)); T5(Hex); T11(Hex); K25(Diethyl(H))	ETciD	0.903875	1	0	1	1	Heavy	3.94923	0	11.1368	3	981.147	2941.43	0.0209523	42.8565
sNVGTsVIQVTAsDADDPTYGNSAk	Cadherin-11 OS=Homo sapiens GN=CDH11 PE=1 SV=2 - [CAD11_HUMAN]	P55287	N-Term(Diethyl); S1(Hex); S6(Hex); S13(Hex); K25(Diethyl)	HCD	0.938365	1	0	1	1	Light	3.54607	0	8.07358	3	1032.49	3095.46	0.774665	41.4037
sNVGTsVIQVTAsDADDPTYGNSAk	Cadherin-11 OS=Homo sapiens GN=CDH11 PE=1 SV=2 - [CAD11_HUMAN]	P55287	N-Term(Diethyl(H)); S1(Hex); S6(Hex); S13(Hex); K25(Diethyl(H))	HCD	0.880688	1	0	1	1	Heavy	3.4572	0	6.30408	3	1035.17	3103.48	0.81698	41.6023
sNVGtSVIQVtASDADDPTYGNSAk	Cadherin-11 OS=Homo sapiens GN=CDH11 PE=1 SV=2 - [CAD11_HUMAN]	P55287	N-Term(Diethyl(H)); T5(Hex); T11(Hex); K25(Diethyl(H))	HCD	0.903875	1	0	1	1	Heavy	5.01392	0	11.1368	3	981.147	2941.43	0.0209523	42.8705
sNVGtSVIQVtASDADDPtYGNSAk	Cadherin-11 OS=Homo sapiens GN=CDH11 PE=1 SV=2 - [CAD11_HUMAN]	P55287	N-Term(Diethyl(H)); T5(Hex); T11(Hex); T19(Hex); K25(Diethyl(H))	HCD	0.935686	1	0	1	1	Heavy	3.08949	0	0	2	1552.24	3103.48	0.329646	41.4001
sNVGtSVIQVtASDADDPTYGNSAk	Cadherin-11 OS=Homo sapiens GN=CDH11 PE=1 SV=2 - [CAD11_HUMAN]	P55287	N-Term(Diethyl(H)); T5(Hex); T11(Hex); K25(Diethyl(H))	HCD	0.929129	1	0	1	1	Heavy	5.15404	0	28.3954	3	981.146	2941.42	-0.912807	42.6157
sNVGTsVIQVTASDADDPTYGNSAk	Cadherin-11 OS=Homo sapiens GN=CDH11 PE=1 SV=2 - [CAD11_HUMAN]	P55287	N-Term(Diethyl(H)); S1(Hex); S6(Hex); K25(Diethyl(H))	HCD	0.854067	1	0	1	1	Heavy	2.85198	0	5.48591	2	1471.22	2941.43	0.295276	42.6668
gIQHPPQStAtVsVtVIDVNENPYFAPNPk	Cadherin-2 OS=Homo sapiens GN=CDH2 PE=1 SV=4 - [CADH2_HUMAN]	P19022	N-Term(Diethyl); T9(Hex); T11(Hex); S13(Hex); T15(Hex); K30(Diethyl)	ETciD	1.3429	1	0	1	1	Light	4.29618	0	0	3	1327.66	3980.97	1.14085	55.2716
gIQHPPQStAtVsVtVIDVNENPYFAPNPk	Cadherin-2 OS=Homo sapiens GN=CDH2 PE=1 SV=4 - [CADH2_HUMAN]	P19022	N-Term(Diethyl); T9(Hex); T11(Hex); S13(Hex); T15(Hex); K30(Diethyl)	ETciD	1.42828	1	0	1	1	Light	5.93183	0	1.04697	4	995.998	3980.97	1.61275	55.276
gIQHPPQStAtVsVtVIDVNENPYFAPNPk	Cadherin-2 OS=Homo sapiens GN=CDH2 PE=1 SV=4 - [CADH2_HUMAN]	P19022	N-Term(Diethyl); T9(Hex); T11(Hex); S13(Hex); T15(Hex); K30(Diethyl)	ETciD	1.32383	0.5348	0	1	1	Light	6.03637	0	52.5141	5	797	3980.97	1.28741	55.3215
gIQHPPQStAtVsVTVIDVNENPYFAPNPk	Cadherin-2 OS=Homo sapiens GN=CDH2 PE=1 SV=4 - [CADH2_HUMAN]	P19022	N-Term(Diethyl); T9(Hex); T11(Hex); S13(Hex); K30(Diethyl)	ETciD	1.2348	1	0	1	1	Light	3.64691	0	45.3343	3	1273.64	3818.92	1.11683	57.1148
gIQHPPQStAtVsVTVIDVNENPYFAPNPk	Cadherin-2 OS=Homo sapiens GN=CDH2 PE=1 SV=4 - [CADH2_HUMAN]	P19022	N-Term(Diethyl); T9(Hex); T11(Hex); S13(Hex); K30(Diethyl)	ETciD	1.2565	1	0	1	1	Light	5.75545	0	33.6212	4	955.481	3818.9	-1.93932	57.1321
gIQHPPQStAtVsVtVIDVNENPYFAPNPk	Cadherin-2 OS=Homo sapiens GN=CDH2 PE=1 SV=4 - [CADH2_HUMAN]	P19022	N-Term(Diethyl(H)); T9(Hex); T11(Hex); S13(Hex); T15(Hex); K30(Diethyl(H))	ETciD	1.38476	1	0	1	1	Heavy	5.37577	0	83.3177	4	998.003	3988.99	-0.0391097	62.607
gIQHPPQStAtVsVtVIDVNENPYFAPNPk	Cadherin-2 OS=Homo sapiens GN=CDH2 PE=1 SV=4 - [CADH2_HUMAN]	P19022	N-Term(Diethyl(H)); T9(Hex); T11(Hex); S13(Hex); T15(Hex); K30(Diethyl(H))	ETciD	1.31413	1	0	1	1	Heavy	3.54181	0	2.90659	3	1330.33	3988.99	-0.571271	62.7491
gIQHPPQStAtVsVtVIDVNENPYFAPNPk	Cadherin-2 OS=Homo sapiens GN=CDH2 PE=1 SV=4 - [CADH2_HUMAN]	P19022	N-Term(Diethyl(H)); T9(Hex); T11(Hex); S13(Hex); T15(Hex); K30(Diethyl(H))	ETciD	1.2341	1	0	1	1	Heavy	3.69582	0	0	3	1330.34	3988.99	0.0713675	69.9987
gIQHPPQStA	Cadherin-2 OS=Homo sapiens GN=CDH2 PE=1 SV=4 - [CADH2_HUMAN]	P19022	N-Term(Diethyl(H)); T9(Hex)	ETciD	4.01847	1	0	1	1	Heavy	1.81786	0	8.30312	2	629.329	1257.65	0.0135685	19.4061
gIQHPPQStAtVsVtVIDVNENPYFAPNPk	Cadherin-2 OS=Homo sapiens GN=CDH2 PE=1 SV=4 - [CADH2_HUMAN]	P19022	N-Term(Diethyl); T9(Hex); T11(Hex); S13(Hex); T15(Hex); K30(Diethyl)	HCD	1.42828	1	0	1	1	Light	3.83783	0	1.04697	4	995.998	3980.97	1.61275	55.286
gIQHPPQStAtVsVtVIDVNENPYFAPNPk	Cadherin-2 OS=Homo sapiens GN=CDH2 PE=1 SV=4 - [CADH2_HUMAN]	P19022	N-Term(Diethyl); T9(Hex); T11(Hex); S13(Hex); T15(Hex); K30(Diethyl)	HCD	1.32383	1	0	1	1	Light	3.50756	0	52.5141	5	797	3980.97	1.28741	55.3322
gIQHPPQStAtVsVtVIDVNENPYFAPNPk	Cadherin-2 OS=Homo sapiens GN=CDH2 PE=1 SV=4 - [CADH2_HUMAN]	P19022	N-Term(Diethyl); T9(Hex); T11(Hex); S13(Hex); T15(Hex); K30(Diethyl)	HCD	1.3429	1	0	1	1	Light	4.38495	0	0	3	1327.66	3980.96	0.220943	55.6894
gIQHPPQStAtVsVtVIDVNENPYFAPNPk	Cadherin-2 OS=Homo sapiens GN=CDH2 PE=1 SV=4 - [CADH2_HUMAN]	P19022	N-Term(Diethyl); T9(Hex); T11(Hex); S13(Hex); T15(Hex); K30(Diethyl)	HCD	1.38476	1	0	1	1	Light	3.90948	0	6.09129	4	995.998	3980.97	1.73541	63.2652
gIQHPPQStAtVSVtVIDVNENPYFAPNPk	Cadherin-2 OS=Homo sapiens GN=CDH2 PE=1 SV=4 - [CADH2_HUMAN]	P19022	N-Term(Diethyl); T9(Hex); T11(Hex); T15(Hex); K30(Diethyl)	HCD	1.27993	1	0	1	1	Light	4.63185	0	6.91244	3	1273.64	3818.92	1.02094	56.9442
gIQHPPQStAtVsVTVIDVNENPYFAPNPk	Cadherin-2 OS=Homo sapiens GN=CDH2 PE=1 SV=4 - [CADH2_HUMAN]	P19022	N-Term(Diethyl(H)); T9(Hex); T11(Hex); S13(Hex); K30(Diethyl(H))	HCD	1.2348	1	0	1	1	Heavy	5.28918	0	23.4242	3	1276.32	3826.94	-0.284963	57.0842
gIQHPPQStAtVsVTVIDVNENPYFAPNPk	Cadherin-2 OS=Homo sapiens GN=CDH2 PE=1 SV=4 - [CADH2_HUMAN]	P19022	N-Term(Diethyl(H)); T9(Hex); T11(Hex); S13(Hex); K30(Diethyl(H))	HCD	1.2565	1	0	1	1	Heavy	4.21928	0	27.6099	4	957.49	3826.94	-0.336323	57.2992
gIQHPPQStAtVsVtVIDVNENPYFAPNPk	Cadherin-2 OS=Homo sapiens GN=CDH2 PE=1 SV=4 - [CADH2_HUMAN]	P19022	N-Term(Diethyl(H)); T9(Hex); T11(Hex); S13(Hex); T15(Hex); K30(Diethyl(H))	HCD	1.31413	1	0	1	1	Heavy	4.12623	0	2.90659	3	1330.33	3988.99	-0.571271	62.7612
gIQHPPQStAtVsVtVIDVNENPYFAPNPk	Cadherin-2 OS=Homo sapiens GN=CDH2 PE=1 SV=4 - [CADH2_HUMAN]	P19022	N-Term(Diethyl(H)); T9(Hex); T11(Hex); S13(Hex); T15(Hex); K30(Diethyl(H))	HCD	1.2341	1	0	1	1	Heavy	4.26812	0	0	3	1330.34	3988.99	0.0713675	70.0114
gIQHPPQStAtVsVtVIDVNENPYFAPNPk	Cadherin-2 OS=Homo sapiens GN=CDH2 PE=1 SV=4 - [CADH2_HUMAN]	P19022	N-Term(Diethyl(H)); T9(Hex); T11(Hex); S13(Hex); T15(Hex); K30(Diethyl(H))	HCD	1.37388	1	0	1	1	Heavy	4.34182	0	23.3034	4	998.003	3988.99	-0.283924	54.8894
gIQHPPQStAtVsVtVIDVNENPYFAPNPk	Cadherin-2 OS=Homo sapiens GN=CDH2 PE=1 SV=4 - [CADH2_HUMAN]	P19022	N-Term(Diethyl(H)); T9(Hex); T11(Hex); S13(Hex); T15(Hex); K30(Diethyl(H))	HCD	1.41001	1	0	1	1	Heavy	4.16781	0	29.5166	5	798.605	3988.99	0.799068	55.1211
gIQHPPQStAtVsVTVIDVNENPYFAPNPk	Cadherin-2 OS=Homo sapiens GN=CDH2 PE=1 SV=4 - [CADH2_HUMAN]	P19022	N-Term(Diethyl(H)); T9(Hex); T11(Hex); S13(Hex); K30(Diethyl(H))	HCD	0.396263	1	0	1	1	Heavy	4.42099	0	22.5723	4	957.489	3826.93	-1.35705	55.3722
gIQHPPQStAtVsVtVIDVNENPYFAPNPk	Cadherin-2 OS=Homo sapiens GN=CDH2 PE=1 SV=4 - [CADH2_HUMAN]	P19022	N-Term(Diethyl(H)); T9(Hex); T11(Hex); S13(Hex); T15(Hex); K30(Diethyl(H))	HCD	1.31713	1	0	1	1	Heavy	4.414	0	3.90298	3	1330.33	3988.99	-0.112243	55.4045
gIQHPPQStAtVsVTVIDVNENPYFAPNPk	Cadherin-2 OS=Homo sapiens GN=CDH2 PE=1 SV=4 - [CADH2_HUMAN]	P19022	N-Term(Diethyl(H)); T9(Hex); T11(Hex); S13(Hex); K30(Diethyl(H))	HCD	1.23793	1	0	1	1	Heavy	3.64886	0	27.6911	4	957.491	3826.94	0.939582	57.0137
gIQHPPQStAtVsVtVIDVNENPYFAPNPk	Cadherin-2 OS=Homo sapiens GN=CDH2 PE=1 SV=4 - [CADH2_HUMAN]	P19022	N-Term(Diethyl(H)); T9(Hex); T11(Hex); S13(Hex); T15(Hex); K30(Diethyl(H))	HCD	1.28013	1	0	1	1	Heavy	4.52166	0	2.24389	3	1330.34	3988.99	0.0713675	63.2804
gIQHPPQStAtVsVtVIDVNENPYFAPNPk	Cadherin-2 OS=Homo sapiens GN=CDH2 PE=1 SV=4 - [CADH2_HUMAN]	P19022	N-Term(Diethyl(H)); T9(Hex); T11(Hex); S13(Hex); T15(Hex); K30(Diethyl(H))	HCD	1.40567	1	0	1	1	Heavy	3.82472	0	7.46099	4	998.003	3988.99	-0.283924	63.2848
fLDGPYTAGVPEmSPVGTSVVQVtAtDADDPtYGNSAR	Cadherin-7 OS=Homo sapiens GN=CDH7 PE=2 SV=2 - [CADH7_HUMAN]	Q9ULB5	N-Term(Diethyl(H)); M13(Oxidation); T24(Hex); T26(Hex); T32(Hex)	ETciD	3.97338	1	0	1	1	Heavy	3.30227	0	21.1412	4	1112.77	4448.04	0.0442136	60.4483
fLDGPYTAGVPEmSPVGtSVVQVtAtDADDPTYGNSAR	Cadherin-7 OS=Homo sapiens GN=CDH7 PE=2 SV=2 - [CADH7_HUMAN]	Q9ULB5	N-Term(Diethyl(H)); M13(Oxidation); T18(Hex); T24(Hex); T26(Hex)	HCD	3.97338	1	0	1	1	Heavy	5.74585	0	21.1412	4	1112.77	4448.04	0.0442136	60.4611
fLDGPYTAGVPEmSPVGtSVVQVtAtDADDPTYGNSAR	Cadherin-7 OS=Homo sapiens GN=CDH7 PE=2 SV=2 - [CADH7_HUMAN]	Q9ULB5	N-Term(Diethyl(H)); M13(Oxidation); T18(Hex); T24(Hex); T26(Hex)	HCD	3.88946	1	0	1	1	Heavy	4.43498	0	10.4947	3	1483.35	4448.03	-1.64055	60.4763
fLDGPYTAGVPEMSPVGtSVVQVtAtDADDPTYGNSAR	Cadherin-7 OS=Homo sapiens GN=CDH7 PE=2 SV=2 - [CADH7_HUMAN]	Q9ULB5	N-Term(Diethyl(H)); T18(Hex); T24(Hex); T26(Hex)	HCD	3.63494	1	0	1	1	Heavy	5.32525	0	25.0662	3	1478.02	4432.05	-0.342496	66.339
fLDGPYTAGVPEmSPVGtSVVQVtAtDADDPTYGNSAR	Cadherin-7 OS=Homo sapiens GN=CDH7 PE=2 SV=2 - [CADH7_HUMAN]	Q9ULB5	N-Term(Diethyl(H)); M13(Oxidation); T18(Hex); T24(Hex); T26(Hex)	HCD	3.84676	1	0	1	1	Heavy	4.85259	0	17.3286	4	1112.77	4448.04	-0.504659	60.332
rQEQSVYYLPIFIVDSGSPsLsstNTLTIR	Cadherin-7 OS=Homo sapiens GN=CDH7 PE=2 SV=2 - [CADH7_HUMAN]	Q9ULB5	N-Term(Diethyl(H)); S20(Hex); S22(Hex); S23(Hex); T24(Hex)	HCD	278.047	1	0	1	1	Heavy	3.99768	1	15.8348	3	1360.69	4080.04	1.59314	76.219
dmGGHsGGLsGtttLTVTLTDVNDNPPk	Cadherin-8 OS=Homo sapiens GN=CDH8 PE=1 SV=2 - [CADH8_HUMAN]	P55286	N-Term(Diethyl); M2(Oxidation); S6(Hex); S10(Hex); T12(Hex); T13(Hex); T14(Hex); K28(Diethyl)	HCD	0.83364	1	0	1	1	Light	3.62546	0	3.79416	3	1241.91	3723.72	0.573095	44.2355
dmGGHSGGLsGtttLtVTLTDVNDNPPk	Cadherin-8 OS=Homo sapiens GN=CDH8 PE=1 SV=2 - [CADH8_HUMAN]	P55286	N-Term(Diethyl); M2(Oxidation); S10(Hex); T12(Hex); T13(Hex); T14(Hex); T16(Hex); K28(Diethyl)	HCD	0.801497	1	0	1	1	Light	3.93124	0	3.69641	4	931.684	3723.72	-0.00419826	44.2532
dMGGHSGGLsGtttLtVTLTDVNDNPPk	Cadherin-8 OS=Homo sapiens GN=CDH8 PE=1 SV=2 - [CADH8_HUMAN]	P55286	N-Term(Diethyl); S10(Hex); T12(Hex); T13(Hex); T14(Hex); T16(Hex); K28(Diethyl)	HCD	0.779343	1	0	1	1	Light	3.32837	0	4.06348	4	927.685	3707.72	-0.256288	47.7387
dmGGHsGGLsGtttLTVTLTDVNDNPPk	Cadherin-8 OS=Homo sapiens GN=CDH8 PE=1 SV=2 - [CADH8_HUMAN]	P55286	N-Term(Diethyl); M2(Oxidation); S6(Hex); S10(Hex); T12(Hex); T13(Hex); T14(Hex); K28(Diethyl)	HCD	0.788546	1	0	1	1	Light	3.75279	0	0	3	1241.91	3723.72	1.55655	48.8459
dmGGHSGGLsGtttLtVTLTDVNDNPPk	Cadherin-8 OS=Homo sapiens GN=CDH8 PE=1 SV=2 - [CADH8_HUMAN]	P55286	N-Term(Diethyl); M2(Oxidation); S10(Hex); T12(Hex); T13(Hex); T14(Hex); T16(Hex); K28(Diethyl)	HCD	0.791076	1	0	1	1	Light	4.74514	0	5.80128	4	931.683	3723.71	-1.24991	44.0279
dMGGHSGGLsGtttLtVTLTDVNDNPPk	Cadherin-8 OS=Homo sapiens GN=CDH8 PE=1 SV=2 - [CADH8_HUMAN]	P55286	N-Term(Diethyl); S10(Hex); T12(Hex); T13(Hex); T14(Hex); T16(Hex); K28(Diethyl)	HCD	0.853385	1	0	1	1	Light	4.25136	0	0	4	927.686	3707.72	0.402178	47.5664
dMGGHsGGLsGtttLTVTLTDVNDNPPk	Cadherin-8 OS=Homo sapiens GN=CDH8 PE=1 SV=2 - [CADH8_HUMAN]	P55286	N-Term(Diethyl); S6(Hex); S10(Hex); T12(Hex); T13(Hex); T14(Hex); K28(Diethyl)	HCD	0.777147	1	0	1	1	Light	3.38374	0	55.5471	3	1236.58	3707.72	1.24535	47.6565
dmGGHsGGLsGtttLTVTLTDVNDNPPk	Cadherin-8 OS=Homo sapiens GN=CDH8 PE=1 SV=2 - [CADH8_HUMAN]	P55286	N-Term(Diethyl); M2(Oxidation); S6(Hex); S10(Hex); T12(Hex); T13(Hex); T14(Hex); K28(Diethyl)	HCD	0.729198	1	0	1	1	Light	3.38926	0	27.8232	3	1241.91	3723.72	1.4582	49.3717
dMGGHsGGLsGtttLTVTLTDVNDNPPk	Cadherin-8 OS=Homo sapiens GN=CDH8 PE=1 SV=2 - [CADH8_HUMAN]	P55286	N-Term(Diethyl(H)); S6(Hex); S10(Hex); T12(Hex); T13(Hex); T14(Hex); K28(Diethyl(H))	HCD	0.789666	1	0	1	1	Heavy	4.35382	0	15.3422	3	1239.25	3715.75	0.491221	47.7237
dmGGHsGGLsGtttLTVTLTDVNDNPPk	Cadherin-8 OS=Homo sapiens GN=CDH8 PE=1 SV=2 - [CADH8_HUMAN]	P55286	N-Term(Diethyl(H)); M2(Oxidation); S6(Hex); S10(Hex); T12(Hex); T13(Hex); T14(Hex); K28(Diethyl(H))	HCD	0.788551	1	0	1	1	Heavy	4.13525	0	4.90773	3	1244.58	3731.74	-0.667024	44.0228
tctGtLGIILQDVNDNSPFIPkk	Desmocollin-2 OS=Homo sapiens GN=DSC2 PE=1 SV=1 - [DSC2_HUMAN]	Q02487	T1(Hex); N-Term(Diethyl); C2(Carbamidomethyl); T3(Hex); T5(Hex); K22(Diethyl); K23(Diethyl)	ETciD	0.487364	1	0	1	1	Light	2.88367	1	53.4814	3	1062.56	3185.67	1.15087	68.3917
tctGtLGIILQDVNDNSPFIPkk	Desmocollin-2 OS=Homo sapiens GN=DSC2 PE=1 SV=1 - [DSC2_HUMAN]	Q02487	T1(Hex); N-Term(Diethyl); C2(Carbamidomethyl); T3(Hex); T5(Hex); K22(Diethyl); K23(Diethyl)	ETciD	0.490272	1	0	1	1	Light	4.19851	1	17.9837	4	797.172	3185.67	0.744303	68.432
tctGtLGIILQDVNDNSPFIPk	Desmocollin-2 OS=Homo sapiens GN=DSC2 PE=1 SV=1 - [DSC2_HUMAN]	Q02487	T1(Hex); N-Term(Diethyl); C2(Carbamidomethyl); T3(Hex); T5(Hex); K22(Diethyl)	ETciD	0.659419	1	0	1	1	Light	4.72934	0	3.05122	3	1001.17	3001.51	0.420836	68.5615
tctGtLGIILQDVNDNSPFIPk	Desmocollin-2 OS=Homo sapiens GN=DSC2 PE=1 SV=1 - [DSC2_HUMAN]	Q02487	T1(Hex); N-Term(Diethyl); C2(Carbamidomethyl); T3(Hex); T5(Hex); K22(Diethyl)	ETciD	0.711399	1	0	1	1	Light	4.86588	0	6.59528	3	1001.17	3001.51	0.359831	73.0361
tctGTLGIILQDVNDNSPFIPk	Desmocollin-2 OS=Homo sapiens GN=DSC2 PE=1 SV=1 - [DSC2_HUMAN]	Q02487	T1(Hex); N-Term(Diethyl); C2(Carbamidomethyl); T3(Hex); K22(Diethyl)	ETciD	0.668976	1	0	1	1	Light	3.6461	0	21.7037	3	947.156	2839.45	-0.168444	73.223
tctGtLGIILQDVNDNSPFIPk	Desmocollin-2 OS=Homo sapiens GN=DSC2 PE=1 SV=1 - [DSC2_HUMAN]	Q02487	T1(Hex); N-Term(Diethyl); C2(Carbamidomethyl); T3(Hex); T5(Hex); K22(Diethyl)	ETciD	0.591776	1	0	1	1	Light	3.15265	0	0	3	1001.17	3001.51	0.298827	82.8591
tctGtLGIILQDVNDNSPFIPk	Desmocollin-2 OS=Homo sapiens GN=DSC2 PE=1 SV=1 - [DSC2_HUMAN]	Q02487	T1(Hex); N-Term(Diethyl(H)); C2(Carbamidomethyl); T3(Hex); T5(Hex); K22(Diethyl(H))	ETciD	0.654198	1	0	1	1	Heavy	6.58795	0	21.4146	4	753.139	3009.53	-0.228594	73.1704
tctGTLGIILQDVNDNSPFIPk	Desmocollin-2 OS=Homo sapiens GN=DSC2 PE=1 SV=1 - [DSC2_HUMAN]	Q02487	T1(Hex); N-Term(Diethyl(H)); C2(Carbamidomethyl); T3(Hex); K22(Diethyl(H))	ETciD	1.06394	1	0	1	1	Heavy	5.05782	0	33.1774	4	712.626	2847.48	0.390046	73.2588
tctGtLGIILQDVNDNSPFIPk	Desmocollin-2 OS=Homo sapiens GN=DSC2 PE=1 SV=1 - [DSC2_HUMAN]	Q02487	T1(Hex); N-Term(Diethyl(H)); C2(Carbamidomethyl); T3(Hex); T5(Hex); K22(Diethyl(H))	ETciD	0.739931	1	0	1	1	Heavy	4.87056	0	12.7235	3	1003.85	3009.53	-0.447213	77.7169
tctGtLGIILQDVNDNSPFIPk	Desmocollin-2 OS=Homo sapiens GN=DSC2 PE=1 SV=1 - [DSC2_HUMAN]	Q02487	T1(Hex); N-Term(Diethyl(H)); C2(Carbamidomethyl); T3(Hex); T5(Hex); K22(Diethyl(H))	ETciD	0.566729	1	0	1	1	Heavy	5.19871	0	30.4432	4	753.139	3009.53	-0.0663492	77.805
tctGtLGIILQDVNDNSPFIPk	Desmocollin-2 OS=Homo sapiens GN=DSC2 PE=1 SV=1 - [DSC2_HUMAN]	Q02487	T1(Hex); N-Term(Diethyl(H)); C2(Carbamidomethyl); T3(Hex); T5(Hex); K22(Diethyl(H))	ETciD	0.708661	1	0	1	1	Heavy	3.99234	0	8.52414	3	1003.85	3009.53	-0.02132	82.4504
tctGtLGIILQD	Desmocollin-2 OS=Homo sapiens GN=DSC2 PE=1 SV=1 - [DSC2_HUMAN]	Q02487	T1(Hex); N-Term(Diethyl(H)); C2(Carbamidomethyl); T3(Hex); T5(Hex)	ETciD	3.19101	1	0	1	1	Heavy	1.81316	0	9.49901	2	919.45	1837.89	0.673637	52.3941
tctGtLGIILQDVNDNSPFIPkk	Desmocollin-2 OS=Homo sapiens GN=DSC2 PE=1 SV=1 - [DSC2_HUMAN]	Q02487	T1(Hex); N-Term(Diethyl); C2(Carbamidomethyl); T3(Hex); T5(Hex); K22(Diethyl); K23(Diethyl)	HCD	0.487364	1	0	1	1	Light	4.45862	1	53.4814	3	1062.56	3185.67	1.15087	68.4005
tctGtLGIILQDVNDNSPFIPkk	Desmocollin-2 OS=Homo sapiens GN=DSC2 PE=1 SV=1 - [DSC2_HUMAN]	Q02487	T1(Hex); N-Term(Diethyl); C2(Carbamidomethyl); T3(Hex); T5(Hex); K22(Diethyl); K23(Diethyl)	HCD	0.490272	1	0	1	1	Light	4.63523	1	17.9837	4	797.172	3185.67	0.744303	68.4479
tctGtLGIILQDVNDNSPFIPk	Desmocollin-2 OS=Homo sapiens GN=DSC2 PE=1 SV=1 - [DSC2_HUMAN]	Q02487	T1(Hex); N-Term(Diethyl); C2(Carbamidomethyl); T3(Hex); T5(Hex); K22(Diethyl)	HCD	0.659419	1	0	1	1	Light	4.2283	0	3.05122	3	1001.17	3001.51	0.420836	68.5742
tctGtLGIILQDVNDNSPFIPk	Desmocollin-2 OS=Homo sapiens GN=DSC2 PE=1 SV=1 - [DSC2_HUMAN]	Q02487	T1(Hex); N-Term(Diethyl); C2(Carbamidomethyl); T3(Hex); T5(Hex); K22(Diethyl)	HCD	0.711399	1	0	1	1	Light	4.24706	0	6.59528	3	1001.17	3001.51	0.359831	73.0488
tctGtLGIILQDVNDNSPFIPk	Desmocollin-2 OS=Homo sapiens GN=DSC2 PE=1 SV=1 - [DSC2_HUMAN]	Q02487	T1(Hex); N-Term(Diethyl); C2(Carbamidomethyl); T3(Hex); T5(Hex); K22(Diethyl)	HCD	0.678228	1	0	1	1	Light	3.40844	0	0	2	1501.26	3001.51	0.384646	73.098
tctGtLGIILQDVNDNSPFIPk	Desmocollin-2 OS=Homo sapiens GN=DSC2 PE=1 SV=1 - [DSC2_HUMAN]	Q02487	T1(Hex); N-Term(Diethyl); C2(Carbamidomethyl); T3(Hex); T5(Hex); K22(Diethyl)	HCD	0.654198	1	0	1	1	Light	4.34885	0	4.16615	4	751.132	3001.51	0.253677	73.1072
tctGtLGIILQDVNDNSPFIPk	Desmocollin-2 OS=Homo sapiens GN=DSC2 PE=1 SV=1 - [DSC2_HUMAN]	Q02487	N-Term(Diethyl); C2(Carbamidomethyl); T3(Hex); T5(Hex); K22(Diethyl)	HCD	0.668976	1	0	1	1	Light	4.93068	0	21.7037	3	947.156	2839.45	-0.168444	73.2366
tctGtLGIILQDVNDNSPFIPk	Desmocollin-2 OS=Homo sapiens GN=DSC2 PE=1 SV=1 - [DSC2_HUMAN]	Q02487	T1(Hex); N-Term(Diethyl); C2(Carbamidomethyl); T3(Hex); T5(Hex); K22(Diethyl)	HCD	0.739931	1	0	1	1	Light	4.24941	0	0	3	1001.17	3001.51	0.48184	77.7721
tctGtLGIILQDVNDNSPFIPk	Desmocollin-2 OS=Homo sapiens GN=DSC2 PE=1 SV=1 - [DSC2_HUMAN]	Q02487	T1(Hex); N-Term(Diethyl); C2(Carbamidomethyl); T3(Hex); T5(Hex); K22(Diethyl)	HCD	0.720192	1	0	1	1	Light	3.30676	0	0	2	1501.26	3001.51	0.303307	78.1217
tctGtLGIILQDVNDNSPFIPk	Desmocollin-2 OS=Homo sapiens GN=DSC2 PE=1 SV=1 - [DSC2_HUMAN]	Q02487	T1(Hex); N-Term(Diethyl); C2(Carbamidomethyl); T3(Hex); T5(Hex); K22(Diethyl)	HCD	0.708661	1	0	1	1	Light	3.92038	0	0	3	1001.17	3001.51	-0.372223	82.4943
tctGtLGIILQDVNDNSPFIPk	Desmocollin-2 OS=Homo sapiens GN=DSC2 PE=1 SV=1 - [DSC2_HUMAN]	Q02487	T1(Hex); N-Term(Diethyl); C2(Carbamidomethyl); T3(Hex); T5(Hex); K22(Diethyl)	HCD	0.681227	1	0	1	1	Light	3.28453	0	0	2	1501.26	3001.51	0.791342	82.5766
tctGtLGIILQDVNDNSPFIPk	Desmocollin-2 OS=Homo sapiens GN=DSC2 PE=1 SV=1 - [DSC2_HUMAN]	Q02487	T1(Hex); N-Term(Diethyl); C2(Carbamidomethyl); T3(Hex); T5(Hex); K22(Diethyl)	HCD	0.591776	1	0	1	1	Light	3.63969	0	0	3	1001.17	3001.51	0.298827	82.8715
tctGtLGIILQDVNDNSPFIPk	Desmocollin-2 OS=Homo sapiens GN=DSC2 PE=1 SV=1 - [DSC2_HUMAN]	Q02487	T1(Hex); N-Term(Diethyl); C2(Carbamidomethyl); T3(Hex); T5(Hex); K22(Diethyl)	HCD	0.716818	1	0	1	1	Light	4.1944	0	0	3	1001.17	3001.51	0.298827	68.3674
tctGtLGIILQDVNDNSPFIPk	Desmocollin-2 OS=Homo sapiens GN=DSC2 PE=1 SV=1 - [DSC2_HUMAN]	Q02487	T1(Hex); N-Term(Diethyl); C2(Carbamidomethyl); T3(Hex); T5(Hex); K22(Diethyl)	HCD	0.622791	1	0	1	1	Light	2.64913	0	16.008	2	1501.26	3001.51	-0.266069	68.4318
tctGtLGIILQDVNDNSPFIPkk	Desmocollin-2 OS=Homo sapiens GN=DSC2 PE=1 SV=1 - [DSC2_HUMAN]	Q02487	T1(Hex); N-Term(Diethyl); C2(Carbamidomethyl); T3(Hex); T5(Hex); K22(Diethyl); K23(Diethyl)	HCD	0.50803	1	0	1	1	Light	2.53854	1	3.36881	3	1062.56	3185.67	1.03591	68.519
tctGtLGIILQDVNDNSPFIPk	Desmocollin-2 OS=Homo sapiens GN=DSC2 PE=1 SV=1 - [DSC2_HUMAN]	Q02487	T1(Hex); N-Term(Diethyl); C2(Carbamidomethyl); T3(Hex); T5(Hex); K22(Diethyl)	HCD	0.716434	1	0	1	1	Light	4.56246	0	13.9739	3	1001.17	3001.5	-0.433228	72.8366
tctGtLGIILQDVNDNSPFIPk	Desmocollin-2 OS=Homo sapiens GN=DSC2 PE=1 SV=1 - [DSC2_HUMAN]	Q02487	T1(Hex); N-Term(Diethyl); C2(Carbamidomethyl); T3(Hex); T5(Hex); K22(Diethyl)	HCD	0.708065	1	0	1	1	Light	3.30933	0	0	2	1501.26	3001.5	-0.754106	72.8428
tctGtLGIILQDVNDNSPFIPk	Desmocollin-2 OS=Homo sapiens GN=DSC2 PE=1 SV=1 - [DSC2_HUMAN]	Q02487	T1(Hex); N-Term(Diethyl); C2(Carbamidomethyl); T3(Hex); T5(Hex); K22(Diethyl)	HCD	0.716193	1	0	1	1	Light	3.72126	0	6.68459	4	751.132	3001.51	0.416356	72.9056
tctGtLGIILQDVNDNSPFIPk	Desmocollin-2 OS=Homo sapiens GN=DSC2 PE=1 SV=1 - [DSC2_HUMAN]	Q02487	N-Term(Diethyl); C2(Carbamidomethyl); T3(Hex); T5(Hex); K22(Diethyl)	HCD	0.567287	1	0	1	1	Light	5.84848	0	51.1294	3	947.155	2839.45	-1.20022	72.9769
tctGTLGIILQDVNDNsPFIPk	Desmocollin-2 OS=Homo sapiens GN=DSC2 PE=1 SV=1 - [DSC2_HUMAN]	Q02487	T1(Hex); N-Term(Diethyl); C2(Carbamidomethyl); T3(Hex); S17(Hex); K22(Diethyl)	HCD	0.599189	1	0	1	1	Light	2.43268	0	6.03408	3	1001.18	3001.51	2.00695	75.1056
tctGtLGIILQDVNDNSPFIPk	Desmocollin-2 OS=Homo sapiens GN=DSC2 PE=1 SV=1 - [DSC2_HUMAN]	Q02487	N-Term(Diethyl); C2(Carbamidomethyl); T3(Hex); T5(Hex); K22(Diethyl)	HCD	0.526637	1	0	1	1	Light	2.45693	0	15.9661	2	1420.23	2839.46	3.27554	81.7615
tctGtLGIILQDVNDNSPFIPkk	Desmocollin-2 OS=Homo sapiens GN=DSC2 PE=1 SV=1 - [DSC2_HUMAN]	Q02487	T1(Hex); N-Term(Diethyl); C2(Carbamidomethyl); T3(Hex); T5(Hex); K22(Diethyl); K23(Diethyl)	HCD	0.00104232	1	0	1	1	Light	2.54046	1	0	4	797.172	3185.67	1.05085	76.7225
tctGtLGIILQDVNDNSPFIPk	Desmocollin-2 OS=Homo sapiens GN=DSC2 PE=1 SV=1 - [DSC2_HUMAN]	Q02487	T1(Hex); N-Term(Diethyl); C2(Carbamidomethyl); T3(Hex); T5(Hex); K22(Diethyl)	HCD	0.734977	1	0	1	1	Light	2.84852	0	1.77548	2	1501.26	3001.5	-0.510087	78.641
tctGtLGIILQDVNDNSPFIPk	Desmocollin-2 OS=Homo sapiens GN=DSC2 PE=1 SV=1 - [DSC2_HUMAN]	Q02487	N-Term(Diethyl(H)); C2(Carbamidomethyl); T3(Hex); T5(Hex); K22(Diethyl(H))	HCD	1.06394	1	0	1	1	Heavy	4.19052	0	33.1774	4	712.626	2847.48	0.390046	73.2699
tctGtLGIILQDVNDNSPFIPk	Desmocollin-2 OS=Homo sapiens GN=DSC2 PE=1 SV=1 - [DSC2_HUMAN]	Q02487	T1(Hex); N-Term(Diethyl(H)); C2(Carbamidomethyl); T3(Hex); T5(Hex); K22(Diethyl(H))	HCD	0.566729	1	0	1	1	Heavy	3.16556	0	30.4432	4	753.139	3009.53	-0.0663492	77.8129
sAMSTAtVtVNVEDQDEGPEcNPPIQTVR	Desmocollin-2 OS=Homo sapiens GN=DSC2 PE=1 SV=1 - [DSC2_HUMAN]	Q02487	N-Term(Diethyl(H)); T7(Hex); T9(Hex); C21(Carbamidomethyl)	HCD	5.37486	1	0	1	1	Heavy	4.20456	0	38.1021	3	1177.21	3529.63	1.13185	47.9053
tctGtLGIILQDVNDNSPFIPkk	Desmocollin-2 OS=Homo sapiens GN=DSC2 PE=1 SV=1 - [DSC2_HUMAN]	Q02487	T1(Hex); N-Term(Diethyl(H)); C2(Carbamidomethyl); T3(Hex); T5(Hex); K22(Diethyl(H)); K23(Diethyl(H))	HCD	0.492138	1	0	1	1	Heavy	4.09192	1	64.0561	4	800.182	3197.71	0.59606	68.2595
tctGtLGIILQDVNDNSPFIPk	Desmocollin-2 OS=Homo sapiens GN=DSC2 PE=1 SV=1 - [DSC2_HUMAN]	Q02487	N-Term(Diethyl(H)); C2(Carbamidomethyl); T3(Hex); T5(Hex); K22(Diethyl(H))	HCD	0.595951	1	0	1	1	Heavy	4.73229	0	39.4882	4	712.625	2847.48	-0.03865	72.9109
tctGtLGIILQDVNDNSPFIPk	Desmocollin-2 OS=Homo sapiens GN=DSC2 PE=1 SV=1 - [DSC2_HUMAN]	Q02487	N-Term(Diethyl(H)); C2(Carbamidomethyl); T3(Hex); T5(Hex); K22(Diethyl(H))	HCD	0.51595	1	0	1	1	Heavy	4.21521	0	15.4802	3	949.832	2847.48	0.330464	81.7571
yGPmAGGTLLtLTGNYLNSGNSR	Hepatocyte growth factor receptor OS=Homo sapiens GN=MET PE=1 SV=4 - [MET_HUMAN]	P08581	N-Term(Diethyl(H)); M4(Oxidation); T11(Hex)	ETciD	1332.95	1	0	1	1	Heavy	5.1522	0	13.6145	3	865.765	2595.28	0.964109	65.7923
yGPMAGGTLLtLTGNYLNSGNSR	Hepatocyte growth factor receptor OS=Homo sapiens GN=MET PE=1 SV=4 - [MET_HUMAN]	P08581	N-Term(Diethyl(H)); T11(Hex)	ETciD	879.051	1	0	1	1	Heavy	4.15226	0	2.30777	3	860.433	2579.29	0.513081	71.3087
yGPmAGGTLLTLtGNYLNSGNSR	Hepatocyte growth factor receptor OS=Homo sapiens GN=MET PE=1 SV=4 - [MET_HUMAN]	P08581	N-Term(Diethyl(H)); M4(Oxidation); T13(Hex)	HCD	8896.68	1	0	1	1	Heavy	4.94861	0	0	2	1298.14	2595.28	0.96929	65.798
yGPmAGGTLLtLTGNYLNSGNSR	Hepatocyte growth factor receptor OS=Homo sapiens GN=MET PE=1 SV=4 - [MET_HUMAN]	P08581	N-Term(Diethyl(H)); M4(Oxidation); T11(Hex)	HCD	9953.14	1	0	1	1	Heavy	5.02508	0	13.6145	3	865.765	2595.28	0.964109	65.8059
yGPMAGGTLLTLtGNYLNSGNSR	Hepatocyte growth factor receptor OS=Homo sapiens GN=MET PE=1 SV=4 - [MET_HUMAN]	P08581	N-Term(Diethyl(H)); T13(Hex)	HCD	6563.9	1	0	1	1	Heavy	4.91208	0	2.30777	3	860.433	2579.29	0.513081	71.3211
yGPMAGGTLLTLtGNYLNSGNSR	Hepatocyte growth factor receptor OS=Homo sapiens GN=MET PE=1 SV=4 - [MET_HUMAN]	P08581	N-Term(Diethyl(H)); T13(Hex)	HCD	3937.24	1	0	1	1	Heavy	3.48755	0	54.533	2	1290.15	2579.29	0.896912	71.3532
sFISGGstITGVGk	Hepatocyte growth factor receptor OS=Homo sapiens GN=MET PE=1 SV=4 - [MET_HUMAN]	P08581	N-Term(Diethyl(H)); S7(Hex); T8(Hex); K14(Diethyl(H))	HCD	3589.64	1	0	1	1	Heavy	2.61204	0	28.2022	2	877.981	1754.95	0.554801	42.6994
yGPmAGGTLLtLTGNYLNSGNSR	Hepatocyte growth factor receptor OS=Homo sapiens GN=MET PE=1 SV=4 - [MET_HUMAN]	P08581	N-Term(Diethyl(H)); M4(Oxidation); T11(Hex)	HCD	13563	1	0	1	1	Heavy	3.32722	0	8.77584	2	1298.14	2595.28	0.593006	65.5345
yGPmAGGTLLTLtGNYLNSGNSR	Hepatocyte growth factor receptor OS=Homo sapiens GN=MET PE=1 SV=4 - [MET_HUMAN]	P08581	N-Term(Diethyl(H)); M4(Oxidation); T13(Hex)	HCD	18758	1	0	1	1	Heavy	4.86249	0	3.83453	3	865.764	2595.28	-0.72917	65.5532
yGPMAGGTLLTLtGNYLNSGNSR	Hepatocyte growth factor receptor OS=Homo sapiens GN=MET PE=1 SV=4 - [MET_HUMAN]	P08581	N-Term(Diethyl(H)); T13(Hex)	HCD	5143.49	1	0	1	1	Heavy	2.47313	0	0	2	1290.15	2579.28	0.139677	71.0559
yGPMAGGTLLTLtGNYLNSGNSR	Hepatocyte growth factor receptor OS=Homo sapiens GN=MET PE=1 SV=4 - [MET_HUMAN]	P08581	N-Term(Diethyl(H)); T13(Hex)	HCD	8812.49	1	0	1	1	Heavy	4.60579	0	15.8985	3	860.434	2579.29	0.797044	71.0869
yGPmAGGTLLTLtGNYLNSGNSR	Hepatocyte growth factor receptor OS=Homo sapiens GN=MET PE=1 SV=4 - [MET_HUMAN]	P08581	N-Term(Diethyl(H)); M4(Oxidation); T13(Hex)	HCD	652.942	1	0	1	1	Heavy	4.35315	0	58.1519	3	865.764	2595.28	-0.658616	71.5574
sGNFGGsR	Heterogeneous nuclear ribonucleoproteins A2/B1 OS=Homo sapiens GN=HNRNPA2B1 PE=1 SV=2 - [ROA2_HUMAN]	P22626	N-Term(Diethyl(H)); S7(Hex)	ETciD	4.8291	1	0	1	1	Heavy	1.53952	0	28.3155	2	502.248	1003.49	0.336165	15.681
gGNFGFGDsR	Heterogeneous nuclear ribonucleoproteins A2/B1 OS=Homo sapiens GN=HNRNPA2B1 PE=1 SV=2 - [ROA2_HUMAN]	P22626	N-Term(Diethyl(H)); S9(Hex)	HCD	2046.19	1	0	1	1	Heavy	2.24997	0	44.1169	2	618.29	1235.57	-0.197598	34.5721
fGSTADALVSDDEtTR	Melanoma inhibitory activity protein 3 OS=Homo sapiens GN=MIA3 PE=1 SV=1 - [MIA3_HUMAN]	Q5JRA6	N-Term(Diethyl(H)); T14(Hex)	HCD	3.13366	1	0	1	1	Heavy	3.15554	0	7.92309	2	953.952	1906.9	0.496263	41.9099
iDPEWSINSGGTLLtVTGTNLATVR	Plexin-A1 OS=Homo sapiens GN=PLXNA1 PE=1 SV=3 - [PLXA1_HUMAN]	Q9UIW2	N-Term(Diethyl(H)); T15(Hex)	HCD	474.148	1	0	1	1	Heavy	5.17966	0	7.56634	3	946.506	2837.5	2.56281	74.3099
iDPEWSINSGGtLLTVTGTNLATVR	Plexin-A1 OS=Homo sapiens GN=PLXNA1 PE=1 SV=3 - [PLXA1_HUMAN]	Q9UIW2	N-Term(Diethyl(H)); T12(Hex)	HCD	387.357	1	0	1	1	Heavy	2.17726	0	0	2	1419.25	2837.5	0.0508653	74.3284
iQPETGPLGGGIRItILGSNLGVQAGDIQR	Plexin-B2 OS=Homo sapiens GN=PLXNB2 PE=1 SV=3 - [PLXB2_HUMAN]	O15031	N-Term(Diethyl(H)); T15(Hex)	ETciD	3548.58	1	0	1	1	Heavy	5.28174	1	0	3	1084.94	3252.8	-0.834917	77.8405
iQPETGPLGGGIRItILGSNLGVQAGDIQR	Plexin-B2 OS=Homo sapiens GN=PLXNB2 PE=1 SV=3 - [PLXB2_HUMAN]	O15031	N-Term(Diethyl(H)); T15(Hex)	ETciD	3152.42	1	0	1	1	Heavy	6.26102	1	12.6638	3	1084.94	3252.8	-0.497167	83.6455
iQPETGPLGGGIRItILGSNLGVQAGDIQR	Plexin-B2 OS=Homo sapiens GN=PLXNB2 PE=1 SV=3 - [PLXB2_HUMAN]	O15031	N-Term(Diethyl(H)); T15(Hex)	ETciD	556.501	1	0	1	1	Heavy	6.00494	1	0	4	813.956	3252.8	0.75588	83.8622
iQPETGPLGGGIRItILGSNLGVQAGDIQR	Plexin-B2 OS=Homo sapiens GN=PLXNB2 PE=1 SV=3 - [PLXB2_HUMAN]	O15031	N-Term(Diethyl(H)); T15(Hex)	ETciD	2723.16	1	0	1	1	Heavy	5.38246	1	0	3	1084.94	3252.8	-0.947501	84.313
iQPETGPLGGGIRItILGSNLGVQAGDIQR	Plexin-B2 OS=Homo sapiens GN=PLXNB2 PE=1 SV=3 - [PLXB2_HUMAN]	O15031	N-Term(Diethyl(H)); T15(Hex)	HCD	26497.4	1	0	1	1	Heavy	3.46633	1	0	3	1084.94	3252.8	-0.834917	77.8527
iQPETGPLGGGIRItILGSNLGVQAGDIQR	Plexin-B2 OS=Homo sapiens GN=PLXNB2 PE=1 SV=3 - [PLXB2_HUMAN]	O15031	N-Term(Diethyl(H)); T15(Hex)	HCD	23539.2	1	0	1	1	Heavy	2.92106	1	0	3	1084.94	3252.8	-0.272	83.7373
iQPETGPLGGGIRITILGsNLGVQAGDIQR	Plexin-B2 OS=Homo sapiens GN=PLXNB2 PE=1 SV=3 - [PLXB2_HUMAN]	O15031	N-Term(Diethyl(H)); S19(Hex)	HCD	4155.41	1	0	1	1	Heavy	5.44096	1	26.9307	4	813.956	3252.8	1.0561	83.7393
iQPETGPLGGGIRItILGSNLGVQAGDIQR	Plexin-B2 OS=Homo sapiens GN=PLXNB2 PE=1 SV=3 - [PLXB2_HUMAN]	O15031	N-Term(Diethyl(H)); T15(Hex)	HCD	20333.9	1	0	1	1	Heavy	3.70097	1	0	3	1084.94	3252.8	-0.947501	84.3249
iQPETGPLGGGIRITILGsNLGVQAGDIQR	Plexin-B2 OS=Homo sapiens GN=PLXNB2 PE=1 SV=3 - [PLXB2_HUMAN]	O15031	N-Term(Diethyl(H)); S19(Hex)	HCD	181.246	1	0	1	1	Heavy	2.9661	1		4	813.955	3252.8	0.155436	70.6011
itILGSNLGVQAGDIQR	Plexin-B2 OS=Homo sapiens GN=PLXNB2 PE=1 SV=3 - [PLXB2_HUMAN]	O15031	N-Term(Diethyl(H)); T2(Hex)	HCD	2044.65	1	0	1	1	Heavy	3.25798	0	15.0666	2	989.055	1977.1	-0.591778	60.4114
aIEPLSGPLDGGTLLtIR	Plexin-D1 OS=Homo sapiens GN=PLXND1 PE=1 SV=3 - [PLXD1_HUMAN]	Q9Y4D7	N-Term(Diethyl(H)); T16(Hex)	HCD	4716.26	1	0	1	1	Heavy	3.28203	0	51.0472	2	1023.08	2045.16	0.209524	72.2319
yGVsGYPTLk	Protein disulfide-isomerase A3 OS=Homo sapiens GN=PDIA3 PE=1 SV=4 - [PDIA3_HUMAN]	P30101	N-Term(Diethyl(H)); S4(Hex); K10(Diethyl(H))	ETciD	1.14031	1	0	1	1	Heavy	2.31404	0	5.24536	2	683.89	1366.77	-0.0607085	44.5758
yGVsGYPTLk	Protein disulfide-isomerase A3 OS=Homo sapiens GN=PDIA3 PE=1 SV=4 - [PDIA3_HUMAN]	P30101	N-Term(Diethyl(H)); S4(Hex); K10(Diethyl(H))	ETciD	1.34759	1	0	1	1	Heavy	1.87083	0	30.8899	2	683.89	1366.77	0.743107	50.6314
fFPASADRtVIDYNGER	Protein disulfide-isomerase OS=Homo sapiens GN=P4HB PE=1 SV=3 - [PDIA1_HUMAN]	P07237	N-Term(Diethyl(H)); T9(Hex)	ETciD	3.99954	1	0	1	1	Heavy	5.7359	1	23.2539	3	727.361	2180.07	0.276154	44.5062
vSAtDADIGtNGEFYYSFk	Protocadherin Fat 1 OS=Homo sapiens GN=FAT1 PE=1 SV=2 - [FAT1_HUMAN]	Q14517	N-Term(Diethyl); T4(Hex); T10(Hex); K19(Diethyl)	ETciD	0.182738	1	0	1	1	Light	4.16779	0	15.5332	3	841.063	2521.17	-0.349637	60.0331
yVtAVDRDSGR	Protocadherin Fat 1 OS=Homo sapiens GN=FAT1 PE=1 SV=2 - [FAT1_HUMAN]	Q14517	N-Term(Diethyl(H)); T3(Hex)	ETciD	1.7855	1	0	1	1	Heavy	2.88214	1	39.4138	3	487.585	1460.74	-0.0275272	19.7792
vSAtDADIGtNGEFYYSFk	Protocadherin Fat 1 OS=Homo sapiens GN=FAT1 PE=1 SV=2 - [FAT1_HUMAN]	Q14517	N-Term(Diethyl); T4(Hex); T10(Hex); K19(Diethyl)	HCD	0.174186	1	0	1	1	Light	2.91698	0	3.11825	2	1261.09	2521.18	-0.126422	60.0389
vSAtDADIGtNGEFYYSFk	Protocadherin Fat 1 OS=Homo sapiens GN=FAT1 PE=1 SV=2 - [FAT1_HUMAN]	Q14517	N-Term(Diethyl); T4(Hex); T10(Hex); K19(Diethyl)	HCD	0.182738	1	0	1	1	Light	4.29386	0	15.5332	3	841.063	2521.17	-0.349637	60.0466
vSAtDADIGTNGEFYYSFk	Protocadherin Fat 1 OS=Homo sapiens GN=FAT1 PE=1 SV=2 - [FAT1_HUMAN]	Q14517	N-Term(Diethyl); T4(Hex); K19(Diethyl)	HCD	0.210167	1	0	1	1	Light	3.25102	0	10.6311	2	1180.07	2359.12	0.316836	61.9065
vSAtDADIGtNGEFYYSFk	Protocadherin Fat 1 OS=Homo sapiens GN=FAT1 PE=1 SV=2 - [FAT1_HUMAN]	Q14517	N-Term(Diethyl); T4(Hex); T10(Hex); K19(Diethyl)	HCD	0.176903	1	0	1	1	Light	2.62489	0	5.20955	2	1261.09	2521.18	0.55143	59.8833
vSAtDADIGtNGEFYYSFk	Protocadherin Fat 1 OS=Homo sapiens GN=FAT1 PE=1 SV=2 - [FAT1_HUMAN]	Q14517	N-Term(Diethyl); T4(Hex); T10(Hex); K19(Diethyl)	HCD	0.174746	1	0	1	1	Light	4.23887	0	49.0868	3	841.063	2521.17	-0.640145	59.8982
vSATDADIGtNGEFYYSFk	Protocadherin Fat 1 OS=Homo sapiens GN=FAT1 PE=1 SV=2 - [FAT1_HUMAN]	Q14517	N-Term(Diethyl); T10(Hex); K19(Diethyl)	HCD	0.235035	1	0	1	1	Light	2.97986	0	12.9114	2	1180.07	2359.12	0.10986	61.6763
iGtSVLQVtAR	Protocadherin Fat 3 OS=Homo sapiens GN=FAT3 PE=2 SV=2 - [FAT3_HUMAN]	Q8TDW7	N-Term(Diethyl(H)); T3(Hex); T9(Hex)	ETciD	0.893735	1	0	1	1	Heavy	1.91983	0	19.2284	2	764.929	1528.85	0.064117	38.4258
qVILDtATDSDIGsNGVDHR	Protocadherin Fat 4 OS=Homo sapiens GN=FAT4 PE=1 SV=2 - [FAT4_HUMAN]	Q6V0I7	N-Term(Diethyl(H)); T6(Hex); S14(Hex)	ETciD	4.46346	1	0	1	1	Heavy	2.79015	0	16.3634	3	833.071	2497.2	0.701399	38.5087
qVILDtAtDSDIGSNGVDHR	Protocadherin Fat 4 OS=Homo sapiens GN=FAT4 PE=1 SV=2 - [FAT4_HUMAN]	Q6V0I7	N-Term(Diethyl(H)); T6(Hex); T8(Hex)	HCD	4.46346	1	0	1	1	Heavy	4.60593	0	16.3634	3	833.071	2497.2	0.701399	38.5173
qVILDtAtDSDIGSNGVDHR	Protocadherin Fat 4 OS=Homo sapiens GN=FAT4 PE=1 SV=2 - [FAT4_HUMAN]	Q6V0I7	N-Term(Diethyl(H)); T6(Hex); T8(Hex)	HCD	3.37286	1	0	1	1	Heavy	3.98428	0	24.7956	3	833.072	2497.2	1.50797	38.3372
gAsIFsVTALDPDSk	Protocadherin gamma-A11 OS=Homo sapiens GN=PCDHGA11 PE=1 SV=1 - [PCDGB_HUMAN]	Q9Y5H2	N-Term(Diethyl); S3(Hex); S6(Hex); K15(Diethyl)	HCD	0.514577	1	0	1	1	Light	1.99313	0	0	2	972.501	1944	0.444326	59.7302
tGtALLTIR	Protocadherin-10 OS=Homo sapiens GN=PCDH10 PE=2 SV=2 - [PCD10_HUMAN]	Q9P2E7	N-Term(Diethyl); T1(Hex); T3(Hex)	ETciD	2.44978	1	0	1	1	Light	1.90489	0	0.181202	2	663.375	1325.74	0.526134	38.9593
tGtALLTIR	Protocadherin-10 OS=Homo sapiens GN=PCDH10 PE=2 SV=2 - [PCD10_HUMAN]	Q9P2E7	N-Term(Diethyl); T1(Hex); T3(Hex)	ETciD	2.6108	1	0	1	1	Light	2.04324	0	8.95051	2	663.374	1325.74	0.249903	45.7751
aELGQQtGtAtVR	Protocadherin-16 OS=Homo sapiens GN=DCHS1 PE=2 SV=1 - [PCD16_HUMAN]	Q96JQ0	N-Term(Diethyl); T7(Hex); T9(Hex); T11(Hex)	HCD	1.2099	1	0	1	1	Light	2.03548	0	1.08509	2	937.46	1873.91	0.531747	21.5719
aELGQQtGtAtVR	Protocadherin-16 OS=Homo sapiens GN=DCHS1 PE=2 SV=1 - [PCD16_HUMAN]	Q96JQ0	N-Term(Diethyl); T7(Hex); T9(Hex); T11(Hex)	HCD	1.35215	1	0	1	1	Light	1.90244	0	0.681194	2	937.461	1873.91	0.66203	21.482
sAtAtVsLFVMDENDNAPTVTLPk	Protocadherin-7 OS=Homo sapiens GN=PCDH7 PE=1 SV=2 - [PCDH7_HUMAN]	O60245	N-Term(Diethyl(H)); S1(Hex); T3(Hex); T5(Hex); S7(Hex); K24(Diethyl(H))	HCD	0.622941	1	0	1	1	Heavy	3.77996	0	7.08087	3	1097.21	3289.62	1.97116	64.3551
yStVGVItVTDADAGENk	Protocadherin-9 OS=Homo sapiens GN=PCDH9 PE=1 SV=2 - [PCDH9_HUMAN]	Q9HC56	N-Term(Diethyl); T3(Hex); T8(Hex); K18(Diethyl)	ETciD	0.675776	1	0	1	1	Light	5.36846	0	0	3	759.381	2276.13	-0.0648164	43.639
yStVGVITVTDADAGENk	Protocadherin-9 OS=Homo sapiens GN=PCDH9 PE=1 SV=2 - [PCDH9_HUMAN]	Q9HC56	N-Term(Diethyl); T3(Hex); K18(Diethyl)	ETciD	0.669321	1	0	1	1	Light	4.66109	0	43.981	3	705.363	2114.08	0.232447	43.6716
yStVGVItVTDADAGENk	Protocadherin-9 OS=Homo sapiens GN=PCDH9 PE=1 SV=2 - [PCDH9_HUMAN]	Q9HC56	N-Term(Diethyl); T3(Hex); T8(Hex); K18(Diethyl)	ETciD	0.603808	1	0	1	1	Light	1.93659	0	10.0024	2	1138.57	2276.13	0.316506	47.2366
yStVGVItVTDADAGENk	Protocadherin-9 OS=Homo sapiens GN=PCDH9 PE=1 SV=2 - [PCDH9_HUMAN]	Q9HC56	N-Term(Diethyl); T3(Hex); T8(Hex); K18(Diethyl)	ETciD	0.729074	1	0	1	1	Light	3.8274	0	32.7844	3	759.381	2276.13	0.337414	47.2425
ySTVGVItVtDADAGENk	Protocadherin-9 OS=Homo sapiens GN=PCDH9 PE=1 SV=2 - [PCDH9_HUMAN]	Q9HC56	N-Term(Diethyl); T8(Hex); T10(Hex); K18(Diethyl)	HCD	0.661699	1	0	1	1	Light	2.9634	0	52.2332	2	1138.57	2276.13	-0.219801	43.6586
ySTVGVItVTDADAGENk	Protocadherin-9 OS=Homo sapiens GN=PCDH9 PE=1 SV=2 - [PCDH9_HUMAN]	Q9HC56	N-Term(Diethyl); T8(Hex); K18(Diethyl)	HCD	0.669321	1	0	1	1	Light	4.91082	0	43.981	3	705.363	2114.08	0.232447	43.685
ystVGVITVTDADAGENk	Protocadherin-9 OS=Homo sapiens GN=PCDH9 PE=1 SV=2 - [PCDH9_HUMAN]	Q9HC56	N-Term(Diethyl); S2(Hex); T3(Hex); K18(Diethyl)	HCD	0.603808	1	0	1	1	Light	2.91016	0	10.0024	2	1138.57	2276.13	0.316506	47.2484
ySTVGVItVtDADAGENk	Protocadherin-9 OS=Homo sapiens GN=PCDH9 PE=1 SV=2 - [PCDH9_HUMAN]	Q9HC56	N-Term(Diethyl); T8(Hex); T10(Hex); K18(Diethyl)	HCD	0.729074	1	0	1	1	Light	3.64394	0	32.7844	3	759.381	2276.13	0.337414	47.2511
ySTVGVItVtDADAGENk	Protocadherin-9 OS=Homo sapiens GN=PCDH9 PE=1 SV=2 - [PCDH9_HUMAN]	Q9HC56	N-Term(Diethyl); T8(Hex); T10(Hex); K18(Diethyl)	HCD	0.663372	1	0	1	1	Light	3.94867	0	17.8664	3	759.381	2276.13	0.0960756	43.4102
ySTVGVItVTDADAGENk	Protocadherin-9 OS=Homo sapiens GN=PCDH9 PE=1 SV=2 - [PCDH9_HUMAN]	Q9HC56	N-Term(Diethyl); T8(Hex); K18(Diethyl)	HCD	0.616341	1	0	1	1	Light	5.12698	0	42.1832	3	705.364	2114.08	0.578897	43.4752
ysTVGVITVTDADAGENk	Protocadherin-9 OS=Homo sapiens GN=PCDH9 PE=1 SV=2 - [PCDH9_HUMAN]	Q9HC56	N-Term(Diethyl); S2(Hex); K18(Diethyl)	HCD	0.642141	1	0	1	1	Light	3.17809	0	31.2677	2	1057.54	2114.08	0.383162	46.1137
ySTVGVItVtDADAGENk	Protocadherin-9 OS=Homo sapiens GN=PCDH9 PE=1 SV=2 - [PCDH9_HUMAN]	Q9HC56	N-Term(Diethyl); T8(Hex); T10(Hex); K18(Diethyl)	HCD	0.631054	1	0	1	1	Light	2.51326	0	27.5605	2	1138.57	2276.13	0.63829	47.7978
ySTVGVItVtDADAGENk	Protocadherin-9 OS=Homo sapiens GN=PCDH9 PE=1 SV=2 - [PCDH9_HUMAN]	Q9HC56	N-Term(Diethyl); T8(Hex); T10(Hex); K18(Diethyl)	HCD	0.534496	1	0	1	1	Light	3.24166	0	35.8673	3	759.382	2276.13	0.900535	47.8053
ySTVGVItVtDADAGENk	Protocadherin-9 OS=Homo sapiens GN=PCDH9 PE=1 SV=2 - [PCDH9_HUMAN]	Q9HC56	N-Term(Diethyl(H)); T8(Hex); T10(Hex); K18(Diethyl(H))	HCD	0.675776	1	0	1	1	Heavy	4.34418	0	6.62532	3	762.057	2284.16	0.0757891	43.667
yStVGVItVTDADAGENk	Protocadherin-9 OS=Homo sapiens GN=PCDH9 PE=1 SV=2 - [PCDH9_HUMAN]	Q9HC56	N-Term(Diethyl(H)); T3(Hex); T8(Hex); K18(Diethyl(H))	HCD	0.661286	1	0	1	1	Heavy	2.63287	0	7.85805	2	1142.58	2284.16	0.642819	43.4129
sAFRtsEGIVPtPGR	UPF0606 protein KIAA1549 OS=Homo sapiens GN=KIAA1549 PE=1 SV=4 - [K1549_HUMAN]	Q9HCM3	N-Term(Diethyl(H)); S1(Hex); T5(Hex); S6(Hex); T12(Hex)	ETciD	7.67994	1	0	1	1	Heavy	4.34461	1	11.9078	3	761.71	2283.12	0.379791	32.0342

## Sheet: Exp7
Sequence	Protein Descriptions	Protein Group Accessions	Modifications	Activation Type	Ratio (Heavy/Light)	ΔScore	ΔCn	Rank	Search Engine Rank	Quan Channel	XCorr	Amanda Score	E-Value	P-Value	# Missed Cleavages	Isolation Interference [%]	Charge	m/z [Da]	MH+ [Da]	ΔM [ppm]	RT [min]
VTASDRDK	Cadherin EGF LAG seven-pass G-type receptor 2 OS=Homo sapiens GN=CELSR2 PE=2 SV=1 - [CELR2_HUMAN]	Q9HCU4	N-Term(Diethyl); T2(Hex); K8(Diethyl)	ETciD	0.537982	1	0	1	1	Light	2.40542				1	29.5914	3	389.215	1165.63	-0.0245937	18.7275
VTASDRDK	Cadherin EGF LAG seven-pass G-type receptor 2 OS=Homo sapiens GN=CELSR2 PE=2 SV=1 - [CELR2_HUMAN]	Q9HCU4	N-Term(Diethyl); T2(Hex); K8(Diethyl)	ETciD	0.548504	1	0	1	1	Light	1.86937				1	26.7607	3	389.215	1165.63	-0.181681	20.1781
LNEDAAVGTSVVTVSAVDR	Cadherin EGF LAG seven-pass G-type receptor 2 OS=Homo sapiens GN=CELSR2 PE=2 SV=1 - [CELR2_HUMAN]	Q9HCU4	N-Term(Diethyl); S10(Hex); S15(Hex)	ETciD	1.07498	1	0	1	1	Light	2.243				0	0	2	1142.08	2283.15	1.50047	79.5342
VTASDRDK	Cadherin EGF LAG seven-pass G-type receptor 2 OS=Homo sapiens GN=CELSR2 PE=2 SV=1 - [CELR2_HUMAN]	Q9HCU4	N-Term(Diethyl); T2(Hex); K8(Diethyl)	ETciD	0.537035	1	0	1	1	Light	1.89584				1	34.2214	2	583.319	1165.63	0.248754	19.1752
LNEDAAVGTSVVTVSAVDR	Cadherin EGF LAG seven-pass G-type receptor 2 OS=Homo sapiens GN=CELSR2 PE=2 SV=1 - [CELR2_HUMAN]	Q9HCU4	N-Term(Diethyl); S10(Hex); S15(Hex)	ETciD	1.0569	1	0	1	1	Light	2.62117				0	48.7034	3	761.72	2283.14	-0.109392	79.4553
[truncated: 469 more rows]

## Sheet: Exp8
Sequence	Protein Descriptions	Protein Group Accessions	Modifications	Activation Type	Ratio (Heavy/Light)	ΔScore	ΔCn	Rank	Search Engine Rank	Quan Channel	XCorr	Amanda Score	E-Value	P-Value	# Missed Cleavages	Isolation Interference [%]	Charge	m/z [Da]	MH+ [Da]	ΔM [ppm]	RT [min]
[truncated: 788 more rows]

[truncated: 2 more sheets: Exp9, Exp10]
